# Supplementary material for: Investigating the Human Host—ssRNA Virus Interaction Landscape Using the SMEAGOL Toolbox
Source: Viruses. 2022 Jun 29;14(7):1436. doi: 10.3390/v14071436 (PMC9317827; doi:10.3390/v14071436)
Supplement: Supplementary file 1 [file viruses-14-01436-s001.zip]

Archive with 8 entries (8 files):
- Supplementary_Materials.pdf
- Supp_Data_S1_Selection_Genomes_ssRNA.xlsx
- Supp_Data_S2_predicted_binding_sites.tsv.tar.gz
- Supp_Data_S3_genome_enrichment_results.xlsx
- Supp_Data_S4_gpIV_utr_enrichment.xlsx
- Supp_Data_S5_SARS_CoV_2_validated_binders.tsv
- Supp_Data_S6_SARS_CoV_2_validated_RBP_effectors.tsv
- Supp_Data_S7_sarscov2_potential_escape_variants.tsv
