# Supplementary material for: Investigating the Human Host—ssRNA Virus Interaction Landscape Using the SMEAGOL Toolbox
Source: Viruses. 2022 Jun 29;14(7):1436. doi: 10.3390/v14071436 (PMC9317827; doi:10.3390/v14071436)
Supplement: Supplementary file 1 [file viruses-14-01436-s001.zip › Supp_Data_S1_Selection_Genomes_ssRNA.xlsx]

## Sheet: Included_ssRNA
Baltimore Classification	Type	Genome Info	Family	Genus	Species	Organism Name	Organism Groups	Assembly	Level	Size(Mb)	GC%	Host	CDS	Neighbors	Release Date	RefSeq FTP	Type	Reference Source Information	Observation
IV	(+)ssRNA	Monopartite	Astroviridae	Mamastrovirus	Mamastrovirus 1	Mamastrovirus 1	Viruses;Other;Astroviridae	GCA_001736695.1	Complete	0.006673	44.6	human,vertebrates	2	41	2008-01-05T00:00:00Z	ftp://ftp.ncbi.nlm.nih.gov/genomes/all/GCF/001/736/695/GCF_001736695.1_ViralProj343484
IV	(+)ssRNA	Monopartite	Astroviridae	Mamastrovirus	Mamastrovirus 8	Mamastrovirus 8	Viruses;Other;Astroviridae	GCA_000884395.1	Complete	0.006534	43.5	human	3	1	2009-10-24T00:00:00Z	ftp://ftp.ncbi.nlm.nih.gov/genomes/all/GCF/000/884/395/GCF_000884395.1_ViralProj41413
IV	(+)ssRNA	Monopartite	Astroviridae	NA	Astrovirus MLB1	Astrovirus MLB1	Viruses;Other;Astroviridae	GCA_000880715.1	Complete	0.006171	40.9	human	3	6	2008-10-21T00:00:00Z	ftp://ftp.ncbi.nlm.nih.gov/genomes/all/GCF/000/880/715/GCF_000880715.1_ViralProj32327
IV	(+)ssRNA	Monopartite	Astroviridae	NA	Astrovirus MLB2	Astrovirus MLB2	Viruses;Other;Astroviridae	GCA_000895575.1	Complete	0.006119	40.5	human	3	2	2011-11-05T00:00:00Z	ftp://ftp.ncbi.nlm.nih.gov/genomes/all/GCF/000/895/575/GCF_000895575.1_ViralProj76723
IV	(+)ssRNA	Monopartite	Astroviridae	NA	Astrovirus MLB3	Astrovirus MLB3	Viruses;Other;Astroviridae	GCA_000899535.1	Complete	0.006124	40	human	3		2012-10-31T00:00:00Z	ftp://ftp.ncbi.nlm.nih.gov/genomes/all/GCF/000/899/535/GCF_000899535.1_ViralProj178563
IV	(+)ssRNA	Monopartite	Astroviridae	NA	Astrovirus VA1	Astrovirus VA1	Viruses;Other;Astroviridae	GCA_000885815.1	Complete	0.006586	41.9	human,vertebrates	3	3	2009-08-04T00:00:00Z	ftp://ftp.ncbi.nlm.nih.gov/genomes/all/GCF/000/885/815/GCF_000885815.1_ViralProj39811
IV	(+)ssRNA	Monopartite	Astroviridae	NA	Astrovirus VA3	Astrovirus VA3	Viruses;Other;Astroviridae	GCA_000901475.1	Complete	0.006581	41.8	human	3		2012-10-31T00:00:00Z	ftp://ftp.ncbi.nlm.nih.gov/genomes/all/GCF/000/901/475/GCF_000901475.1_ViralProj178564
IV	(+)ssRNA	Monopartite	Astroviridae	NA	Astrovirus VA4	Astrovirus VA4	Viruses;Other;Astroviridae	GCA_000897955.1	Complete	0.006518	43	human	3		2012-10-31T00:00:00Z	ftp://ftp.ncbi.nlm.nih.gov/genomes/all/GCF/000/897/955/GCF_000897955.1_ViralProj178562
IV	(+)ssRNA	Monopartite	Astroviridae	NA	Bastrovirus 7	Bastrovirus 7	Viruses;Other;Astroviridae	GCA_002285025.1	Complete	0.006339	58.4	human	3		2016-02-13T00:00:00Z	ftp://ftp.ncbi.nlm.nih.gov/genomes/all/GCF/002/285/025/GCF_002285025.1_ViralProj401021
IV	(+)ssRNA	Monopartite	Astroviridae	NA	Human astrovirus 1	Human astrovirus 1	Viruses;Other;Astroviridae	GCA_000861865.1	Complete	0.006813	44.8	human,vertebrates	2	13	1993-11-01T00:00:00Z	ftp://ftp.ncbi.nlm.nih.gov/genomes/all/GCF/000/861/865/GCF_000861865.1_ViralProj15436	Reference	ViralZone
IV	(+)ssRNA	Monopartite	Astroviridae	NA	Human astrovirus BF34	Human astrovirus BF34	Viruses;Other;Astroviridae	GCA_000923215.1	Complete	0.006577	43.8	human	3		2014-07-08T00:00:00Z	ftp://ftp.ncbi.nlm.nih.gov/genomes/all/GCF/000/923/215/GCF_000923215.1_ViralProj255104
IV	(+)ssRNA	Monopartite	Caliciviridae	Norovirus	Norwalk virus	Norwalk virus	Viruses;Other;Caliciviridae	GCA_000864005.1	Complete	0.007654	48	human,vertebrates	3	1519	1993-08-02T00:00:00Z	ftp://ftp.ncbi.nlm.nih.gov/genomes/all/GCF/000/864/005/GCF_000864005.1_ViralProj15520	Reference	NCBI, ViralZone
IV	(+)ssRNA	Monopartite	Caliciviridae	Sapovirus	Sapporo virus	Sapovirus Hu/Dresden/pJG-Sap01/DE	Viruses;Other;Caliciviridae	GCA_000854265.1	Complete	0.007429	50.6	human,vertebrates	3	162	2004-09-05T00:00:00Z	ftp://ftp.ncbi.nlm.nih.gov/genomes/all/GCF/000/854/265/GCF_000854265.1_ViralProj15048	Reference	ViralZone
IV	(+)ssRNA	Monopartite	Coronaviridae	Alphacoronavirus	Human coronavirus 229E	Human coronavirus 229E	Viruses;Other;Coronaviridae	GCA_000853505.1	Complete	0.027317	38.3	human,vertebrates	8	70	2001-01-11T00:00:00Z	ftp://ftp.ncbi.nlm.nih.gov/genomes/all/GCF/000/853/505/GCF_000853505.1_ViralProj14913	Reference	Uniprot
IV	(+)ssRNA	Monopartite	Coronaviridae	Alphacoronavirus	Human coronavirus NL63 strain:Amsterdam I	Human coronavirus NL63 strain:Amsterdam I	Viruses;Other;Coronaviridae	GCA_000853865.1	Complete	0.027553	34.5	human	6	66	2004-03-17T00:00:00Z	ftp://ftp.ncbi.nlm.nih.gov/genomes/all/GCF/000/853/865/GCF_000853865.1_ViralProj14960
IV	(+)ssRNA	Monopartite	Coronaviridae	Betacoronavirus	Betacoronavirus England 1	Betacoronavirus England 1	Viruses;Other;Coronaviridae	GCA_002816195.1	Complete	0.030111	41.2	human,vertebrates	10	568	2012-12-05T00:00:00Z	ftp://ftp.ncbi.nlm.nih.gov/genomes/all/GCF/002/816/195/GCF_002816195.1_ASM281619v1
IV	(+)ssRNA	Monopartite	Coronaviridae	Betacoronavirus	Human betacoronavirus 2c EMC/2012 (MERS-CoV)	Human betacoronavirus 2c EMC/2012 (MERS-CoV)	Viruses;Other;Coronaviridae	GCA_000901155.1	Complete	0.030119	41.2	human,vertebrates	11	568	2012-09-27T00:00:00Z	ftp://ftp.ncbi.nlm.nih.gov/genomes/all/GCF/000/901/155/GCF_000901155.1_ViralProj183710	Reference
IV	(+)ssRNA	Monopartite	Coronaviridae	Betacoronavirus	Human coronavirus HKU1	Human coronavirus HKU1	Viruses;Other;Coronaviridae	GCA_000858765.1	Complete	0.029926	32.1	human	8	46	2004-12-21T00:00:00Z	ftp://ftp.ncbi.nlm.nih.gov/genomes/all/GCF/000/858/765/GCF_000858765.1_ViralProj15139
IV	(+)ssRNA	Monopartite	Coronaviridae	Betacoronavirus	Human coronavirus OC43 strain:ATCC VR-759	Human coronavirus OC43 strain:ATCC VR-759	Viruses;Other;Coronaviridae	GCA_003972325.1	Complete	0.030741	36.8	human,vertebrates	8	309	2004-08-04T00:00:00Z	ftp://ftp.ncbi.nlm.nih.gov/genomes/all/GCF/003/972/325/GCF_003972325.1_ASM397232v1
IV	(+)ssRNA	Monopartite	Coronaviridae	Betacoronavirus	SARS coronavirus Tor2 (SARS-CoV)	SARS coronavirus Tor2 (SARS-CoV)	Viruses;Other;Coronaviridae	GCA_000864885.1	Complete	0.029751	40.8	human,vertebrates	14	21511	2003-04-14T00:00:00Z	ftp://ftp.ncbi.nlm.nih.gov/genomes/all/GCF/000/864/885/GCF_000864885.1_ViralProj15500	Reference
IV	(+)ssRNA	Monopartite	Coronaviridae	Betacoronavirus	Severe acute respiratory syndrome coronavirus 2 (SARS-CoV-2)	Severe acute respiratory syndrome coronavirus 2 (SARS-CoV-2)	Viruses;Other;Coronaviridae	GCA_009858895.3	Complete	0.029903	38	human,vertebrates	12	21511	2020-01-12T00:00:00Z	ftp://ftp.ncbi.nlm.nih.gov/genomes/all/GCF/009/858/895/GCF_009858895.2_ASM985889v3	Reference
IV	(+)ssRNA	Monopartite	Flaviviridae	Flavivirus	Alkhumra hemorrhagic fever virus	Alkhumra hemorrhagic fever virus	Viruses;Other;Flaviviridae	GCA_000863365.1	Complete	0.010685	54.1	human,invertebrates,vertebrates	1		2001-09-29T00:00:00Z	ftp://ftp.ncbi.nlm.nih.gov/genomes/all/GCF/000/863/365/GCF_000863365.1_ViralProj15387
IV	(+)ssRNA	Monopartite	Flaviviridae	Flavivirus	Aroa virus	Bussuquara virus	Viruses;Other;Flaviviridae	GCA_000872985.1	Complete	0.010815	49.9	human,invertebrates,vertebrates	1	7	2005-10-30T00:00:00Z	ftp://ftp.ncbi.nlm.nih.gov/genomes/all/GCF/000/872/985/GCF_000872985.1_ViralProj18847
IV	(+)ssRNA	Monopartite	Flaviviridae	Flavivirus	Dengue virus	Dengue virus 1	Viruses;Other;Flaviviridae	GCA_000862125.1	Complete	0.010735	46.7	human,invertebrates,vertebrates	1	5649	1997-02-28T00:00:00Z	ftp://ftp.ncbi.nlm.nih.gov/genomes/all/GCF/000/862/125/GCF_000862125.1_ViralProj15306	Reference	ViralZone
IV	(+)ssRNA	Monopartite	Flaviviridae	Flavivirus	Dengue virus	Dengue virus 2 Thailand/16681/84	Viruses;Other;Flaviviridae	GCA_000871845.1	Complete	0.010723	45.8	human,invertebrates,vertebrates	1	5649	1993-08-02T00:00:00Z	ftp://ftp.ncbi.nlm.nih.gov/genomes/all/GCF/000/871/845/GCF_000871845.1_ViralProj20183	Reference	NCBI
IV	(+)ssRNA	Monopartite	Flaviviridae	Flavivirus	Dengue virus	Dengue virus 3	Viruses;Other;Flaviviridae	GCA_000866625.1	Complete	0.010707	46.7	human,invertebrates,vertebrates	1	5649	1993-08-02T00:00:00Z	ftp://ftp.ncbi.nlm.nih.gov/genomes/all/GCF/000/866/625/GCF_000866625.1_ViralProj15598
IV	(+)ssRNA	Monopartite	Flaviviridae	Flavivirus	Dengue virus	Dengue virus 4	Viruses;Other;Flaviviridae	GCA_000865065.1	Complete	0.010649	47.1	human,invertebrates,vertebrates	1	5649	2001-01-03T00:00:00Z	ftp://ftp.ncbi.nlm.nih.gov/genomes/all/GCF/000/865/065/GCF_000865065.1_ViralProj15599
IV	(+)ssRNA	Monopartite	Flaviviridae	Flavivirus	Ilheus virus	Ilheus virus	Viruses;Other;Flaviviridae	GCA_000870465.1	Complete	0.010755	52.3	human,invertebrates	1	3	2005-10-30T00:00:00Z	ftp://ftp.ncbi.nlm.nih.gov/genomes/all/GCF/000/870/465/GCF_000870465.1_ViralProj18845
IV	(+)ssRNA	Monopartite	Flaviviridae	Flavivirus	Japanese encephalitis virus	Japanese encephalitis virus	Viruses;Other;Flaviviridae	GCA_000862145.1	Complete	0.010976	51.4	human,invertebrates,vertebrates	2	358	1993-08-02T00:00:00Z	ftp://ftp.ncbi.nlm.nih.gov/genomes/all/GCF/000/862/145/GCF_000862145.1_ViralProj15310	Reference	NCBI
IV	(+)ssRNA	Monopartite	Flaviviridae	Flavivirus	Kyasanur Forest disease virus	Kyasanur Forest disease virus	Viruses;Other;Flaviviridae	GCA_002820625.1	Complete	0.010376	55.2	human,invertebrates,vertebrates	1	28	2006-07-01T00:00:00Z	ftp://ftp.ncbi.nlm.nih.gov/genomes/all/GCF/002/820/625/GCF_002820625.1_ASM282062v1
IV	(+)ssRNA	Monopartite	Flaviviridae	Flavivirus	Langat virus	Langat virus	Viruses;Other;Flaviviridae	GCA_000860805.1	Complete	0.010943	54.3	human,invertebrates,vertebrates	1	4	2000-06-11T00:00:00Z	ftp://ftp.ncbi.nlm.nih.gov/genomes/all/GCF/000/860/805/GCF_000860805.1_ViralProj15370
IV	(+)ssRNA	Monopartite	Flaviviridae	Flavivirus	Louping ill virus	Louping ill virus	Viruses;Other;Flaviviridae	GCA_000863165.1	Complete	0.010871	54.9	human,invertebrates,vertebrates	1	25	1997-04-29T00:00:00Z	ftp://ftp.ncbi.nlm.nih.gov/genomes/all/GCF/000/863/165/GCF_000863165.1_ViralProj15343
IV	(+)ssRNA	Monopartite	Flaviviridae	Flavivirus	Mogiana tick virus	Mogiana tick virus	Viruses;Other;Flaviviridae	GCA_002037735.1	Complete	0.011025	53.8244	human,invertebrates,vertebrates	4	67	2014-03-27T00:00:00Z	ftp://ftp.ncbi.nlm.nih.gov/genomes/all/GCF/002/037/735/GCF_002037735.1_ViralMultiSegProj379595
IV	(+)ssRNA	Monopartite	Flaviviridae	Flavivirus	Murray Valley encephalitis virus	Murray Valley encephalitis virus	Viruses;Other;Flaviviridae	GCA_000863565.1	Complete	0.011014	48.7	human,invertebrates,vertebrates	2	17	1999-11-02T00:00:00Z	ftp://ftp.ncbi.nlm.nih.gov/genomes/all/GCF/000/863/565/GCF_000863565.1_ViralProj15430	Reference	NCBI
IV	(+)ssRNA	Monopartite	Flaviviridae	Flavivirus	Omsk hemorrhagic fever virus	Omsk hemorrhagic fever virus	Viruses;Other;Flaviviridae	GCA_000855505.1	Complete	0.010787	53.6	human,invertebrates,vertebrates	1	3	2003-08-08T00:00:00Z	ftp://ftp.ncbi.nlm.nih.gov/genomes/all/GCF/000/855/505/GCF_000855505.1_ViralProj14995
IV	(+)ssRNA	Monopartite	Flaviviridae	Flavivirus	Powassan virus	Powassan virus	Viruses;Other;Flaviviridae	GCA_000860485.1	Complete	0.010839	53.3	human,invertebrates,vertebrates	1	25	1993-06-14T00:00:00Z	ftp://ftp.ncbi.nlm.nih.gov/genomes/all/GCF/000/860/485/GCF_000860485.1_ViralProj15304
IV	(+)ssRNA	Monopartite	Flaviviridae	Flavivirus	Rio Bravo virus	Rio Bravo virus	Viruses;Other;Flaviviridae	GCA_000862425.1	Complete	0.01014	43.2		1	1	2000-03-03T00:00:00Z	ftp://ftp.ncbi.nlm.nih.gov/genomes/all/GCF/000/862/425/GCF_000862425.1_ViralProj15368			Missing human host
IV	(+)ssRNA	Monopartite	Flaviviridae	Flavivirus	Rocio virus	Rocio virus	Viruses;Other;Flaviviridae	GCA_004128575.1	Complete	0.010794	52.3	human,invertebrates	1	3	2005-10-30T00:00:00Z	ftp://ftp.ncbi.nlm.nih.gov/genomes/all/GCF/004/128/575/GCF_004128575.1_ASM412857v1
IV	(+)ssRNA	Monopartite	Flaviviridae	Flavivirus	Saint Louis encephalitis virus	Saint Louis encephalitis virus	Viruses;Other;Flaviviridae	GCA_000866785.1	Complete	0.01094	49.7	human,invertebrates,vertebrates	1	42	2005-11-04T00:00:00Z	ftp://ftp.ncbi.nlm.nih.gov/genomes/all/GCF/000/866/785/GCF_000866785.1_ViralProj16150
IV	(+)ssRNA	Monopartite	Flaviviridae	Flavivirus	Sepik virus	Sepik virus	Viruses;Other;Flaviviridae	GCA_000868725.1	Complete	0.010793	47.3	invertebrates	1	2	2006-12-19T00:00:00Z	ftp://ftp.ncbi.nlm.nih.gov/genomes/all/GCF/000/868/725/GCF_000868725.1_ViralProj18513			Missing human host
IV	(+)ssRNA	Monopartite	Flaviviridae	Flavivirus	Spondweni virus	Spondweni virus	Viruses;Other;Flaviviridae	GCA_001610725.1	Complete	0.01029	52.3	human,invertebrates	1	15	2009-09-16T00:00:00Z	ftp://ftp.ncbi.nlm.nih.gov/genomes/all/GCF/001/610/725/GCF_001610725.1_ViralProj311759	Reference	NCBI
IV	(+)ssRNA	Monopartite	Flaviviridae	Flavivirus	Tembusu virus	Tembusu virus	Viruses;Other;Flaviviridae	GCA_000894755.1	Complete	0.01099	49	human,invertebrates,vertebrates	1	144	2011-07-13T00:00:00Z	ftp://ftp.ncbi.nlm.nih.gov/genomes/all/GCF/000/894/755/GCF_000894755.1_ViralProj70159
IV	(+)ssRNA	Monopartite	Flaviviridae	Flavivirus	Tick-borne encephalitis virus	Tick-borne encephalitis virus	Viruses;Other;Flaviviridae	GCA_000863125.1	Complete	0.011141	53.8	human,invertebrates,vertebrates	1	225	1995-09-05T00:00:00Z	ftp://ftp.ncbi.nlm.nih.gov/genomes/all/GCF/000/863/125/GCF_000863125.1_ViralProj15335
IV	(+)ssRNA	Monopartite	Flaviviridae	Flavivirus	Usutu virus	Usutu virus	Viruses;Other;Flaviviridae	GCA_000854945.1	Complete	0.011066	51	human,invertebrates,vertebrates	2	275	2004-10-05T00:00:00Z	ftp://ftp.ncbi.nlm.nih.gov/genomes/all/GCF/000/854/945/GCF_000854945.1_ViralProj15047
IV	(+)ssRNA	Monopartite	Flaviviridae	Flavivirus	Wesselsbron virus	Wesselsbron virus	Viruses;Other;Flaviviridae	GCA_000883915.1	Complete	0.010814	47.7	human,invertebrates,vertebrates	1	6	2009-06-01T00:00:00Z	ftp://ftp.ncbi.nlm.nih.gov/genomes/all/GCF/000/883/915/GCF_000883915.1_ViralProj38295
IV	(+)ssRNA	Monopartite	Flaviviridae	Flavivirus	West Nile virus	West Nile virus	Viruses;Other;Flaviviridae	GCA_000861085.1	Complete	0.010962	51.1	human,invertebrates,vertebrates	2	1886	1993-02-16T00:00:00Z	ftp://ftp.ncbi.nlm.nih.gov/genomes/all/GCF/000/861/085/GCF_000861085.1_ViralProj15431	Reference	NCBI
IV	(+)ssRNA	Monopartite	Flaviviridae	Flavivirus	Yellow fever virus	Yellow fever virus	Viruses;Other;Flaviviridae	GCA_000857725.1	Complete	0.010862	49.7	human,invertebrates,vertebrates	1	225	1986-11-18T00:00:00Z	ftp://ftp.ncbi.nlm.nih.gov/genomes/all/GCF/000/857/725/GCF_000857725.1_ViralProj15284	Reference	ViralZone
IV	(+)ssRNA	Monopartite	Flaviviridae	Flavivirus	Zika virus	Zika virus	Viruses;Other;Flaviviridae	GCA_000882815.1	Complete	0.010794	50.9	human,invertebrates,vertebrates	1	767	2005-10-30T00:00:00Z	ftp://ftp.ncbi.nlm.nih.gov/genomes/all/GCF/000/882/815/GCF_000882815.3_ViralProj36615	Reference	NCBI, ViralZone
IV	(+)ssRNA	Monopartite	Flaviviridae	Hepacivirus	Hepacivirus B	Hepacivirus B	Viruses;Other;Flaviviridae	GCA_002820785.1	Complete	0.009143	50.5	human	1		1995-04-12T00:00:00Z	ftp://ftp.ncbi.nlm.nih.gov/genomes/all/GCF/002/820/785/GCF_002820785.1_ASM282078v1
IV	(+)ssRNA	Monopartite	Flaviviridae	Hepacivirus	Hepacivirus C	Hepatitis C virus (isolate Th580) Genotype: 6	Viruses;Other;Flaviviridae	GCA_000872025.1	Complete	0.009628	55.4	human,vertebrates	2	2287	1998-09-08T00:00:00Z	ftp://ftp.ncbi.nlm.nih.gov/genomes/all/GCF/000/872/025/GCF_000872025.1_ViralProj20939
IV	(+)ssRNA	Monopartite	Flaviviridae	Hepacivirus	Hepacivirus C	Hepatitis C virus QC69 Genotype: 7	Viruses;Other;Flaviviridae	GCA_001712785.1	Complete	0.009443	56.8	human,vertebrates	2	2287	2007-11-07T00:00:00Z	ftp://ftp.ncbi.nlm.nih.gov/genomes/all/GCF/001/712/785/GCF_001712785.1_ViralProj339556	Reference	NCBI
IV	(+)ssRNA	Monopartite	Flaviviridae	Hepacivirus	Hepacivirus C	Hepatitis C virus subtype 1a	Viruses;Other;Flaviviridae	GCA_000861845.1	Complete	0.009646	58.2	human,vertebrates	2	2287	1997-08-09T00:00:00Z	ftp://ftp.ncbi.nlm.nih.gov/genomes/all/GCF/000/861/845/GCF_000861845.1_ViralProj15432	Reference	NCBI, ViralZone
IV	(+)ssRNA	Monopartite	Flaviviridae	Hepacivirus	Hepacivirus C	Hepatitis C virus subtype 2a	Viruses;Other;Flaviviridae	GCA_000871165.1	Complete	0.009711	56.9	human,vertebrates	2	2287	1999-10-05T00:00:00Z	ftp://ftp.ncbi.nlm.nih.gov/genomes/all/GCF/000/871/165/GCF_000871165.1_ViralProj20937
IV	(+)ssRNA	Monopartite	Flaviviridae	Hepacivirus	Hepatitis GB virus B	Hepatitis GB virus B	Viruses;Other;Flaviviridae	GCA_000862405.1	Complete	0.009399	50.6	human,vertebrates	1	8	1999-10-07T00:00:00Z	ftp://ftp.ncbi.nlm.nih.gov/genomes/all/GCF/000/862/405/GCF_000862405.1_ViralProj15364	Reference	NCBI
IV	(+)ssRNA	Monopartite	Flaviviridae	NA	Jingmen tick virus	Jingmen tick virus	Viruses;Other;Flaviviridae	GCA_000919875.1	Complete	0.011579	52.9358	human,invertebrates,vertebrates	5	67	2014-05-13T00:00:00Z	ftp://ftp.ncbi.nlm.nih.gov/genomes/all/GCF/000/919/875/GCF_000919875.1_ViralMultiSegProj247973
IV	(+)ssRNA	Monopartite	Flaviviridae	Pegivirus	GB virus C	GB virus C (Pegivirus C)	Viruses;Other;Flaviviridae	GCA_000862005.1	Complete	0.009392	59.1	human,vertebrates	1	84	1996-01-27T00:00:00Z	ftp://ftp.ncbi.nlm.nih.gov/genomes/all/GCF/000/862/005/GCF_000862005.1_ViralProj15467
IV	(+)ssRNA	Monopartite	Flaviviridae	Pegivirus	Human hepegivirus	Human hepegivirus	Viruses;Other;Flaviviridae	GCA_002821385.1	Complete	0.009538	53.6	human	1	18	2015-09-20T00:00:00Z	ftp://ftp.ncbi.nlm.nih.gov/genomes/all/GCF/002/821/385/GCF_002821385.1_ASM282138v1
IV	(+)ssRNA	Monopartite	Flaviviridae	Pegivirus	Human pegivirus 2	Human pegivirus 2	Viruses;Other;Flaviviridae	GCA_001310135.2	Complete	0.009867	53.9	human	1	18	2015-10-04T00:00:00Z	ftp://ftp.ncbi.nlm.nih.gov/genomes/all/GCF/001/310/135/GCF_001310135.2_ViralProj298087
IV	(+)ssRNA	Monopartite	Flaviviridae	Pegivirus	Pegivirus A	Pegivirus A	Viruses;Other;Flaviviridae	GCA_000847425.1	Complete	0.00955	57.9	human,vertebrates	1	68	1997-09-23T00:00:00Z	ftp://ftp.ncbi.nlm.nih.gov/genomes/all/GCF/000/847/425/GCF_000847425.1_ViralProj14647	Reference	NCBI, ViralZone
IV	(+)ssRNA	Monopartite	Flaviviridae	Pegivirus	Simian pegivirus	Simian pegivirus	Viruses;Other;Flaviviridae	GCA_000921975.1	Complete	0.009525	56.6	human,vertebrates	1	68	2014-06-20T00:00:00Z	ftp://ftp.ncbi.nlm.nih.gov/genomes/all/GCF/000/921/975/GCF_000921975.1_ViralProj253339
IV	(+)ssRNA	Monopartite	Hepeviridae	Orthohepevirus	Hepatitis E virus	Hepatitis E virus (Orthohepevirus A)	Viruses;Other;Hepeviridae	GCA_000861105.1	Complete	0.007176	57.9	human,vertebrates	3	595	1993-08-02T00:00:00Z	ftp://ftp.ncbi.nlm.nih.gov/genomes/all/GCF/000/861/105/GCF_000861105.1_ViralProj15435	Reference	ViralZone
IV	(+)ssRNA	Monopartite	Matonaviridae	Rubivirus	Rubella virus	Rubella virus	Viruses;Other;Matonaviridae	GCA_000863025.1	Complete	0.009762	69.6	human	2	85	1993-08-03T00:00:00Z	ftp://ftp.ncbi.nlm.nih.gov/genomes/all/GCF/000/863/025/GCF_000863025.1_ViralProj15315	Reference	ViralZone
IV	(+)ssRNA	Monopartite	Picornaviridae	Cardiovirus	Cardiovirus A	Encephalomyocarditis virus	Viruses;Other;Picornaviridae	GCA_000862985.1	Complete	0.007835	49.5	human,vertebrates	2	35	1992-02-25T00:00:00Z	ftp://ftp.ncbi.nlm.nih.gov/genomes/all/GCF/000/862/985/GCF_000862985.1_ViralProj15307	Reference	ViralZone
IV	(+)ssRNA	Monopartite	Picornaviridae	Cardiovirus	Cardiovirus B	Theiler's murine encephalomyeltits virus GDVII	Viruses;Other;Picornaviridae	GCA_000861185.1	Complete	0.008101	49.1	human,vertebrates	3	55	1990-11-14T00:00:00Z	ftp://ftp.ncbi.nlm.nih.gov/genomes/all/GCF/000/861/185/GCF_000861185.1_ViralProj15292
IV	(+)ssRNA	Monopartite	Picornaviridae	Cardiovirus	Cardiovirus D	Saffold virus	Viruses;Other;Picornaviridae	GCA_000871545.1	Complete	0.008115	42.9	human,vertebrates	2	55	2007-04-25T00:00:00Z	ftp://ftp.ncbi.nlm.nih.gov/genomes/all/GCF/000/871/545/GCF_000871545.1_ViralProj19577
IV	(+)ssRNA	Monopartite	Picornaviridae	Cosavirus	Cosavirus A	Cosavirus A	Viruses;Other;Picornaviridae	GCA_000885595.1	Complete	0.007632	43.8	human,vertebrates	1	7	2009-01-10T00:00:00Z	ftp://ftp.ncbi.nlm.nih.gov/genomes/all/GCF/000/885/595/GCF_000885595.1_ViralProj38497
IV	(+)ssRNA	Monopartite	Picornaviridae	Cosavirus	Cosavirus F	Cosavirus F	Viruses;Other;Picornaviridae	GCA_002117635.1	Complete	0.006656	44.4	human,vertebrates	1	1	2012-05-10T00:00:00Z	ftp://ftp.ncbi.nlm.nih.gov/genomes/all/GCF/002/117/635/GCF_002117635.1_ViralProj384965
IV	(+)ssRNA	Monopartite	Picornaviridae	Enterovirus	Cosavirus B	Human cosavirus B1	Viruses;Other;Picornaviridae	GCA_000884955.1	Complete	0.007205	43.8	human	1		2009-01-10T00:00:00Z	ftp://ftp.ncbi.nlm.nih.gov/genomes/all/GCF/000/884/955/GCF_000884955.1_ViralProj38499
IV	(+)ssRNA	Monopartite	Picornaviridae	Enterovirus	Cosavirus D	Human cosavirus D1	Viruses;Other;Picornaviridae	GCA_000886475.1	Complete	0.007215	42.5	human	1		2009-01-10T00:00:00Z	ftp://ftp.ncbi.nlm.nih.gov/genomes/all/GCF/000/886/475/GCF_000886475.1_ViralProj38501
IV	(+)ssRNA	Monopartite	Picornaviridae	Enterovirus	Cosavirus E	Human cosavirus E1	Viruses;Other;Picornaviridae	GCA_000886455.1	Complete	0.00658	41.9	human	1		2009-01-27T00:00:00Z	ftp://ftp.ncbi.nlm.nih.gov/genomes/all/GCF/000/886/455/GCF_000886455.1_ViralProj38493
IV	(+)ssRNA	Monopartite	Picornaviridae	Enterovirus	Enterovirus A	Coxsackievirus A16	Viruses;Other;Picornaviridae	GCA_000861905.1	Complete	0.007413	47.9	human,vertebrates	1	2264	1994-03-08T00:00:00Z	ftp://ftp.ncbi.nlm.nih.gov/genomes/all/GCF/000/861/905/GCF_000861905.1_ViralProj15445
IV	(+)ssRNA	Monopartite	Picornaviridae	Enterovirus	Enterovirus B	Coxsackievirus B3	Viruses;Other;Picornaviridae	GCA_002816685.1	Complete	0.007399	47.7	human,vertebrates	1	709	1993-08-02T00:00:00Z	ftp://ftp.ncbi.nlm.nih.gov/genomes/all/GCF/002/816/685/GCF_002816685.1_ASM281668v1
IV	(+)ssRNA	Monopartite	Picornaviridae	Enterovirus	Enterovirus C	Human poliovirus 1 Mahoney	Viruses;Other;Picornaviridae	GCA_000861165.1	Complete	0.00744	46.3	human,vertebrates	1	863	1982-11-03T00:00:00Z	ftp://ftp.ncbi.nlm.nih.gov/genomes/all/GCF/000/861/165/GCF_000861165.1_ViralProj15288	Reference	NCBI, ViralZone
IV	(+)ssRNA	Monopartite	Picornaviridae	Enterovirus	Enterovirus D	Enterovirus D68	Viruses;Other;Picornaviridae	GCA_002816725.1	Complete	0.007367	41.1	human	1	732	2004-08-18T00:00:00Z	ftp://ftp.ncbi.nlm.nih.gov/genomes/all/GCF/002/816/725/GCF_002816725.1_ASM281672v1
IV	(+)ssRNA	Monopartite	Picornaviridae	Enterovirus	Enterovirus D	Enterovirus D70	Viruses;Other;Picornaviridae	GCA_000861205.1	Complete	0.00739	42.8	human	1	732	1993-04-29T00:00:00Z	ftp://ftp.ncbi.nlm.nih.gov/genomes/all/GCF/000/861/205/GCF_000861205.1_ViralProj15297
IV	(+)ssRNA	Monopartite	Picornaviridae	Enterovirus	Rhinovirus A	Human rhinovirus A89	Viruses;Other;Picornaviridae	GCA_000862245.1	Complete	0.007152	39	human,vertebrates	1	200	1993-09-22T00:00:00Z	ftp://ftp.ncbi.nlm.nih.gov/genomes/all/GCF/000/862/245/GCF_000862245.1_ViralProj15330	Reference	ViralZone
IV	(+)ssRNA	Monopartite	Picornaviridae	Enterovirus	Rhinovirus B	Rhinovirus B14	Viruses;Other;Picornaviridae	GCA_000861265.1	Complete	0.007212	40.6	human	1	70	1985-09-03T00:00:00Z	ftp://ftp.ncbi.nlm.nih.gov/genomes/all/GCF/000/861/265/GCF_000861265.1_ViralProj15309
IV	(+)ssRNA	Monopartite	Picornaviridae	Enterovirus	Rhinovirus C	Rhinovirus C	Viruses;Other;Picornaviridae	GCA_000872325.1	Complete	0.007099	42.8	human,vertebrates	1	81	2007-11-11T00:00:00Z	ftp://ftp.ncbi.nlm.nih.gov/genomes/all/GCF/000/872/325/GCF_000872325.1_ViralProj27901
IV	(+)ssRNA	Monopartite	Picornaviridae	Hepatovirus	Hepatovirus A	Hepatovirus A	Viruses;Other;Picornaviridae	GCA_000860505.1	Complete	0.007478	37.9	human,vertebrates	2	138	1987-12-31T00:00:00Z	ftp://ftp.ncbi.nlm.nih.gov/genomes/all/GCF/000/860/505/GCF_000860505.1_ViralProj15308	Reference	ViralZone
IV	(+)ssRNA	Monopartite	Picornaviridae	Kobuvirus	Aichivirus A	Aichi virus 1	Viruses;Other;Picornaviridae	GCA_000861885.1	Complete	0.008251	58.9	human,vertebrates	1	29	1998-07-09T00:00:00Z	ftp://ftp.ncbi.nlm.nih.gov/genomes/all/GCF/000/861/885/GCF_000861885.1_ViralProj15441	Reference	ViralZone
IV	(+)ssRNA	Monopartite	Picornaviridae	Kobuvirus	Aichivirus B	Aichivirus B	Viruses;Other;Picornaviridae	GCA_000853805.1	Complete	0.008374	54.6	human,vertebrates	1	2	2002-11-09T00:00:00Z	ftp://ftp.ncbi.nlm.nih.gov/genomes/all/GCF/000/853/805/GCF_000853805.1_ViralProj14948
IV	(+)ssRNA	Monopartite	Picornaviridae	Parechovirus	Parechovirus A	Human parechovirus 2	Viruses;Other;Picornaviridae	GCA_000861505.1	Complete	0.007348	39.5	human,vertebrates	1	193	1998-05-25T00:00:00Z	ftp://ftp.ncbi.nlm.nih.gov/genomes/all/GCF/000/861/505/GCF_000861505.1_ViralProj15357	Reference	ViralZone
IV	(+)ssRNA	Monopartite	Picornaviridae	Rosavirus	Rosavirus A	Rosavirus A2	Viruses;Other;Picornaviridae	GCA_000918175.1	Complete	0.008931	51.4	human,vertebrates	1		2014-04-28T00:00:00Z	ftp://ftp.ncbi.nlm.nih.gov/genomes/all/GCF/000/918/175/GCF_000918175.1_ViralProj246130	Reference	ViralZone
IV	(+)ssRNA	Monopartite	Picornaviridae	Salivirus	Salivirus A	Salivirus NG-J1	Viruses;Other;Picornaviridae	GCA_000886535.1	Complete	0.007982	56.7	human,vertebrates	1	9	2009-06-17T00:00:00Z	ftp://ftp.ncbi.nlm.nih.gov/genomes/all/GCF/000/886/535/GCF_000886535.1_ViralProj39349	Reference	ViralZone
IV	(+)ssRNA	Monopartite	Togaviridae	Alphavirus	Barmah Forest virus	Barmah Forest virus	Viruses;Other;Togaviridae	GCA_000847585.1	Complete	0.011488	48.5	human,invertebrates,vertebrates	4	32	1997-01-14T00:00:00Z	ftp://ftp.ncbi.nlm.nih.gov/genomes/all/GCF/000/847/585/GCF_000847585.1_ViralProj14679
IV	(+)ssRNA	Monopartite	Togaviridae	Alphavirus	Chikungunya virus	Chikungunya virus	Viruses;Other;Togaviridae	GCA_000854045.1	Complete	0.011826	50	human,invertebrates,vertebrates	2	875	2002-09-06T00:00:00Z	ftp://ftp.ncbi.nlm.nih.gov/genomes/all/GCF/000/854/045/GCF_000854045.1_ViralProj14998
IV	(+)ssRNA	Monopartite	Togaviridae	Alphavirus	Eastern equine encephalitis virus	Eastern equine encephalitis virus	Viruses;Other;Togaviridae	GCA_000862705.1	Complete	0.011675	48.7	human,invertebrates,vertebrates	4	453	1991-12-16T00:00:00Z	ftp://ftp.ncbi.nlm.nih.gov/genomes/all/GCF/000/862/705/GCF_000862705.1_ViralProj15429
IV	(+)ssRNA	Monopartite	Togaviridae	Alphavirus	Madariaga virus	Madariaga virus	Viruses;Other;Togaviridae	GCA_000917835.1	Complete	0.011624	49.1	human,invertebrates,vertebrates	2	29	2014-03-17T00:00:00Z	ftp://ftp.ncbi.nlm.nih.gov/genomes/all/GCF/000/917/835/GCF_000917835.1_ViralProj242273
IV	(+)ssRNA	Monopartite	Togaviridae	Alphavirus	Mayaro virus	Mayaro virus	Viruses;Other;Togaviridae	GCA_000863385.1	Complete	0.011411	50.4	human,invertebrates,vertebrates	4	40	2002-02-22T00:00:00Z	ftp://ftp.ncbi.nlm.nih.gov/genomes/all/GCF/000/863/385/GCF_000863385.1_ViralProj15392
IV	(+)ssRNA	Monopartite	Togaviridae	Alphavirus	Onyong-nyong virus	Onyong-nyong virus	Viruses;Other;Togaviridae	GCA_000863005.1	Complete	0.011835	48.3	human,invertebrates	3	3	1990-09-15T00:00:00Z	ftp://ftp.ncbi.nlm.nih.gov/genomes/all/GCF/000/863/005/GCF_000863005.1_ViralProj15311
IV	(+)ssRNA	Monopartite	Togaviridae	Alphavirus	Ross River virus	Ross River virus	Viruses;Other;Togaviridae	GCA_000862165.1	Chromosome	0.011657	51.4	human,invertebrates,vertebrates	3	16	1989-09-15T00:00:00Z	ftp://ftp.ncbi.nlm.nih.gov/genomes/all/GCF/000/862/165/GCF_000862165.1_ViralProj15314
IV	(+)ssRNA	Monopartite	Togaviridae	Alphavirus	Semliki Forest virus	Semliki Forest virus	Viruses;Other;Togaviridae	GCA_000860285.1	Complete	0.011442	53.2	human,invertebrates,vertebrates	3	12	1987-03-09T00:00:00Z	ftp://ftp.ncbi.nlm.nih.gov/genomes/all/GCF/000/860/285/GCF_000860285.1_ViralProj15282
IV	(+)ssRNA	Monopartite	Togaviridae	Alphavirus	Sindbis virus	Sindbis virus	Viruses;Other;Togaviridae	GCA_000860545.1	Complete	0.011703	50.9	human,invertebrates,vertebrates	4	227	1985-03-15T00:00:00Z	ftp://ftp.ncbi.nlm.nih.gov/genomes/all/GCF/000/860/545/GCF_000860545.1_ViralProj15316
IV	(+)ssRNA	Monopartite	Togaviridae	Alphavirus	Venezuelan equine encephalitis virus	Venezuelan equine encephalitis virus	Viruses;Other;Togaviridae	GCA_000862105.1	Complete	0.011444	50.1	human,invertebrates,vertebrates	4	138	1993-06-11T00:00:00Z	ftp://ftp.ncbi.nlm.nih.gov/genomes/all/GCF/000/862/105/GCF_000862105.1_ViralProj15302
IV	(+)ssRNA	Monopartite	Togaviridae	Alphavirus	Western equine encephalitis virus	Western equine encephalitis virus	Viruses;Other;Togaviridae	GCA_000850885.1	Complete	0.011484	49.2	human,invertebrates,vertebrates	3	46	2000-01-27T00:00:00Z	ftp://ftp.ncbi.nlm.nih.gov/genomes/all/GCF/000/850/885/GCF_000850885.1_ViralProj14831
V	(-)ssRNA	Monopartite	Bornaviridae	Orthobornavirus	Mammalian 1 orthobornavirus	Borna disease virus 1	Viruses;Other;Bornaviridae	GCA_002366305.1	Complete	0.00891	50.1	human,vertebrates	6	38	1994-01-06T00:00:00Z	ftp://ftp.ncbi.nlm.nih.gov/genomes/all/GCF/002/366/305/GCF_002366305.1_ViralProj14675	Reference	ViralZone
V	(-)ssRNA	Monopartite	Bornaviridae	Orthobornavirus	Mammalian 1 orthobornavirus	Borna disease virus 2	Viruses;Other;Bornaviridae	GCA_000847565.2	Complete	0.008908	50.1	human,vertebrates	6	38	2001-09-19T00:00:00Z	ftp://ftp.ncbi.nlm.nih.gov/genomes/all/GCF/000/847/565/GCF_000847565.3_ViralProj14675.1
V	(-)ssRNA	Monopartite	Bornaviridae	Orthobornavirus	Mammalian 2 orthobornavirus	Variegated squirrel bornavirus 1	Viruses;Other;Bornaviridae	GCA_001698295.1	Complete	0.008798	42.8	human,vertebrates	6	21	2015-07-09T00:00:00Z	ftp://ftp.ncbi.nlm.nih.gov/genomes/all/GCF/001/698/295/GCF_001698295.1_ViralProj336046
V	(-)ssRNA	Monopartite	Filoviridae	Ebolavirus	Bundibugyo ebolavirus	Bundibugyo ebolavirus	Viruses;Other;Filoviridae	GCA_000889155.1	Complete	0.01894	42	human,vertebrates	9	22	2008-11-21T00:00:00Z	ftp://ftp.ncbi.nlm.nih.gov/genomes/all/GCF/000/889/155/GCF_000889155.1_ViralProj51245
V	(-)ssRNA	Monopartite	Filoviridae	Ebolavirus	Reston ebolavirus	Reston ebolavirus	Viruses;Other;Filoviridae	GCA_000854085.1	Complete	0.018891	40.6	human,vertebrates	9	20	2002-09-04T00:00:00Z	ftp://ftp.ncbi.nlm.nih.gov/genomes/all/GCF/000/854/085/GCF_000854085.1_ViralProj15006
V	(-)ssRNA	Monopartite	Filoviridae	Ebolavirus	Sudan ebolavirus	Sudan ebolavirus	Viruses;Other;Filoviridae	GCA_000855585.1	Complete	0.018875	41.3	human,vertebrates	9	19	2004-09-25T00:00:00Z	ftp://ftp.ncbi.nlm.nih.gov/genomes/all/GCF/000/855/585/GCF_000855585.1_ViralProj15012	Reference	NCBI
V	(-)ssRNA	Monopartite	Filoviridae	Ebolavirus	Tai Forest ebolavirus	Tai Forest ebolavirus	Viruses;Other;Filoviridae	GCA_000888475.1	Complete	0.018935	42.3	human,vertebrates	9	2	2008-11-21T00:00:00Z	ftp://ftp.ncbi.nlm.nih.gov/genomes/all/GCF/000/888/475/GCF_000888475.1_ViralProj51257	Reference	NCBI
V	(-)ssRNA	Monopartite	Filoviridae	Ebolavirus	Zaire ebolavirus	Ebola virus - Mayinga, Zaire, 1976	Viruses;Other;Filoviridae	GCA_000848505.1	Complete	0.018959	41.1	human,vertebrates	9	1574	1999-02-10T00:00:00Z	ftp://ftp.ncbi.nlm.nih.gov/genomes/all/GCF/000/848/505/GCF_000848505.1_ViralProj14703	Reference	ViralZone
V	(-)ssRNA	Monopartite	Filoviridae	Marburgvirus	Marburg marburgvirus	Ravn virus - Ravn, Kenya, 1987	Viruses;Other;Filoviridae	GCA_000943645.1	Complete	0.019114	37.8	human,vertebrates	7	87	2006-04-15T00:00:00Z	ftp://ftp.ncbi.nlm.nih.gov/genomes/all/GCF/000/943/645/GCF_000943645.1_ViralProj276005			Divergence from Marburg virus - Musoke, Kenya, 1980 > 10%
V	(-)ssRNA	Monopartite	Filoviridae	Marburgvirus	Marburg marburgvirus	Marburg virus - Musoke, Kenya, 1980	Viruses;Other;Filoviridae	GCA_000857325.2	Complete	0.019111	38.3	human,vertebrates	7	87	1994-01-26T00:00:00Z	ftp://ftp.ncbi.nlm.nih.gov/genomes/all/GCF/000/857/325/GCF_000857325.2_ViralProj15199	Reference
V	(-)ssRNA	Monopartite	Paramyxoviridae	Avulavirus	Avian avulavirus 1	Avian avulavirus 1	Viruses;Other;Paramyxoviridae	GCA_002834085.1	Complete	0.015192	46.8	human,vertebrates	6	869	2009-09-29T00:00:00Z	ftp://ftp.ncbi.nlm.nih.gov/genomes/all/GCF/002/834/085/GCF_002834085.1_ASM283408v1
V	(-)ssRNA	Monopartite	Paramyxoviridae	Avulavirus	Newcastle disease virus B1	Newcastle disease virus B1	Viruses;Other;Paramyxoviridae	GCA_000862725.1	Complete	0.015186	46.2	human,vertebrates	6		2000-12-02T00:00:00Z	ftp://ftp.ncbi.nlm.nih.gov/genomes/all/GCF/000/862/725/GCF_000862725.1_ViralProj15433	Reference	ViralZone
V	(-)ssRNA	Monopartite	Paramyxoviridae	Henipavirus	Hendra henipavirus	Hendra henipavirus	Viruses;Other;Paramyxoviridae	GCA_000852685.1	Complete	0.018234	39.4	human,vertebrates	8	14	1998-07-01T00:00:00Z	ftp://ftp.ncbi.nlm.nih.gov/genomes/all/GCF/000/852/685/GCF_000852685.1_ViralProj14911	Reference	ViralZone
V	(-)ssRNA	Monopartite	Paramyxoviridae	Henipavirus	Nipah henipavirus	Nipah henipavirus	Viruses;Other;Paramyxoviridae	GCA_000863625.1	Complete	0.018246	38.2	human,vertebrates	9	28	2000-06-01T00:00:00Z	ftp://ftp.ncbi.nlm.nih.gov/genomes/all/GCF/000/863/625/GCF_000863625.1_ViralProj15443
V	(-)ssRNA	Monopartite	Paramyxoviridae	Jeilongvirus	Beilong virus	Beilong virus	Viruses;Other;Paramyxoviridae	GCA_000868925.1	Complete	0.019212	42.8	vertebrates	11	4	2006-02-24T00:00:00Z	ftp://ftp.ncbi.nlm.nih.gov/genomes/all/GCF/000/868/925/GCF_000868925.1_ViralProj16630			Missing human host
V	(-)ssRNA	Monopartite	Paramyxoviridae	Morbillivirus	Measles morbillivirus	Measles morbillivirus	Viruses;Other;Paramyxoviridae	GCA_000854845.1	Complete	0.015894	47.4	human,vertebrates	8	273	1998-12-09T00:00:00Z	ftp://ftp.ncbi.nlm.nih.gov/genomes/all/GCF/000/854/845/GCF_000854845.1_ViralProj15025	Reference	NCBI, ViralZone
V	(-)ssRNA	Monopartite	Paramyxoviridae	Morbillivirus	Small ruminant morbillivirus	Peste des petits ruminants virus	Viruses;Other;Paramyxoviridae	GCA_000866445.1	Complete	0.015948	48.1	human,vertebrates	8	83	2004-10-15T00:00:00Z	ftp://ftp.ncbi.nlm.nih.gov/genomes/all/GCF/000/866/445/GCF_000866445.1_ViralProj15499
V	(-)ssRNA	Monopartite	Paramyxoviridae	Pararubulavirus	Menangle pararubulavirus	Menangle virus	Viruses;Other;Paramyxoviridae	GCA_000866025.1	Complete	0.015516	42.3	vertebrates	7		2001-06-14T00:00:00Z	ftp://ftp.ncbi.nlm.nih.gov/genomes/all/GCF/000/866/025/GCF_000866025.1_ViralProj16205			Missing human host
V	(-)ssRNA	Monopartite	Paramyxoviridae	Pararubulavirus	Sosuga virus	Sosuga virus	Viruses;Other;Paramyxoviridae	GCA_000924495.1	Complete	0.01548	42.4	human,vertebrates	7		2014-01-29T00:00:00Z	ftp://ftp.ncbi.nlm.nih.gov/genomes/all/GCF/000/924/495/GCF_000924495.1_ViralProj264896
V	(-)ssRNA	Monopartite	Paramyxoviridae	Respirovirus	Human respirovirus 1	Human parainfluenza virus 1 strain Washington/1964	Viruses;Other;Paramyxoviridae	GCA_000848705.1	Complete	0.0156	37.2	human,vertebrates	10	46	2002-03-15T00:00:00Z	ftp://ftp.ncbi.nlm.nih.gov/genomes/all/GCF/000/848/705/GCF_000848705.1_ViralProj14743
V	(-)ssRNA	Monopartite	Paramyxoviridae	Respirovirus	Human respirovirus 3	Human respirovirus 3	Viruses;Other;Paramyxoviridae	GCA_000850205.1	Complete	0.015462	34.5	human,vertebrates	8	386	1998-09-01T00:00:00Z	ftp://ftp.ncbi.nlm.nih.gov/genomes/all/GCF/000/850/205/GCF_000850205.1_ViralProj14706
V	(-)ssRNA	Monopartite	Paramyxoviridae	Rubulavirus	Human rubulavirus 2	Human rubulavirus 2	Viruses;Other;Paramyxoviridae	GCA_000863525.1	Complete	0.015646	38.4	human,vertebrates	7	58	1991-07-10T00:00:00Z	ftp://ftp.ncbi.nlm.nih.gov/genomes/all/GCF/000/863/525/GCF_000863525.1_ViralProj15421
V	(-)ssRNA	Monopartite	Paramyxoviridae	Rubulavirus	Human rubulavirus 4	Human parainfluenza virus 4a	Viruses;Other;Paramyxoviridae	GCA_000910675.1	Complete	0.017052	36.2	human	7	24	2010-07-17T00:00:00Z	ftp://ftp.ncbi.nlm.nih.gov/genomes/all/GCF/000/910/675/GCF_000910675.1_ViralProj214365
V	(-)ssRNA	Monopartite	Paramyxoviridae	Rubulavirus	Mammalian rubulavirus 5	Mammalian rubulavirus 5	Viruses;Other;Paramyxoviridae	GCA_000854805.1	Complete	0.015246	42.3	human,vertebrates	8	42	1998-03-21T00:00:00Z	ftp://ftp.ncbi.nlm.nih.gov/genomes/all/GCF/000/854/805/GCF_000854805.1_ViralProj15014
V	(-)ssRNA	Monopartite	Paramyxoviridae	Rubulavirus	Mumps rubulavirus	Mumps rubulavirus	Viruses;Other;Paramyxoviridae	GCA_000856685.1	Complete	0.015384	42.5	human,vertebrates	8	394	2000-04-11T00:00:00Z	ftp://ftp.ncbi.nlm.nih.gov/genomes/all/GCF/000/856/685/GCF_000856685.1_ViralProj15059	Reference	ViralZone
V	(-)ssRNA	Monopartite	Pneumoviridae	Metapneumovirus	Human metapneumovirus	Human metapneumovirus	Viruses;Other;Pneumoviridae	GCA_002815375.1	Complete	0.01335	36.3	human,vertebrates	9	159	2001-06-17T00:00:00Z	ftp://ftp.ncbi.nlm.nih.gov/genomes/all/GCF/002/815/375/GCF_002815375.1_ASM281537v1
V	(-)ssRNA	Monopartite	Pneumoviridae	Orthopneumovirus	Human orthopneumovirus	Human respiratory syncytial virus strain B1	Viruses;Other;Pneumoviridae	GCA_000855545.1	Complete	0.015225	33.6	human	11	2024	1997-11-02T00:00:00Z	ftp://ftp.ncbi.nlm.nih.gov/genomes/all/GCF/000/855/545/GCF_000855545.1_ViralProj15003	Reference	ViralZone
V	(-)ssRNA	Monopartite	Rhabdoviridae	Ledantevirus	Le Dantec virus	Le Dantec virus Strain: DakHD763	Viruses;Other;Rhabdoviridae	GCA_002118505.1	Complete	0.01145	37.8	human	6		2015-03-10T00:00:00Z	ftp://ftp.ncbi.nlm.nih.gov/genomes/all/GCF/002/118/505/GCF_002118505.1_ViralProj385649
V	(-)ssRNA	Monopartite	Rhabdoviridae	Lyssavirus	Australian bat lyssavirus	Australian bat lyssavirus	Viruses;Other;Rhabdoviridae	GCA_000850325.1	Complete	0.011822	44.2	human,vertebrates	5	13	1999-08-10T00:00:00Z	ftp://ftp.ncbi.nlm.nih.gov/genomes/all/GCF/000/850/325/GCF_000850325.1_ViralProj14730	Reference	ViralZone
V	(-)ssRNA	Monopartite	Rhabdoviridae	Lyssavirus	Duvenhage lyssavirus	Duvenhage lyssavirus	Viruses;Other;Rhabdoviridae	GCA_000905375.1	Complete	0.011976	44.2	human,vertebrates	5	3	2008-04-23T00:00:00Z	ftp://ftp.ncbi.nlm.nih.gov/genomes/all/GCF/000/905/375/GCF_000905375.1_ViralProj194144
V	(-)ssRNA	Monopartite	Rhabdoviridae	Lyssavirus	European bat 1 lyssavirus	European bat 1 lyssavirus	Viruses;Other;Rhabdoviridae	GCA_000870765.1	Complete	0.011966	44.6	vertebrates	5	94	2007-04-02T00:00:00Z	ftp://ftp.ncbi.nlm.nih.gov/genomes/all/GCF/000/870/765/GCF_000870765.1_ViralProj19757	Reference	ViralZone
V	(-)ssRNA	Monopartite	Rhabdoviridae	Lyssavirus	European bat 2 lyssavirus	European bat 2 lyssavirus isolate RV1333	Viruses;Other;Rhabdoviridae	GCA_000871625.2	Complete	0.01193	44.8	human,vertebrates	5	30	2007-04-02T00:00:00Z	ftp://ftp.ncbi.nlm.nih.gov/genomes/all/GCF/000/871/625/GCF_000871625.2_ViralProj19759	Reference	ViralZone
V	(-)ssRNA	Monopartite	Rhabdoviridae	Lyssavirus	Irkut lyssavirus	Irkut lyssavirus	Viruses;Other;Rhabdoviridae	GCA_000905355.1	Complete	0.01198	44.5	vertebrates	5	1	2008-06-01T00:00:00Z	ftp://ftp.ncbi.nlm.nih.gov/genomes/all/GCF/000/905/355/GCF_000905355.1_ViralProj194140			Missing human host
V	(-)ssRNA	Monopartite	Rhabdoviridae	Lyssavirus	Lagos bat lyssavirus	Lagos bat lyssavirus	Viruses;Other;Rhabdoviridae	GCA_000905975.1	Complete	0.012016	43.5	human,vertebrates	5	6	2008-04-23T00:00:00Z	ftp://ftp.ncbi.nlm.nih.gov/genomes/all/GCF/000/905/975/GCF_000905975.1_ViralProj194143
V	(-)ssRNA	Monopartite	Rhabdoviridae	Lyssavirus	Rabies lyssavirus	Rabies lyssavirus	Viruses;Other;Rhabdoviridae	GCA_000859625.1	Complete	0.011932	45.1	human,vertebrates	5	2133	1989-09-15T00:00:00Z	ftp://ftp.ncbi.nlm.nih.gov/genomes/all/GCF/000/859/625/GCF_000859625.1_ViralProj15144	Reference	ViralZone
V	(-)ssRNA	Monopartite	Rhabdoviridae	Tibrovirus	Ekpoma 2 tibrovirus	Ekpoma virus 2	Viruses;Other;Rhabdoviridae	GCA_002815875.1	Complete	0.012674	39.3	human	8		2015-02-18T00:00:00Z	ftp://ftp.ncbi.nlm.nih.gov/genomes/all/GCF/002/815/875/GCF_002815875.1_ASM281587v1
V	(-)ssRNA	Monopartite	Rhabdoviridae	Vesiculovirus	Chandipura virus	Chandipura virus	Viruses;Other;Rhabdoviridae	GCA_000906815.1	Complete	0.01112	42.5	human,invertebrates,vertebrates	5	10	2010-10-24T00:00:00Z	ftp://ftp.ncbi.nlm.nih.gov/genomes/all/GCF/000/906/815/GCF_000906815.1_ViralProj194137
V	(-)ssRNA	Monopartite	Rhabdoviridae	Vesiculovirus	Jurona vesiculovirus	Jurona vesiculovirus Strain: BeAr40578	Viruses;Other;Rhabdoviridae	GCA_002816015.1	Complete	0.011121	42	human,invertebrates	5	1	2015-03-10T00:00:00Z	ftp://ftp.ncbi.nlm.nih.gov/genomes/all/GCF/002/816/015/GCF_002816015.1_ASM281601v1
V	(-)ssRNA	Monopartite	Rhabdoviridae	Vesiculovirus	Vesicular stomatitis Indiana virus	Vesicular stomatitis Indiana virus	Viruses;Other;Rhabdoviridae	GCA_000850045.1	Complete	0.011161	41.7	vertebrates	6	54	1989-03-15T00:00:00Z	ftp://ftp.ncbi.nlm.nih.gov/genomes/all/GCF/000/850/045/GCF_000850045.1_ViralProj14673	Reference	ViralZone	Missing human host
V	(-)ssRNA	Segmented	Arenaviridae	Mammarenavirus	Argentinian mammarenavirus	Argentinian mammarenavirus	Viruses;Other;Arenaviridae	GCA_000856545.1	Complete	0.010525	41.5667	human,vertebrates	4	52	2003-08-24T00:00:00Z	ftp://ftp.ncbi.nlm.nih.gov/genomes/all/GCF/000/856/545/GCF_000856545.1_ViralMultiSegProj15028
V	(-)ssRNA	Segmented	Arenaviridae	Mammarenavirus	Brazilian mammarenavirus	Brazilian mammarenavirus	Viruses;Other;Arenaviridae	GCA_000855825.1	Complete	0.010499	39.6748	human	4	5	1996-08-06T00:00:00Z	ftp://ftp.ncbi.nlm.nih.gov/genomes/all/GCF/000/855/825/GCF_000855825.1_ViralMultiSegProj15054
V	(-)ssRNA	Segmented	Arenaviridae	Mammarenavirus	Chapare mammarenavirus	Chapare mammarenavirus	Viruses;Other;Arenaviridae	GCA_000879235.1	Complete	0.010464	40.0116	human	4		2008-04-02T00:00:00Z	ftp://ftp.ncbi.nlm.nih.gov/genomes/all/GCF/000/879/235/GCF_000879235.1_ViralMultiSegProj29223
V	(-)ssRNA	Segmented	Arenaviridae	Mammarenavirus	Flexal mammarenavirus	Flexal mammarenavirus	Viruses;Other;Arenaviridae	GCA_000872925.1	Complete	0.010448	41.8562		4	1	2002-10-02T00:00:00Z	ftp://ftp.ncbi.nlm.nih.gov/genomes/all/GCF/000/872/925/GCF_000872925.1_ViralMultiSegProj29903			Missing human host
V	(-)ssRNA	Segmented	Arenaviridae	Mammarenavirus	Guanarito mammarenavirus	Guanarito mammarenavirus	Viruses;Other;Arenaviridae	GCA_000853765.1	Complete	0.010424	40.6621	human,vertebrates	4	43	2002-09-25T00:00:00Z	ftp://ftp.ncbi.nlm.nih.gov/genomes/all/GCF/000/853/765/GCF_000853765.1_ViralMultiSegProj14939
V	(-)ssRNA	Segmented	Arenaviridae	Mammarenavirus	Lassa mammarenavirus	Lassa mammarenavirus	Viruses;Other;Arenaviridae	GCA_000851705.1	Complete	0.010681	42.0874	human,vertebrates	4	614	1989-06-15T00:00:00Z	ftp://ftp.ncbi.nlm.nih.gov/genomes/all/GCF/000/851/705/GCF_000851705.1_ViralMultiSegProj14864	Reference	ViralZone
V	(-)ssRNA	Segmented	Arenaviridae	Mammarenavirus	Lujo mammarenavirus	Lujo mammarenavirus	Viruses;Other;Arenaviridae	GCA_000885555.1	Complete	0.010352	42.3863	human	4	2	2009-06-04T00:00:00Z	ftp://ftp.ncbi.nlm.nih.gov/genomes/all/GCF/000/885/555/GCF_000885555.1_ViralMultiSegProj38405
V	(-)ssRNA	Segmented	Arenaviridae	Mammarenavirus	Lymphocytic choriomeningitis mammarenavirus	Lymphocytic choriomeningitis mammarenavirus	Viruses;Other;Arenaviridae	GCA_000851025.1	Complete	0.010056	42.3136	human,vertebrates	4	78	1989-06-15T00:00:00Z	ftp://ftp.ncbi.nlm.nih.gov/genomes/all/GCF/000/851/025/GCF_000851025.1_ViralMultiSegProj14862	Reference	ViralZone
V	(-)ssRNA	Segmented	Arenaviridae	Mammarenavirus	Machupo mammarenavirus	Machupo mammarenavirus	Viruses;Other;Arenaviridae	GCA_000853725.1	Complete	0.010635	41.7761	human,vertebrates	4	43	2002-09-25T00:00:00Z	ftp://ftp.ncbi.nlm.nih.gov/genomes/all/GCF/000/853/725/GCF_000853725.1_ViralMultiSegProj14931
V	(-)ssRNA	Segmented	Hantaviridae	Orthohantavirus	Andes orthohantavirus	Andes orthohantavirus	Viruses;Other;Hantaviridae	GCA_000850405.1	Complete	0.012104	38.5428	human,vertebrates	4	75	2000-10-10T00:00:00Z	ftp://ftp.ncbi.nlm.nih.gov/genomes/all/GCF/000/850/405/GCF_000850405.1_ViralMultiSegProj14746
V	(-)ssRNA	Segmented	Hantaviridae	Orthohantavirus	Bayou orthohantavirus	Bayou orthohantavirus	Viruses;Other;Hantaviridae	GCA_002816435.1	Complete	0.012189	39.4689	human,vertebrates	3		1995-01-27T00:00:00Z	ftp://ftp.ncbi.nlm.nih.gov/genomes/all/GCF/002/816/435/GCF_002816435.1_ASM281643v1
V	(-)ssRNA	Segmented	Hantaviridae	Orthohantavirus	Dobrava-Belgrade orthohantavirus	Dobrava-Belgrade orthohantavirus	Viruses;Other;Hantaviridae	GCA_000863045.1	Complete	0.01184	39.2026	human,vertebrates	3	69	2003-03-27T00:00:00Z	ftp://ftp.ncbi.nlm.nih.gov/genomes/all/GCF/000/863/045/GCF_000863045.1_ViralMultiSegProj15319
V	(-)ssRNA	Segmented	Hantaviridae	Orthohantavirus	Hantaan orthohantavirus	Hantaan orthohantavirus	Viruses;Other;Hantaviridae	GCA_000856085.1	Complete	0.011845	38.5469	human,vertebrates	3	566	1987-04-08T00:00:00Z	ftp://ftp.ncbi.nlm.nih.gov/genomes/all/GCF/000/856/085/GCF_000856085.1_ViralMultiSegProj14929	Reference	ViralZone
V	(-)ssRNA	Segmented	Hantaviridae	Orthohantavirus	Hantavirus Z10	Hantavirus Z10	Viruses;Other;Hantaviridae	GCA_000855785.1	Complete	0.01185	39.3134	human	3	2	1999-10-07T00:00:00Z	ftp://ftp.ncbi.nlm.nih.gov/genomes/all/GCF/000/855/785/GCF_000855785.1_ViralMultiSegProj15044
V	(-)ssRNA	Segmented	Hantaviridae	Orthohantavirus	Puumala orthohantavirus	Puumala orthohantavirus	Viruses;Other;Hantaviridae	GCA_000854405.1	Complete	0.012062	36.9773	human,vertebrates	3	166	1991-08-02T00:00:00Z	ftp://ftp.ncbi.nlm.nih.gov/genomes/all/GCF/000/854/405/GCF_000854405.1_ViralMultiSegProj14930
V	(-)ssRNA	Segmented	Hantaviridae	Orthohantavirus	Seoul orthohantavirus	Seoul virus 80-39	Viruses;Other;Hantaviridae	GCA_000855645.1	Complete	0.01195	38.9753	human,vertebrates	3	253	1991-07-23T00:00:00Z	ftp://ftp.ncbi.nlm.nih.gov/genomes/all/GCF/000/855/645/GCF_000855645.1_ViralMultiSegProj15027
V	(-)ssRNA	Segmented	Hantaviridae	Orthohantavirus	Sin Nombre orthohantavirus	Sin Nombre orthohantavirus	Viruses;Other;Hantaviridae	GCA_000854765.1	Complete	0.012317	38.3975	human,vertebrates	4	24	1994-01-19T00:00:00Z	ftp://ftp.ncbi.nlm.nih.gov/genomes/all/GCF/000/854/765/GCF_000854765.1_ViralMultiSegProj15005
V	(-)ssRNA	Segmented	Hantaviridae	Orthohantavirus	Tula orthohantavirus	Tula orthohantavirus	Viruses;Other;Hantaviridae	GCA_000855225.1	Complete	0.012066	38.0407	human,vertebrates	4	36	1995-11-20T00:00:00Z	ftp://ftp.ncbi.nlm.nih.gov/genomes/all/GCF/000/855/225/GCF_000855225.1_ViralMultiSegProj14936
V	(-)ssRNA	Segmented	Nairoviridae	Orthonairovirus	Burana orthonairovirus	Tacheng Tick Virus 1	Viruses;Other;Nairoviridae	GCA_001755105.1	Complete	0.019171	47.8497	human,invertebrates,vertebrates	3	3	2015-02-08T00:00:00Z	ftp://ftp.ncbi.nlm.nih.gov/genomes/all/GCF/001/755/105/GCF_001755105.1_ViralMultiSegProj344600
V	(-)ssRNA	Segmented	Nairoviridae	Orthonairovirus	Crimean-Congo hemorrhagic fever orthonairovirus	Crimean-Congo hemorrhagic fever orthonairovirus	Viruses;Other;Nairoviridae	GCA_000854165.1	Complete	0.019146	42.2463	human,invertebrates,vertebrates	3	498	1997-03-04T00:00:00Z	ftp://ftp.ncbi.nlm.nih.gov/genomes/all/GCF/000/854/165/GCF_000854165.1_ViralMultiSegProj15026
V	(-)ssRNA	Segmented	Nairoviridae	Orthonairovirus	Nairobi sheep disease virus	Nairobi sheep disease virus	Viruses;Other;Nairoviridae	GCA_002117695.1	Complete	0.018748	44.2028	human,invertebrates	3	26	2014-12-09T00:00:00Z	ftp://ftp.ncbi.nlm.nih.gov/genomes/all/GCF/002/117/695/GCF_002117695.1_ViralMultiSegProj384967
V	(-)ssRNA	Segmented	Orthomyxoviridae	Alphainfluenzavirus	Influenza A virus	Influenza A virus (A/New York/392/2004(H3N2))	Viruses;Other;Orthomyxoviridae	GCA_000865085.1	Complete	0.013627	42.9178	human,vertebrates	12	124	2005-08-01T00:00:00Z	ftp://ftp.ncbi.nlm.nih.gov/genomes/all/GCF/000/865/085/GCF_000865085.1_ViralMultiSegProj15622	Reference	NCBI
V	(-)ssRNA	Segmented	Orthomyxoviridae	Alphainfluenzavirus	Influenza A virus	Influenza A virus (A/Korea/426/1968(H2N2))	Viruses;Other;Orthomyxoviridae	GCA_000866645.1	Complete	0.01346	43.3652	human,vertebrates	12	124	1989-12-15T00:00:00Z	ftp://ftp.ncbi.nlm.nih.gov/genomes/all/GCF/000/866/645/GCF_000866645.1_ViralMultiSegProj15620	Reference	NCBI
V	(-)ssRNA	Segmented	Orthomyxoviridae	Alphainfluenzavirus	Influenza A virus	Influenza A virus (A/Shanghai/02/2013(H7N9))	Viruses;Other;Orthomyxoviridae	GCA_000928555.1	Complete	0.013191	44.3369	human,vertebrates	12	124	2013-05-15T00:00:00Z	ftp://ftp.ncbi.nlm.nih.gov/genomes/all/GCF/000/928/555/GCF_000928555.1_ViralMultiSegProj274585	Reference	NCBI
V	(-)ssRNA	Segmented	Orthomyxoviridae	Alphainfluenzavirus	Influenza A virus	Influenza A virus (A/California/07/2009(H1N1))	Viruses;Other;Orthomyxoviridae	GCA_001343785.1	Complete	0.013158	43.6638	human,vertebrates	11	124	2009-04-28T00:00:00Z	ftp://ftp.ncbi.nlm.nih.gov/genomes/all/GCF/001/343/785/GCF_001343785.1_ViralMultiSegProj274766	Reference	NCBI
V	(-)ssRNA	Segmented	Orthomyxoviridae	Alphainfluenzavirus	Influenza A virus	Influenza A virus (A/Puerto Rico/8/1934(H1N1))	Viruses;Other;Orthomyxoviridae	GCA_000865725.1	Complete	0.013588	43.381	human,vertebrates	12	124	1982-06-09T00:00:00Z	ftp://ftp.ncbi.nlm.nih.gov/genomes/all/GCF/000/865/725/GCF_000865725.1_ViralMultiSegProj15521	Reference	ViralZone
V	(-)ssRNA	Segmented	Orthomyxoviridae	Alphainfluenzavirus	Influenza A virus	Influenza A virus (A/Hong Kong/1073/99(H9N2))	Viruses;Other;Orthomyxoviridae	GCA_000851145.1	Complete	0.013498	44.0605	human,vertebrates	10	124	2000-06-30T00:00:00Z	ftp://ftp.ncbi.nlm.nih.gov/genomes/all/GCF/000/851/145/GCF_000851145.1_ViralMultiSegProj14892
V	(-)ssRNA	Segmented	Orthomyxoviridae	Alphainfluenzavirus	Influenza A virus	Influenza A virus (A/goose/Guangdong/1/1996(H5N1))	Viruses;Other;Orthomyxoviridae	GCA_000864105.1	Complete	0.01359	44.1255	human,vertebrates	12	124	1999-08-31T00:00:00Z	ftp://ftp.ncbi.nlm.nih.gov/genomes/all/GCF/000/864/105/GCF_000864105.1_ViralMultiSegProj15617	Reference	ViralZone
V	(-)ssRNA	Segmented	Orthomyxoviridae	Betainfluenzavirus	Influenza B virus	Influenza B virus (B/Lee/1940)	Viruses;Other;Orthomyxoviridae	GCA_000820495.2	Complete	0.014452	40.1517	human,vertebrates	10	9	1987-06-30T00:00:00Z	ftp://ftp.ncbi.nlm.nih.gov/genomes/all/GCF/000/820/495/GCF_000820495.2_ViralMultiSegProj14656
V	(-)ssRNA	Segmented	Orthomyxoviridae	Gammainfluenzavirus	Influenza C virus	Influenza C virus (C/Ann Arbor/1/50)	Viruses;Other;Orthomyxoviridae	GCA_000856665.2	Complete	0.012906	37.2985	human,vertebrates	9	1	2004-06-29T00:00:00Z	ftp://ftp.ncbi.nlm.nih.gov/genomes/all/GCF/000/856/665/GCF_000856665.10_ViralMultiSegProj15055	Reference	NCBI
V	(-)ssRNA	Segmented	Orthomyxoviridae	Thogotovirus	Thogoto thogotovirus	Thogoto thogotovirus	Viruses;Other;Orthomyxoviridae	GCA_000854245.1	Complete	0.010461	48.0266	invertebrates,vertebrates	7	10	1992-02-11T00:00:00Z	ftp://ftp.ncbi.nlm.nih.gov/genomes/all/GCF/000/854/245/GCF_000854245.1_ViralMultiSegProj15043			Missing human host
V	(-)ssRNA	Segmented	Peribunyaviridae	Orthobunyavirus	Batai orthobunyavirus	Batai virus	Viruses;Other;Peribunyaviridae	GCA_004789555.1	Complete	0.01227	33.7109	human,invertebrates,vertebrates	4	17	2012-12-09T00:00:00Z	ftp://ftp.ncbi.nlm.nih.gov/genomes/all/GCF/004/789/555/GCF_004789555.1_ASM478955v1
V	(-)ssRNA	Segmented	Peribunyaviridae	Orthobunyavirus	Bunyamwera orthobunyavirus	Bunyamwera virus	Viruses;Other;Peribunyaviridae	GCA_000849925.1	Complete	0.012294	35.1611	human,invertebrates,vertebrates	4	55	1988-09-30T00:00:00Z	ftp://ftp.ncbi.nlm.nih.gov/genomes/all/GCF/000/849/925/GCF_000849925.1_ViralMultiSegProj14649	Reference	ViralZone
V	(-)ssRNA	Segmented	Peribunyaviridae	Orthobunyavirus	Bwamba orthobunyavirus	Bwamba orthobunyavirus	Viruses;Other;Peribunyaviridae	GCA_002118905.1	Complete	0.012587	31.3468	human,invertebrates	4	3	2014-09-15T00:00:00Z	ftp://ftp.ncbi.nlm.nih.gov/genomes/all/GCF/002/118/905/GCF_002118905.1_ViralMultiSegProj385639
V	(-)ssRNA	Segmented	Peribunyaviridae	Orthobunyavirus	Cache Valley orthobunyavirus	Cache Valley virus	Viruses;Other;Peribunyaviridae	GCA_004789995.1	Complete	0.012283	35.4075	human,invertebrates,vertebrates	4	32	2017-07-27T00:00:00Z	ftp://ftp.ncbi.nlm.nih.gov/genomes/all/GCF/004/789/995/GCF_004789995.1_ASM478999v1
V	(-)ssRNA	Segmented	Peribunyaviridae	Orthobunyavirus	Caraparu orthobunyavirus	Caraparu virus	Viruses;Other;Peribunyaviridae	GCA_002118585.1	Complete	0.012259	35.0144	human,invertebrates,vertebrates	4	11	2014-03-03T00:00:00Z	ftp://ftp.ncbi.nlm.nih.gov/genomes/all/GCF/002/118/585/GCF_002118585.1_ViralMultiSegProj385630
V	(-)ssRNA	Segmented	Peribunyaviridae	Orthobunyavirus	Catu orthobunyavirus	Catu virus	Viruses;Other;Peribunyaviridae	GCA_002831305.1	Complete	0.012024	37.203	human	3		2015-12-01T00:00:00Z	ftp://ftp.ncbi.nlm.nih.gov/genomes/all/GCF/002/831/305/GCF_002831305.1_ASM283130v1
V	(-)ssRNA	Segmented	Peribunyaviridae	Orthobunyavirus	Fort Sherman orthobunyavirus	Fort Sherman virus	Viruses;Other;Peribunyaviridae	GCA_004789975.1	Complete	0.012294	34.8929	human,vertebrates	4	6	2017-07-27T00:00:00Z	ftp://ftp.ncbi.nlm.nih.gov/genomes/all/GCF/004/789/975/GCF_004789975.1_ASM478997v1
V	(-)ssRNA	Segmented	Peribunyaviridae	Orthobunyavirus	Guaroa orthobunyavirus	Guaroa virus	Viruses;Other;Peribunyaviridae	GCA_002118805.1	Complete	0.012265	34.0986	human	5	36	2015-04-19T00:00:00Z	ftp://ftp.ncbi.nlm.nih.gov/genomes/all/GCF/002/118/805/GCF_002118805.1_ViralMultiSegProj385632
V	(-)ssRNA	Segmented	Peribunyaviridae	Orthobunyavirus	Ilesha orthobunyavirus	Ilesha virus	Viruses;Other;Peribunyaviridae	GCA_004789595.1	Complete	0.012298	32.3485	human,invertebrates	4	7	2013-09-10T00:00:00Z	ftp://ftp.ncbi.nlm.nih.gov/genomes/all/GCF/004/789/595/GCF_004789595.1_ASM478959v1
V	(-)ssRNA	Segmented	Peribunyaviridae	Orthobunyavirus	Ingwavuma orthobunyavirus	Ingwavuma virus	Viruses;Other;Peribunyaviridae	GCA_004789635.1	Complete	0.012388	36.5842	human,vertebrates	3		2014-05-04T00:00:00Z	ftp://ftp.ncbi.nlm.nih.gov/genomes/all/GCF/004/789/635/GCF_004789635.1_ASM478963v1
V	(-)ssRNA	Segmented	Peribunyaviridae	Orthobunyavirus	Keystone orthobunyavirus	Keystone virus	Viruses;Other;Peribunyaviridae	GCA_004790075.1	Complete	0.012455	35.0889	human,invertebrates	4	16	2016-11-07T00:00:00Z	ftp://ftp.ncbi.nlm.nih.gov/genomes/all/GCF/004/790/075/GCF_004790075.1_ASM479007v1
V	(-)ssRNA	Segmented	Peribunyaviridae	Orthobunyavirus	La Crosse orthobunyavirus	La Crosse virus	Viruses;Other;Peribunyaviridae	GCA_000850965.1	Complete	0.012491	36.6648	human,invertebrates,vertebrates	4	87	2002-08-13T00:00:00Z	ftp://ftp.ncbi.nlm.nih.gov/genomes/all/GCF/000/850/965/GCF_000850965.1_ViralMultiSegProj14847	Reference	ViralZone
V	(-)ssRNA	Segmented	Peribunyaviridae	Orthobunyavirus	Madrid orthobunyavirus	Madrid virus	Viruses;Other;Peribunyaviridae	GCA_002118405.1	Complete	0.012604	34.2612	human,vertebrates	4	2	2014-03-03T00:00:00Z	ftp://ftp.ncbi.nlm.nih.gov/genomes/all/GCF/002/118/405/GCF_002118405.1_ViralMultiSegProj385629
V	(-)ssRNA	Segmented	Peribunyaviridae	Orthobunyavirus	Marituba orthobunyavirus	Marituba virus	Viruses;Other;Peribunyaviridae	GCA_002118745.1	Complete	0.012599	34.8702	human,invertebrates,vertebrates	4	12	2014-03-03T00:00:00Z	ftp://ftp.ncbi.nlm.nih.gov/genomes/all/GCF/002/118/745/GCF_002118745.1_ViralMultiSegProj385627
V	(-)ssRNA	Segmented	Peribunyaviridae	Orthobunyavirus	Melao orthobunyavirus	Melao virus	Viruses;Other;Peribunyaviridae	GCA_004790135.1	Complete	0.012424	34.5202	human,invertebrates	4	13	2016-11-07T00:00:00Z	ftp://ftp.ncbi.nlm.nih.gov/genomes/all/GCF/004/790/135/GCF_004790135.1_ASM479013v1
V	(-)ssRNA	Segmented	Peribunyaviridae	Orthobunyavirus	Oriboca orthobunyavirus	Oriboca virus	Viruses;Other;Peribunyaviridae	GCA_002118565.1	Complete	0.012259	35.3876	human,invertebrates,vertebrates	4	5	2014-03-03T00:00:00Z	ftp://ftp.ncbi.nlm.nih.gov/genomes/all/GCF/002/118/565/GCF_002118565.1_ViralMultiSegProj385626
V	(-)ssRNA	Segmented	Peribunyaviridae	Orthobunyavirus	Oropouche orthobunyavirus	Oropouche virus	Viruses;Other;Peribunyaviridae	GCA_000853785.1	Complete	0.011985	35.3854	human,invertebrates,vertebrates	4	177	2002-12-24T00:00:00Z	ftp://ftp.ncbi.nlm.nih.gov/genomes/all/GCF/000/853/785/GCF_000853785.1_ViralMultiSegProj14943
V	(-)ssRNA	Segmented	Peribunyaviridae	Orthobunyavirus	Tacaiuma orthobunyavirus	Tacaiuma orthobunyavirus	Viruses;Other;Peribunyaviridae	GCA_006298125.1	Complete	0.012162	37.0161	human,vertebrates	3		2018-01-01T00:00:00Z	ftp://ftp.ncbi.nlm.nih.gov/genomes/all/GCF/006/298/125/GCF_006298125.1_ASM629812v1
V	(-)ssRNA	Segmented	Peribunyaviridae	Orthobunyavirus	Tataguine orthobunyavirus	Tataguine virus	Viruses;Other;Peribunyaviridae	GCA_004789815.1	Complete	0.012052	35.0475	human,invertebrates	3		2015-12-01T00:00:00Z	ftp://ftp.ncbi.nlm.nih.gov/genomes/all/GCF/004/789/815/GCF_004789815.1_ASM478981v1
V	(-)ssRNA	Segmented	Peribunyaviridae	Orthobunyavirus	Tucunduba orthobunyavirus	Tucunduba virus	Viruses;Other;Peribunyaviridae	GCA_002029635.1	Complete	0.012323	31.8532	human,invertebrates	3		2017-03-07T00:00:00Z	ftp://ftp.ncbi.nlm.nih.gov/genomes/all/GCF/002/029/635/GCF_002029635.1_ViralMultiSegProj379134
V	(-)ssRNA	Segmented	Peribunyaviridae	Orthobunyavirus	Umbre orthobunyavirus	Umbre virus	Viruses;Other;Peribunyaviridae	GCA_002814435.1	Complete	0.012217	36.8804	human,invertebrates	4		2015-12-01T00:00:00Z	ftp://ftp.ncbi.nlm.nih.gov/genomes/all/GCF/002/814/435/GCF_002814435.1_ASM281443v1
V	(-)ssRNA	Segmented	Peribunyaviridae	Orthobunyavirus	Wyeomyia orthobunyavirus	Wyeomyia orthobunyavirus	Viruses;Other;Peribunyaviridae	GCA_002814455.1	Complete	0.012461	32.1305	human,invertebrates	3	14	2012-02-06T00:00:00Z	ftp://ftp.ncbi.nlm.nih.gov/genomes/all/GCF/002/814/455/GCF_002814455.1_ASM281445v1
V	(-)ssRNA	Segmented	Phenuiviridae	Bandavirus	Bhanja virus	Bhanja virus	Viruses;Other;Phenuiviridae	GCA_001019855.1	Complete	0.011511	45.3022	human,invertebrates	4	12	2013-01-21T00:00:00Z	ftp://ftp.ncbi.nlm.nih.gov/genomes/all/GCF/001/019/855/GCF_001019855.1_ViralMultiSegProj285593
V	(-)ssRNA	Segmented	Phenuiviridae	Bandavirus	Dabie bandavirus	Severe fever with thrombocytopenia syndrome virus	Viruses;Other;Phenuiviridae	GCA_003087855.1	Complete	0.011272	48.8407	human,invertebrates,vertebrates	4		2016-04-09T00:00:00Z	ftp://ftp.ncbi.nlm.nih.gov/genomes/all/GCF/003/087/855/GCF_003087855.1_ASM308785v1
V	(-)ssRNA	Segmented	Phenuiviridae	Bandavirus	Heartland bandavirus	Heartland virus	Viruses;Other;Phenuiviridae	GCA_000922255.1	Complete	0.011567	46.3289	human,invertebrates	4	6	2012-08-30T00:00:00Z	ftp://ftp.ncbi.nlm.nih.gov/genomes/all/GCF/000/922/255/GCF_000922255.1_ViralMultiSegProj255997
V	(-)ssRNA	Segmented	Phenuiviridae	Phlebovirus	Chandiru virus	Chandiru virus	Viruses;Other;Phenuiviridae	GCA_000891915.1	Complete	0.012495	39.5243	human,invertebrates,vertebrates	4	15	2011-04-02T00:00:00Z	ftp://ftp.ncbi.nlm.nih.gov/genomes/all/GCF/000/891/915/GCF_000891915.1_ViralMultiSegProj65423
V	(-)ssRNA	Segmented	Phenuiviridae	Phlebovirus	Naples phlebovirus	Toscana virus	Viruses;Other;Phenuiviridae	GCA_000854285.1	Complete	0.012488	44.5977	human,invertebrates,vertebrates	4	11	1991-03-11T00:00:00Z	ftp://ftp.ncbi.nlm.nih.gov/genomes/all/GCF/000/854/285/GCF_000854285.1_ViralMultiSegProj15053
V	(-)ssRNA	Segmented	Phenuiviridae	Phlebovirus	Punta Toro phlebovirus	Punta Toro virus	Viruses;Other;Phenuiviridae	GCA_002815115.1	Complete	0.012618	40.3507	human,invertebrates,vertebrates	4	47	2015-05-10T00:00:00Z	ftp://ftp.ncbi.nlm.nih.gov/genomes/all/GCF/002/815/115/GCF_002815115.1_ASM281511v1
V	(-)ssRNA	Segmented	Phenuiviridae	Phlebovirus	Rift Valley fever phlebovirus	Rift Valley fever virus	Viruses;Other;Phenuiviridae	GCA_000847345.1	Complete	0.011979	45.1243	human,invertebrates,vertebrates	4	516	2007-01-31T00:00:00Z	ftp://ftp.ncbi.nlm.nih.gov/genomes/all/GCF/000/847/345/GCF_000847345.1_ViralMultiSegProj14631	Reference	ViralZone
V	(-)ssRNA	Segmented	Phenuiviridae	Phlebovirus	SFTS phlebovirus	SFTS virus HB29	Viruses;Other;Phenuiviridae	GCA_000897355.1	Complete	0.01149	48.8164	human,invertebrates,vertebrates	4	329	2011-03-09T00:00:00Z	ftp://ftp.ncbi.nlm.nih.gov/genomes/all/GCF/000/897/355/GCF_000897355.1_ViralMultiSegProj170539
V	(-)ssRNA	Segmented	Phenuiviridae	Phlebovirus	Sicilian phlebovirus	Sandfly fever Turkey virus	Viruses;Other;Phenuiviridae	GCA_000891955.1	Complete	0.012603	43.6384	human,invertebrates	4	10	2010-08-02T00:00:00Z	ftp://ftp.ncbi.nlm.nih.gov/genomes/all/GCF/000/891/955/GCF_000891955.1_ViralMultiSegProj66185
V	(-)ssRNA	Segmented	Phenuiviridae	Uukuvirus	Uukuniemi virus	Uukuniemi virus	Viruses;Other;Phenuiviridae	GCA_000851865.1	Complete	0.011372	47.719	invertebrates	5	8	1992-11-24T00:00:00Z	ftp://ftp.ncbi.nlm.nih.gov/genomes/all/GCF/000/851/865/GCF_000851865.1_ViralMultiSegProj14902	Reference	ViralZone	Missing human host

## Sheet: Excluded_ssRNA
#Organism Name	Organism Groups	Assembly	Level	Size(Mb)	GC%	Host	CDS	Neighbors	Release Date	RefSeq FTP	Obs.	Reason for Exclusion
Avian nephritis virus 1	Viruses;Other;Astroviridae	GCA_000852205.1	Complete	0.006927	46.3	human,vertebrates	2	6	2000-03-22T00:00:00Z	ftp://ftp.ncbi.nlm.nih.gov/genomes/all/GCF/000/852/205/GCF_000852205.1_ViralProj14804		Not human
Infectious bronchitis virus	Viruses;Other;Coronaviridae	GCA_000862965.1	Complete	0.027608	37.9	human,vertebrates	10	425	1993-06-12T00:00:00Z	ftp://ftp.ncbi.nlm.nih.gov/genomes/all/GCF/000/862/965/GCF_000862965.1_ViralProj15303		Not human
Duck coronavirus	Viruses;Other;Coronaviridae	GCA_012271565.1	Complete	0.027754	39.3	human,vertebrates	12	425	2015-05-09T00:00:00Z	ftp://ftp.ncbi.nlm.nih.gov/genomes/all/GCF/012/271/565/GCF_012271565.1_ASM1227156v1		Not human
Infectious bronchitis virus	Viruses;Other;Coronaviridae	GCA_012271575.1	Complete	0.027464	38	human,vertebrates	10	425	2015-08-16T00:00:00Z	ftp://ftp.ncbi.nlm.nih.gov/genomes/all/GCF/012/271/575/GCF_012271575.1_ASM1227157v1		Not human
Turkey coronavirus	Viruses;Other;Coronaviridae	GCA_000880055.1	Complete	0.027657	38.3	human,vertebrates	11	425	2008-05-29T00:00:00Z	ftp://ftp.ncbi.nlm.nih.gov/genomes/all/GCF/000/880/055/GCF_000880055.1_ViralProj30039		Not human
Bovine coronavirus	Viruses;Other;Coronaviridae	GCA_000862505.1	Complete	0.031028	37.1	human,vertebrates	12	309	2001-08-02T00:00:00Z	ftp://ftp.ncbi.nlm.nih.gov/genomes/all/GCF/000/862/505/GCF_000862505.1_ViralProj15385		Not human
Bovine viral diarrhea virus 1-NADL	Viruses;Other;Flaviviridae	GCA_000861245.1	Complete	0.012573	45.8	human,vertebrates	1	99	1990-03-15T00:00:00Z	ftp://ftp.ncbi.nlm.nih.gov/genomes/all/GCF/000/861/245/GCF_000861245.1_ViralProj15305		Not human
Bovine viral diarrhea virus 2	Viruses;Other;Flaviviridae	GCA_003029635.1	Complete	0.012513	45.4	human,vertebrates	1	101	1995-06-02T00:00:00Z	ftp://ftp.ncbi.nlm.nih.gov/genomes/all/GCF/003/029/635/GCF_003029635.1_ASM302963v1		Not human
Bovine viral diarrhea virus 2 C413	Viruses;Other;Flaviviridae	GCA_000855985.1	Complete	0.012255	45.1	human,vertebrates	1		1997-06-11T00:00:00Z	ftp://ftp.ncbi.nlm.nih.gov/genomes/all/GCF/000/855/985/GCF_000855985.1_ViralProj15089		Not human
Camel alphacoronavirus	Viruses;Other;Coronaviridae	GCA_001500975.1	Complete	0.027395	38.4	human,vertebrates	7	70	2015-12-17T00:00:00Z	ftp://ftp.ncbi.nlm.nih.gov/genomes/all/GCF/001/500/975/GCF_001500975.1_ViralProj306529		Not human
Norovirus dog/GVI.1/HKU_Ca026F/2007/HKG	Viruses;Other;Caliciviridae	GCA_007609015.1	Complete	0.007637	56.4	human,vertebrates	3	1519	2012-08-18T00:00:00Z	ftp://ftp.ncbi.nlm.nih.gov/genomes/all/GCF/007/609/015/GCF_007609015.1_ASM760901v1		Not human
Norovirus cat/GIV.2/CU081210E/USA/2010	Viruses;Other;Caliciviridae	GCA_010478905.1	Complete	0.007839	58.5	human,vertebrates	3	1519	2012-03-19T00:00:00Z	ftp://ftp.ncbi.nlm.nih.gov/genomes/all/GCF/010/478/905/GCF_010478905.1_ASM1047890v1		Not human
Murine norovirus 1	Viruses;Other;Caliciviridae	GCA_000868425.1	Complete	0.007382	56.7	human,vertebrates	4	1519	2005-12-04T00:00:00Z	ftp://ftp.ncbi.nlm.nih.gov/genomes/all/GCF/000/868/425/GCF_000868425.1_ViralProj17577		Not human
Mamastrovirus 3	Viruses;Other;Astroviridae	GCA_000927095.1	Complete	0.006706	47.8	human,vertebrates	2	5	2014-02-08T00:00:00Z	ftp://ftp.ncbi.nlm.nih.gov/genomes/all/GCF/000/927/095/GCF_000927095.1_ViralProj264920		Not human
Vesicular exanthema of swine virus	Viruses;Other;Caliciviridae	GCA_000847705.1	Complete	0.008284	47.8	human,vertebrates	3	4	1997-03-03T00:00:00Z	ftp://ftp.ncbi.nlm.nih.gov/genomes/all/GCF/000/847/705/GCF_000847705.1_ViralProj14704		Not human
Walrus calicivirus	Viruses;Other;Caliciviridae	GCA_000852525.1	Complete	0.008289	48.2	human,vertebrates	3	4	2000-12-26T00:00:00Z	ftp://ftp.ncbi.nlm.nih.gov/genomes/all/GCF/000/852/525/GCF_000852525.1_ViralProj14874		Not human
Porcine enterovirus 9	Viruses;Other;Picornaviridae	GCA_000863405.1	Complete	0.007388	45.7	human,vertebrates	1	93	2002-04-02T00:00:00Z	ftp://ftp.ncbi.nlm.nih.gov/genomes/all/GCF/000/863/405/GCF_000863405.1_ViralProj15396		Not human
Simian Agent 10	Viruses;Other;Paramyxoviridae	GCA_002815255.1	Complete	0.015462	34.9	human,vertebrates	8	386	2010-11-29T00:00:00Z	ftp://ftp.ncbi.nlm.nih.gov/genomes/all/GCF/002/815/255/GCF_002815255.1_ASM281525v1		Representative: GCA_000850205.1
Porcine enteric sapovirus	Viruses;Other;Caliciviridae	GCA_000849945.1	Complete	0.00732	53.5	human,vertebrates	2	162	1999-10-31T00:00:00Z	ftp://ftp.ncbi.nlm.nih.gov/genomes/all/GCF/000/849/945/GCF_000849945.1_ViralProj14653		Representative: GCA_000854265.1
Sapovirus C12	Viruses;Other;Caliciviridae	GCA_000855765.1	Complete	0.007476	51.7	human,vertebrates	2	162	2004-09-23T00:00:00Z	ftp://ftp.ncbi.nlm.nih.gov/genomes/all/GCF/000/855/765/GCF_000855765.1_ViralProj15040		Representative: GCA_000854265.1
Sapovirus Hu/Nagoya/NGY-1/2012/JPN	Viruses;Other;Caliciviridae	GCA_001008475.1	Complete	0.007521	49.7	human,vertebrates	2	162	2013-07-09T00:00:00Z	ftp://ftp.ncbi.nlm.nih.gov/genomes/all/GCF/001/008/475/GCF_001008475.1_ViralProj284012		Representative: GCA_000854265.1
Sapovirus Mc10	Viruses;Other;Caliciviridae	GCA_000853825.1	Complete	0.007458	51.5	human,vertebrates	2	162	2004-02-26T00:00:00Z	ftp://ftp.ncbi.nlm.nih.gov/genomes/all/GCF/000/853/825/GCF_000853825.1_ViralProj14952		Representative: GCA_000854265.1
Human orthopneumovirus	Viruses;Other;Pneumoviridae	GCA_002815475.1	Complete	0.015222	33.2	human	11	2024	1991-12-10T00:00:00Z	ftp://ftp.ncbi.nlm.nih.gov/genomes/all/GCF/002/815/475/GCF_002815475.1_ASM281547v1		Representative: GCA_000855545.1
Respiratory syncytial virus	Viruses;Other;Pneumoviridae	GCA_000856445.1	Complete	0.015191	33.2	human,vertebrates	10	24	1997-03-28T00:00:00Z	ftp://ftp.ncbi.nlm.nih.gov/genomes/all/GCF/000/856/445/GCF_000856445.1_ViralProj15004		Representative: GCA_000856445.1
West Nile virus	Viruses;Other;Flaviviridae	GCA_000875385.1	Complete	0.011029	51.2	human,invertebrates,vertebrates	3	1886	2005-10-11T00:00:00Z	ftp://ftp.ncbi.nlm.nih.gov/genomes/all/GCF/000/875/385/GCF_000875385.1_ViralProj30293		Representative: GCA_000861085.1
Hepatitis E virus rat/R63/DEU/2009	Viruses;Other;Hepeviridae	GCA_002826445.1	Complete	0.006965	57.6	human,vertebrates	6	13	2010-08-30T00:00:00Z	ftp://ftp.ncbi.nlm.nih.gov/genomes/all/GCF/002/826/445/GCF_002826445.1_ASM282644v1		Representative: GCA_000861105.1
Human TMEV-like cardiovirus	Viruses;Other;Picornaviridae	GCA_000875265.1	Complete	0.007961	43.6	human,vertebrates	2	55	2008-05-31T00:00:00Z	ftp://ftp.ncbi.nlm.nih.gov/genomes/all/GCF/000/875/265/GCF_000875265.1_ViralProj30053		Representative: GCA_000861185.1
Human rhinovirus B3	Viruses;Other;Picornaviridae	GCA_002816855.1	Complete	0.007208	39.9	human	1	70	2007-05-07T00:00:00Z	ftp://ftp.ncbi.nlm.nih.gov/genomes/all/GCF/002/816/855/GCF_002816855.1_ASM281685v1		Representative: GCA_000861265.1
Human parechovirus 1	Viruses;Other;Picornaviridae	GCA_002817305.1	Complete	0.007339	39.1	human,vertebrates	1	193	1993-05-08T00:00:00Z	ftp://ftp.ncbi.nlm.nih.gov/genomes/all/GCF/002/817/305/GCF_002817305.1_ASM281730v1		Representative: GCA_000861505.1
Hepatitis C virus (isolate H77)	Viruses;Other;Flaviviridae	GCA_002820805.1	Complete	0.009599	58.4	human,vertebrates	2	2287	1997-08-15T00:00:00Z	ftp://ftp.ncbi.nlm.nih.gov/genomes/all/GCF/002/820/805/GCF_002820805.1_ASM282080v1		Representative: GCA_000861845.1
Coxsackievirus A2	Viruses;Other;Picornaviridae	GCA_002816655.1	Complete	0.007398	48.3	human,vertebrates	1	2264	2004-05-28T00:00:00Z	ftp://ftp.ncbi.nlm.nih.gov/genomes/all/GCF/002/816/655/GCF_002816655.1_ASM281665v1		Representative: GCA_000861905.1
enterovirus A114	Viruses;Other;Picornaviridae	GCA_001684625.1	Complete	0.007317	47.5	human,vertebrates	1	4	2016-07-02T00:00:00Z	ftp://ftp.ncbi.nlm.nih.gov/genomes/all/GCF/001/684/625/GCF_001684625.1_ViralProj328671		Representative: GCA_000861905.1
Human rhinovirus A1	Viruses;Other;Picornaviridae	GCA_002816835.1	Complete	0.007137	37.5	human,vertebrates	1	200	2009-02-13T00:00:00Z	ftp://ftp.ncbi.nlm.nih.gov/genomes/all/GCF/002/816/835/GCF_002816835.1_ASM281683v1		Representative: GCA_000862245.1
Norovirus GI	Viruses;Other;Caliciviridae	GCA_008703965.1	Complete	0.007677	49.9	human,vertebrates	3	1519	2019-04-02T00:00:00Z	ftp://ftp.ncbi.nlm.nih.gov/genomes/all/GCF/008/703/965/GCF_008703965.1_ASM870396v1		Representative: GCA_000864005.1
Norovirus GI	Viruses;Other;Caliciviridae	GCA_008704025.1	Complete	0.007734	48.4	human,vertebrates	3	1519	2018-04-08T00:00:00Z	ftp://ftp.ncbi.nlm.nih.gov/genomes/all/GCF/008/704/025/GCF_008704025.1_ASM870402v1		Representative: GCA_000864005.1
Norovirus GI/Hu/JP/2007/GI.P3_GI.3/Shimizu/KK2866	Viruses;Other;Caliciviridae	GCA_003813225.1	Complete	0.007745	48.6	human,vertebrates	3	1519	2014-08-10T00:00:00Z	ftp://ftp.ncbi.nlm.nih.gov/genomes/all/GCF/003/813/225/GCF_003813225.1_ASM381322v1		Representative: GCA_000864005.1
Norovirus GII	Viruses;Other;Caliciviridae	GCA_003638685.1	Complete	0.007567	48.6	human,vertebrates	3	1519	2018-06-11T00:00:00Z	ftp://ftp.ncbi.nlm.nih.gov/genomes/all/GCF/003/638/685/GCF_003638685.1_ASM363868v1		Representative: GCA_000864005.1
Norovirus GII	Viruses;Other;Caliciviridae	GCA_004193815.1	Complete	0.007521	50.3	human,vertebrates	3	1519	2018-06-11T00:00:00Z	ftp://ftp.ncbi.nlm.nih.gov/genomes/all/GCF/004/193/815/GCF_004193815.1_ASM419381v1		Representative: GCA_000864005.1
Norovirus GII	Viruses;Other;Caliciviridae	GCA_008711635.1	Complete	0.007525	47.7	human,vertebrates	3	1519	2018-02-07T00:00:00Z	ftp://ftp.ncbi.nlm.nih.gov/genomes/all/GCF/008/711/635/GCF_008711635.1_ASM871163v1		Representative: GCA_000864005.1
Norovirus GII.17	Viruses;Other;Caliciviridae	GCA_003638645.1	Complete	0.007556	48.1	human,vertebrates	3	1519	2016-05-10T00:00:00Z	ftp://ftp.ncbi.nlm.nih.gov/genomes/all/GCF/003/638/645/GCF_003638645.1_ASM363864v1		Representative: GCA_000864005.1
Norovirus GII.2	Viruses;Other;Caliciviridae	GCA_003638665.1	Complete	0.007536	48.7	human,vertebrates	3	1519	2017-06-07T00:00:00Z	ftp://ftp.ncbi.nlm.nih.gov/genomes/all/GCF/003/638/665/GCF_003638665.1_ASM363866v1		Representative: GCA_000864005.1
Norovirus GII/Hu/JP/2007/GII.P15_GII.15/Sapporo/HK299	Viruses;Other;Caliciviridae	GCA_007608995.1	Complete	0.007551	49.2	human,vertebrates	3	1519	2014-08-10T00:00:00Z	ftp://ftp.ncbi.nlm.nih.gov/genomes/all/GCF/007/608/995/GCF_007608995.1_ASM760899v1		Representative: GCA_000864005.1
Norovirus GII/Hu/JP/2011/GII/Yuzawa/Gira2HS	Viruses;Other;Caliciviridae	GCA_007609035.1	Complete	0.007543	48.6	human,vertebrates	3	1519	2014-08-10T00:00:00Z	ftp://ftp.ncbi.nlm.nih.gov/genomes/all/GCF/007/609/035/GCF_007609035.1_ASM760903v1		Representative: GCA_000864005.1
Norovirus GIII	Viruses;Other;Caliciviridae	GCA_001595675.1	Complete	0.007313	57.1	human,vertebrates	3	1519	2012-08-25T00:00:00Z	ftp://ftp.ncbi.nlm.nih.gov/genomes/all/GCF/001/595/675/GCF_001595675.1_ViralProj315135		Representative: GCA_000864005.1
Norovirus Hu/GIV.1/LakeMacquarie/NSW268O/2010/AU	Viruses;Other;Caliciviridae	GCA_001595715.1	Complete	0.007527	50.7	human,vertebrates	3	1519	2012-05-13T00:00:00Z	ftp://ftp.ncbi.nlm.nih.gov/genomes/all/GCF/001/595/715/GCF_001595715.1_ViralProj315150		Representative: GCA_000864005.1
Norovirus Hu/USA/2016/GIV.3/WI7002	Viruses;Other;Caliciviridae	GCA_008704005.1	Complete	0.007419	51.1	human,vertebrates	3	1519	2016-11-07T00:00:00Z	ftp://ftp.ncbi.nlm.nih.gov/genomes/all/GCF/008/704/005/GCF_008704005.1_ASM870400v1		Representative: GCA_000864005.1
Norwalk-like virus	Viruses;Other;Caliciviridae	GCA_001595695.1	Complete	0.007518	50	human,vertebrates	3	1519	2000-06-08T00:00:00Z	ftp://ftp.ncbi.nlm.nih.gov/genomes/all/GCF/001/595/695/GCF_001595695.1_ViralProj315113		Representative: GCA_000864005.1
Norwalk-like virus	Viruses;Other;Caliciviridae	GCA_008703985.1	Complete	0.007693	49.6	human,vertebrates	3	1519	2002-09-04T00:00:00Z	ftp://ftp.ncbi.nlm.nih.gov/genomes/all/GCF/008/703/985/GCF_008703985.1_ASM870398v1		Representative: GCA_000864005.1
Human rhinovirus NAT001	Viruses;Other;Picornaviridae	GCA_002816885.1	Complete	0.006944	43.4	human,vertebrates	1	81	2007-08-23T00:00:00Z	ftp://ftp.ncbi.nlm.nih.gov/genomes/all/GCF/002/816/885/GCF_002816885.1_ASM281688v1		Representative: GCA_000872325.1
Zika virus	Viruses;Other;Flaviviridae	GCA_002366285.1	Complete	0.010808	51.3	human,invertebrates,vertebrates	1	767	2016-02-11T00:00:00Z	ftp://ftp.ncbi.nlm.nih.gov/genomes/all/GCF/002/366/285/GCF_002366285.1_ViralProj411812		Representative: GCA_000882815.1
Salivirus A	Viruses;Other;Picornaviridae	GCA_000885035.1	Complete	0.007989	56.7	human,vertebrates	1	9	2009-07-04T00:00:00Z	ftp://ftp.ncbi.nlm.nih.gov/genomes/all/GCF/000/885/035/GCF_000885035.1_ViralProj39553		Representative: GCA_000886535.1
Salivirus FHB	Viruses;Other;Picornaviridae	GCA_000926235.1	Complete	0.007998	57.2	human	1		2014-09-24T00:00:00Z	ftp://ftp.ncbi.nlm.nih.gov/genomes/all/GCF/000/926/235/GCF_000926235.1_ViralProj262543		Representative: GCA_000886535.1
Rosavirus M-7	Viruses;Other;Picornaviridae	GCA_002817335.1	Complete	0.008749	52.2	human,vertebrates	1		2011-08-15T00:00:00Z	ftp://ftp.ncbi.nlm.nih.gov/genomes/all/GCF/002/817/335/GCF_002817335.1_ASM281733v1		Representative: GCA_000918175.1
Variegated squirrel bornavirus 1	Viruses;Other;Bornaviridae	GCA_002153825.1	Complete	0.008786	42.9	human,vertebrates	6		2016-09-30T00:00:00Z	ftp://ftp.ncbi.nlm.nih.gov/genomes/all/GCF/002/153/825/GCF_002153825.1_ViralProj353928	RefSeq entry suppressed	Representative: GCA_001698295.1
Punta Toro virus	Viruses;Other;Phenuiviridae	GCA_001021295.1	Complete	0.01265	39.5204	human,invertebrates,vertebrates	4		2015-05-10T00:00:00Z	ftp://ftp.ncbi.nlm.nih.gov/genomes/all/GCF/001/021/295/GCF_001021295.1_ViralMultiSegProj286006	RefSeq entry suppressed	Representative: GCA_002815115.1
Human metapneumovirus	Viruses;Other;Pneumoviridae	GCA_000865625.1	Complete	0.013335	36.4	human,vertebrates	9		2003-10-06T00:00:00Z	ftp://ftp.ncbi.nlm.nih.gov/genomes/all/GCF/000/865/625/GCF_000865625.1_ViralProj15498	RefSeq entry suppressed	Representative: GCA_002815375.1
Jurona vesiculovirus	Viruses;Other;Rhabdoviridae	GCA_000926635.1	Complete	0.011121	42	human,invertebrates	5		2012-05-03T00:00:00Z	ftp://ftp.ncbi.nlm.nih.gov/genomes/all/GCF/000/926/635/GCF_000926635.1_ViralProj265901	RefSeq entry suppressed	Representative: GCA_002816015.1
Coxsackievirus B1	Viruses;Other;Picornaviridae	GCA_000861325.1	Complete	0.007389	47.2	human,vertebrates	1	709	1989-06-15T00:00:00Z	ftp://ftp.ncbi.nlm.nih.gov/genomes/all/GCF/000/861/325/GCF_000861325.1_ViralProj15321		Representative: GCA_002816685.1
Cosavirus JMY-2014	Viruses;Other;Picornaviridae	GCA_000930055.1	Complete	0.007213	42.2	human	1		2014-12-16T00:00:00Z	ftp://ftp.ncbi.nlm.nih.gov/genomes/all/GCF/000/930/055/GCF_000930055.1_ViralProj271106		unclassified Cosavirus
Human cosavirus	Viruses;Other;Picornaviridae	GCA_000920655.1	Complete	0.007802	43.5	human	1	2	2014-04-08T00:00:00Z	ftp://ftp.ncbi.nlm.nih.gov/genomes/all/GCF/000/920/655/GCF_000920655.1_ViralProj244478		unclassified Cosavirus
unidentified human coronavirus	Viruses;Other;Coronaviridae	GCA_002889935.1	Complete	0.004068	35.6	human	1		2017-12-20T00:00:00Z	ftp://ftp.ncbi.nlm.nih.gov/genomes/all/GCF/002/889/935/GCF_002889935.1_ASM288993v1		Unidentified
Hepatitis C virus (isolate EUH1480) Genotype: 5	Viruses;Other;Flaviviridae	GCA_000873605.1	Complete*	0.009343	57.1	human,vertebrates	2	2287	1997-09-12T00:00:00Z	ftp://ftp.ncbi.nlm.nih.gov/genomes/all/GCF/000/873/605/GCF_000873605.1_ViralProj20935		Genome incomplete (manual verification)
Hepatitis C virus (isolate NZL1) Genotype: 3	Viruses;Other;Flaviviridae	GCA_000874285.1	Complete*	0.009456	55.6	human,vertebrates	2	2287	1994-07-21T00:00:00Z	ftp://ftp.ncbi.nlm.nih.gov/genomes/all/GCF/000/874/285/GCF_000874285.1_ViralProj20941		Genome incomplete (manual verification)
Hepatitis C virus ED43 Genotype: 4	Viruses;Other;Flaviviridae	GCA_000874265.1	Complete*	0.009355	56.2	human,vertebrates	2	2287	1997-07-09T00:00:00Z	ftp://ftp.ncbi.nlm.nih.gov/genomes/all/GCF/000/874/265/GCF_000874265.1_ViralProj20933		Genome incomplete (manual verification)
