# Supplementary material for: Investigating the Human Host—ssRNA Virus Interaction Landscape Using the SMEAGOL Toolbox
Source: Viruses. 2022 Jun 29;14(7):1436. doi: 10.3390/v14071436 (PMC9317827; doi:10.3390/v14071436)
Supplement: Supplementary file 1 [file viruses-14-01436-s001.zip › Supp_Data_S3_genome_enrichment_results.xlsx]

## Sheet: Supp_Data_2_genome_enrichment_r
Matrix ID	Matrix Width	Real sites	Number of background sequences	Average number of sites in background sequences	S.D. of number of sites in background sequences	p	fdr	assembly	group	RBP	family	description	sense
encode_RBM45_2	5	27	1000	10.833	3.20802	2.49929e-05	0.00904745	GCF_000847425.1	IV	RBM45	Flaviviridae	NC_001837.1 Hepatitis GB virus A	+
encode_RBM45_2	5	12	1000	13.608	3.59267	0.786019	1	GCF_000847425.1	IV	RBM45	Flaviviridae	NC_001837.1 Hepatitis GB virus A	-
s27	6	23	1000	10.556	3.19015	0.000905639	0.10928	GCF_000847425.1	IV	NOVA1	Flaviviridae	NC_001837.1 Hepatitis GB virus A	+
s27	6	41	1000	27.985	5.15532	0.0176679	0.71904	GCF_000847425.1	IV	NOVA1	Flaviviridae	NC_001837.1 Hepatitis GB virus A	-
s28	6	23	1000	10.556	3.19015	0.000905639	0.10928	GCF_000847425.1	IV	NOVA2	Flaviviridae	NC_001837.1 Hepatitis GB virus A	+
s28	6	41	1000	27.985	5.15532	0.0176679	0.71904	GCF_000847425.1	IV	NOVA2	Flaviviridae	NC_001837.1 Hepatitis GB virus A	-
M145_0.6	7	10	1000	3.065	1.79555	0.00128688	0.116463	GCF_000847425.1	IV	RBM5	Flaviviridae	NC_001837.1 Hepatitis GB virus A	+
M145_0.6	7	1	1000	3.027	1.74852	0.384372	1	GCF_000847425.1	IV	RBM5	Flaviviridae	NC_001837.1 Hepatitis GB virus A	-
encode_ESRP1_1	6	72	1000	49.094	7.39174	0.00200642	0.121054	GCF_000847425.1	IV	ESRP1	Flaviviridae	NC_001837.1 Hepatitis GB virus A	+
encode_ESRP1_1	6	21	1000	17.552	4.23074	0.400924	1	GCF_000847425.1	IV	ESRP1	Flaviviridae	NC_001837.1 Hepatitis GB virus A	-
encode_MBNL1_1	5	61	1000	40.147	5.97872	0.00194266	0.121054	GCF_000847425.1	IV	MBNL1	Flaviviridae	NC_001837.1 Hepatitis GB virus A	+
encode_MBNL1_1	5	19	1000	23.282	4.36664	0.46612	1	GCF_000847425.1	IV	MBNL1	Flaviviridae	NC_001837.1 Hepatitis GB virus A	-
M053_0.6	7	7	1000	2.249	1.5249	0.00834472	0.431541	GCF_000847425.1	IV	RBM5	Flaviviridae	NC_001837.1 Hepatitis GB virus A	+
M053_0.6	7	1	1000	2.082	1.44961	0.729744	1	GCF_000847425.1	IV	RBM5	Flaviviridae	NC_001837.1 Hepatitis GB virus A	-
encode_NOVA1_1	5	30	1000	18.257	3.98709	0.00953963	0.431668	GCF_000847425.1	IV	NOVA1	Flaviviridae	NC_001837.1 Hepatitis GB virus A	+
encode_NOVA1_1	5	27	1000	28.899	5.06621	0.851811	1	GCF_000847425.1	IV	NOVA1	Flaviviridae	NC_001837.1 Hepatitis GB virus A	-
325	7	58	1000	41.274	6.07633	0.0123054	0.433107	GCF_000847425.1	IV	SRSF1	Flaviviridae	NC_001837.1 Hepatitis GB virus A	+
325	7	30	1000	20.441	4.62536	0.0448424	0.71904	GCF_000847425.1	IV	SRSF1	Flaviviridae	NC_001837.1 Hepatitis GB virus A	-
75	6	16	1000	28.036	7.06984	0.0224773	0.433107	GCF_000847425.1	IV	PPIE	Flaviviridae	NC_001837.1 Hepatitis GB virus A	+
75	6	16	1000	28.036	7.06984	0.0224773	0.71904	GCF_000847425.1	IV	PPIE	Flaviviridae	NC_001837.1 Hepatitis GB virus A	-
M048_0.6	7	5	1000	1.56	1.22061	0.0215324	0.433107	GCF_000847425.1	IV	RBM3	Flaviviridae	NC_001837.1 Hepatitis GB virus A	+
M048_0.6	7	2	1000	1.534	1.19343	0.669148	1	GCF_000847425.1	IV	RBM3	Flaviviridae	NC_001837.1 Hepatitis GB virus A	-
M065_0.6	7	22	1000	13.064	3.55085	0.024991	0.433107	GCF_000847425.1	IV	SRSF9	Flaviviridae	NC_001837.1 Hepatitis GB virus A	+
M065_0.6	7	5	1000	8.744	2.98016	0.304817	1	GCF_000847425.1	IV	SRSF9	Flaviviridae	NC_001837.1 Hepatitis GB virus A	-
M083_0.6	7	7	1000	2.736	1.59463	0.0218825	0.433107	GCF_000847425.1	IV	ZC3H10	Flaviviridae	NC_001837.1 Hepatitis GB virus A	+
M083_0.6	7	8	1000	4.452	2.07702	0.0942813	0.915223	GCF_000847425.1	IV	ZC3H10	Flaviviridae	NC_001837.1 Hepatitis GB virus A	-
M151_0.6	7	12	1000	5.5	2.30159	0.0150458	0.433107	GCF_000847425.1	IV	HNRNPH2	Flaviviridae	NC_001837.1 Hepatitis GB virus A	+
M151_0.6	7	3	1000	3.038	1.75146	1	1	GCF_000847425.1	IV	HNRNPH2	Flaviviridae	NC_001837.1 Hepatitis GB virus A	-
M175_0.6	7	21	1000	11.871	3.4935	0.0128773	0.433107	GCF_000847425.1	IV	RBM24	Flaviviridae	NC_001837.1 Hepatitis GB virus A	+
M175_0.6	7	3	1000	4.766	2.18816	0.642399	1	GCF_000847425.1	IV	RBM24	Flaviviridae	NC_001837.1 Hepatitis GB virus A	-
encode_FUS_1	5	97	1000	76.666	9.64113	0.0250557	0.433107	GCF_000847425.1	IV	FUS	Flaviviridae	NC_001837.1 Hepatitis GB virus A	+
encode_FUS_1	5	35	1000	28.856	5.77604	0.261663	1	GCF_000847425.1	IV	FUS	Flaviviridae	NC_001837.1 Hepatitis GB virus A	-
encode_HNRNPK_1	5	5	1000	13.208	3.46334	0.0183547	0.433107	GCF_000847425.1	IV	HNRNPK	Flaviviridae	NC_001837.1 Hepatitis GB virus A	+
encode_HNRNPK_1	5	22	1000	26.63	5.07492	0.436683	1	GCF_000847425.1	IV	HNRNPK	Flaviviridae	NC_001837.1 Hepatitis GB virus A	-
encode_NOVA1_2	5	12	1000	5.579	2.34462	0.0159059	0.433107	GCF_000847425.1	IV	NOVA1	Flaviviridae	NC_001837.1 Hepatitis GB virus A	+
encode_NOVA1_2	5	18	1000	11.649	3.43855	0.0756107	0.915223	GCF_000847425.1	IV	NOVA1	Flaviviridae	NC_001837.1 Hepatitis GB virus A	-
encode_SNRPA_1	6	10	1000	19.767	4.22665	0.0237451	0.433107	GCF_000847425.1	IV	SNRPA	Flaviviridae	NC_001837.1 Hepatitis GB virus A	+
encode_SNRPA_1	6	21	1000	29.645	5.19191	0.117711	0.926336	GCF_000847425.1	IV	SNRPA	Flaviviridae	NC_001837.1 Hepatitis GB virus A	-
encode_SRSF5_2	5	40	1000	27.244	4.71707	0.0206009	0.433107	GCF_000847425.1	IV	SRSF5	Flaviviridae	NC_001837.1 Hepatitis GB virus A	+
encode_SRSF5_2	5	35	1000	42.007	5.84612	0.314342	1	GCF_000847425.1	IV	SRSF5	Flaviviridae	NC_001837.1 Hepatitis GB virus A	-
s21	6	11	1000	5.309	2.24333	0.025125	0.433107	GCF_000847425.1	IV	ZRANB2	Flaviviridae	NC_001837.1 Hepatitis GB virus A	+
s21	6	6	1000	5.392	2.29731	0.666665	1	GCF_000847425.1	IV	ZRANB2	Flaviviridae	NC_001837.1 Hepatitis GB virus A	-
M141_0.6	7	4	1000	11.061	3.27139	0.0329829	0.542719	GCF_000847425.1	IV	ESRP2	Flaviviridae	NC_001837.1 Hepatitis GB virus A	+
M141_0.6	7	2	1000	3.99	1.94311	0.452787	1	GCF_000847425.1	IV	ESRP2	Flaviviridae	NC_001837.1 Hepatitis GB virus A	-
1170	4	36	1000	49.462	5.69095	0.0540656	0.54366	GCF_000847425.1	IV	ELAVL1	Flaviviridae	NC_001837.1 Hepatitis GB virus A	+
1170	4	32	1000	34.185	4.75998	0.796954	1	GCF_000847425.1	IV	ELAVL1	Flaviviridae	NC_001837.1 Hepatitis GB virus A	-
41	7	7	1000	3.266	1.9144	0.0487174	0.54366	GCF_000847425.1	IV	KHSRP	Flaviviridae	NC_001837.1 Hepatitis GB virus A	+
41	7	1	1000	0.936	1.031	0.607825	1	GCF_000847425.1	IV	KHSRP	Flaviviridae	NC_001837.1 Hepatitis GB virus A	-
64	4	248	1000	219.244	10.4335	0.0514366	0.54366	GCF_000847425.1	IV	NOVA1	Flaviviridae	NC_001837.1 Hepatitis GB virus A	+
64	4	413	1000	396.247	12.9381	0.383044	1	GCF_000847425.1	IV	NOVA1	Flaviviridae	NC_001837.1 Hepatitis GB virus A	-
99	4	75	1000	58.286	6.64864	0.0350813	0.54366	GCF_000847425.1	IV	NOVA1	Flaviviridae	NC_001837.1 Hepatitis GB virus A	+
99	4	97	1000	85.101	7.72687	0.191185	1	GCF_000847425.1	IV	NOVA1	Flaviviridae	NC_001837.1 Hepatitis GB virus A	-
M054_0.6	7	6	1000	2.433	1.70658	0.0376742	0.54366	GCF_000847425.1	IV	RBM8A	Flaviviridae	NC_001837.1 Hepatitis GB virus A	+
M054_0.6	7	4	1000	1.949	1.51218	0.133774	1	GCF_000847425.1	IV	RBM8A	Flaviviridae	NC_001837.1 Hepatitis GB virus A	-
M075_0.6	7	5	1000	2.012	1.7484	0.0537231	0.54366	GCF_000847425.1	IV	TIA1	Flaviviridae	NC_001837.1 Hepatitis GB virus A	+
M075_0.6	7	0	1000	0.82	1.12999	1	1	GCF_000847425.1	IV	TIA1	Flaviviridae	NC_001837.1 Hepatitis GB virus A	-
M320_0.6a	4	118	1000	98.405	8.68968	0.0538676	0.54366	GCF_000847425.1	IV	MBNL1	Flaviviridae	NC_001837.1 Hepatitis GB virus A	+
M320_0.6a	4	57	1000	55.192	6.67306	0.786938	1	GCF_000847425.1	IV	MBNL1	Flaviviridae	NC_001837.1 Hepatitis GB virus A	-
encode_FUBP3_1	5	2	1000	7.447	2.76999	0.0414869	0.54366	GCF_000847425.1	IV	FUBP3	Flaviviridae	NC_001837.1 Hepatitis GB virus A	+
encode_FUBP3_1	5	2	1000	4.375	2.06316	0.341298	1	GCF_000847425.1	IV	FUBP3	Flaviviridae	NC_001837.1 Hepatitis GB virus A	-
encode_KHSRP_1	5	9	1000	17.511	4.02518	0.0408624	0.54366	GCF_000847425.1	IV	KHSRP	Flaviviridae	NC_001837.1 Hepatitis GB virus A	+
encode_KHSRP_1	5	8	1000	8.66	2.84579	1	1	GCF_000847425.1	IV	KHSRP	Flaviviridae	NC_001837.1 Hepatitis GB virus A	-
encode_SF1_1	5	9	1000	17.137	3.86538	0.0515449	0.54366	GCF_000847425.1	IV	SF1	Flaviviridae	NC_001837.1 Hepatitis GB virus A	+
encode_SF1_1	5	20	1000	20.661	4.23202	1	1	GCF_000847425.1	IV	SF1	Flaviviridae	NC_001837.1 Hepatitis GB virus A	-
encode_SRSF9_1	5	72	1000	56.277	6.89462	0.0381684	0.54366	GCF_000847425.1	IV	SRSF9	Flaviviridae	NC_001837.1 Hepatitis GB virus A	+
encode_SRSF9_1	5	40	1000	45.599	6.10569	0.457537	1	GCF_000847425.1	IV	SRSF9	Flaviviridae	NC_001837.1 Hepatitis GB virus A	-
s100	7	1	1000	5.675	2.60656	0.0534397	0.54366	GCF_000847425.1	IV	PTBP1	Flaviviridae	NC_001837.1 Hepatitis GB virus A	+
s100	7	2	1000	2.744	1.81487	1	1	GCF_000847425.1	IV	PTBP1	Flaviviridae	NC_001837.1 Hepatitis GB virus A	-
s102	7	55	1000	41.551	8.11204	0.0426938	0.54366	GCF_000847425.1	IV	RBM4	Flaviviridae	NC_001837.1 Hepatitis GB virus A	+
s102	7	23	1000	26.162	6.43095	0.623982	1	GCF_000847425.1	IV	RBM4	Flaviviridae	NC_001837.1 Hepatitis GB virus A	-
s30	4	118	1000	98.405	8.68968	0.0538676	0.54366	GCF_000847425.1	IV	MBNL1	Flaviviridae	NC_001837.1 Hepatitis GB virus A	+
s30	4	57	1000	55.192	6.67306	0.786938	1	GCF_000847425.1	IV	MBNL1	Flaviviridae	NC_001837.1 Hepatitis GB virus A	-
encode_EIF4G2_3	5	13	1000	7.302	2.65553	0.0593231	0.558189	GCF_000847425.1	IV	EIF4G2	Flaviviridae	NC_001837.1 Hepatitis GB virus A	+
encode_EIF4G2_3	5	10	1000	8.894	2.85358	0.615102	1	GCF_000847425.1	IV	EIF4G2	Flaviviridae	NC_001837.1 Hepatitis GB virus A	-
s31	5	100	1000	82.687	7.86988	0.0601364	0.558189	GCF_000847425.1	IV	FUS	Flaviviridae	NC_001837.1 Hepatitis GB virus A	+
s31	5	40	1000	32.298	5.0773	0.184779	1	GCF_000847425.1	IV	FUS	Flaviviridae	NC_001837.1 Hepatitis GB virus A	-
s37	7	0	1000	3.562	1.89888	0.0575406	0.558189	GCF_000847425.1	IV	SRSF2	Flaviviridae	NC_001837.1 Hepatitis GB virus A	+
s37	7	4	1000	2.884	1.65689	0.382681	1	GCF_000847425.1	IV	SRSF2	Flaviviridae	NC_001837.1 Hepatitis GB virus A	-
243	7	3	1000	0.906	0.937039	0.0638399	0.563487	GCF_000847425.1	IV	SRSF1	Flaviviridae	NC_001837.1 Hepatitis GB virus A	+
243	7	0	1000	1.068	0.994165	0.632914	1	GCF_000847425.1	IV	SRSF1	Flaviviridae	NC_001837.1 Hepatitis GB virus A	-
M002_0.6	7	4	1000	1.498	1.21551	0.0653769	0.563487	GCF_000847425.1	IV	ANKHD1	Flaviviridae	NC_001837.1 Hepatitis GB virus A	+
M002_0.6	7	2	1000	1.668	1.22281	0.685366	1	GCF_000847425.1	IV	ANKHD1	Flaviviridae	NC_001837.1 Hepatitis GB virus A	-
M273_0.6	7	3	1000	0.906	0.937039	0.0638399	0.563487	GCF_000847425.1	IV	SRSF1	Flaviviridae	NC_001837.1 Hepatitis GB virus A	+
M273_0.6	7	0	1000	1.068	0.994165	0.632914	1	GCF_000847425.1	IV	SRSF1	Flaviviridae	NC_001837.1 Hepatitis GB virus A	-
131	5	201	1000	226.229	13.7115	0.0924286	0.576882	GCF_000847425.1	IV	HNRNPH1	Flaviviridae	NC_001837.1 Hepatitis GB virus A	+
131	5	118	1000	109.951	9.71385	0.442502	1	GCF_000847425.1	IV	HNRNPH1	Flaviviridae	NC_001837.1 Hepatitis GB virus A	-
142	5	201	1000	226.229	13.7115	0.0924286	0.576882	GCF_000847425.1	IV	HNRNPH2	Flaviviridae	NC_001837.1 Hepatitis GB virus A	+
142	5	118	1000	109.951	9.71385	0.442502	1	GCF_000847425.1	IV	HNRNPH2	Flaviviridae	NC_001837.1 Hepatitis GB virus A	-
171	5	201	1000	226.229	13.7115	0.0924286	0.576882	GCF_000847425.1	IV	HNRNPF	Flaviviridae	NC_001837.1 Hepatitis GB virus A	+
171	5	118	1000	109.951	9.71385	0.442502	1	GCF_000847425.1	IV	HNRNPF	Flaviviridae	NC_001837.1 Hepatitis GB virus A	-
182	5	201	1000	226.229	13.7115	0.0924286	0.576882	GCF_000847425.1	IV	HNRNPH3	Flaviviridae	NC_001837.1 Hepatitis GB virus A	+
182	5	118	1000	109.951	9.71385	0.442502	1	GCF_000847425.1	IV	HNRNPH3	Flaviviridae	NC_001837.1 Hepatitis GB virus A	-
46	5	201	1000	226.229	13.7115	0.0924286	0.576882	GCF_000847425.1	IV	GRSF1	Flaviviridae	NC_001837.1 Hepatitis GB virus A	+
46	5	118	1000	109.951	9.71385	0.442502	1	GCF_000847425.1	IV	GRSF1	Flaviviridae	NC_001837.1 Hepatitis GB virus A	-
M047_0.6	7	0	1000	3.183	1.7812	0.0850043	0.576882	GCF_000847425.1	IV	RBM28	Flaviviridae	NC_001837.1 Hepatitis GB virus A	+
M047_0.6	7	6	1000	2.305	1.46701	0.0302278	0.71904	GCF_000847425.1	IV	RBM28	Flaviviridae	NC_001837.1 Hepatitis GB virus A	-
M163_0.6	7	0	1000	3.033	1.74555	0.0833227	0.576882	GCF_000847425.1	IV	IGF2BP3	Flaviviridae	NC_001837.1 Hepatitis GB virus A	+
M163_0.6	7	16	1000	9.274	3.15228	0.0452336	0.71904	GCF_000847425.1	IV	IGF2BP3	Flaviviridae	NC_001837.1 Hepatitis GB virus A	-
encode_CELF1_1	6	13	1000	21.41	4.5599	0.0816981	0.576882	GCF_000847425.1	IV	CELF1	Flaviviridae	NC_001837.1 Hepatitis GB virus A	+
encode_CELF1_1	6	5	1000	10.226	3.10105	0.115847	0.926336	GCF_000847425.1	IV	CELF1	Flaviviridae	NC_001837.1 Hepatitis GB virus A	-
encode_DAZ3_2	6	5	1000	11.086	3.27893	0.0697557	0.576882	GCF_000847425.1	IV	DAZ3	Flaviviridae	NC_001837.1 Hepatitis GB virus A	+
encode_DAZ3_2	6	3	1000	4.932	2.17672	0.502532	1	GCF_000847425.1	IV	DAZ3	Flaviviridae	NC_001837.1 Hepatitis GB virus A	-
encode_SFPQ_1	6	2	1000	6.853	2.49391	0.0799793	0.576882	GCF_000847425.1	IV	SFPQ	Flaviviridae	NC_001837.1 Hepatitis GB virus A	+
encode_SFPQ_1	6	14	1000	6.485	2.54327	0.00847064	0.613274	GCF_000847425.1	IV	SFPQ	Flaviviridae	NC_001837.1 Hepatitis GB virus A	-
encode_TRA2A_1	7	10	1000	5.371	2.27564	0.0769017	0.576882	GCF_000847425.1	IV	TRA2A	Flaviviridae	NC_001837.1 Hepatitis GB virus A	+
encode_TRA2A_1	7	8	1000	6.743	2.63095	0.560695	1	GCF_000847425.1	IV	TRA2A	Flaviviridae	NC_001837.1 Hepatitis GB virus A	-
s54	4	87	1000	71.908	7.53952	0.0756732	0.576882	GCF_000847425.1	IV	YBX1	Flaviviridae	NC_001837.1 Hepatitis GB virus A	+
s54	4	169	1000	151.376	10.2717	0.151414	1	GCF_000847425.1	IV	YBX1	Flaviviridae	NC_001837.1 Hepatitis GB virus A	-
s6	5	50	1000	63.581	6.51321	0.089242	0.576882	GCF_000847425.1	IV	TIAL1	Flaviviridae	NC_001837.1 Hepatitis GB virus A	+
s6	5	42	1000	44.246	5.36939	0.820969	1	GCF_000847425.1	IV	TIAL1	Flaviviridae	NC_001837.1 Hepatitis GB virus A	-
s86	7	6	1000	2.879	1.76677	0.0721842	0.576882	GCF_000847425.1	IV	CELF1	Flaviviridae	NC_001837.1 Hepatitis GB virus A	+
s86	7	0	1000	0.758	0.884431	1	1	GCF_000847425.1	IV	CELF1	Flaviviridae	NC_001837.1 Hepatitis GB virus A	-
s9	5	50	1000	63.581	6.51321	0.089242	0.576882	GCF_000847425.1	IV	TIA1	Flaviviridae	NC_001837.1 Hepatitis GB virus A	+
s9	5	42	1000	44.246	5.36939	0.820969	1	GCF_000847425.1	IV	TIA1	Flaviviridae	NC_001837.1 Hepatitis GB virus A	-
s97	5	29	1000	20.55	4.46087	0.0754702	0.576882	GCF_000847425.1	IV	SRSF9	Flaviviridae	NC_001837.1 Hepatitis GB virus A	+
s97	5	19	1000	25.914	4.89822	0.200051	1	GCF_000847425.1	IV	SRSF9	Flaviviridae	NC_001837.1 Hepatitis GB virus A	-
1174	4	29	1000	38.903	5.18966	0.126036	0.618764	GCF_000847425.1	IV	KHDRBS3	Flaviviridae	NC_001837.1 Hepatitis GB virus A	+
1174	4	40	1000	42.236	5.61568	0.816851	1	GCF_000847425.1	IV	KHDRBS3	Flaviviridae	NC_001837.1 Hepatitis GB virus A	-
167	7	84	1000	99.119	9.75161	0.129935	0.618764	GCF_000847425.1	IV	SRSF1	Flaviviridae	NC_001837.1 Hepatitis GB virus A	+
167	7	114	1000	128.673	10.2599	0.213661	1	GCF_000847425.1	IV	SRSF1	Flaviviridae	NC_001837.1 Hepatitis GB virus A	-
49	6	16	1000	11.106	3.33765	0.133379	0.618764	GCF_000847425.1	IV	ZFP36	Flaviviridae	NC_001837.1 Hepatitis GB virus A	+
49	6	1	1000	3.936	1.93226	0.200404	1	GCF_000847425.1	IV	ZFP36	Flaviviridae	NC_001837.1 Hepatitis GB virus A	-
953	9	2	1000	0.617	0.782895	0.127526	0.618764	GCF_000847425.1	IV	SRSF2	Flaviviridae	NC_001837.1 Hepatitis GB virus A	+
953	9	0	1000	1.08	1.05959	0.633218	1	GCF_000847425.1	IV	SRSF2	Flaviviridae	NC_001837.1 Hepatitis GB virus A	-
M032_0.6	7	0	1000	2.978	1.75288	0.132556	0.618764	GCF_000847425.1	IV	IGF2BP2	Flaviviridae	NC_001837.1 Hepatitis GB virus A	+
M032_0.6	7	13	1000	9.617	3.27552	0.256425	1	GCF_000847425.1	IV	IGF2BP2	Flaviviridae	NC_001837.1 Hepatitis GB virus A	-
M155_0.6	7	8	1000	4.546	2.15419	0.100972	0.618764	GCF_000847425.1	IV	ZNF638	Flaviviridae	NC_001837.1 Hepatitis GB virus A	+
M155_0.6	7	1	1000	1.728	1.29757	1	1	GCF_000847425.1	IV	ZNF638	Flaviviridae	NC_001837.1 Hepatitis GB virus A	-
M162_0.6	7	3	1000	1.229	1.15754	0.126851	0.618764	GCF_000847425.1	IV	PABPC5	Flaviviridae	NC_001837.1 Hepatitis GB virus A	+
M162_0.6	7	0	1000	1.874	1.35571	0.274348	1	GCF_000847425.1	IV	PABPC5	Flaviviridae	NC_001837.1 Hepatitis GB virus A	-
M332_0.6	10	1	1000	0.153	0.379124	0.141871	0.618764	GCF_000847425.1	IV	SRSF2	Flaviviridae	NC_001837.1 Hepatitis GB virus A	+
M332_0.6	10	0	1000	0.139	0.373924	1	1	GCF_000847425.1	IV	SRSF2	Flaviviridae	NC_001837.1 Hepatitis GB virus A	-
M352_0.6	9	2	1000	0.617	0.782895	0.127526	0.618764	GCF_000847425.1	IV	SRSF2	Flaviviridae	NC_001837.1 Hepatitis GB virus A	+
M352_0.6	9	0	1000	1.08	1.05959	0.633218	1	GCF_000847425.1	IV	SRSF2	Flaviviridae	NC_001837.1 Hepatitis GB virus A	-
encode_CPEB1_1	5	12	1000	7.631	3.25291	0.141239	0.618764	GCF_000847425.1	IV	CPEB1	Flaviviridae	NC_001837.1 Hepatitis GB virus A	+
encode_CPEB1_1	5	6	1000	4.637	2.55299	0.479297	1	GCF_000847425.1	IV	CPEB1	Flaviviridae	NC_001837.1 Hepatitis GB virus A	-
encode_DAZ3_1	5	17	1000	24.923	4.65045	0.131024	0.618764	GCF_000847425.1	IV	DAZ3	Flaviviridae	NC_001837.1 Hepatitis GB virus A	+
encode_DAZ3_1	5	9	1000	18.11	3.86586	0.0328768	0.71904	GCF_000847425.1	IV	DAZ3	Flaviviridae	NC_001837.1 Hepatitis GB virus A	-
encode_FUBP1_1	5	11	1000	17.601	4.18393	0.12113	0.618764	GCF_000847425.1	IV	FUBP1	Flaviviridae	NC_001837.1 Hepatitis GB virus A	+
encode_FUBP1_1	5	8	1000	8.818	3.07121	1	1	GCF_000847425.1	IV	FUBP1	Flaviviridae	NC_001837.1 Hepatitis GB virus A	-
encode_HNRNPCL1_1	5	12	1000	7.631	3.25291	0.141239	0.618764	GCF_000847425.1	IV	HNRNPCL1	Flaviviridae	NC_001837.1 Hepatitis GB virus A	+
encode_HNRNPCL1_1	5	6	1000	4.637	2.55299	0.479297	1	GCF_000847425.1	IV	HNRNPCL1	Flaviviridae	NC_001837.1 Hepatitis GB virus A	-
encode_HNRNPDL_1	5	2	1000	6.358	2.39281	0.106881	0.618764	GCF_000847425.1	IV	HNRNPDL	Flaviviridae	NC_001837.1 Hepatitis GB virus A	+
encode_HNRNPDL_1	5	4	1000	5.885	2.44453	0.67589	1	GCF_000847425.1	IV	HNRNPDL	Flaviviridae	NC_001837.1 Hepatitis GB virus A	-
encode_HNRNPF_2	5	60	1000	72.958	7.73486	0.141295	0.618764	GCF_000847425.1	IV	HNRNPF	Flaviviridae	NC_001837.1 Hepatitis GB virus A	+
encode_HNRNPF_2	5	51	1000	41.864	5.80717	0.162381	1	GCF_000847425.1	IV	HNRNPF	Flaviviridae	NC_001837.1 Hepatitis GB virus A	-
encode_PABPN1L_1	5	14	1000	9.364	3.51822	0.137362	0.618764	GCF_000847425.1	IV	PABPN1L	Flaviviridae	NC_001837.1 Hepatitis GB virus A	+
encode_PABPN1L_1	5	20	1000	15.434	4.43343	0.248847	1	GCF_000847425.1	IV	PABPN1L	Flaviviridae	NC_001837.1 Hepatitis GB virus A	-
encode_PCBP1_1	5	37	1000	28.43	4.38707	0.10968	0.618764	GCF_000847425.1	IV	PCBP1	Flaviviridae	NC_001837.1 Hepatitis GB virus A	+
encode_PCBP1_1	5	53	1000	57.842	6.02439	0.597312	1	GCF_000847425.1	IV	PCBP1	Flaviviridae	NC_001837.1 Hepatitis GB virus A	-
encode_RBM15B_2	5	0	1000	2.631	1.60356	0.123305	0.618764	GCF_000847425.1	IV	RBM15B	Flaviviridae	NC_001837.1 Hepatitis GB virus A	+
encode_RBM15B_2	5	3	1000	2.37	1.51307	0.515899	1	GCF_000847425.1	IV	RBM15B	Flaviviridae	NC_001837.1 Hepatitis GB virus A	-
encode_RBM24_1	5	36	1000	27.965	5.31489	0.129023	0.618764	GCF_000847425.1	IV	RBM24	Flaviviridae	NC_001837.1 Hepatitis GB virus A	+
encode_RBM24_1	5	4	1000	10.361	3.21201	0.0425065	0.71904	GCF_000847425.1	IV	RBM24	Flaviviridae	NC_001837.1 Hepatitis GB virus A	-
encode_TIA1_1	5	12	1000	7.631	3.25291	0.141239	0.618764	GCF_000847425.1	IV	TIA1	Flaviviridae	NC_001837.1 Hepatitis GB virus A	+
encode_TIA1_1	5	6	1000	4.637	2.55299	0.479297	1	GCF_000847425.1	IV	TIA1	Flaviviridae	NC_001837.1 Hepatitis GB virus A	-
encode_ZNF326_2	5	9	1000	5.215	2.33671	0.116723	0.618764	GCF_000847425.1	IV	ZNF326	Flaviviridae	NC_001837.1 Hepatitis GB virus A	+
encode_ZNF326_2	5	6	1000	8.253	2.92977	0.598528	1	GCF_000847425.1	IV	ZNF326	Flaviviridae	NC_001837.1 Hepatitis GB virus A	-
s1	5	21	1000	29.368	4.88861	0.138221	0.618764	GCF_000847425.1	IV	ELAVL2	Flaviviridae	NC_001837.1 Hepatitis GB virus A	+
s1	5	32	1000	26.953	4.48095	0.333202	1	GCF_000847425.1	IV	ELAVL2	Flaviviridae	NC_001837.1 Hepatitis GB virus A	-
s3	7	4	1000	1.971	1.37115	0.137663	0.618764	GCF_000847425.1	IV	ELAVL2	Flaviviridae	NC_001837.1 Hepatitis GB virus A	+
s3	7	3	1000	1.144	1.06132	0.108591	0.915223	GCF_000847425.1	IV	ELAVL2	Flaviviridae	NC_001837.1 Hepatitis GB virus A	-
s35	6	90	1000	105.178	9.2232	0.141346	0.618764	GCF_000847425.1	IV	HNRNPDL	Flaviviridae	NC_001837.1 Hepatitis GB virus A	+
s35	6	87	1000	98.859	8.84994	0.244902	1	GCF_000847425.1	IV	HNRNPDL	Flaviviridae	NC_001837.1 Hepatitis GB virus A	-
s46	9	2	1000	0.629	0.786115	0.131536	0.618764	GCF_000847425.1	IV	SRSF2	Flaviviridae	NC_001837.1 Hepatitis GB virus A	+
s46	9	0	1000	1.025	1.01952	0.632214	1	GCF_000847425.1	IV	SRSF2	Flaviviridae	NC_001837.1 Hepatitis GB virus A	-
M077_0.6	7	3	1000	1.309	1.44069	0.144954	0.624683	GCF_000847425.1	IV	U2AF2	Flaviviridae	NC_001837.1 Hepatitis GB virus A	+
M077_0.6	7	4	1000	0.994	1.22289	0.0186162	0.71904	GCF_000847425.1	IV	U2AF2	Flaviviridae	NC_001837.1 Hepatitis GB virus A	-
encode_ZNF326_1	5	30	1000	39.203	5.7589	0.149663	0.637386	GCF_000847425.1	IV	ZNF326	Flaviviridae	NC_001837.1 Hepatitis GB virus A	+
encode_ZNF326_1	5	20	1000	23.186	4.53718	0.602406	1	GCF_000847425.1	IV	ZNF326	Flaviviridae	NC_001837.1 Hepatitis GB virus A	-
M333_0.6	5	36	1000	28.643	5.2388	0.160504	0.660253	GCF_000847425.1	IV	SRSF9	Flaviviridae	NC_001837.1 Hepatitis GB virus A	+
M333_0.6	5	35	1000	45.476	6.47884	0.136286	1	GCF_000847425.1	IV	SRSF9	Flaviviridae	NC_001837.1 Hepatitis GB virus A	-
encode_HNRNPA0_2	4	12	1000	18.398	4.1498	0.159786	0.660253	GCF_000847425.1	IV	HNRNPA0	Flaviviridae	NC_001837.1 Hepatitis GB virus A	+
encode_HNRNPA0_2	4	12	1000	17.219	3.75781	0.275033	1	GCF_000847425.1	IV	HNRNPA0	Flaviviridae	NC_001837.1 Hepatitis GB virus A	-
encode_RBM47_2	5	12	1000	8.073	2.69275	0.157453	0.660253	GCF_000847425.1	IV	RBM47	Flaviviridae	NC_001837.1 Hepatitis GB virus A	+
encode_RBM47_2	5	6	1000	3.708	1.9064	0.195529	1	GCF_000847425.1	IV	RBM47	Flaviviridae	NC_001837.1 Hepatitis GB virus A	-
M033_0.6	7	2	1000	0.782	0.872489	0.184749	0.678489	GCF_000847425.1	IV	KHDRBS3	Flaviviridae	NC_001837.1 Hepatitis GB virus A	+
M033_0.6	7	1	1000	1.185	1.07048	1	1	GCF_000847425.1	IV	KHDRBS3	Flaviviridae	NC_001837.1 Hepatitis GB virus A	-
M156_0.6	7	3	1000	1.459	1.39077	0.180924	0.678489	GCF_000847425.1	IV	TIA1	Flaviviridae	NC_001837.1 Hepatitis GB virus A	+
M156_0.6	7	2	1000	0.869	1.01137	0.216194	1	GCF_000847425.1	IV	TIA1	Flaviviridae	NC_001837.1 Hepatitis GB virus A	-
M168_0.6	7	13	1000	9.205	3.01962	0.187898	0.678489	GCF_000847425.1	IV	SFPQ	Flaviviridae	NC_001837.1 Hepatitis GB virus A	+
M168_0.6	7	5	1000	3.204	1.76848	0.260654	1	GCF_000847425.1	IV	SFPQ	Flaviviridae	NC_001837.1 Hepatitis GB virus A	-
M177_0.6	7	2	1000	5.51	2.27312	0.194131	0.678489	GCF_000847425.1	IV	PCBP1	Flaviviridae	NC_001837.1 Hepatitis GB virus A	+
M177_0.6	7	11	1000	12.088	3.28984	0.885597	1	GCF_000847425.1	IV	PCBP1	Flaviviridae	NC_001837.1 Hepatitis GB virus A	-
encode_A1CF_1	6	0	1000	2.525	1.55557	0.192192	0.678489	GCF_000847425.1	IV	A1CF	Flaviviridae	NC_001837.1 Hepatitis GB virus A	+
encode_A1CF_1	6	3	1000	2.946	1.7315	0.771951	1	GCF_000847425.1	IV	A1CF	Flaviviridae	NC_001837.1 Hepatitis GB virus A	-
encode_FUBP1_2	7	4	1000	2.18	1.43933	0.176711	0.678489	GCF_000847425.1	IV	FUBP1	Flaviviridae	NC_001837.1 Hepatitis GB virus A	+
encode_FUBP1_2	7	1	1000	1.087	1.00521	1	1	GCF_000847425.1	IV	FUBP1	Flaviviridae	NC_001837.1 Hepatitis GB virus A	-
encode_NUPL2_1	7	2	1000	0.761	0.864075	0.177259	0.678489	GCF_000847425.1	IV	NUPL2	Flaviviridae	NC_001837.1 Hepatitis GB virus A	+
encode_NUPL2_1	7	0	1000	1.653	1.31084	0.421864	1	GCF_000847425.1	IV	NUPL2	Flaviviridae	NC_001837.1 Hepatitis GB virus A	-
encode_PUM1_1	5	14	1000	20.517	4.40217	0.182886	0.678489	GCF_000847425.1	IV	PUM1	Flaviviridae	NC_001837.1 Hepatitis GB virus A	+
encode_PUM1_1	5	16	1000	13.965	3.52082	0.589926	1	GCF_000847425.1	IV	PUM1	Flaviviridae	NC_001837.1 Hepatitis GB virus A	-
encode_RBFOX2_1	5	9	1000	14.461	3.76944	0.185882	0.678489	GCF_000847425.1	IV	RBFOX2	Flaviviridae	NC_001837.1 Hepatitis GB virus A	+
encode_RBFOX2_1	5	10	1000	11.734	3.37826	0.769227	1	GCF_000847425.1	IV	RBFOX2	Flaviviridae	NC_001837.1 Hepatitis GB virus A	-
encode_RBFOX3_1	5	9	1000	14.461	3.76944	0.185882	0.678489	GCF_000847425.1	IV	RBFOX3	Flaviviridae	NC_001837.1 Hepatitis GB virus A	+
encode_RBFOX3_1	5	10	1000	11.734	3.37826	0.769227	1	GCF_000847425.1	IV	RBFOX3	Flaviviridae	NC_001837.1 Hepatitis GB virus A	-
encode_RBM41_1	5	13	1000	8.931	2.75096	0.176417	0.678489	GCF_000847425.1	IV	RBM41	Flaviviridae	NC_001837.1 Hepatitis GB virus A	+
encode_RBM41_1	5	4	1000	7.59	2.63986	0.271053	1	GCF_000847425.1	IV	RBM41	Flaviviridae	NC_001837.1 Hepatitis GB virus A	-
encode_RBM4B_2	6	20	1000	27.346	4.9863	0.179356	0.678489	GCF_000847425.1	IV	RBM4B	Flaviviridae	NC_001837.1 Hepatitis GB virus A	+
encode_RBM4B_2	6	17	1000	19.204	4.15592	0.73126	1	GCF_000847425.1	IV	RBM4B	Flaviviridae	NC_001837.1 Hepatitis GB virus A	-
encode_SF1_2	5	2	1000	5.291	2.2688	0.190819	0.678489	GCF_000847425.1	IV	SF1	Flaviviridae	NC_001837.1 Hepatitis GB virus A	+
encode_SF1_2	5	0	1000	5.312	2.29389	0.00826641	0.613274	GCF_000847425.1	IV	SF1	Flaviviridae	NC_001837.1 Hepatitis GB virus A	-
encode_TAF15_1	7	64	1000	54.238	8.81777	0.194925	0.678489	GCF_000847425.1	IV	TAF15	Flaviviridae	NC_001837.1 Hepatitis GB virus A	+
encode_TAF15_1	7	25	1000	19.975	5.07031	0.260741	1	GCF_000847425.1	IV	TAF15	Flaviviridae	NC_001837.1 Hepatitis GB virus A	-
encode_TRNAU1AP_1	7	3	1000	1.405	1.28399	0.167701	0.678489	GCF_000847425.1	IV	TRNAU1AP	Flaviviridae	NC_001837.1 Hepatitis GB virus A	+
encode_TRNAU1AP_1	7	0	1000	0.714	0.833606	1	1	GCF_000847425.1	IV	TRNAU1AP	Flaviviridae	NC_001837.1 Hepatitis GB virus A	-
s52	6	43	1000	34.859	5.54399	0.173464	0.678489	GCF_000847425.1	IV	SRSF2	Flaviviridae	NC_001837.1 Hepatitis GB virus A	+
s52	6	31	1000	35.241	5.91861	0.553985	1	GCF_000847425.1	IV	SRSF2	Flaviviridae	NC_001837.1 Hepatitis GB virus A	-
947	10	1	1000	0.222	0.465761	0.199087	0.682634	GCF_000847425.1	IV	SNRPA	Flaviviridae	NC_001837.1 Hepatitis GB virus A	+
947	10	0	1000	0.038	0.191292	1	1	GCF_000847425.1	IV	SNRPA	Flaviviridae	NC_001837.1 Hepatitis GB virus A	-
M346_0.6	10	1	1000	0.223	0.466357	0.199887	0.682634	GCF_000847425.1	IV	SNRPA	Flaviviridae	NC_001837.1 Hepatitis GB virus A	+
M346_0.6	10	0	1000	0.038	0.191292	1	1	GCF_000847425.1	IV	SNRPA	Flaviviridae	NC_001837.1 Hepatitis GB virus A	-
encode_BOLL_1	7	1	1000	4.079	2.14274	0.204936	0.693335	GCF_000847425.1	IV	BOLL	Flaviviridae	NC_001837.1 Hepatitis GB virus A	+
encode_BOLL_1	7	1	1000	1.874	1.43254	1	1	GCF_000847425.1	IV	BOLL	Flaviviridae	NC_001837.1 Hepatitis GB virus A	-
M152_0.6	8	2	1000	0.853	0.944607	0.21037	0.694427	GCF_000847425.1	IV	FXR1	Flaviviridae	NC_001837.1 Hepatitis GB virus A	+
M152_0.6	8	1	1000	1.159	1.06811	1	1	GCF_000847425.1	IV	FXR1	Flaviviridae	NC_001837.1 Hepatitis GB virus A	-
encode_HNRNPK_2	5	4	1000	7.904	2.69482	0.210195	0.694427	GCF_000847425.1	IV	HNRNPK	Flaviviridae	NC_001837.1 Hepatitis GB virus A	+
encode_HNRNPK_2	5	14	1000	14.735	3.7133	1	1	GCF_000847425.1	IV	HNRNPK	Flaviviridae	NC_001837.1 Hepatitis GB virus A	-
encode_MSI1_2	5	4	1000	7.975	2.71104	0.211014	0.694427	GCF_000847425.1	IV	MSI1	Flaviviridae	NC_001837.1 Hepatitis GB virus A	+
encode_MSI1_2	5	15	1000	12.011	3.23626	0.383002	1	GCF_000847425.1	IV	MSI1	Flaviviridae	NC_001837.1 Hepatitis GB virus A	-
s42	5	84	1000	73.661	7.84931	0.219295	0.715179	GCF_000847425.1	IV	SRSF6	Flaviviridae	NC_001837.1 Hepatitis GB virus A	+
s42	5	82	1000	81.982	7.68679	0.955794	1	GCF_000847425.1	IV	SRSF6	Flaviviridae	NC_001837.1 Hepatitis GB virus A	-
922	4	182	1000	166.526	9.58119	0.225444	0.725548	GCF_000847425.1	IV	RBMX	Flaviviridae	NC_001837.1 Hepatitis GB virus A	+
922	4	325	1000	315.955	12.4302	0.606524	1	GCF_000847425.1	IV	RBMX	Flaviviridae	NC_001837.1 Hepatitis GB virus A	-
encode_RBM23_1	5	36	1000	29.259	6.06108	0.227132	0.725548	GCF_000847425.1	IV	RBM23	Flaviviridae	NC_001837.1 Hepatitis GB virus A	+
encode_RBM23_1	5	80	1000	62.502	8.90704	0.0306817	0.71904	GCF_000847425.1	IV	RBM23	Flaviviridae	NC_001837.1 Hepatitis GB virus A	-
s26	7	59	1000	50.34	7.45775	0.228763	0.725548	GCF_000847425.1	IV	SFPQ	Flaviviridae	NC_001837.1 Hepatitis GB virus A	+
s26	7	48	1000	57.259	7.6063	0.259048	1	GCF_000847425.1	IV	SFPQ	Flaviviridae	NC_001837.1 Hepatitis GB virus A	-
s58	10	1	1000	0.262	0.493558	0.230492	0.725548	GCF_000847425.1	IV	SRSF2	Flaviviridae	NC_001837.1 Hepatitis GB virus A	+
s58	10	0	1000	0.282	0.542928	1	1	GCF_000847425.1	IV	SRSF2	Flaviviridae	NC_001837.1 Hepatitis GB virus A	-
encode_UNK_2	6	10	1000	6.748	2.53711	0.240627	0.738195	GCF_000847425.1	IV	UNK	Flaviviridae	NC_001837.1 Hepatitis GB virus A	+
encode_UNK_2	6	16	1000	10.178	3.02117	0.0811048	0.915223	GCF_000847425.1	IV	UNK	Flaviviridae	NC_001837.1 Hepatitis GB virus A	-
s24	8	16	1000	11.744	3.27768	0.238675	0.738195	GCF_000847425.1	IV	SFPQ	Flaviviridae	NC_001837.1 Hepatitis GB virus A	+
s24	8	5	1000	8.738	2.89789	0.304677	1	GCF_000847425.1	IV	SFPQ	Flaviviridae	NC_001837.1 Hepatitis GB virus A	-
s41	9	1	1000	0.27	0.513189	0.236623	0.738195	GCF_000847425.1	IV	SRSF3	Flaviviridae	NC_001837.1 Hepatitis GB virus A	+
s41	9	0	1000	0.411	0.640695	1	1	GCF_000847425.1	IV	SRSF3	Flaviviridae	NC_001837.1 Hepatitis GB virus A	-
M020_0.6	7	5	1000	9.187	3.12439	0.242835	0.738708	GCF_000847425.1	IV	FXR2	Flaviviridae	NC_001837.1 Hepatitis GB virus A	+
M020_0.6	7	5	1000	7.072	2.57594	0.571809	1	GCF_000847425.1	IV	FXR2	Flaviviridae	NC_001837.1 Hepatitis GB virus A	-
encode_SRSF8_1	5	17	1000	22.882	4.69213	0.249208	0.751777	GCF_000847425.1	IV	SRSF8	Flaviviridae	NC_001837.1 Hepatitis GB virus A	+
encode_SRSF8_1	5	36	1000	35.022	5.6024	0.865257	1	GCF_000847425.1	IV	SRSF8	Flaviviridae	NC_001837.1 Hepatitis GB virus A	-
1215	8	1	1000	3.499	1.85619	0.278163	0.799168	GCF_000847425.1	IV	QKI	Flaviviridae	NC_001837.1 Hepatitis GB virus A	+
1215	8	6	1000	5.035	2.21962	0.650255	1	GCF_000847425.1	IV	QKI	Flaviviridae	NC_001837.1 Hepatitis GB virus A	-
M071_0.6	8	2	1000	1.009	0.999959	0.267552	0.799168	GCF_000847425.1	IV	SRSF7	Flaviviridae	NC_001837.1 Hepatitis GB virus A	+
M071_0.6	8	3	1000	1.103	1.10617	0.100178	0.915223	GCF_000847425.1	IV	SRSF7	Flaviviridae	NC_001837.1 Hepatitis GB virus A	-
M169_0.6	7	0	1000	1.991	1.45981	0.277768	0.799168	GCF_000847425.1	IV	HNRNPLL	Flaviviridae	NC_001837.1 Hepatitis GB virus A	+
M169_0.6	7	9	1000	6.63	2.61073	0.327171	1	GCF_000847425.1	IV	HNRNPLL	Flaviviridae	NC_001837.1 Hepatitis GB virus A	-
M354_0.6	6	54	1000	46.619	6.73894	0.270358	0.799168	GCF_000847425.1	IV	YTHDC1	Flaviviridae	NC_001837.1 Hepatitis GB virus A	+
M354_0.6	6	39	1000	44.557	6.32351	0.45247	1	GCF_000847425.1	IV	YTHDC1	Flaviviridae	NC_001837.1 Hepatitis GB virus A	-
encode_RBM22_1	5	14	1000	10.47	3.06112	0.275096	0.799168	GCF_000847425.1	IV	RBM22	Flaviviridae	NC_001837.1 Hepatitis GB virus A	+
encode_RBM22_1	5	10	1000	11.337	3.31035	0.881157	1	GCF_000847425.1	IV	RBM22	Flaviviridae	NC_001837.1 Hepatitis GB virus A	-
encode_RBM24_3	5	49	1000	41.933	8.35705	0.27761	0.799168	GCF_000847425.1	IV	RBM24	Flaviviridae	NC_001837.1 Hepatitis GB virus A	+
encode_RBM24_3	5	19	1000	15.991	4.9103	0.45026	1	GCF_000847425.1	IV	RBM24	Flaviviridae	NC_001837.1 Hepatitis GB virus A	-
1343	6	47	1000	55.62	7.13362	0.281303	0.801136	GCF_000847425.1	IV	SRSF5	Flaviviridae	NC_001837.1 Hepatitis GB virus A	+
1343	6	81	1000	80.542	7.78555	0.955338	1	GCF_000847425.1	IV	SRSF5	Flaviviridae	NC_001837.1 Hepatitis GB virus A	-
encode_MBNL1_3	5	11	1000	7.993	2.66309	0.283274	0.801136	GCF_000847425.1	IV	MBNL1	Flaviviridae	NC_001837.1 Hepatitis GB virus A	+
encode_MBNL1_3	5	4	1000	4.797	2.06835	1	1	GCF_000847425.1	IV	MBNL1	Flaviviridae	NC_001837.1 Hepatitis GB virus A	-
1285	6	0	1000	2.136	1.40052	0.286293	0.802307	GCF_000847425.1	IV	ZRANB2	Flaviviridae	NC_001837.1 Hepatitis GB virus A	+
1285	6	2	1000	2.443	1.61225	1	1	GCF_000847425.1	IV	ZRANB2	Flaviviridae	NC_001837.1 Hepatitis GB virus A	-
encode_PTBP3_1	6	6	1000	3.739	1.79558	0.288121	0.802307	GCF_000847425.1	IV	PTBP3	Flaviviridae	NC_001837.1 Hepatitis GB virus A	+
encode_PTBP3_1	6	2	1000	1.929	1.35565	0.719727	1	GCF_000847425.1	IV	PTBP3	Flaviviridae	NC_001837.1 Hepatitis GB virus A	-
M016_0.6	7	3	1000	6.211	2.47196	0.308494	0.846022	GCF_000847425.1	IV	FMR1	Flaviviridae	NC_001837.1 Hepatitis GB virus A	+
M016_0.6	7	6	1000	5.074	2.27282	0.651741	1	GCF_000847425.1	IV	FMR1	Flaviviridae	NC_001837.1 Hepatitis GB virus A	-
M153_0.6	7	3	1000	6.164	2.49426	0.307161	0.846022	GCF_000847425.1	IV	LIN28A	Flaviviridae	NC_001837.1 Hepatitis GB virus A	+
M153_0.6	7	4	1000	3.716	1.95376	0.791889	1	GCF_000847425.1	IV	LIN28A	Flaviviridae	NC_001837.1 Hepatitis GB virus A	-
s33	6	4	1000	2.411	1.47928	0.313262	0.852638	GCF_000847425.1	IV	KHDRBS1	Flaviviridae	NC_001837.1 Hepatitis GB virus A	+
s33	6	4	1000	2.278	1.44873	0.298639	1	GCF_000847425.1	IV	KHDRBS1	Flaviviridae	NC_001837.1 Hepatitis GB virus A	-
encode_KHDRBS3_1	5	6	1000	4.165	1.98689	0.321297	0.867982	GCF_000847425.1	IV	KHDRBS3	Flaviviridae	NC_001837.1 Hepatitis GB virus A	+
encode_KHDRBS3_1	5	4	1000	5.452	2.2398	0.827839	1	GCF_000847425.1	IV	KHDRBS3	Flaviviridae	NC_001837.1 Hepatitis GB virus A	-
949	7	0	1000	1.425	1.18566	0.413048	0.87554	GCF_000847425.1	IV	SNRPA	Flaviviridae	NC_001837.1 Hepatitis GB virus A	+
949	7	1	1000	1.08	1.05105	1	1	GCF_000847425.1	IV	SNRPA	Flaviviridae	NC_001837.1 Hepatitis GB virus A	-
M022_0.6	7	5	1000	3.609	1.94162	0.420028	0.87554	GCF_000847425.1	IV	HNRNPA1	Flaviviridae	NC_001837.1 Hepatitis GB virus A	+
M022_0.6	7	3	1000	2.53	1.54774	0.745032	1	GCF_000847425.1	IV	HNRNPA1	Flaviviridae	NC_001837.1 Hepatitis GB virus A	-
M031_0.6	7	0	1000	1.485	1.28741	0.413864	0.87554	GCF_000847425.1	IV	ELAVL1	Flaviviridae	NC_001837.1 Hepatitis GB virus A	+
M031_0.6	7	1	1000	0.679	0.844199	0.492888	1	GCF_000847425.1	IV	ELAVL1	Flaviviridae	NC_001837.1 Hepatitis GB virus A	-
M035_0.6	7	4	1000	2.819	1.74278	0.371927	0.87554	GCF_000847425.1	IV	LIN28A	Flaviviridae	NC_001837.1 Hepatitis GB virus A	+
M035_0.6	7	4	1000	2.911	1.72918	0.54563	1	GCF_000847425.1	IV	LIN28A	Flaviviridae	NC_001837.1 Hepatitis GB virus A	-
M081_0.6	7	2	1000	1.382	1.1889	0.401947	0.87554	GCF_000847425.1	IV	YBX1	Flaviviridae	NC_001837.1 Hepatitis GB virus A	+
M081_0.6	7	7	1000	3.772	1.95904	0.111243	0.915223	GCF_000847425.1	IV	YBX1	Flaviviridae	NC_001837.1 Hepatitis GB virus A	-
M086_0.6	7	2	1000	4.357	2.26156	0.341278	0.87554	GCF_000847425.1	IV	SRSF10	Flaviviridae	NC_001837.1 Hepatitis GB virus A	+
M086_0.6	7	9	1000	6.418	2.8052	0.316251	1	GCF_000847425.1	IV	SRSF10	Flaviviridae	NC_001837.1 Hepatitis GB virus A	-
M102_0.6	6	16	1000	13.23	3.57714	0.407949	0.87554	GCF_000847425.1	IV	SRSF1	Flaviviridae	NC_001837.1 Hepatitis GB virus A	+
M102_0.6	6	9	1000	8.692	2.87113	0.864256	1	GCF_000847425.1	IV	SRSF1	Flaviviridae	NC_001837.1 Hepatitis GB virus A	-
M103_0.6	6	16	1000	13.23	3.57714	0.407949	0.87554	GCF_000847425.1	IV	SRSF1	Flaviviridae	NC_001837.1 Hepatitis GB virus A	+
M103_0.6	6	9	1000	8.692	2.87113	0.864256	1	GCF_000847425.1	IV	SRSF1	Flaviviridae	NC_001837.1 Hepatitis GB virus A	-
M298_0.6	6	2	1000	4.511	2.04648	0.342594	0.87554	GCF_000847425.1	IV	RBFOX1	Flaviviridae	NC_001837.1 Hepatitis GB virus A	+
M298_0.6	6	2	1000	2.656	1.69604	1	1	GCF_000847425.1	IV	RBFOX1	Flaviviridae	NC_001837.1 Hepatitis GB virus A	-
M348_0.6	7	0	1000	1.425	1.18566	0.413048	0.87554	GCF_000847425.1	IV	SNRPA	Flaviviridae	NC_001837.1 Hepatitis GB virus A	+
M348_0.6	7	1	1000	1.08	1.05105	1	1	GCF_000847425.1	IV	SNRPA	Flaviviridae	NC_001837.1 Hepatitis GB virus A	-
encode_ELAVL4_1	5	10	1000	7.628	3.07524	0.361263	0.87554	GCF_000847425.1	IV	ELAVL4	Flaviviridae	NC_001837.1 Hepatitis GB virus A	+
encode_ELAVL4_1	5	4	1000	4.434	2.29977	1	1	GCF_000847425.1	IV	ELAVL4	Flaviviridae	NC_001837.1 Hepatitis GB virus A	-
encode_EWSR1_2	5	21	1000	17.46	4.13685	0.399373	0.87554	GCF_000847425.1	IV	EWSR1	Flaviviridae	NC_001837.1 Hepatitis GB virus A	+
encode_EWSR1_2	5	16	1000	12.748	3.47888	0.32611	1	GCF_000847425.1	IV	EWSR1	Flaviviridae	NC_001837.1 Hepatitis GB virus A	-
encode_FUBP3_2	5	10	1000	7.623	3.04896	0.361021	0.87554	GCF_000847425.1	IV	FUBP3	Flaviviridae	NC_001837.1 Hepatitis GB virus A	+
encode_FUBP3_2	5	6	1000	4.339	2.26875	0.339444	1	GCF_000847425.1	IV	FUBP3	Flaviviridae	NC_001837.1 Hepatitis GB virus A	-
encode_HNRNPA0_1	5	6	1000	9.122	3.00335	0.404659	0.87554	GCF_000847425.1	IV	HNRNPA0	Flaviviridae	NC_001837.1 Hepatitis GB virus A	+
encode_HNRNPA0_1	5	9	1000	9.717	3.03218	1	1	GCF_000847425.1	IV	HNRNPA0	Flaviviridae	NC_001837.1 Hepatitis GB virus A	-
encode_HNRNPA2B1_2	5	7	1000	10.423	3.10704	0.352533	0.87554	GCF_000847425.1	IV	HNRNPA2B1	Flaviviridae	NC_001837.1 Hepatitis GB virus A	+
encode_HNRNPA2B1_2	5	6	1000	6.526	2.53925	1	1	GCF_000847425.1	IV	HNRNPA2B1	Flaviviridae	NC_001837.1 Hepatitis GB virus A	-
encode_HNRNPDL_2	5	0	1000	1.638	1.32011	0.42084	0.87554	GCF_000847425.1	IV	HNRNPDL	Flaviviridae	NC_001837.1 Hepatitis GB virus A	+
encode_HNRNPDL_2	5	1	1000	1.283	1.15336	1	1	GCF_000847425.1	IV	HNRNPDL	Flaviviridae	NC_001837.1 Hepatitis GB virus A	-
encode_HNRNPL_1	5	7	1000	10.447	3.25665	0.352618	0.87554	GCF_000847425.1	IV	HNRNPL	Flaviviridae	NC_001837.1 Hepatitis GB virus A	+
encode_HNRNPL_1	5	29	1000	26.627	5.10744	0.626631	1	GCF_000847425.1	IV	HNRNPL	Flaviviridae	NC_001837.1 Hepatitis GB virus A	-
encode_IGF2BP2_1	7	1	1000	3.049	1.67613	0.384911	0.87554	GCF_000847425.1	IV	IGF2BP2	Flaviviridae	NC_001837.1 Hepatitis GB virus A	+
encode_IGF2BP2_1	7	9	1000	9.792	2.99862	1	1	GCF_000847425.1	IV	IGF2BP2	Flaviviridae	NC_001837.1 Hepatitis GB virus A	-
encode_ILF2_2	5	7	1000	10.423	3.10704	0.352533	0.87554	GCF_000847425.1	IV	ILF2	Flaviviridae	NC_001837.1 Hepatitis GB virus A	+
encode_ILF2_2	5	6	1000	6.526	2.53925	1	1	GCF_000847425.1	IV	ILF2	Flaviviridae	NC_001837.1 Hepatitis GB virus A	-
encode_PRR3_1	5	10	1000	7.327	2.55276	0.349171	0.87554	GCF_000847425.1	IV	PRR3	Flaviviridae	NC_001837.1 Hepatitis GB virus A	+
encode_PRR3_1	5	17	1000	10.872	3.16475	0.067684	0.875057	GCF_000847425.1	IV	PRR3	Flaviviridae	NC_001837.1 Hepatitis GB virus A	-
encode_PRR3_2	5	7	1000	4.952	2.23667	0.35948	0.87554	GCF_000847425.1	IV	PRR3	Flaviviridae	NC_001837.1 Hepatitis GB virus A	+
encode_PRR3_2	5	5	1000	6.112	2.43298	0.839492	1	GCF_000847425.1	IV	PRR3	Flaviviridae	NC_001837.1 Hepatitis GB virus A	-
encode_RBM6_2	5	16	1000	12.865	3.30147	0.399187	0.87554	GCF_000847425.1	IV	RBM6	Flaviviridae	NC_001837.1 Hepatitis GB virus A	+
encode_RBM6_2	5	48	1000	34.733	5.68419	0.0328446	0.71904	GCF_000847425.1	IV	RBM6	Flaviviridae	NC_001837.1 Hepatitis GB virus A	-
encode_RC3H1_2	5	10	1000	7.829	2.68868	0.372092	0.87554	GCF_000847425.1	IV	RC3H1	Flaviviridae	NC_001837.1 Hepatitis GB virus A	+
encode_RC3H1_2	5	6	1000	4.48	2.10714	0.46941	1	GCF_000847425.1	IV	RC3H1	Flaviviridae	NC_001837.1 Hepatitis GB virus A	-
encode_SRSF11_1	5	61	1000	54.368	6.62695	0.375849	0.87554	GCF_000847425.1	IV	SRSF11	Flaviviridae	NC_001837.1 Hepatitis GB virus A	+
encode_SRSF11_1	5	55	1000	53.518	6.65492	0.836844	1	GCF_000847425.1	IV	SRSF11	Flaviviridae	NC_001837.1 Hepatitis GB virus A	-
encode_SRSF9_2	5	17	1000	13.491	3.40874	0.337188	0.87554	GCF_000847425.1	IV	SRSF9	Flaviviridae	NC_001837.1 Hepatitis GB virus A	+
encode_SRSF9_2	5	7	1000	9.053	2.9039	0.617875	1	GCF_000847425.1	IV	SRSF9	Flaviviridae	NC_001837.1 Hepatitis GB virus A	-
encode_TAF15_2	5	7	1000	10.423	3.10704	0.352533	0.87554	GCF_000847425.1	IV	TAF15	Flaviviridae	NC_001837.1 Hepatitis GB virus A	+
encode_TAF15_2	5	6	1000	6.526	2.53925	1	1	GCF_000847425.1	IV	TAF15	Flaviviridae	NC_001837.1 Hepatitis GB virus A	-
encode_TARDBP_1	5	51	1000	45.821	6.34328	0.415414	0.87554	GCF_000847425.1	IV	TARDBP	Flaviviridae	NC_001837.1 Hepatitis GB virus A	+
encode_TARDBP_1	5	17	1000	20.155	4.32431	0.576394	1	GCF_000847425.1	IV	TARDBP	Flaviviridae	NC_001837.1 Hepatitis GB virus A	-
encode_ZFP36_2	5	0	1000	1.519	1.22766	0.414832	0.87554	GCF_000847425.1	IV	ZFP36	Flaviviridae	NC_001837.1 Hepatitis GB virus A	+
encode_ZFP36_2	5	2	1000	1.632	1.25704	0.680872	1	GCF_000847425.1	IV	ZFP36	Flaviviridae	NC_001837.1 Hepatitis GB virus A	-
s101	7	0	1000	1.511	1.34822	0.414572	0.87554	GCF_000847425.1	IV	ELAVL1	Flaviviridae	NC_001837.1 Hepatitis GB virus A	+
s101	7	1	1000	0.53	0.813487	0.411404	1	GCF_000847425.1	IV	ELAVL1	Flaviviridae	NC_001837.1 Hepatitis GB virus A	-
s103	7	0	1000	1.556	1.4321	0.416278	0.87554	GCF_000847425.1	IV	KHDRBS3	Flaviviridae	NC_001837.1 Hepatitis GB virus A	+
s103	7	1	1000	3.086	2.06225	0.385982	1	GCF_000847425.1	IV	KHDRBS3	Flaviviridae	NC_001837.1 Hepatitis GB virus A	-
s104	7	2	1000	1.413	1.27045	0.412657	0.87554	GCF_000847425.1	IV	SRSF10	Flaviviridae	NC_001837.1 Hepatitis GB virus A	+
s104	7	0	1000	2.602	1.6396	0.196931	1	GCF_000847425.1	IV	SRSF10	Flaviviridae	NC_001837.1 Hepatitis GB virus A	-
s12	5	20	1000	16.449	3.9904	0.385099	0.87554	GCF_000847425.1	IV	PTBP1	Flaviviridae	NC_001837.1 Hepatitis GB virus A	+
s12	5	14	1000	9.927	2.98372	0.199956	1	GCF_000847425.1	IV	PTBP1	Flaviviridae	NC_001837.1 Hepatitis GB virus A	-
s15	6	28	1000	33.661	5.38898	0.386973	0.87554	GCF_000847425.1	IV	HNRNPK	Flaviviridae	NC_001837.1 Hepatitis GB virus A	+
s15	6	52	1000	62.58	7.19635	0.204029	1	GCF_000847425.1	IV	HNRNPK	Flaviviridae	NC_001837.1 Hepatitis GB virus A	-
s19	5	48	1000	55.192	6.58411	0.379566	0.87554	GCF_000847425.1	IV	SRSF5	Flaviviridae	NC_001837.1 Hepatitis GB virus A	+
s19	5	52	1000	60.898	7.36599	0.274379	1	GCF_000847425.1	IV	SRSF5	Flaviviridae	NC_001837.1 Hepatitis GB virus A	-
s20	6	18	1000	22.733	4.56032	0.399249	0.87554	GCF_000847425.1	IV	ZRANB2	Flaviviridae	NC_001837.1 Hepatitis GB virus A	+
s20	6	26	1000	16.641	3.98196	0.0268167	0.71904	GCF_000847425.1	IV	ZRANB2	Flaviviridae	NC_001837.1 Hepatitis GB virus A	-
s36	7	0	1000	1.445	1.21179	0.413189	0.87554	GCF_000847425.1	IV	HNRNPDL	Flaviviridae	NC_001837.1 Hepatitis GB virus A	+
s36	7	4	1000	2.136	1.4689	0.168195	1	GCF_000847425.1	IV	HNRNPDL	Flaviviridae	NC_001837.1 Hepatitis GB virus A	-
s57	10	1	1000	0.424	0.659286	0.345582	0.87554	GCF_000847425.1	IV	SRSF2	Flaviviridae	NC_001837.1 Hepatitis GB virus A	+
s57	10	0	1000	0.104	0.330595	1	1	GCF_000847425.1	IV	SRSF2	Flaviviridae	NC_001837.1 Hepatitis GB virus A	-
s60	8	0	1000	1.556	1.24837	0.416278	0.87554	GCF_000847425.1	IV	SRSF1	Flaviviridae	NC_001837.1 Hepatitis GB virus A	+
s60	8	1	1000	1.376	1.17303	1	1	GCF_000847425.1	IV	SRSF1	Flaviviridae	NC_001837.1 Hepatitis GB virus A	-
M108_0.6	7	0	1000	1.415	1.19926	0.413028	0.87554	GCF_000847425.1	IV	ELAVL1	Flaviviridae	NC_001837.1 Hepatitis GB virus A	+
M108_0.6	7	0	1000	0.55	0.745692	1	1	GCF_000847425.1	IV	ELAVL1	Flaviviridae	NC_001837.1 Hepatitis GB virus A	-
s29	7	0	1000	1.499	1.23188	0.414219	0.87554	GCF_000847425.1	IV	NOVA2	Flaviviridae	NC_001837.1 Hepatitis GB virus A	+
s29	7	0	1000	1.852	1.34681	0.274083	1	GCF_000847425.1	IV	NOVA2	Flaviviridae	NC_001837.1 Hepatitis GB virus A	-
155	6	95	1000	103.668	9.16164	0.429229	0.887891	GCF_000847425.1	IV	ZFP36	Flaviviridae	NC_001837.1 Hepatitis GB virus A	+
155	6	114	1000	93.992	8.93072	0.0429686	0.71904	GCF_000847425.1	IV	ZFP36	Flaviviridae	NC_001837.1 Hepatitis GB virus A	-
M104_0.6	7	13	1000	10.546	3.22495	0.43757	0.899742	GCF_000847425.1	IV	SRSF1	Flaviviridae	NC_001837.1 Hepatitis GB virus A	+
M104_0.6	7	7	1000	6.666	2.61137	0.844769	1	GCF_000847425.1	IV	SRSF1	Flaviviridae	NC_001837.1 Hepatitis GB virus A	-
M157_0.6	7	9	1000	6.894	2.82006	0.439929	0.899742	GCF_000847425.1	IV	CELF5	Flaviviridae	NC_001837.1 Hepatitis GB virus A	+
M157_0.6	7	1	1000	1.695	1.37691	1	1	GCF_000847425.1	IV	CELF5	Flaviviridae	NC_001837.1 Hepatitis GB virus A	-
encode_TRNAU1AP_2	5	2	1000	4.201	2.06419	0.457033	0.929473	GCF_000847425.1	IV	TRNAU1AP	Flaviviridae	NC_001837.1 Hepatitis GB virus A	+
encode_TRNAU1AP_2	5	2	1000	4.826	2.09908	0.255814	1	GCF_000847425.1	IV	TRNAU1AP	Flaviviridae	NC_001837.1 Hepatitis GB virus A	-
M051_0.6	7	3	1000	2.076	1.38135	0.46929	0.934954	GCF_000847425.1	IV	RBM41	Flaviviridae	NC_001837.1 Hepatitis GB virus A	+
M051_0.6	7	0	1000	1.575	1.27593	0.417173	1	GCF_000847425.1	IV	RBM41	Flaviviridae	NC_001837.1 Hepatitis GB virus A	-
M307_0.6	5	9	1000	11.99	3.35308	0.47006	0.934954	GCF_000847425.1	IV	NONO	Flaviviridae	NC_001837.1 Hepatitis GB virus A	+
M307_0.6	5	16	1000	11.828	3.3328	0.240418	1	GCF_000847425.1	IV	NONO	Flaviviridae	NC_001837.1 Hepatitis GB virus A	-
encode_HNRNPDL_3	5	3	1000	2.051	1.41789	0.465704	0.934954	GCF_000847425.1	IV	HNRNPDL	Flaviviridae	NC_001837.1 Hepatitis GB virus A	+
encode_HNRNPDL_3	5	6	1000	2.824	1.64369	0.0671946	0.875057	GCF_000847425.1	IV	HNRNPDL	Flaviviridae	NC_001837.1 Hepatitis GB virus A	-
encode_PUF60_1	5	14	1000	11.775	3.58318	0.465038	0.934954	GCF_000847425.1	IV	PUF60	Flaviviridae	NC_001837.1 Hepatitis GB virus A	+
encode_PUF60_1	5	11	1000	6.476	2.71529	0.109198	0.915223	GCF_000847425.1	IV	PUF60	Flaviviridae	NC_001837.1 Hepatitis GB virus A	-
M021_0.6	7	3	1000	2.256	1.49221	0.49701	0.944253	GCF_000847425.1	IV	G3BP2	Flaviviridae	NC_001837.1 Hepatitis GB virus A	+
M021_0.6	7	3	1000	1.86	1.3536	0.441135	1	GCF_000847425.1	IV	G3BP2	Flaviviridae	NC_001837.1 Hepatitis GB virus A	-
M176_0.6	7	1	1000	0.67	0.811023	0.488303	0.944253	GCF_000847425.1	IV	KHDRBS2	Flaviviridae	NC_001837.1 Hepatitis GB virus A	+
M176_0.6	7	1	1000	0.927	0.982159	0.604279	1	GCF_000847425.1	IV	KHDRBS2	Flaviviridae	NC_001837.1 Hepatitis GB virus A	-
M232_0.6	7	1	1000	0.7	1.08774	0.503427	0.944253	GCF_000847425.1	IV	ELAVL1	Flaviviridae	NC_001837.1 Hepatitis GB virus A	+
M232_0.6	7	0	1000	0.271	0.644961	1	1	GCF_000847425.1	IV	ELAVL1	Flaviviridae	NC_001837.1 Hepatitis GB virus A	-
encode_EIF4G2_2	5	6	1000	8.85	2.93293	0.496979	0.944253	GCF_000847425.1	IV	EIF4G2	Flaviviridae	NC_001837.1 Hepatitis GB virus A	+
encode_EIF4G2_2	5	10	1000	8.087	2.68601	0.477459	1	GCF_000847425.1	IV	EIF4G2	Flaviviridae	NC_001837.1 Hepatitis GB virus A	-
encode_HNRNPC_1	5	6	1000	4.83	2.62602	0.493885	0.944253	GCF_000847425.1	IV	HNRNPC	Flaviviridae	NC_001837.1 Hepatitis GB virus A	+
encode_HNRNPC_1	5	3	1000	2.583	1.92531	0.747957	1	GCF_000847425.1	IV	HNRNPC	Flaviviridae	NC_001837.1 Hepatitis GB virus A	-
encode_NUPL2_2	6	11	1000	9.085	2.74724	0.503103	0.944253	GCF_000847425.1	IV	NUPL2	Flaviviridae	NC_001837.1 Hepatitis GB virus A	+
encode_NUPL2_2	6	11	1000	11.193	3.16509	1	1	GCF_000847425.1	IV	NUPL2	Flaviviridae	NC_001837.1 Hepatitis GB virus A	-
encode_PCBP4_1	5	37	1000	42.25	5.75401	0.48701	0.944253	GCF_000847425.1	IV	PCBP4	Flaviviridae	NC_001837.1 Hepatitis GB virus A	+
encode_PCBP4_1	5	52	1000	68	6.91664	0.0512774	0.742497	GCF_000847425.1	IV	PCBP4	Flaviviridae	NC_001837.1 Hepatitis GB virus A	-
encode_RBM6_1	6	6	1000	8.544	2.94801	0.49284	0.944253	GCF_000847425.1	IV	RBM6	Flaviviridae	NC_001837.1 Hepatitis GB virus A	+
encode_RBM6_1	6	19	1000	19.772	4.33991	1	1	GCF_000847425.1	IV	RBM6	Flaviviridae	NC_001837.1 Hepatitis GB virus A	-
s11	7	3	1000	2.288	1.47215	0.502227	0.944253	GCF_000847425.1	IV	TIA1	Flaviviridae	NC_001837.1 Hepatitis GB virus A	+
s11	7	2	1000	1.186	1.06044	0.332311	1	GCF_000847425.1	IV	TIA1	Flaviviridae	NC_001837.1 Hepatitis GB virus A	-
s13	5	6	1000	4.785	2.6168	0.490265	0.944253	GCF_000847425.1	IV	HNRNPC	Flaviviridae	NC_001837.1 Hepatitis GB virus A	+
s13	5	3	1000	2.578	1.92188	0.747674	1	GCF_000847425.1	IV	HNRNPC	Flaviviridae	NC_001837.1 Hepatitis GB virus A	-
s39	7	3	1000	2.255	1.49607	0.496848	0.944253	GCF_000847425.1	IV	SRSF3	Flaviviridae	NC_001837.1 Hepatitis GB virus A	+
s39	7	4	1000	4.876	2.17056	1	1	GCF_000847425.1	IV	SRSF3	Flaviviridae	NC_001837.1 Hepatitis GB virus A	-
M004_0.6	7	12	1000	9.958	3.66246	0.522282	0.96364	GCF_000847425.1	IV	CELF4	Flaviviridae	NC_001837.1 Hepatitis GB virus A	+
M004_0.6	7	2	1000	2.63	1.77659	1	1	GCF_000847425.1	IV	CELF4	Flaviviridae	NC_001837.1 Hepatitis GB virus A	-
M026_0.6	7	1	1000	2.639	1.57326	0.532398	0.96364	GCF_000847425.1	IV	HNRNPK	Flaviviridae	NC_001837.1 Hepatitis GB virus A	+
M026_0.6	7	4	1000	8.414	2.79686	0.163888	1	GCF_000847425.1	IV	HNRNPK	Flaviviridae	NC_001837.1 Hepatitis GB virus A	-
M044_0.6	7	7	1000	5.526	2.38894	0.51672	0.96364	GCF_000847425.1	IV	PPRC1	Flaviviridae	NC_001837.1 Hepatitis GB virus A	+
M044_0.6	7	10	1000	5.659	2.5245	0.0855742	0.915223	GCF_000847425.1	IV	PPRC1	Flaviviridae	NC_001837.1 Hepatitis GB virus A	-
M069_0.6	7	1	1000	2.639	1.64785	0.532398	0.96364	GCF_000847425.1	IV	SNRPA	Flaviviridae	NC_001837.1 Hepatitis GB virus A	+
M069_0.6	7	2	1000	3.948	2.05755	0.452524	1	GCF_000847425.1	IV	SNRPA	Flaviviridae	NC_001837.1 Hepatitis GB virus A	-
M127_0.6	7	1	1000	2.558	1.61284	0.530438	0.96364	GCF_000847425.1	IV	ELAVL1	Flaviviridae	NC_001837.1 Hepatitis GB virus A	+
M127_0.6	7	0	1000	0.98	1.02404	1	1	GCF_000847425.1	IV	ELAVL1	Flaviviridae	NC_001837.1 Hepatitis GB virus A	-
encode_ELAVL4_2	5	1	1000	2.528	1.52366	0.529971	0.96364	GCF_000847425.1	IV	ELAVL4	Flaviviridae	NC_001837.1 Hepatitis GB virus A	+
encode_ELAVL4_2	5	0	1000	1.985	1.42927	0.277513	1	GCF_000847425.1	IV	ELAVL4	Flaviviridae	NC_001837.1 Hepatitis GB virus A	-
s2	6	12	1000	10.152	2.91709	0.52728	0.96364	GCF_000847425.1	IV	ELAVL2	Flaviviridae	NC_001837.1 Hepatitis GB virus A	+
s2	6	9	1000	7.129	2.43686	0.449277	1	GCF_000847425.1	IV	ELAVL2	Flaviviridae	NC_001837.1 Hepatitis GB virus A	-
1393	7	20	1000	17.629	4.12048	0.549594	0.965791	GCF_000847425.1	IV	SRSF1	Flaviviridae	NC_001837.1 Hepatitis GB virus A	+
1393	7	19	1000	26.066	4.87333	0.200743	1	GCF_000847425.1	IV	SRSF1	Flaviviridae	NC_001837.1 Hepatitis GB virus A	-
M043_0.6	7	4	1000	6.272	2.78815	0.54441	0.965791	GCF_000847425.1	IV	PCBP2	Flaviviridae	NC_001837.1 Hepatitis GB virus A	+
M043_0.6	7	22	1000	13.939	4.44962	0.042319	0.71904	GCF_000847425.1	IV	PCBP2	Flaviviridae	NC_001837.1 Hepatitis GB virus A	-
M290_0.6	7	4	1000	6.172	2.42121	0.542587	0.965791	GCF_000847425.1	IV	EIF4B	Flaviviridae	NC_001837.1 Hepatitis GB virus A	+
M290_0.6	7	4	1000	3.641	1.91305	0.78899	1	GCF_000847425.1	IV	EIF4B	Flaviviridae	NC_001837.1 Hepatitis GB virus A	-
encode_IGF2BP1_1	5	4	1000	2.963	1.6542	0.549174	0.965791	GCF_000847425.1	IV	IGF2BP1	Flaviviridae	NC_001837.1 Hepatitis GB virus A	+
encode_IGF2BP1_1	5	5	1000	5.701	2.39861	1	1	GCF_000847425.1	IV	IGF2BP1	Flaviviridae	NC_001837.1 Hepatitis GB virus A	-
encode_MSI1_1	7	4	1000	6.063	2.4668	0.541323	0.965791	GCF_000847425.1	IV	MSI1	Flaviviridae	NC_001837.1 Hepatitis GB virus A	+
encode_MSI1_1	7	2	1000	6.292	2.40885	0.105908	0.915223	GCF_000847425.1	IV	MSI1	Flaviviridae	NC_001837.1 Hepatitis GB virus A	-
s8	7	4	1000	2.945	1.67833	0.547915	0.965791	GCF_000847425.1	IV	TIAL1	Flaviviridae	NC_001837.1 Hepatitis GB virus A	+
s8	7	3	1000	1.604	1.22666	0.217667	1	GCF_000847425.1	IV	TIAL1	Flaviviridae	NC_001837.1 Hepatitis GB virus A	-
encode_RC3H1_1	7	1	1000	0.83	0.871699	0.563966	0.98626	GCF_000847425.1	IV	RC3H1	Flaviviridae	NC_001837.1 Hepatitis GB virus A	+
encode_RC3H1_1	7	2	1000	0.744	0.821669	0.171232	1	GCF_000847425.1	IV	RC3H1	Flaviviridae	NC_001837.1 Hepatitis GB virus A	-
1053	5	8	1000	7.064	2.59897	0.703338	1	GCF_000847425.1	IV	RBMY1A1	Flaviviridae	NC_001837.1 Hepatitis GB virus A	+
1053	5	16	1000	11.632	3.35079	0.18606	1	GCF_000847425.1	IV	RBMY1A1	Flaviviridae	NC_001837.1 Hepatitis GB virus A	-
1175	7	2	1000	3.11	1.80309	0.776364	1	GCF_000847425.1	IV	SNRPA	Flaviviridae	NC_001837.1 Hepatitis GB virus A	+
1175	7	1	1000	3.09	1.75698	0.38611	1	GCF_000847425.1	IV	SNRPA	Flaviviridae	NC_001837.1 Hepatitis GB virus A	-
126	7	18	1000	16.758	4.252	0.71306	1	GCF_000847425.1	IV	SRSF1	Flaviviridae	NC_001837.1 Hepatitis GB virus A	+
126	7	48	1000	45.976	6.57805	0.767071	1	GCF_000847425.1	IV	SRSF1	Flaviviridae	NC_001837.1 Hepatitis GB virus A	-
1334	8	13	1000	13.812	3.72808	1	1	GCF_000847425.1	IV	SRSF2	Flaviviridae	NC_001837.1 Hepatitis GB virus A	+
1334	8	20	1000	15.285	3.83151	0.24616	1	GCF_000847425.1	IV	SRSF2	Flaviviridae	NC_001837.1 Hepatitis GB virus A	-
1384	7	23	1000	23.962	4.91882	1	1	GCF_000847425.1	IV	SRSF6	Flaviviridae	NC_001837.1 Hepatitis GB virus A	+
1384	7	30	1000	24.13	4.83658	0.220733	1	GCF_000847425.1	IV	SRSF6	Flaviviridae	NC_001837.1 Hepatitis GB virus A	-
169	7	2	1000	1.454	1.13806	0.660282	1	GCF_000847425.1	IV	HNRNPLL	Flaviviridae	NC_001837.1 Hepatitis GB virus A	+
169	7	1	1000	2.957	1.70824	0.383154	1	GCF_000847425.1	IV	HNRNPLL	Flaviviridae	NC_001837.1 Hepatitis GB virus A	-
175	8	3	1000	3.438	1.79035	1	1	GCF_000847425.1	IV	KHSRP	Flaviviridae	NC_001837.1 Hepatitis GB virus A	+
175	8	12	1000	6.076	2.48926	0.0241143	0.71904	GCF_000847425.1	IV	KHSRP	Flaviviridae	NC_001837.1 Hepatitis GB virus A	-
33	12	0	1000	0.042	0.205617	1	1	GCF_000847425.1	IV	G3BP1	Flaviviridae	NC_001837.1 Hepatitis GB virus A	+
33	12	1	1000	0.176	0.40889	0.161383	1	GCF_000847425.1	IV	G3BP1	Flaviviridae	NC_001837.1 Hepatitis GB virus A	-
351	7	10	1000	12.202	3.35924	0.666174	1	GCF_000847425.1	IV	EIF4B	Flaviviridae	NC_001837.1 Hepatitis GB virus A	+
351	7	7	1000	8.492	2.84042	0.732505	1	GCF_000847425.1	IV	EIF4B	Flaviviridae	NC_001837.1 Hepatitis GB virus A	-
352	4	93	1000	96.262	8.23864	0.797755	1	GCF_000847425.1	IV	EIF4B	Flaviviridae	NC_001837.1 Hepatitis GB virus A	+
352	4	60	1000	77.425	7.41575	0.0456849	0.71904	GCF_000847425.1	IV	EIF4B	Flaviviridae	NC_001837.1 Hepatitis GB virus A	-
72	6	5	1000	4.291	2.12952	0.626256	1	GCF_000847425.1	IV	HNRNPA1	Flaviviridae	NC_001837.1 Hepatitis GB virus A	+
72	6	4	1000	2.95	1.69481	0.548261	1	GCF_000847425.1	IV	HNRNPA1	Flaviviridae	NC_001837.1 Hepatitis GB virus A	-
948	11	0	1000	0.09	0.299983	1	1	GCF_000847425.1	IV	SNRPA	Flaviviridae	NC_001837.1 Hepatitis GB virus A	+
948	11	2	1000	0.095	0.316346	0.00423625	0.613274	GCF_000847425.1	IV	SNRPA	Flaviviridae	NC_001837.1 Hepatitis GB virus A	-
M001_0.6	7	1	1000	1.428	1.1481	1	1	GCF_000847425.1	IV	A1CF	Flaviviridae	NC_001837.1 Hepatitis GB virus A	+
M001_0.6	7	0	1000	1.052	1.05376	0.632582	1	GCF_000847425.1	IV	A1CF	Flaviviridae	NC_001837.1 Hepatitis GB virus A	-
M012_0.6	7	1	1000	1.572	1.3626	1	1	GCF_000847425.1	IV	CPEB2	Flaviviridae	NC_001837.1 Hepatitis GB virus A	+
M012_0.6	7	2	1000	0.912	1.0693	0.23191	1	GCF_000847425.1	IV	CPEB2	Flaviviridae	NC_001837.1 Hepatitis GB virus A	-
M013_0.6	7	2	1000	1.484	1.24792	0.663521	1	GCF_000847425.1	IV	DAZAP1	Flaviviridae	NC_001837.1 Hepatitis GB virus A	+
M013_0.6	7	1	1000	1.258	1.15011	1	1	GCF_000847425.1	IV	DAZAP1	Flaviviridae	NC_001837.1 Hepatitis GB virus A	-
M019_0.6	7	1	1000	1.557	1.32458	1	1	GCF_000847425.1	IV	SRSF10	Flaviviridae	NC_001837.1 Hepatitis GB virus A	+
M019_0.6	7	3	1000	3.438	1.90415	1	1	GCF_000847425.1	IV	SRSF10	Flaviviridae	NC_001837.1 Hepatitis GB virus A	-
M023_0.6	7	3	1000	3.021	1.78262	1	1	GCF_000847425.1	IV	HNRNPA1L2	Flaviviridae	NC_001837.1 Hepatitis GB virus A	+
M023_0.6	7	1	1000	2.094	1.41745	0.72988	1	GCF_000847425.1	IV	HNRNPA1L2	Flaviviridae	NC_001837.1 Hepatitis GB virus A	-
M024_0.6	6	5	1000	4.312	2.13617	0.627683	1	GCF_000847425.1	IV	HNRNPA2B1	Flaviviridae	NC_001837.1 Hepatitis GB virus A	+
M024_0.6	6	4	1000	2.984	1.70548	0.550687	1	GCF_000847425.1	IV	HNRNPA2B1	Flaviviridae	NC_001837.1 Hepatitis GB virus A	-
M025_0.6	7	1	1000	1.248	1.31233	1	1	GCF_000847425.1	IV	HNRNPC	Flaviviridae	NC_001837.1 Hepatitis GB virus A	+
M025_0.6	7	1	1000	0.713	0.963098	0.509842	1	GCF_000847425.1	IV	HNRNPC	Flaviviridae	NC_001837.1 Hepatitis GB virus A	-
M027_0.6	7	1	1000	1.869	1.46765	1	1	GCF_000847425.1	IV	HNRNPL	Flaviviridae	NC_001837.1 Hepatitis GB virus A	+
M027_0.6	7	9	1000	6.636	2.84035	0.327521	1	GCF_000847425.1	IV	HNRNPL	Flaviviridae	NC_001837.1 Hepatitis GB virus A	-
M036_0.6	7	2	1000	1.478	1.2004	0.662864	1	GCF_000847425.1	IV	MATR3	Flaviviridae	NC_001837.1 Hepatitis GB virus A	+
M036_0.6	7	1	1000	1.255	1.11679	1	1	GCF_000847425.1	IV	MATR3	Flaviviridae	NC_001837.1 Hepatitis GB virus A	-
M037_0.6	6	5	1000	4.418	2.2177	0.635231	1	GCF_000847425.1	IV	MBNL1	Flaviviridae	NC_001837.1 Hepatitis GB virus A	+
M037_0.6	6	1	1000	2.398	1.59754	0.73862	1	GCF_000847425.1	IV	MBNL1	Flaviviridae	NC_001837.1 Hepatitis GB virus A	-
M040_0.6	7	1	1000	1.167	1.0818	1	1	GCF_000847425.1	IV	MSI1	Flaviviridae	NC_001837.1 Hepatitis GB virus A	+
M040_0.6	7	4	1000	0.979	0.987692	0.0177214	0.71904	GCF_000847425.1	IV	MSI1	Flaviviridae	NC_001837.1 Hepatitis GB virus A	-
M046_0.6	7	1	1000	0.965	0.976078	0.619035	1	GCF_000847425.1	IV	QKI	Flaviviridae	NC_001837.1 Hepatitis GB virus A	+
M046_0.6	7	1	1000	1.264	1.15223	1	1	GCF_000847425.1	IV	QKI	Flaviviridae	NC_001837.1 Hepatitis GB virus A	-
M050_0.6	7	3	1000	2.538	1.56237	0.745462	1	GCF_000847425.1	IV	RBM14	Flaviviridae	NC_001837.1 Hepatitis GB virus A	+
M050_0.6	7	4	1000	1.699	1.42001	0.0930226	0.915223	GCF_000847425.1	IV	RBM14	Flaviviridae	NC_001837.1 Hepatitis GB virus A	-
M052_0.6	7	2	1000	2.292	1.54179	1	1	GCF_000847425.1	IV	RBM46	Flaviviridae	NC_001837.1 Hepatitis GB virus A	+
M052_0.6	7	4	1000	3.432	1.86033	0.591846	1	GCF_000847425.1	IV	RBM46	Flaviviridae	NC_001837.1 Hepatitis GB virus A	-
M061_0.6	7	11	1000	12.714	3.4843	0.778214	1	GCF_000847425.1	IV	SAMD4A	Flaviviridae	NC_001837.1 Hepatitis GB virus A	+
M061_0.6	7	7	1000	6.838	2.51795	0.847715	1	GCF_000847425.1	IV	SAMD4A	Flaviviridae	NC_001837.1 Hepatitis GB virus A	-
M068_0.6	7	2	1000	1.841	1.37171	0.707905	1	GCF_000847425.1	IV	SNRNP70	Flaviviridae	NC_001837.1 Hepatitis GB virus A	+
M068_0.6	7	5	1000	3.728	1.95495	0.4318	1	GCF_000847425.1	IV	SNRNP70	Flaviviridae	NC_001837.1 Hepatitis GB virus A	-
M070_0.6	8	4	1000	3.382	1.84756	0.586568	1	GCF_000847425.1	IV	SRSF2	Flaviviridae	NC_001837.1 Hepatitis GB virus A	+
M070_0.6	8	3	1000	3.415	1.8265	1	1	GCF_000847425.1	IV	SRSF2	Flaviviridae	NC_001837.1 Hepatitis GB virus A	-
M072_0.6	7	3	1000	3.012	1.66752	1	1	GCF_000847425.1	IV	SRSF9	Flaviviridae	NC_001837.1 Hepatitis GB virus A	+
M072_0.6	7	7	1000	5.264	2.3073	0.381359	1	GCF_000847425.1	IV	SRSF9	Flaviviridae	NC_001837.1 Hepatitis GB virus A	-
M074_0.6	6	7	1000	7.694	2.71951	1	1	GCF_000847425.1	IV	TARDBP	Flaviviridae	NC_001837.1 Hepatitis GB virus A	+
M074_0.6	6	4	1000	3.969	1.93489	0.80311	1	GCF_000847425.1	IV	TARDBP	Flaviviridae	NC_001837.1 Hepatitis GB virus A	-
M082_0.6	6	2	1000	2.258	1.50123	1	1	GCF_000847425.1	IV	YBX2	Flaviviridae	NC_001837.1 Hepatitis GB virus A	+
M082_0.6	6	7	1000	5.688	2.42952	0.524914	1	GCF_000847425.1	IV	YBX2	Flaviviridae	NC_001837.1 Hepatitis GB virus A	-
M087_0.6	7	1	1000	1.889	1.44802	1	1	GCF_000847425.1	IV	SRSF10	Flaviviridae	NC_001837.1 Hepatitis GB virus A	+
M087_0.6	7	3	1000	3.586	1.98861	1	1	GCF_000847425.1	IV	SRSF10	Flaviviridae	NC_001837.1 Hepatitis GB virus A	-
M088_0.6	7	2	1000	2.015	1.49164	1	1	GCF_000847425.1	IV	SRSF10	Flaviviridae	NC_001837.1 Hepatitis GB virus A	+
M088_0.6	7	5	1000	4.44	2.17742	0.636865	1	GCF_000847425.1	IV	SRSF10	Flaviviridae	NC_001837.1 Hepatitis GB virus A	-
M089_0.6	7	2	1000	2.932	1.66137	1	1	GCF_000847425.1	IV	HNRNPL	Flaviviridae	NC_001837.1 Hepatitis GB virus A	+
M089_0.6	7	8	1000	8.088	2.69658	1	1	GCF_000847425.1	IV	HNRNPL	Flaviviridae	NC_001837.1 Hepatitis GB virus A	-
M106_0.6	7	3	1000	4.531	2.13204	0.639387	1	GCF_000847425.1	IV	SRSF1	Flaviviridae	NC_001837.1 Hepatitis GB virus A	+
M106_0.6	7	6	1000	8.336	3.09138	0.59977	1	GCF_000847425.1	IV	SRSF1	Flaviviridae	NC_001837.1 Hepatitis GB virus A	-
M109_0.6	7	2	1000	3.525	1.83868	0.595463	1	GCF_000847425.1	IV	RBM14	Flaviviridae	NC_001837.1 Hepatitis GB virus A	+
M109_0.6	7	2	1000	1.629	1.31875	0.680501	1	GCF_000847425.1	IV	RBM14	Flaviviridae	NC_001837.1 Hepatitis GB virus A	-
M111_0.6	7	1	1000	1.466	1.19259	1	1	GCF_000847425.1	IV	YBX1	Flaviviridae	NC_001837.1 Hepatitis GB virus A	+
M111_0.6	7	9	1000	4.441	2.08347	0.0493216	0.742497	GCF_000847425.1	IV	YBX1	Flaviviridae	NC_001837.1 Hepatitis GB virus A	-
M140_0.6	7	3	1000	3.737	2.02977	1	1	GCF_000847425.1	IV	ENOX1	Flaviviridae	NC_001837.1 Hepatitis GB virus A	+
M140_0.6	7	4	1000	7.576	2.63765	0.2708	1	GCF_000847425.1	IV	ENOX1	Flaviviridae	NC_001837.1 Hepatitis GB virus A	-
M142_0.6	7	0	1000	0.792	0.870341	1	1	GCF_000847425.1	IV	RBM42	Flaviviridae	NC_001837.1 Hepatitis GB virus A	+
M142_0.6	7	1	1000	0.699	0.822846	0.502931	1	GCF_000847425.1	IV	RBM42	Flaviviridae	NC_001837.1 Hepatitis GB virus A	-
M144_0.6	7	0	1000	1.009	0.98686	0.632116	1	GCF_000847425.1	IV	PABPC3	Flaviviridae	NC_001837.1 Hepatitis GB virus A	+
M144_0.6	7	2	1000	2.057	1.45116	1	1	GCF_000847425.1	IV	PABPC3	Flaviviridae	NC_001837.1 Hepatitis GB virus A	-
M147_0.6	6	7	1000	6.593	2.57371	0.843688	1	GCF_000847425.1	IV	CNOT4	Flaviviridae	NC_001837.1 Hepatitis GB virus A	+
M147_0.6	6	10	1000	14.263	3.67087	0.350614	1	GCF_000847425.1	IV	CNOT4	Flaviviridae	NC_001837.1 Hepatitis GB virus A	-
M148_0.6	6	3	1000	2.614	1.66186	0.749751	1	GCF_000847425.1	IV	PABPN1	Flaviviridae	NC_001837.1 Hepatitis GB virus A	+
M148_0.6	6	5	1000	5.118	2.26831	1	1	GCF_000847425.1	IV	PABPN1	Flaviviridae	NC_001837.1 Hepatitis GB virus A	-
M149_0.6	7	1	1000	1.038	1.30854	1	1	GCF_000847425.1	IV	CPEB4	Flaviviridae	NC_001837.1 Hepatitis GB virus A	+
M149_0.6	7	0	1000	0.531	0.888723	1	1	GCF_000847425.1	IV	CPEB4	Flaviviridae	NC_001837.1 Hepatitis GB virus A	-
M150_0.6	7	1	1000	0.915	1.22527	0.599501	1	GCF_000847425.1	IV	RALY	Flaviviridae	NC_001837.1 Hepatitis GB virus A	+
M150_0.6	7	0	1000	0.446	0.830526	1	1	GCF_000847425.1	IV	RALY	Flaviviridae	NC_001837.1 Hepatitis GB virus A	-
M154_0.6	7	5	1000	5.541	2.22604	1	1	GCF_000847425.1	IV	SRSF1	Flaviviridae	NC_001837.1 Hepatitis GB virus A	+
M154_0.6	7	3	1000	3.336	1.83915	1	1	GCF_000847425.1	IV	SRSF1	Flaviviridae	NC_001837.1 Hepatitis GB virus A	-
M158_0.6	7	1	1000	1.247	1.3129	1	1	GCF_000847425.1	IV	HNRNPCL1	Flaviviridae	NC_001837.1 Hepatitis GB virus A	+
M158_0.6	7	1	1000	0.712	0.96228	0.509351	1	GCF_000847425.1	IV	HNRNPCL1	Flaviviridae	NC_001837.1 Hepatitis GB virus A	-
M159_0.6	7	5	1000	5.593	2.29273	1	1	GCF_000847425.1	IV	RBFOX1	Flaviviridae	NC_001837.1 Hepatitis GB virus A	+
M159_0.6	7	5	1000	4.322	2.19297	0.628371	1	GCF_000847425.1	IV	RBFOX1	Flaviviridae	NC_001837.1 Hepatitis GB virus A	-
M160_0.6	7	0	1000	0.321	0.546129	1	1	GCF_000847425.1	IV	KHDRBS1	Flaviviridae	NC_001837.1 Hepatitis GB virus A	+
M160_0.6	7	2	1000	0.609	0.796714	0.12487	0.961762	GCF_000847425.1	IV	KHDRBS1	Flaviviridae	NC_001837.1 Hepatitis GB virus A	-
M161_0.6	7	2	1000	1.66	1.3199	0.68436	1	GCF_000847425.1	IV	RBM6	Flaviviridae	NC_001837.1 Hepatitis GB virus A	+
M161_0.6	7	3	1000	4.919	2.25156	0.646335	1	GCF_000847425.1	IV	RBM6	Flaviviridae	NC_001837.1 Hepatitis GB virus A	-
M164_0.6	6	1	1000	0.867	0.966564	0.579806	1	GCF_000847425.1	IV	RBMS3	Flaviviridae	NC_001837.1 Hepatitis GB virus A	+
M164_0.6	6	0	1000	1.283	1.14901	0.64433	1	GCF_000847425.1	IV	RBMS3	Flaviviridae	NC_001837.1 Hepatitis GB virus A	-
M167_0.6	7	1	1000	1.709	1.31607	1	1	GCF_000847425.1	IV	MSI1	Flaviviridae	NC_001837.1 Hepatitis GB virus A	+
M167_0.6	7	4	1000	1.589	1.27582	0.0772887	0.915223	GCF_000847425.1	IV	MSI1	Flaviviridae	NC_001837.1 Hepatitis GB virus A	-
M178_0.6	7	15	1000	15.021	3.77555	1	1	GCF_000847425.1	IV	CELF6	Flaviviridae	NC_001837.1 Hepatitis GB virus A	+
M178_0.6	7	1	1000	3.607	1.90162	0.281764	1	GCF_000847425.1	IV	CELF6	Flaviviridae	NC_001837.1 Hepatitis GB virus A	-
M227_0.6	7	3	1000	2.458	1.53316	0.74137	1	GCF_000847425.1	IV	PTBP1	Flaviviridae	NC_001837.1 Hepatitis GB virus A	+
M227_0.6	7	0	1000	1.502	1.15816	0.414304	1	GCF_000847425.1	IV	PTBP1	Flaviviridae	NC_001837.1 Hepatitis GB virus A	-
M246_0.6	5	12	1000	13.931	3.54327	0.787387	1	GCF_000847425.1	IV	RBMY1A1	Flaviviridae	NC_001837.1 Hepatitis GB virus A	+
M246_0.6	5	41	1000	30.959	5.08204	0.0859758	0.915223	GCF_000847425.1	IV	RBMY1A1	Flaviviridae	NC_001837.1 Hepatitis GB virus A	-
M256_0.6	6	10	1000	10.521	3.15936	1	1	GCF_000847425.1	IV	ACO1	Flaviviridae	NC_001837.1 Hepatitis GB virus A	+
M256_0.6	6	9	1000	13.395	3.61497	0.273503	1	GCF_000847425.1	IV	ACO1	Flaviviridae	NC_001837.1 Hepatitis GB virus A	-
M271_0.6	6	5	1000	4.301	2.13236	0.626933	1	GCF_000847425.1	IV	HNRNPA1	Flaviviridae	NC_001837.1 Hepatitis GB virus A	+
M271_0.6	6	4	1000	2.972	1.7018	0.549817	1	GCF_000847425.1	IV	HNRNPA1	Flaviviridae	NC_001837.1 Hepatitis GB virus A	-
M272_0.6	8	0	1000	1.01	1.03391	0.63212	1	GCF_000847425.1	IV	SRSF1	Flaviviridae	NC_001837.1 Hepatitis GB virus A	+
M272_0.6	8	1	1000	1.378	1.16296	1	1	GCF_000847425.1	IV	SRSF1	Flaviviridae	NC_001837.1 Hepatitis GB virus A	-
M320_0.6	8	9	1000	7.696	2.69237	0.585669	1	GCF_000847425.1	IV	MBNL1	Flaviviridae	NC_001837.1 Hepatitis GB virus A	+
M320_0.6	8	5	1000	3.926	1.9236	0.605794	1	GCF_000847425.1	IV	MBNL1	Flaviviridae	NC_001837.1 Hepatitis GB virus A	-
M347_0.6	11	0	1000	0.09	0.299983	1	1	GCF_000847425.1	IV	SNRPA	Flaviviridae	NC_001837.1 Hepatitis GB virus A	+
M347_0.6	11	2	1000	0.097	0.318893	0.00441066	0.613274	GCF_000847425.1	IV	SNRPA	Flaviviridae	NC_001837.1 Hepatitis GB virus A	-
M349_0.6	7	3	1000	3.474	1.8354	1	1	GCF_000847425.1	IV	PABPC1	Flaviviridae	NC_001837.1 Hepatitis GB virus A	+
M349_0.6	7	5	1000	6.452	2.41982	0.841912	1	GCF_000847425.1	IV	PABPC1	Flaviviridae	NC_001837.1 Hepatitis GB virus A	-
encode_BOLL_2	6	6	1000	5.823	2.39278	0.834897	1	GCF_000847425.1	IV	BOLL	Flaviviridae	NC_001837.1 Hepatitis GB virus A	+
encode_BOLL_2	6	1	1000	3.57	1.85055	0.280363	1	GCF_000847425.1	IV	BOLL	Flaviviridae	NC_001837.1 Hepatitis GB virus A	-
encode_CNOT4_1	6	7	1000	9.281	3.04718	0.619668	1	GCF_000847425.1	IV	CNOT4	Flaviviridae	NC_001837.1 Hepatitis GB virus A	+
encode_CNOT4_1	6	30	1000	25.095	4.77208	0.316384	1	GCF_000847425.1	IV	CNOT4	Flaviviridae	NC_001837.1 Hepatitis GB virus A	-
encode_DAZ3_3	6	5	1000	5.404	2.3951	1	1	GCF_000847425.1	IV	DAZ3	Flaviviridae	NC_001837.1 Hepatitis GB virus A	+
encode_DAZ3_3	6	4	1000	4.088	1.96777	1	1	GCF_000847425.1	IV	DAZ3	Flaviviridae	NC_001837.1 Hepatitis GB virus A	-
encode_DAZAP1_1	6	1	1000	1.288	1.15689	1	1	GCF_000847425.1	IV	DAZAP1	Flaviviridae	NC_001837.1 Hepatitis GB virus A	+
encode_DAZAP1_1	6	0	1000	1.643	1.31958	0.421175	1	GCF_000847425.1	IV	DAZAP1	Flaviviridae	NC_001837.1 Hepatitis GB virus A	-
encode_EIF4G2_1	6	19	1000	17.845	4.00512	0.722011	1	GCF_000847425.1	IV	EIF4G2	Flaviviridae	NC_001837.1 Hepatitis GB virus A	+
encode_EIF4G2_1	6	16	1000	11.638	3.25324	0.186271	1	GCF_000847425.1	IV	EIF4G2	Flaviviridae	NC_001837.1 Hepatitis GB virus A	-
encode_FUBP3_3	5	2	1000	2.436	1.52782	1	1	GCF_000847425.1	IV	FUBP3	Flaviviridae	NC_001837.1 Hepatitis GB virus A	+
encode_FUBP3_3	5	0	1000	2.039	1.39335	0.280093	1	GCF_000847425.1	IV	FUBP3	Flaviviridae	NC_001837.1 Hepatitis GB virus A	-
encode_HNRNPA2B1_1	5	67	1000	63.463	9.86275	0.658925	1	GCF_000847425.1	IV	HNRNPA2B1	Flaviviridae	NC_001837.1 Hepatitis GB virus A	+
encode_HNRNPA2B1_1	5	34	1000	31.817	6.48842	0.656845	1	GCF_000847425.1	IV	HNRNPA2B1	Flaviviridae	NC_001837.1 Hepatitis GB virus A	-
encode_HNRNPD_1	5	2	1000	1.701	1.29123	0.689558	1	GCF_000847425.1	IV	HNRNPD	Flaviviridae	NC_001837.1 Hepatitis GB virus A	+
encode_HNRNPD_1	5	0	1000	1.557	1.23543	0.416323	1	GCF_000847425.1	IV	HNRNPD	Flaviviridae	NC_001837.1 Hepatitis GB virus A	-
encode_HNRNPH2_1	6	62	1000	60.833	9.67847	0.846956	1	GCF_000847425.1	IV	HNRNPH2	Flaviviridae	NC_001837.1 Hepatitis GB virus A	+
encode_HNRNPH2_1	6	29	1000	23.29	5.71214	0.251771	1	GCF_000847425.1	IV	HNRNPH2	Flaviviridae	NC_001837.1 Hepatitis GB virus A	-
encode_KHDRBS2_1	5	6	1000	7.559	2.62629	0.716179	1	GCF_000847425.1	IV	KHDRBS2	Flaviviridae	NC_001837.1 Hepatitis GB virus A	+
encode_KHDRBS2_1	5	6	1000	9.468	2.93932	0.328051	1	GCF_000847425.1	IV	KHDRBS2	Flaviviridae	NC_001837.1 Hepatitis GB virus A	-
encode_KHSRP_2	5	9	1000	7.622	3.07418	0.583082	1	GCF_000847425.1	IV	KHSRP	Flaviviridae	NC_001837.1 Hepatitis GB virus A	+
encode_KHSRP_2	5	4	1000	4.421	2.29151	1	1	GCF_000847425.1	IV	KHSRP	Flaviviridae	NC_001837.1 Hepatitis GB virus A	-
encode_MBNL1_2	7	5	1000	5.728	2.2652	1	1	GCF_000847425.1	IV	MBNL1	Flaviviridae	NC_001837.1 Hepatitis GB virus A	+
encode_MBNL1_2	7	8	1000	9.216	2.9897	0.868518	1	GCF_000847425.1	IV	MBNL1	Flaviviridae	NC_001837.1 Hepatitis GB virus A	-
encode_PCBP2_2	5	22	1000	22.564	4.51357	1	1	GCF_000847425.1	IV	PCBP2	Flaviviridae	NC_001837.1 Hepatitis GB virus A	+
encode_PCBP2_2	5	28	1000	38.192	5.54002	0.104471	0.915223	GCF_000847425.1	IV	PCBP2	Flaviviridae	NC_001837.1 Hepatitis GB virus A	-
encode_PCBP2_3	5	7	1000	8.07	2.77034	0.860397	1	GCF_000847425.1	IV	PCBP2	Flaviviridae	NC_001837.1 Hepatitis GB virus A	+
encode_PCBP2_3	5	15	1000	17.524	4.04571	0.632718	1	GCF_000847425.1	IV	PCBP2	Flaviviridae	NC_001837.1 Hepatitis GB virus A	-
encode_PCBP4_2	5	11	1000	11.402	3.35494	1	1	GCF_000847425.1	IV	PCBP4	Flaviviridae	NC_001837.1 Hepatitis GB virus A	+
encode_PCBP4_2	5	7	1000	8.065	2.60722	0.860392	1	GCF_000847425.1	IV	PCBP4	Flaviviridae	NC_001837.1 Hepatitis GB virus A	-
encode_PRR3_3	5	5	1000	5.727	2.36602	1	1	GCF_000847425.1	IV	PRR3	Flaviviridae	NC_001837.1 Hepatitis GB virus A	+
encode_PRR3_3	5	6	1000	5.25	2.31535	0.659421	1	GCF_000847425.1	IV	PRR3	Flaviviridae	NC_001837.1 Hepatitis GB virus A	-
encode_PUF60_2	5	11	1000	9.6	3.16734	0.625323	1	GCF_000847425.1	IV	PUF60	Flaviviridae	NC_001837.1 Hepatitis GB virus A	+
encode_PUF60_2	5	6	1000	5.685	2.4791	0.831884	1	GCF_000847425.1	IV	PUF60	Flaviviridae	NC_001837.1 Hepatitis GB virus A	-
encode_PUM1_2	5	1	1000	2.298	1.45853	0.73472	1	GCF_000847425.1	IV	PUM1	Flaviviridae	NC_001837.1 Hepatitis GB virus A	+
encode_PUM1_2	5	2	1000	2.216	1.46201	1	1	GCF_000847425.1	IV	PUM1	Flaviviridae	NC_001837.1 Hepatitis GB virus A	-
encode_RALYL_1	5	16	1000	14.354	3.92327	0.597117	1	GCF_000847425.1	IV	RALYL	Flaviviridae	NC_001837.1 Hepatitis GB virus A	+
encode_RALYL_1	5	9	1000	8.322	3.02382	0.727856	1	GCF_000847425.1	IV	RALYL	Flaviviridae	NC_001837.1 Hepatitis GB virus A	-
encode_RBM25_1	6	70	1000	71.812	8.01866	0.905625	1	GCF_000847425.1	IV	RBM25	Flaviviridae	NC_001837.1 Hepatitis GB virus A	+
encode_RBM25_1	6	29	1000	31.001	5.0088	0.787516	1	GCF_000847425.1	IV	RBM25	Flaviviridae	NC_001837.1 Hepatitis GB virus A	-
encode_RBM45_1	5	24	1000	25.598	4.55754	0.843083	1	GCF_000847425.1	IV	RBM45	Flaviviridae	NC_001837.1 Hepatitis GB virus A	+
encode_RBM45_1	5	29	1000	34.231	5.28655	0.439972	1	GCF_000847425.1	IV	RBM45	Flaviviridae	NC_001837.1 Hepatitis GB virus A	-
encode_RBM45_3	5	26	1000	26.749	4.84143	1	1	GCF_000847425.1	IV	RBM45	Flaviviridae	NC_001837.1 Hepatitis GB virus A	+
encode_RBM45_3	5	14	1000	21.815	4.46797	0.106496	0.915223	GCF_000847425.1	IV	RBM45	Flaviviridae	NC_001837.1 Hepatitis GB virus A	-
encode_RBM45_4	5	7	1000	9.206	2.92029	0.618863	1	GCF_000847425.1	IV	RBM45	Flaviviridae	NC_001837.1 Hepatitis GB virus A	+
encode_RBM45_4	5	23	1000	22.534	4.29107	0.91571	1	GCF_000847425.1	IV	RBM45	Flaviviridae	NC_001837.1 Hepatitis GB virus A	-
encode_RBM47_1	5	6	1000	5.778	2.42706	0.833868	1	GCF_000847425.1	IV	RBM47	Flaviviridae	NC_001837.1 Hepatitis GB virus A	+
encode_RBM47_1	5	13	1000	10.679	3.12309	0.441672	1	GCF_000847425.1	IV	RBM47	Flaviviridae	NC_001837.1 Hepatitis GB virus A	-
encode_RBM4B_1	6	12	1000	12.275	3.45938	1	1	GCF_000847425.1	IV	RBM4B	Flaviviridae	NC_001837.1 Hepatitis GB virus A	+
encode_RBM4B_1	6	12	1000	7.478	2.86596	0.0984483	0.915223	GCF_000847425.1	IV	RBM4B	Flaviviridae	NC_001837.1 Hepatitis GB virus A	-
encode_RBM4_1	6	12	1000	12.717	3.50959	1	1	GCF_000847425.1	IV	RBM4	Flaviviridae	NC_001837.1 Hepatitis GB virus A	+
encode_RBM4_1	6	15	1000	9.529	3.1691	0.100583	0.915223	GCF_000847425.1	IV	RBM4	Flaviviridae	NC_001837.1 Hepatitis GB virus A	-
encode_RBMS2_1	5	8	1000	7.585	2.72878	0.854358	1	GCF_000847425.1	IV	RBMS2	Flaviviridae	NC_001837.1 Hepatitis GB virus A	+
encode_RBMS2_1	5	8	1000	7.573	2.72031	0.854224	1	GCF_000847425.1	IV	RBMS2	Flaviviridae	NC_001837.1 Hepatitis GB virus A	-
encode_RBMS3_1	4	8	1000	7.571	2.7211	0.854202	1	GCF_000847425.1	IV	RBMS3	Flaviviridae	NC_001837.1 Hepatitis GB virus A	+
encode_RBMS3_1	4	8	1000	7.571	2.7211	0.854202	1	GCF_000847425.1	IV	RBMS3	Flaviviridae	NC_001837.1 Hepatitis GB virus A	-
encode_SFPQ_2	5	7	1000	8.387	2.84452	0.861617	1	GCF_000847425.1	IV	SFPQ	Flaviviridae	NC_001837.1 Hepatitis GB virus A	+
encode_SFPQ_2	5	9	1000	5.635	2.30328	0.141051	1	GCF_000847425.1	IV	SFPQ	Flaviviridae	NC_001837.1 Hepatitis GB virus A	-
encode_SRSF10_1	5	29	1000	32.192	5.30616	0.658479	1	GCF_000847425.1	IV	SRSF10	Flaviviridae	NC_001837.1 Hepatitis GB virus A	+
encode_SRSF10_1	5	50	1000	50.137	6.36449	1	1	GCF_000847425.1	IV	SRSF10	Flaviviridae	NC_001837.1 Hepatitis GB virus A	-
encode_SRSF2_1	6	11	1000	12.228	3.38015	0.885805	1	GCF_000847425.1	IV	SRSF2	Flaviviridae	NC_001837.1 Hepatitis GB virus A	+
encode_SRSF2_1	6	31	1000	24.388	4.64791	0.185875	1	GCF_000847425.1	IV	SRSF2	Flaviviridae	NC_001837.1 Hepatitis GB virus A	-
encode_SRSF2_2	5	11	1000	9.897	3.11385	0.633572	1	GCF_000847425.1	IV	SRSF2	Flaviviridae	NC_001837.1 Hepatitis GB virus A	+
encode_SRSF2_2	5	21	1000	19.096	4.31711	0.645517	1	GCF_000847425.1	IV	SRSF2	Flaviviridae	NC_001837.1 Hepatitis GB virus A	-
encode_SRSF4_1	5	9	1000	8.652	2.82859	0.863834	1	GCF_000847425.1	IV	SRSF4	Flaviviridae	NC_001837.1 Hepatitis GB virus A	+
encode_SRSF4_1	5	24	1000	19.768	4.09719	0.31097	1	GCF_000847425.1	IV	SRSF4	Flaviviridae	NC_001837.1 Hepatitis GB virus A	-
encode_SRSF5_1	5	11	1000	11.639	3.38912	1	1	GCF_000847425.1	IV	SRSF5	Flaviviridae	NC_001837.1 Hepatitis GB virus A	+
encode_SRSF5_1	5	25	1000	20.471	4.32387	0.317334	1	GCF_000847425.1	IV	SRSF5	Flaviviridae	NC_001837.1 Hepatitis GB virus A	-
encode_TARDBP_2	5	17	1000	16.666	4.07124	0.902032	1	GCF_000847425.1	IV	TARDBP	Flaviviridae	NC_001837.1 Hepatitis GB virus A	+
encode_TARDBP_2	5	10	1000	10.341	3.00462	1	1	GCF_000847425.1	IV	TARDBP	Flaviviridae	NC_001837.1 Hepatitis GB virus A	-
encode_UNK_1	6	8	1000	9.115	3.00213	0.868278	1	GCF_000847425.1	IV	UNK	Flaviviridae	NC_001837.1 Hepatitis GB virus A	+
encode_UNK_1	6	7	1000	8.074	2.77276	0.860402	1	GCF_000847425.1	IV	UNK	Flaviviridae	NC_001837.1 Hepatitis GB virus A	-
encode_ZCRB1_1	5	10	1000	11.976	3.29762	0.665485	1	GCF_000847425.1	IV	ZCRB1	Flaviviridae	NC_001837.1 Hepatitis GB virus A	+
encode_ZCRB1_1	5	10	1000	11.98	3.29886	0.665486	1	GCF_000847425.1	IV	ZCRB1	Flaviviridae	NC_001837.1 Hepatitis GB virus A	-
encode_ZFP36_1	5	3	1000	4.423	2.08721	0.808637	1	GCF_000847425.1	IV	ZFP36	Flaviviridae	NC_001837.1 Hepatitis GB virus A	+
encode_ZFP36_1	5	2	1000	3.357	1.77784	0.780294	1	GCF_000847425.1	IV	ZFP36	Flaviviridae	NC_001837.1 Hepatitis GB virus A	-
s10	6	14	1000	13.647	3.30868	0.891689	1	GCF_000847425.1	IV	TIA1	Flaviviridae	NC_001837.1 Hepatitis GB virus A	+
s10	6	11	1000	8.463	2.64492	0.384777	1	GCF_000847425.1	IV	TIA1	Flaviviridae	NC_001837.1 Hepatitis GB virus A	-
s14	8	1	1000	1.035	1.00737	1	1	GCF_000847425.1	IV	HNRNPK	Flaviviridae	NC_001837.1 Hepatitis GB virus A	+
s14	8	3	1000	3.684	1.91097	1	1	GCF_000847425.1	IV	HNRNPK	Flaviviridae	NC_001837.1 Hepatitis GB virus A	-
s16	7	4	1000	4.556	2.11881	1	1	GCF_000847425.1	IV	HNRNPK	Flaviviridae	NC_001837.1 Hepatitis GB virus A	+
s16	7	8	1000	9.542	2.98918	0.74641	1	GCF_000847425.1	IV	HNRNPK	Flaviviridae	NC_001837.1 Hepatitis GB virus A	-
s32	6	5	1000	6.531	2.55609	0.696232	1	GCF_000847425.1	IV	HNRNPA1	Flaviviridae	NC_001837.1 Hepatitis GB virus A	+
s32	6	6	1000	5.002	2.16903	0.649062	1	GCF_000847425.1	IV	HNRNPA1	Flaviviridae	NC_001837.1 Hepatitis GB virus A	-
s34	6	7	1000	7.086	2.46753	1	1	GCF_000847425.1	IV	KHDRBS1	Flaviviridae	NC_001837.1 Hepatitis GB virus A	+
s34	6	11	1000	9.914	2.92902	0.634124	1	GCF_000847425.1	IV	KHDRBS1	Flaviviridae	NC_001837.1 Hepatitis GB virus A	-
s38	4	357	1000	367.443	16.8535	0.594755	1	GCF_000847425.1	IV	HNRNPL	Flaviviridae	NC_001837.1 Hepatitis GB virus A	+
s38	4	829	1000	799.405	21.9014	0.275673	1	GCF_000847425.1	IV	HNRNPL	Flaviviridae	NC_001837.1 Hepatitis GB virus A	-
s4	5	105	1000	100.278	10.109	0.615602	1	GCF_000847425.1	IV	CELF2	Flaviviridae	NC_001837.1 Hepatitis GB virus A	+
s4	5	32	1000	40.497	6.52891	0.206883	1	GCF_000847425.1	IV	CELF2	Flaviviridae	NC_001837.1 Hepatitis GB virus A	-
s40	7	2	1000	2.79	1.68129	1	1	GCF_000847425.1	IV	SRSF3	Flaviviridae	NC_001837.1 Hepatitis GB virus A	+
s40	7	6	1000	4.061	1.94809	0.311607	1	GCF_000847425.1	IV	SRSF3	Flaviviridae	NC_001837.1 Hepatitis GB virus A	-
s44	8	3	1000	4.242	1.98831	0.805963	1	GCF_000847425.1	IV	HNRNPDL	Flaviviridae	NC_001837.1 Hepatitis GB virus A	+
s44	8	15	1000	9.01	2.88587	0.0627491	0.873661	GCF_000847425.1	IV	HNRNPDL	Flaviviridae	NC_001837.1 Hepatitis GB virus A	-
s45	9	0	1000	0.321	0.583352	1	1	GCF_000847425.1	IV	SRSF7	Flaviviridae	NC_001837.1 Hepatitis GB virus A	+
s45	9	1	1000	0.452	0.65584	0.363653	1	GCF_000847425.1	IV	SRSF7	Flaviviridae	NC_001837.1 Hepatitis GB virus A	-
s5	6	40	1000	40.206	6.31993	1	1	GCF_000847425.1	IV	CELF2	Flaviviridae	NC_001837.1 Hepatitis GB virus A	+
s5	6	9	1000	14.614	3.90567	0.187412	1	GCF_000847425.1	IV	CELF2	Flaviviridae	NC_001837.1 Hepatitis GB virus A	-
s50	7	21	1000	19.226	4.27237	0.647079	1	GCF_000847425.1	IV	SRSF1	Flaviviridae	NC_001837.1 Hepatitis GB virus A	+
s50	7	27	1000	24.927	4.64793	0.616449	1	GCF_000847425.1	IV	SRSF1	Flaviviridae	NC_001837.1 Hepatitis GB virus A	-
s51	7	3	1000	3.35	1.8609	1	1	GCF_000847425.1	IV	SRSF1	Flaviviridae	NC_001837.1 Hepatitis GB virus A	+
s51	7	5	1000	5.074	2.30083	1	1	GCF_000847425.1	IV	SRSF1	Flaviviridae	NC_001837.1 Hepatitis GB virus A	-
s53	7	1	1000	2.364	1.53031	0.737194	1	GCF_000847425.1	IV	SRSF2	Flaviviridae	NC_001837.1 Hepatitis GB virus A	+
s53	7	1	1000	2.282	1.48684	0.734182	1	GCF_000847425.1	IV	SRSF2	Flaviviridae	NC_001837.1 Hepatitis GB virus A	-
s55	11	0	1000	0.12	0.354578	1	1	GCF_000847425.1	IV	SRSF2	Flaviviridae	NC_001837.1 Hepatitis GB virus A	+
s55	11	2	1000	0.119	0.361898	0.00654249	0.613274	GCF_000847425.1	IV	SRSF2	Flaviviridae	NC_001837.1 Hepatitis GB virus A	-
s63	4	26	1000	28.54	5.09867	0.707818	1	GCF_000847425.1	IV	TIAL1	Flaviviridae	NC_001837.1 Hepatitis GB virus A	+
s63	4	24	1000	35.851	5.53493	0.0444993	0.71904	GCF_000847425.1	IV	TIAL1	Flaviviridae	NC_001837.1 Hepatitis GB virus A	-
s68	4	53	1000	53.166	6.91667	1	1	GCF_000847425.1	IV	TIA1	Flaviviridae	NC_001837.1 Hepatitis GB virus A	+
s68	4	63	1000	58.262	7.01702	0.510924	1	GCF_000847425.1	IV	TIA1	Flaviviridae	NC_001837.1 Hepatitis GB virus A	-
s7	6	11	1000	9.954	2.93811	0.635455	1	GCF_000847425.1	IV	TIAL1	Flaviviridae	NC_001837.1 Hepatitis GB virus A	+
s7	6	8	1000	6.682	2.34913	0.557932	1	GCF_000847425.1	IV	TIAL1	Flaviviridae	NC_001837.1 Hepatitis GB virus A	-
s92	6	6	1000	7.057	2.55544	0.850977	1	GCF_000847425.1	IV	RBFOX1	Flaviviridae	NC_001837.1 Hepatitis GB virus A	+
s92	6	6	1000	5.89	2.46779	0.836508	1	GCF_000847425.1	IV	RBFOX1	Flaviviridae	NC_001837.1 Hepatitis GB virus A	-
107	8	0	1000	0.155	0.403904	1	1	GCF_000847425.1	IV	PUM2	Flaviviridae	NC_001837.1 Hepatitis GB virus A	+
107	8	0	1000	0.125	0.359867	1	1	GCF_000847425.1	IV	PUM2	Flaviviridae	NC_001837.1 Hepatitis GB virus A	-
114	8	0	1000	0.11	0.33766	1	1	GCF_000847425.1	IV	PUM1	Flaviviridae	NC_001837.1 Hepatitis GB virus A	+
114	8	0	1000	0.082	0.295573	1	1	GCF_000847425.1	IV	PUM1	Flaviviridae	NC_001837.1 Hepatitis GB virus A	-
116	8	0	1000	0.11	0.33766	1	1	GCF_000847425.1	IV	PUM2	Flaviviridae	NC_001837.1 Hepatitis GB virus A	+
116	8	0	1000	0.082	0.295573	1	1	GCF_000847425.1	IV	PUM2	Flaviviridae	NC_001837.1 Hepatitis GB virus A	-
129	8	0	1000	0.11	0.33766	1	1	GCF_000847425.1	IV	PUM2	Flaviviridae	NC_001837.1 Hepatitis GB virus A	+
129	8	0	1000	0.082	0.295573	1	1	GCF_000847425.1	IV	PUM2	Flaviviridae	NC_001837.1 Hepatitis GB virus A	-
149	7	0	1000	0.164	0.388915	1	1	GCF_000847425.1	IV	QKI	Flaviviridae	NC_001837.1 Hepatitis GB virus A	+
149	7	0	1000	0.141	0.362285	1	1	GCF_000847425.1	IV	QKI	Flaviviridae	NC_001837.1 Hepatitis GB virus A	-
151	8	0	1000	0.11	0.33766	1	1	GCF_000847425.1	IV	PUM1	Flaviviridae	NC_001837.1 Hepatitis GB virus A	+
151	8	0	1000	0.082	0.295573	1	1	GCF_000847425.1	IV	PUM1	Flaviviridae	NC_001837.1 Hepatitis GB virus A	-
221	11	0	1000	0.01	0.0995485	1	1	GCF_000847425.1	IV	ZFP36	Flaviviridae	NC_001837.1 Hepatitis GB virus A	+
221	11	0	1000	0.019	0.136593	1	1	GCF_000847425.1	IV	ZFP36	Flaviviridae	NC_001837.1 Hepatitis GB virus A	-
61	8	0	1000	0.029	0.16789	1	1	GCF_000847425.1	IV	KHSRP	Flaviviridae	NC_001837.1 Hepatitis GB virus A	+
61	8	0	1000	0.021	0.150272	1	1	GCF_000847425.1	IV	KHSRP	Flaviviridae	NC_001837.1 Hepatitis GB virus A	-
662	7	0	1000	0.541	0.721692	1	1	GCF_000847425.1	IV	SNRPA	Flaviviridae	NC_001837.1 Hepatitis GB virus A	+
662	7	0	1000	0.641	0.823892	1	1	GCF_000847425.1	IV	SNRPA	Flaviviridae	NC_001837.1 Hepatitis GB virus A	-
78	12	0	1000	0.006	0.0772656	1	1	GCF_000847425.1	IV	FMR1	Flaviviridae	NC_001837.1 Hepatitis GB virus A	+
78	12	0	1000	0.006	0.0772656	1	1	GCF_000847425.1	IV	FMR1	Flaviviridae	NC_001837.1 Hepatitis GB virus A	-
81	8	0	1000	0.08	0.282276	1	1	GCF_000847425.1	IV	KHSRP	Flaviviridae	NC_001837.1 Hepatitis GB virus A	+
81	8	0	1000	0.037	0.199175	1	1	GCF_000847425.1	IV	KHSRP	Flaviviridae	NC_001837.1 Hepatitis GB virus A	-
91	10	0	1000	0.067	0.254117	1	1	GCF_000847425.1	IV	FMR1	Flaviviridae	NC_001837.1 Hepatitis GB virus A	+
91	10	0	1000	0.027	0.168224	1	1	GCF_000847425.1	IV	FMR1	Flaviviridae	NC_001837.1 Hepatitis GB virus A	-
M042_0.6	7	0	1000	0.256	0.608962	1	1	GCF_000847425.1	IV	PABPC4	Flaviviridae	NC_001837.1 Hepatitis GB virus A	+
M042_0.6	7	0	1000	0.54	0.966092	1	1	GCF_000847425.1	IV	PABPC4	Flaviviridae	NC_001837.1 Hepatitis GB virus A	-
M055_0.6	7	0	1000	0.454	0.722777	1	1	GCF_000847425.1	IV	RBMS3	Flaviviridae	NC_001837.1 Hepatitis GB virus A	+
M055_0.6	7	0	1000	0.609	0.827529	1	1	GCF_000847425.1	IV	RBMS3	Flaviviridae	NC_001837.1 Hepatitis GB virus A	-
M062_0.6	7	0	1000	0.598	0.793111	1	1	GCF_000847425.1	IV	SART3	Flaviviridae	NC_001837.1 Hepatitis GB virus A	+
M062_0.6	7	0	1000	1.486	1.32573	0.413887	1	GCF_000847425.1	IV	SART3	Flaviviridae	NC_001837.1 Hepatitis GB virus A	-
M073_0.6	7	0	1000	0.796	0.849179	1	1	GCF_000847425.1	IV	TUT1	Flaviviridae	NC_001837.1 Hepatitis GB virus A	+
M073_0.6	7	0	1000	0.768	0.868868	1	1	GCF_000847425.1	IV	TUT1	Flaviviridae	NC_001837.1 Hepatitis GB virus A	-
M085_0.6	8	0	1000	0.767	0.897506	1	1	GCF_000847425.1	IV	ZCRB1	Flaviviridae	NC_001837.1 Hepatitis GB virus A	+
M085_0.6	8	0	1000	0.706	0.834422	1	1	GCF_000847425.1	IV	ZCRB1	Flaviviridae	NC_001837.1 Hepatitis GB virus A	-
M112_0.6	7	0	1000	1.327	1.13197	0.647968	1	GCF_000847425.1	IV	ELAVL1	Flaviviridae	NC_001837.1 Hepatitis GB virus A	+
M112_0.6	7	0	1000	0.458	0.68462	1	1	GCF_000847425.1	IV	ELAVL1	Flaviviridae	NC_001837.1 Hepatitis GB virus A	-
M143_0.6	7	0	1000	0.502	0.722854	1	1	GCF_000847425.1	IV	RBMS1	Flaviviridae	NC_001837.1 Hepatitis GB virus A	+
M143_0.6	7	0	1000	0.516	0.721293	1	1	GCF_000847425.1	IV	RBMS1	Flaviviridae	NC_001837.1 Hepatitis GB virus A	-
M146_0.6	7	0	1000	0.598	0.793111	1	1	GCF_000847425.1	IV	PABPC1	Flaviviridae	NC_001837.1 Hepatitis GB virus A	+
M146_0.6	7	0	1000	1.485	1.3227	0.413864	1	GCF_000847425.1	IV	PABPC1	Flaviviridae	NC_001837.1 Hepatitis GB virus A	-
M269_0.6	11	0	1000	0.01	0.0995485	1	1	GCF_000847425.1	IV	ZFP36	Flaviviridae	NC_001837.1 Hepatitis GB virus A	+
M269_0.6	11	0	1000	0.02	0.14007	1	1	GCF_000847425.1	IV	ZFP36	Flaviviridae	NC_001837.1 Hepatitis GB virus A	-
M274_0.6	9	0	1000	0.249	0.480864	1	1	GCF_000847425.1	IV	SRSF2	Flaviviridae	NC_001837.1 Hepatitis GB virus A	+
M274_0.6	9	0	1000	0.267	0.509873	1	1	GCF_000847425.1	IV	SRSF2	Flaviviridae	NC_001837.1 Hepatitis GB virus A	-
M296_0.6	11	0	1000	0.02	0.14007	1	1	GCF_000847425.1	IV	IGF2BP1	Flaviviridae	NC_001837.1 Hepatitis GB virus A	+
M296_0.6	11	0	1000	0.04	0.201098	1	1	GCF_000847425.1	IV	IGF2BP1	Flaviviridae	NC_001837.1 Hepatitis GB virus A	-
M319_0.6	7	0	1000	0.54	0.72036	1	1	GCF_000847425.1	IV	SNRPA	Flaviviridae	NC_001837.1 Hepatitis GB virus A	+
M319_0.6	7	0	1000	0.639	0.823017	1	1	GCF_000847425.1	IV	SNRPA	Flaviviridae	NC_001837.1 Hepatitis GB virus A	-
M329_0.6	9	0	1000	0.039	0.193692	1	1	GCF_000847425.1	IV	ELAVL2	Flaviviridae	NC_001837.1 Hepatitis GB virus A	+
M329_0.6	9	0	1000	0.009	0.0944877	1	1	GCF_000847425.1	IV	ELAVL2	Flaviviridae	NC_001837.1 Hepatitis GB virus A	-
M331_0.6	10	0	1000	0.073	0.27156	1	1	GCF_000847425.1	IV	SRSF7	Flaviviridae	NC_001837.1 Hepatitis GB virus A	+
M331_0.6	10	0	1000	0.082	0.285232	1	1	GCF_000847425.1	IV	SRSF7	Flaviviridae	NC_001837.1 Hepatitis GB virus A	-
M345_0.6	11	0	1000	0.042	0.205617	1	1	GCF_000847425.1	IV	SNRPA	Flaviviridae	NC_001837.1 Hepatitis GB virus A	+
M345_0.6	11	0	1000	0.046	0.223459	1	1	GCF_000847425.1	IV	SNRPA	Flaviviridae	NC_001837.1 Hepatitis GB virus A	-
M350_0.6	9	0	1000	0.034	0.18132	1	1	GCF_000847425.1	IV	ZFP36	Flaviviridae	NC_001837.1 Hepatitis GB virus A	+
M350_0.6	9	0	1000	0.018	0.133018	1	1	GCF_000847425.1	IV	ZFP36	Flaviviridae	NC_001837.1 Hepatitis GB virus A	-
M351_0.6	10	0	1000	0.253	0.493188	1	1	GCF_000847425.1	IV	SRSF1	Flaviviridae	NC_001837.1 Hepatitis GB virus A	+
M351_0.6	10	0	1000	0.356	0.594658	1	1	GCF_000847425.1	IV	SRSF1	Flaviviridae	NC_001837.1 Hepatitis GB virus A	-
M353_0.6	9	0	1000	0.265	0.52254	1	1	GCF_000847425.1	IV	SRSF7	Flaviviridae	NC_001837.1 Hepatitis GB virus A	+
M353_0.6	9	0	1000	0.361	0.594165	1	1	GCF_000847425.1	IV	SRSF7	Flaviviridae	NC_001837.1 Hepatitis GB virus A	-
s0	9	0	1000	0.041	0.198389	1	1	GCF_000847425.1	IV	ELAVL2	Flaviviridae	NC_001837.1 Hepatitis GB virus A	+
s0	9	0	1000	0.014	0.117549	1	1	GCF_000847425.1	IV	ELAVL2	Flaviviridae	NC_001837.1 Hepatitis GB virus A	-
s17	10	0	1000	0.24	0.498647	1	1	GCF_000847425.1	IV	FMR1	Flaviviridae	NC_001837.1 Hepatitis GB virus A	+
s17	10	0	1000	0.087	0.295835	1	1	GCF_000847425.1	IV	FMR1	Flaviviridae	NC_001837.1 Hepatitis GB virus A	-
s22	10	0	1000	0.268	0.500426	1	1	GCF_000847425.1	IV	SRSF1	Flaviviridae	NC_001837.1 Hepatitis GB virus A	+
s22	10	0	1000	0.39	0.640555	1	1	GCF_000847425.1	IV	SRSF1	Flaviviridae	NC_001837.1 Hepatitis GB virus A	-
s43	9	0	1000	0.651	0.8366	1	1	GCF_000847425.1	IV	HNRNPDL	Flaviviridae	NC_001837.1 Hepatitis GB virus A	+
s43	9	0	1000	0.861	0.900272	1	1	GCF_000847425.1	IV	HNRNPDL	Flaviviridae	NC_001837.1 Hepatitis GB virus A	-
s47	9	0	1000	0.476	0.702793	1	1	GCF_000847425.1	IV	SRSF2	Flaviviridae	NC_001837.1 Hepatitis GB virus A	+
s47	9	0	1000	0.447	0.644676	1	1	GCF_000847425.1	IV	SRSF2	Flaviviridae	NC_001837.1 Hepatitis GB virus A	-
s56	11	0	1000	0.112	0.324902	1	1	GCF_000847425.1	IV	SRSF2	Flaviviridae	NC_001837.1 Hepatitis GB virus A	+
s56	11	0	1000	0.121	0.344206	1	1	GCF_000847425.1	IV	SRSF2	Flaviviridae	NC_001837.1 Hepatitis GB virus A	-
s65	9	0	1000	0.024	0.153126	1	1	GCF_000847425.1	IV	TIAL1	Flaviviridae	NC_001837.1 Hepatitis GB virus A	+
s65	9	0	1000	0.017	0.129336	1	1	GCF_000847425.1	IV	TIAL1	Flaviviridae	NC_001837.1 Hepatitis GB virus A	-
encode_RBM45_2	5	21	1000	23.429	4.77281	0.755568	1	GCF_000847585.1	IV	RBM45	Togaviridae	NC_001786.1 Barmah Forest virus	+
encode_RBM45_2	5	16	1000	16.001	3.8023	1	1	GCF_000847585.1	IV	RBM45	Togaviridae	NC_001786.1 Barmah Forest virus	-
s27	6	39	1000	26.24	5.09376	0.0183347	0.221238	GCF_000847585.1	IV	NOVA1	Togaviridae	NC_001786.1 Barmah Forest virus	+
s27	6	17	1000	15.54	3.89276	0.701856	1	GCF_000847585.1	IV	NOVA1	Togaviridae	NC_001786.1 Barmah Forest virus	-
s28	6	39	1000	26.24	5.09376	0.0183347	0.221238	GCF_000847585.1	IV	NOVA2	Togaviridae	NC_001786.1 Barmah Forest virus	+
s28	6	17	1000	15.54	3.89276	0.701856	1	GCF_000847585.1	IV	NOVA2	Togaviridae	NC_001786.1 Barmah Forest virus	-
M145_0.6	7	6	1000	3.815	1.95668	0.292708	0.790748	GCF_000847585.1	IV	RBM5	Togaviridae	NC_001786.1 Barmah Forest virus	+
M145_0.6	7	2	1000	1.605	1.23227	0.677563	1	GCF_000847585.1	IV	RBM5	Togaviridae	NC_001786.1 Barmah Forest virus	-
encode_ESRP1_1	6	7	1000	10.9	3.30044	0.28832	0.790748	GCF_000847585.1	IV	ESRP1	Togaviridae	NC_001786.1 Barmah Forest virus	+
encode_ESRP1_1	6	25	1000	19.986	4.43277	0.261004	0.750637	GCF_000847585.1	IV	ESRP1	Togaviridae	NC_001786.1 Barmah Forest virus	-
encode_MBNL1_1	5	31	1000	27.656	5.18503	0.50423	0.960691	GCF_000847585.1	IV	MBNL1	Togaviridae	NC_001786.1 Barmah Forest virus	+
encode_MBNL1_1	5	42	1000	49.253	6.4354	0.352445	0.810646	GCF_000847585.1	IV	MBNL1	Togaviridae	NC_001786.1 Barmah Forest virus	-
M053_0.6	7	7	1000	3.95	2.00537	0.124735	0.589395	GCF_000847585.1	IV	RBM5	Togaviridae	NC_001786.1 Barmah Forest virus	+
M053_0.6	7	3	1000	1.47	1.18343	0.183653	0.684564	GCF_000847585.1	IV	RBM5	Togaviridae	NC_001786.1 Barmah Forest virus	-
encode_NOVA1_1	5	35	1000	43.043	6.03071	0.251277	0.772296	GCF_000847585.1	IV	NOVA1	Togaviridae	NC_001786.1 Barmah Forest virus	+
encode_NOVA1_1	5	64	1000	56.293	6.87593	0.285302	0.750637	GCF_000847585.1	IV	NOVA1	Togaviridae	NC_001786.1 Barmah Forest virus	-
325	7	46	1000	33.101	5.41222	0.0292166	0.285849	GCF_000847585.1	IV	SRSF1	Togaviridae	NC_001786.1 Barmah Forest virus	+
325	7	48	1000	33.267	5.61313	0.0146587	0.379032	GCF_000847585.1	IV	SRSF1	Togaviridae	NC_001786.1 Barmah Forest virus	-
75	6	161	1000	152.985	17.5056	0.514725	0.971534	GCF_000847585.1	IV	PPIE	Togaviridae	NC_001786.1 Barmah Forest virus	+
75	6	161	1000	152.985	17.5056	0.514725	0.922428	GCF_000847585.1	IV	PPIE	Togaviridae	NC_001786.1 Barmah Forest virus	-
M048_0.6	7	5	1000	5.389	2.35355	1	1	GCF_000847585.1	IV	RBM3	Togaviridae	NC_001786.1 Barmah Forest virus	+
M048_0.6	7	3	1000	2.312	1.49362	0.506189	0.916202	GCF_000847585.1	IV	RBM3	Togaviridae	NC_001786.1 Barmah Forest virus	-
M065_0.6	7	8	1000	9.108	2.96532	0.868277	1	GCF_000847585.1	IV	SRSF9	Togaviridae	NC_001786.1 Barmah Forest virus	+
M065_0.6	7	8	1000	6.501	2.47833	0.550849	0.952047	GCF_000847585.1	IV	SRSF9	Togaviridae	NC_001786.1 Barmah Forest virus	-
M083_0.6	7	4	1000	3.231	1.8229	0.571542	0.98056	GCF_000847585.1	IV	ZC3H10	Togaviridae	NC_001786.1 Barmah Forest virus	+
M083_0.6	7	0	1000	1.852	1.34533	0.27409	0.750637	GCF_000847585.1	IV	ZC3H10	Togaviridae	NC_001786.1 Barmah Forest virus	-
M151_0.6	7	1	1000	1.759	1.25877	1	1	GCF_000847585.1	IV	HNRNPH2	Togaviridae	NC_001786.1 Barmah Forest virus	+
M151_0.6	7	1	1000	1.588	1.22301	1	1	GCF_000847585.1	IV	HNRNPH2	Togaviridae	NC_001786.1 Barmah Forest virus	-
M175_0.6	7	7	1000	9	3.04192	0.61777	1	GCF_000847585.1	IV	RBM24	Togaviridae	NC_001786.1 Barmah Forest virus	+
M175_0.6	7	16	1000	10.729	3.33477	0.122753	0.592488	GCF_000847585.1	IV	RBM24	Togaviridae	NC_001786.1 Barmah Forest virus	-
encode_FUS_1	5	12	1000	16.036	4.21764	0.380697	0.870129	GCF_000847585.1	IV	FUS	Togaviridae	NC_001786.1 Barmah Forest virus	+
encode_FUS_1	5	29	1000	29.165	5.52959	1	1	GCF_000847585.1	IV	FUS	Togaviridae	NC_001786.1 Barmah Forest virus	-
encode_HNRNPK_1	5	14	1000	15.491	3.7895	0.799834	1	GCF_000847585.1	IV	HNRNPK	Togaviridae	NC_001786.1 Barmah Forest virus	+
encode_HNRNPK_1	5	12	1000	8.777	2.83572	0.305651	0.757318	GCF_000847585.1	IV	HNRNPK	Togaviridae	NC_001786.1 Barmah Forest virus	-
encode_NOVA1_2	5	14	1000	14.347	3.60022	1	1	GCF_000847585.1	IV	NOVA1	Togaviridae	NC_001786.1 Barmah Forest virus	+
encode_NOVA1_2	5	11	1000	12.532	3.42238	0.777821	1	GCF_000847585.1	IV	NOVA1	Togaviridae	NC_001786.1 Barmah Forest virus	-
encode_SNRPA_1	6	33	1000	29.556	5.20672	0.518031	0.971534	GCF_000847585.1	IV	SNRPA	Togaviridae	NC_001786.1 Barmah Forest virus	+
encode_SNRPA_1	6	29	1000	22.687	4.35936	0.172237	0.670427	GCF_000847585.1	IV	SNRPA	Togaviridae	NC_001786.1 Barmah Forest virus	-
encode_SRSF5_2	5	14	1000	18.757	4.12904	0.35299	0.852888	GCF_000847585.1	IV	SRSF5	Togaviridae	NC_001786.1 Barmah Forest virus	+
encode_SRSF5_2	5	12	1000	13.445	3.40243	0.890815	1	GCF_000847585.1	IV	SRSF5	Togaviridae	NC_001786.1 Barmah Forest virus	-
s21	6	9	1000	10.377	3.20236	0.875701	1	GCF_000847585.1	IV	ZRANB2	Togaviridae	NC_001786.1 Barmah Forest virus	+
s21	6	10	1000	10.139	3.03857	1	1	GCF_000847585.1	IV	ZRANB2	Togaviridae	NC_001786.1 Barmah Forest virus	-
M141_0.6	7	4	1000	3.599	1.85678	0.787471	1	GCF_000847585.1	IV	ESRP2	Togaviridae	NC_001786.1 Barmah Forest virus	+
M141_0.6	7	3	1000	5.67	2.26102	0.395028	0.836726	GCF_000847585.1	IV	ESRP2	Togaviridae	NC_001786.1 Barmah Forest virus	-
1170	4	71	1000	66.457	6.28057	0.579358	0.989062	GCF_000847585.1	IV	ELAVL1	Togaviridae	NC_001786.1 Barmah Forest virus	+
1170	4	133	1000	121.13	8.22306	0.272868	0.750637	GCF_000847585.1	IV	ELAVL1	Togaviridae	NC_001786.1 Barmah Forest virus	-
41	7	2	1000	2.663	1.6686	1	1	GCF_000847585.1	IV	KHSRP	Togaviridae	NC_001786.1 Barmah Forest virus	+
41	7	4	1000	6.055	2.59937	0.541283	0.94204	GCF_000847585.1	IV	KHSRP	Togaviridae	NC_001786.1 Barmah Forest virus	-
64	4	336	1000	329.274	12.1758	0.695473	1	GCF_000847585.1	IV	NOVA1	Togaviridae	NC_001786.1 Barmah Forest virus	+
64	4	286	1000	308.651	12.109	0.204151	0.724021	GCF_000847585.1	IV	NOVA1	Togaviridae	NC_001786.1 Barmah Forest virus	-
99	4	84	1000	91.951	8.2039	0.432327	0.915218	GCF_000847585.1	IV	NOVA1	Togaviridae	NC_001786.1 Barmah Forest virus	+
99	4	107	1000	125.993	9.43345	0.09715	0.54681	GCF_000847585.1	IV	NOVA1	Togaviridae	NC_001786.1 Barmah Forest virus	-
M054_0.6	7	2	1000	1.517	1.38117	0.667207	1	GCF_000847585.1	IV	RBM8A	Togaviridae	NC_001786.1 Barmah Forest virus	+
M054_0.6	7	4	1000	1.568	1.38249	0.0744519	0.499104	GCF_000847585.1	IV	RBM8A	Togaviridae	NC_001786.1 Barmah Forest virus	-
M075_0.6	7	6	1000	1.857	1.64841	0.0119308	0.172758	GCF_000847585.1	IV	TIA1	Togaviridae	NC_001786.1 Barmah Forest virus	+
M075_0.6	7	13	1000	6.605	3.14529	0.0282353	0.391697	GCF_000847585.1	IV	TIA1	Togaviridae	NC_001786.1 Barmah Forest virus	-
M320_0.6a	4	70	1000	62.016	7.04112	0.307774	0.80154	GCF_000847585.1	IV	MBNL1	Togaviridae	NC_001786.1 Barmah Forest virus	+
M320_0.6a	4	98	1000	112.48	8.81086	0.18434	0.684564	GCF_000847585.1	IV	MBNL1	Togaviridae	NC_001786.1 Barmah Forest virus	-
encode_FUBP3_1	5	25	1000	16.405	4.08873	0.0461919	0.367922	GCF_000847585.1	IV	FUBP3	Togaviridae	NC_001786.1 Barmah Forest virus	+
encode_FUBP3_1	5	21	1000	25.833	5.10462	0.429164	0.848301	GCF_000847585.1	IV	FUBP3	Togaviridae	NC_001786.1 Barmah Forest virus	-
encode_KHSRP_1	5	33	1000	24.948	5.17978	0.108169	0.559387	GCF_000847585.1	IV	KHSRP	Togaviridae	NC_001786.1 Barmah Forest virus	+
encode_KHSRP_1	5	54	1000	49.021	6.71816	0.473448	0.877976	GCF_000847585.1	IV	KHSRP	Togaviridae	NC_001786.1 Barmah Forest virus	-
encode_SF1_1	5	36	1000	53.53	6.77148	0.013552	0.175208	GCF_000847585.1	IV	SF1	Togaviridae	NC_001786.1 Barmah Forest virus	+
encode_SF1_1	5	38	1000	46.474	6.4847	0.239051	0.731135	GCF_000847585.1	IV	SF1	Togaviridae	NC_001786.1 Barmah Forest virus	-
encode_SRSF9_1	5	63	1000	56.483	6.75688	0.385209	0.870251	GCF_000847585.1	IV	SRSF9	Togaviridae	NC_001786.1 Barmah Forest virus	+
encode_SRSF9_1	5	39	1000	34.644	5.45775	0.443053	0.857675	GCF_000847585.1	IV	SRSF9	Togaviridae	NC_001786.1 Barmah Forest virus	-
s100	7	7	1000	4.923	2.51782	0.357847	0.852888	GCF_000847585.1	IV	PTBP1	Togaviridae	NC_001786.1 Barmah Forest virus	+
s100	7	38	1000	24.119	5.69098	0.00769319	0.362112	GCF_000847585.1	IV	PTBP1	Togaviridae	NC_001786.1 Barmah Forest virus	-
s102	7	8	1000	8.99	3.56604	1	1	GCF_000847585.1	IV	RBM4	Togaviridae	NC_001786.1 Barmah Forest virus	+
s102	7	7	1000	11.771	4.14412	0.189102	0.68788	GCF_000847585.1	IV	RBM4	Togaviridae	NC_001786.1 Barmah Forest virus	-
s30	4	70	1000	62.016	7.04112	0.307774	0.80154	GCF_000847585.1	IV	MBNL1	Togaviridae	NC_001786.1 Barmah Forest virus	+
s30	4	98	1000	112.48	8.81086	0.18434	0.684564	GCF_000847585.1	IV	MBNL1	Togaviridae	NC_001786.1 Barmah Forest virus	-
encode_EIF4G2_3	5	10	1000	5.613	2.32048	0.0839193	0.48998	GCF_000847585.1	IV	EIF4G2	Togaviridae	NC_001786.1 Barmah Forest virus	+
encode_EIF4G2_3	5	9	1000	4.975	2.17327	0.107681	0.560552	GCF_000847585.1	IV	EIF4G2	Togaviridae	NC_001786.1 Barmah Forest virus	-
s31	5	21	1000	28.89	5.22391	0.161358	0.640958	GCF_000847585.1	IV	FUS	Togaviridae	NC_001786.1 Barmah Forest virus	+
s31	5	69	1000	51.549	6.70437	0.0175472	0.386078	GCF_000847585.1	IV	FUS	Togaviridae	NC_001786.1 Barmah Forest virus	-
s37	7	3	1000	1.793	1.34311	0.267501	0.774682	GCF_000847585.1	IV	SRSF2	Togaviridae	NC_001786.1 Barmah Forest virus	+
s37	7	2	1000	2.669	1.58302	1	1	GCF_000847585.1	IV	SRSF2	Togaviridae	NC_001786.1 Barmah Forest virus	-
243	7	5	1000	1.245	1.09461	0.00897505	0.14768	GCF_000847585.1	IV	SRSF1	Togaviridae	NC_001786.1 Barmah Forest virus	+
243	7	1	1000	0.935	0.994869	0.607429	1	GCF_000847585.1	IV	SRSF1	Togaviridae	NC_001786.1 Barmah Forest virus	-
M002_0.6	7	5	1000	4.115	1.87918	0.615302	1	GCF_000847585.1	IV	ANKHD1	Togaviridae	NC_001786.1 Barmah Forest virus	+
M002_0.6	7	1	1000	1.894	1.33886	1	1	GCF_000847585.1	IV	ANKHD1	Togaviridae	NC_001786.1 Barmah Forest virus	-
M273_0.6	7	5	1000	1.245	1.09461	0.00897505	0.14768	GCF_000847585.1	IV	SRSF1	Togaviridae	NC_001786.1 Barmah Forest virus	+
M273_0.6	7	1	1000	0.935	0.994869	0.607429	1	GCF_000847585.1	IV	SRSF1	Togaviridae	NC_001786.1 Barmah Forest virus	-
131	5	73	1000	83.871	8.50816	0.249744	0.772296	GCF_000847585.1	IV	HNRNPH1	Togaviridae	NC_001786.1 Barmah Forest virus	+
131	5	95	1000	118.061	9.99125	0.0331682	0.391697	GCF_000847585.1	IV	HNRNPH1	Togaviridae	NC_001786.1 Barmah Forest virus	-
142	5	73	1000	83.871	8.50816	0.249744	0.772296	GCF_000847585.1	IV	HNRNPH2	Togaviridae	NC_001786.1 Barmah Forest virus	+
142	5	95	1000	118.061	9.99125	0.0331682	0.391697	GCF_000847585.1	IV	HNRNPH2	Togaviridae	NC_001786.1 Barmah Forest virus	-
171	5	73	1000	83.871	8.50816	0.249744	0.772296	GCF_000847585.1	IV	HNRNPF	Togaviridae	NC_001786.1 Barmah Forest virus	+
171	5	95	1000	118.061	9.99125	0.0331682	0.391697	GCF_000847585.1	IV	HNRNPF	Togaviridae	NC_001786.1 Barmah Forest virus	-
182	5	73	1000	83.871	8.50816	0.249744	0.772296	GCF_000847585.1	IV	HNRNPH3	Togaviridae	NC_001786.1 Barmah Forest virus	+
182	5	95	1000	118.061	9.99125	0.0331682	0.391697	GCF_000847585.1	IV	HNRNPH3	Togaviridae	NC_001786.1 Barmah Forest virus	-
46	5	73	1000	83.871	8.50816	0.249744	0.772296	GCF_000847585.1	IV	GRSF1	Togaviridae	NC_001786.1 Barmah Forest virus	+
46	5	95	1000	118.061	9.99125	0.0331682	0.391697	GCF_000847585.1	IV	GRSF1	Togaviridae	NC_001786.1 Barmah Forest virus	-
M047_0.6	7	4	1000	4.756	2.07672	1	1	GCF_000847585.1	IV	RBM28	Togaviridae	NC_001786.1 Barmah Forest virus	+
M047_0.6	7	5	1000	3.804	1.88657	0.439928	0.856205	GCF_000847585.1	IV	RBM28	Togaviridae	NC_001786.1 Barmah Forest virus	-
M163_0.6	7	25	1000	17.863	4.47239	0.0960977	0.521352	GCF_000847585.1	IV	IGF2BP3	Togaviridae	NC_001786.1 Barmah Forest virus	+
M163_0.6	7	10	1000	8.027	2.80395	0.475368	0.877976	GCF_000847585.1	IV	IGF2BP3	Togaviridae	NC_001786.1 Barmah Forest virus	-
encode_CELF1_1	6	31	1000	21.637	4.44286	0.0516759	0.38023	GCF_000847585.1	IV	CELF1	Togaviridae	NC_001786.1 Barmah Forest virus	+
encode_CELF1_1	6	39	1000	46.395	6.72281	0.303059	0.757318	GCF_000847585.1	IV	CELF1	Togaviridae	NC_001786.1 Barmah Forest virus	-
encode_DAZ3_2	6	15	1000	9.791	3.1095	0.106352	0.557965	GCF_000847585.1	IV	DAZ3	Togaviridae	NC_001786.1 Barmah Forest virus	+
encode_DAZ3_2	6	40	1000	28.376	5.452	0.0377208	0.413786	GCF_000847585.1	IV	DAZ3	Togaviridae	NC_001786.1 Barmah Forest virus	-
encode_SFPQ_1	6	10	1000	19.05	4.17791	0.0378254	0.333971	GCF_000847585.1	IV	SFPQ	Togaviridae	NC_001786.1 Barmah Forest virus	+
encode_SFPQ_1	6	25	1000	16.176	3.859	0.0338321	0.391697	GCF_000847585.1	IV	SFPQ	Togaviridae	NC_001786.1 Barmah Forest virus	-
encode_TRA2A_1	7	35	1000	17.853	4.02238	0.000304762	0.027581	GCF_000847585.1	IV	TRA2A	Togaviridae	NC_001786.1 Barmah Forest virus	+
encode_TRA2A_1	7	6	1000	5.48	2.28491	0.828257	1	GCF_000847585.1	IV	TRA2A	Togaviridae	NC_001786.1 Barmah Forest virus	-
s54	4	146	1000	112.446	9.20945	0.00237867	0.0538173	GCF_000847585.1	IV	YBX1	Togaviridae	NC_001786.1 Barmah Forest virus	+
s54	4	92	1000	96.732	8.46829	0.68279	1	GCF_000847585.1	IV	YBX1	Togaviridae	NC_001786.1 Barmah Forest virus	-
s6	5	63	1000	73.847	6.87844	0.220131	0.75177	GCF_000847585.1	IV	TIAL1	Togaviridae	NC_001786.1 Barmah Forest virus	+
s6	5	136	1000	136.87	9.56695	1	1	GCF_000847585.1	IV	TIAL1	Togaviridae	NC_001786.1 Barmah Forest virus	-
s86	7	2	1000	1.484	1.26939	0.663523	1	GCF_000847585.1	IV	CELF1	Togaviridae	NC_001786.1 Barmah Forest virus	+
s86	7	2	1000	4.316	2.09345	0.461281	0.876705	GCF_000847585.1	IV	CELF1	Togaviridae	NC_001786.1 Barmah Forest virus	-
s9	5	63	1000	73.847	6.87844	0.220131	0.75177	GCF_000847585.1	IV	TIA1	Togaviridae	NC_001786.1 Barmah Forest virus	+
s9	5	136	1000	136.87	9.56695	1	1	GCF_000847585.1	IV	TIA1	Togaviridae	NC_001786.1 Barmah Forest virus	-
s97	5	29	1000	30.914	5.11182	0.856711	1	GCF_000847585.1	IV	SRSF9	Togaviridae	NC_001786.1 Barmah Forest virus	+
s97	5	14	1000	14.451	3.71341	1	1	GCF_000847585.1	IV	SRSF9	Togaviridae	NC_001786.1 Barmah Forest virus	-
1174	4	86	1000	128.978	9.23628	6.55598e-05	0.00791088	GCF_000847585.1	IV	KHDRBS3	Togaviridae	NC_001786.1 Barmah Forest virus	+
1174	4	95	1000	106.952	8.2075	0.263719	0.750637	GCF_000847585.1	IV	KHDRBS3	Togaviridae	NC_001786.1 Barmah Forest virus	-
167	7	62	1000	65.316	7.71594	0.756143	1	GCF_000847585.1	IV	SRSF1	Togaviridae	NC_001786.1 Barmah Forest virus	+
167	7	58	1000	50.287	6.78444	0.288228	0.750637	GCF_000847585.1	IV	SRSF1	Togaviridae	NC_001786.1 Barmah Forest virus	-
49	6	6	1000	5.418	2.31444	0.668092	1	GCF_000847585.1	IV	ZFP36	Togaviridae	NC_001786.1 Barmah Forest virus	+
49	6	10	1000	11.717	3.25815	0.769173	1	GCF_000847585.1	IV	ZFP36	Togaviridae	NC_001786.1 Barmah Forest virus	-
953	9	4	1000	1.687	1.24843	0.0912402	0.508963	GCF_000847585.1	IV	SRSF2	Togaviridae	NC_001786.1 Barmah Forest virus	+
953	9	1	1000	0.558	0.72468	0.427655	0.848301	GCF_000847585.1	IV	SRSF2	Togaviridae	NC_001786.1 Barmah Forest virus	-
M032_0.6	7	28	1000	17.936	4.59511	0.0238491	0.269792	GCF_000847585.1	IV	IGF2BP2	Togaviridae	NC_001786.1 Barmah Forest virus	+
M032_0.6	7	10	1000	7.011	2.74124	0.25169	0.746817	GCF_000847585.1	IV	IGF2BP2	Togaviridae	NC_001786.1 Barmah Forest virus	-
M155_0.6	7	2	1000	2.515	1.6051	1	1	GCF_000847585.1	IV	ZNF638	Togaviridae	NC_001786.1 Barmah Forest virus	+
M155_0.6	7	13	1000	8.52	2.75085	0.121705	0.592488	GCF_000847585.1	IV	ZNF638	Togaviridae	NC_001786.1 Barmah Forest virus	-
M162_0.6	7	11	1000	7.29	2.6128	0.188093	0.694794	GCF_000847585.1	IV	PABPC5	Togaviridae	NC_001786.1 Barmah Forest virus	+
M162_0.6	7	4	1000	2.38	1.54661	0.309622	0.757318	GCF_000847585.1	IV	PABPC5	Togaviridae	NC_001786.1 Barmah Forest virus	-
M332_0.6	10	0	1000	0.177	0.412118	1	1	GCF_000847585.1	IV	SRSF2	Togaviridae	NC_001786.1 Barmah Forest virus	+
M332_0.6	10	0	1000	0.243	0.492131	1	1	GCF_000847585.1	IV	SRSF2	Togaviridae	NC_001786.1 Barmah Forest virus	-
M352_0.6	9	4	1000	1.688	1.24828	0.0913883	0.508963	GCF_000847585.1	IV	SRSF2	Togaviridae	NC_001786.1 Barmah Forest virus	+
M352_0.6	9	1	1000	0.558	0.72468	0.427655	0.848301	GCF_000847585.1	IV	SRSF2	Togaviridae	NC_001786.1 Barmah Forest virus	-
encode_CPEB1_1	5	25	1000	12.686	4.13673	0.0017307	0.0522095	GCF_000847585.1	IV	CPEB1	Togaviridae	NC_001786.1 Barmah Forest virus	+
encode_CPEB1_1	5	40	1000	32.715	6.53088	0.218892	0.725165	GCF_000847585.1	IV	CPEB1	Togaviridae	NC_001786.1 Barmah Forest virus	-
encode_DAZ3_1	5	35	1000	39.874	5.74414	0.52482	0.972926	GCF_000847585.1	IV	DAZ3	Togaviridae	NC_001786.1 Barmah Forest virus	+
encode_DAZ3_1	5	59	1000	61.497	7.17938	0.798284	1	GCF_000847585.1	IV	DAZ3	Togaviridae	NC_001786.1 Barmah Forest virus	-
encode_FUBP1_1	5	31	1000	20.791	4.7267	0.035703	0.331397	GCF_000847585.1	IV	FUBP1	Togaviridae	NC_001786.1 Barmah Forest virus	+
encode_FUBP1_1	5	70	1000	56.737	7.53489	0.0830775	0.50973	GCF_000847585.1	IV	FUBP1	Togaviridae	NC_001786.1 Barmah Forest virus	-
encode_HNRNPCL1_1	5	25	1000	12.686	4.13673	0.0017307	0.0522095	GCF_000847585.1	IV	HNRNPCL1	Togaviridae	NC_001786.1 Barmah Forest virus	+
encode_HNRNPCL1_1	5	40	1000	32.715	6.53088	0.218892	0.725165	GCF_000847585.1	IV	HNRNPCL1	Togaviridae	NC_001786.1 Barmah Forest virus	-
encode_HNRNPDL_1	5	20	1000	27.87	5.09638	0.153893	0.623231	GCF_000847585.1	IV	HNRNPDL	Togaviridae	NC_001786.1 Barmah Forest virus	+
encode_HNRNPDL_1	5	35	1000	27.405	4.89887	0.150251	0.632452	GCF_000847585.1	IV	HNRNPDL	Togaviridae	NC_001786.1 Barmah Forest virus	-
encode_HNRNPF_2	5	36	1000	43.381	5.91649	0.2869	0.790748	GCF_000847585.1	IV	HNRNPF	Togaviridae	NC_001786.1 Barmah Forest virus	+
encode_HNRNPF_2	5	46	1000	53.919	6.34497	0.305802	0.757318	GCF_000847585.1	IV	HNRNPF	Togaviridae	NC_001786.1 Barmah Forest virus	-
encode_PABPN1L_1	5	72	1000	53.485	8.1149	0.0135498	0.175208	GCF_000847585.1	IV	PABPN1L	Togaviridae	NC_001786.1 Barmah Forest virus	+
encode_PABPN1L_1	5	41	1000	19.67	4.91358	2.14879e-05	0.00388932	GCF_000847585.1	IV	PABPN1L	Togaviridae	NC_001786.1 Barmah Forest virus	-
encode_PCBP1_1	5	21	1000	26.364	4.38437	0.329948	0.828947	GCF_000847585.1	IV	PCBP1	Togaviridae	NC_001786.1 Barmah Forest virus	+
encode_PCBP1_1	5	6	1000	14.079	3.32352	0.031146	0.391697	GCF_000847585.1	IV	PCBP1	Togaviridae	NC_001786.1 Barmah Forest virus	-
encode_RBM15B_2	5	6	1000	8.554	2.78079	0.492935	0.960691	GCF_000847585.1	IV	RBM15B	Togaviridae	NC_001786.1 Barmah Forest virus	+
encode_RBM15B_2	5	12	1000	10.707	3.18485	0.644707	1	GCF_000847585.1	IV	RBM15B	Togaviridae	NC_001786.1 Barmah Forest virus	-
encode_RBM24_1	5	13	1000	13.45	3.55502	1	1	GCF_000847585.1	IV	RBM24	Togaviridae	NC_001786.1 Barmah Forest virus	+
encode_RBM24_1	5	24	1000	22.036	4.82514	0.668594	1	GCF_000847585.1	IV	RBM24	Togaviridae	NC_001786.1 Barmah Forest virus	-
encode_TIA1_1	5	25	1000	12.686	4.13673	0.0017307	0.0522095	GCF_000847585.1	IV	TIA1	Togaviridae	NC_001786.1 Barmah Forest virus	+
encode_TIA1_1	5	40	1000	32.715	6.53088	0.218892	0.725165	GCF_000847585.1	IV	TIA1	Togaviridae	NC_001786.1 Barmah Forest virus	-
encode_ZNF326_2	5	9	1000	9.429	2.9836	1	1	GCF_000847585.1	IV	ZNF326	Togaviridae	NC_001786.1 Barmah Forest virus	+
encode_ZNF326_2	5	9	1000	11.148	3.37928	0.652114	1	GCF_000847585.1	IV	ZNF326	Togaviridae	NC_001786.1 Barmah Forest virus	-
s1	5	39	1000	45.344	6.04236	0.412197	0.888186	GCF_000847585.1	IV	ELAVL2	Togaviridae	NC_001786.1 Barmah Forest virus	+
s1	5	76	1000	81.898	7.94775	0.578858	0.97919	GCF_000847585.1	IV	ELAVL2	Togaviridae	NC_001786.1 Barmah Forest virus	-
s3	7	7	1000	2.863	1.66343	0.0270508	0.285849	GCF_000847585.1	IV	ELAVL2	Togaviridae	NC_001786.1 Barmah Forest virus	+
s3	7	6	1000	7.653	2.65134	0.716613	1	GCF_000847585.1	IV	ELAVL2	Togaviridae	NC_001786.1 Barmah Forest virus	-
s35	6	99	1000	93.159	9.17245	0.53225	0.972926	GCF_000847585.1	IV	HNRNPDL	Togaviridae	NC_001786.1 Barmah Forest virus	+
s35	6	122	1000	108.728	9.62209	0.209893	0.725165	GCF_000847585.1	IV	HNRNPDL	Togaviridae	NC_001786.1 Barmah Forest virus	-
s46	9	4	1000	1.739	1.28706	0.0990949	0.527535	GCF_000847585.1	IV	SRSF2	Togaviridae	NC_001786.1 Barmah Forest virus	+
s46	9	0	1000	0.547	0.712951	1	1	GCF_000847585.1	IV	SRSF2	Togaviridae	NC_001786.1 Barmah Forest virus	-
M077_0.6	7	7	1000	1.55	1.54204	0.00111497	0.0504525	GCF_000847585.1	IV	U2AF2	Togaviridae	NC_001786.1 Barmah Forest virus	+
M077_0.6	7	9	1000	6.347	3.13056	0.313278	0.761119	GCF_000847585.1	IV	U2AF2	Togaviridae	NC_001786.1 Barmah Forest virus	-
encode_ZNF326_1	5	30	1000	29.695	5.16514	0.926643	1	GCF_000847585.1	IV	ZNF326	Togaviridae	NC_001786.1 Barmah Forest virus	+
encode_ZNF326_1	5	38	1000	30.136	5.06509	0.144628	0.632452	GCF_000847585.1	IV	ZNF326	Togaviridae	NC_001786.1 Barmah Forest virus	-
M333_0.6	5	51	1000	49.749	6.66922	0.831064	1	GCF_000847585.1	IV	SRSF9	Togaviridae	NC_001786.1 Barmah Forest virus	+
M333_0.6	5	27	1000	24.033	4.70872	0.538732	0.94204	GCF_000847585.1	IV	SRSF9	Togaviridae	NC_001786.1 Barmah Forest virus	-
encode_HNRNPA0_2	4	27	1000	36.035	5.53248	0.154947	0.623231	GCF_000847585.1	IV	HNRNPA0	Togaviridae	NC_001786.1 Barmah Forest virus	+
encode_HNRNPA0_2	4	28	1000	40.548	5.86942	0.0487339	0.433017	GCF_000847585.1	IV	HNRNPA0	Togaviridae	NC_001786.1 Barmah Forest virus	-
encode_RBM47_2	5	7	1000	10.781	3.24801	0.356535	0.852888	GCF_000847585.1	IV	RBM47	Togaviridae	NC_001786.1 Barmah Forest virus	+
encode_RBM47_2	5	14	1000	15.706	3.69719	0.800122	1	GCF_000847585.1	IV	RBM47	Togaviridae	NC_001786.1 Barmah Forest virus	-
M033_0.6	7	4	1000	5.311	2.22559	0.826118	1	GCF_000847585.1	IV	KHDRBS3	Togaviridae	NC_001786.1 Barmah Forest virus	+
M033_0.6	7	2	1000	2.271	1.53098	1	1	GCF_000847585.1	IV	KHDRBS3	Togaviridae	NC_001786.1 Barmah Forest virus	-
M156_0.6	7	5	1000	1.602	1.46278	0.0237835	0.269792	GCF_000847585.1	IV	TIA1	Togaviridae	NC_001786.1 Barmah Forest virus	+
M156_0.6	7	10	1000	6.724	3.01113	0.239863	0.731135	GCF_000847585.1	IV	TIA1	Togaviridae	NC_001786.1 Barmah Forest virus	-
M168_0.6	7	5	1000	4.951	2.31775	0.822815	1	GCF_000847585.1	IV	SFPQ	Togaviridae	NC_001786.1 Barmah Forest virus	+
M168_0.6	7	12	1000	9.431	3.09044	0.410803	0.83791	GCF_000847585.1	IV	SFPQ	Togaviridae	NC_001786.1 Barmah Forest virus	-
M177_0.6	7	12	1000	7.818	2.68889	0.147007	0.623231	GCF_000847585.1	IV	PCBP1	Togaviridae	NC_001786.1 Barmah Forest virus	+
M177_0.6	7	7	1000	6.489	2.52988	0.842346	1	GCF_000847585.1	IV	PCBP1	Togaviridae	NC_001786.1 Barmah Forest virus	-
encode_A1CF_1	6	16	1000	13.919	3.63203	0.503538	0.960691	GCF_000847585.1	IV	A1CF	Togaviridae	NC_001786.1 Barmah Forest virus	+
encode_A1CF_1	6	9	1000	10.707	3.20553	0.75883	1	GCF_000847585.1	IV	A1CF	Togaviridae	NC_001786.1 Barmah Forest virus	-
encode_FUBP1_2	7	5	1000	4.217	2.04159	0.621431	1	GCF_000847585.1	IV	FUBP1	Togaviridae	NC_001786.1 Barmah Forest virus	+
encode_FUBP1_2	7	5	1000	7.419	2.72596	0.464669	0.876705	GCF_000847585.1	IV	FUBP1	Togaviridae	NC_001786.1 Barmah Forest virus	-
encode_NUPL2_1	7	9	1000	8.687	3.07156	0.864211	1	GCF_000847585.1	IV	NUPL2	Togaviridae	NC_001786.1 Barmah Forest virus	+
encode_NUPL2_1	7	4	1000	2.37	1.51042	0.308475	0.757318	GCF_000847585.1	IV	NUPL2	Togaviridae	NC_001786.1 Barmah Forest virus	-
encode_PUM1_1	5	45	1000	39.773	6.01878	0.382184	0.870129	GCF_000847585.1	IV	PUM1	Togaviridae	NC_001786.1 Barmah Forest virus	+
encode_PUM1_1	5	57	1000	52.665	7.17386	0.533795	0.94204	GCF_000847585.1	IV	PUM1	Togaviridae	NC_001786.1 Barmah Forest virus	-
encode_RBFOX2_1	5	7	1000	14.417	3.74314	0.0473471	0.367922	GCF_000847585.1	IV	RBFOX2	Togaviridae	NC_001786.1 Barmah Forest virus	+
encode_RBFOX2_1	5	14	1000	14.807	3.74964	1	1	GCF_000847585.1	IV	RBFOX2	Togaviridae	NC_001786.1 Barmah Forest virus	-
encode_RBFOX3_1	5	7	1000	14.417	3.74314	0.0473471	0.367922	GCF_000847585.1	IV	RBFOX3	Togaviridae	NC_001786.1 Barmah Forest virus	+
encode_RBFOX3_1	5	14	1000	14.807	3.74964	1	1	GCF_000847585.1	IV	RBFOX3	Togaviridae	NC_001786.1 Barmah Forest virus	-
encode_RBM41_1	5	18	1000	19.085	4.39444	0.908819	1	GCF_000847585.1	IV	RBM41	Togaviridae	NC_001786.1 Barmah Forest virus	+
encode_RBM41_1	5	38	1000	27.215	5.02713	0.043411	0.424724	GCF_000847585.1	IV	RBM41	Togaviridae	NC_001786.1 Barmah Forest virus	-
encode_RBM4B_2	6	11	1000	16.03	3.8275	0.258699	0.772296	GCF_000847585.1	IV	RBM4B	Togaviridae	NC_001786.1 Barmah Forest virus	+
encode_RBM4B_2	6	23	1000	23.018	4.46964	1	1	GCF_000847585.1	IV	RBM4B	Togaviridae	NC_001786.1 Barmah Forest virus	-
encode_SF1_2	5	8	1000	16.537	3.96666	0.0350746	0.331397	GCF_000847585.1	IV	SF1	Togaviridae	NC_001786.1 Barmah Forest virus	+
encode_SF1_2	5	23	1000	21.131	4.46114	0.662126	1	GCF_000847585.1	IV	SF1	Togaviridae	NC_001786.1 Barmah Forest virus	-
encode_TAF15_1	7	10	1000	10.531	3.59443	1	1	GCF_000847585.1	IV	TAF15	Togaviridae	NC_001786.1 Barmah Forest virus	+
encode_TAF15_1	7	11	1000	16.88	4.61659	0.17888	0.684564	GCF_000847585.1	IV	TAF15	Togaviridae	NC_001786.1 Barmah Forest virus	-
encode_TRNAU1AP_1	7	3	1000	2.876	1.70984	0.766901	1	GCF_000847585.1	IV	TRNAU1AP	Togaviridae	NC_001786.1 Barmah Forest virus	+
encode_TRNAU1AP_1	7	8	1000	8.037	2.84248	1	1	GCF_000847585.1	IV	TRNAU1AP	Togaviridae	NC_001786.1 Barmah Forest virus	-
s52	6	18	1000	21.997	4.60045	0.454962	0.941184	GCF_000847585.1	IV	SRSF2	Togaviridae	NC_001786.1 Barmah Forest virus	+
s52	6	16	1000	17.531	4.04047	0.811336	1	GCF_000847585.1	IV	SRSF2	Togaviridae	NC_001786.1 Barmah Forest virus	-
947	10	0	1000	0.072	0.258617	1	1	GCF_000847585.1	IV	SNRPA	Togaviridae	NC_001786.1 Barmah Forest virus	+
947	10	0	1000	0.132	0.361534	1	1	GCF_000847585.1	IV	SNRPA	Togaviridae	NC_001786.1 Barmah Forest virus	-
M346_0.6	10	0	1000	0.072	0.258617	1	1	GCF_000847585.1	IV	SNRPA	Togaviridae	NC_001786.1 Barmah Forest virus	+
M346_0.6	10	0	1000	0.132	0.361534	1	1	GCF_000847585.1	IV	SNRPA	Togaviridae	NC_001786.1 Barmah Forest virus	-
encode_BOLL_1	7	9	1000	4.72	2.29671	0.0602075	0.421567	GCF_000847585.1	IV	BOLL	Togaviridae	NC_001786.1 Barmah Forest virus	+
encode_BOLL_1	7	20	1000	17.179	4.27144	0.467415	0.876705	GCF_000847585.1	IV	BOLL	Togaviridae	NC_001786.1 Barmah Forest virus	-
M152_0.6	8	2	1000	3.749	1.86587	0.599437	1	GCF_000847585.1	IV	FXR1	Togaviridae	NC_001786.1 Barmah Forest virus	+
M152_0.6	8	0	1000	1.406	1.18683	0.655346	1	GCF_000847585.1	IV	FXR1	Togaviridae	NC_001786.1 Barmah Forest virus	-
encode_HNRNPK_2	5	14	1000	10.858	3.19532	0.358119	0.852888	GCF_000847585.1	IV	HNRNPK	Togaviridae	NC_001786.1 Barmah Forest virus	+
encode_HNRNPK_2	5	9	1000	8.28	2.76029	0.726779	1	GCF_000847585.1	IV	HNRNPK	Togaviridae	NC_001786.1 Barmah Forest virus	-
encode_MSI1_2	5	28	1000	27.495	4.87768	0.923714	1	GCF_000847585.1	IV	MSI1	Togaviridae	NC_001786.1 Barmah Forest virus	+
encode_MSI1_2	5	9	1000	15.781	3.8797	0.0996946	0.54681	GCF_000847585.1	IV	MSI1	Togaviridae	NC_001786.1 Barmah Forest virus	-
s42	5	80	1000	67.153	7.28963	0.125409	0.589395	GCF_000847585.1	IV	SRSF6	Togaviridae	NC_001786.1 Barmah Forest virus	+
s42	5	74	1000	66.884	7.30657	0.390003	0.836726	GCF_000847585.1	IV	SRSF6	Togaviridae	NC_001786.1 Barmah Forest virus	-
922	4	231	1000	220.651	10.2937	0.475275	0.945326	GCF_000847585.1	IV	RBMX	Togaviridae	NC_001786.1 Barmah Forest virus	+
922	4	154	1000	153.952	9.28558	0.967645	1	GCF_000847585.1	IV	RBMX	Togaviridae	NC_001786.1 Barmah Forest virus	-
encode_RBM23_1	5	17	1000	21.209	4.99963	0.445298	0.937196	GCF_000847585.1	IV	RBM23	Togaviridae	NC_001786.1 Barmah Forest virus	+
encode_RBM23_1	5	18	1000	17.313	4.23095	0.809585	1	GCF_000847585.1	IV	RBM23	Togaviridae	NC_001786.1 Barmah Forest virus	-
s26	7	103	1000	84.128	9.04773	0.0427025	0.359495	GCF_000847585.1	IV	SFPQ	Togaviridae	NC_001786.1 Barmah Forest virus	+
s26	7	41	1000	33.792	6.09294	0.226419	0.731135	GCF_000847585.1	IV	SFPQ	Togaviridae	NC_001786.1 Barmah Forest virus	-
s58	10	0	1000	0.319	0.554569	1	1	GCF_000847585.1	IV	SRSF2	Togaviridae	NC_001786.1 Barmah Forest virus	+
s58	10	0	1000	0.406	0.646206	1	1	GCF_000847585.1	IV	SRSF2	Togaviridae	NC_001786.1 Barmah Forest virus	-
encode_UNK_2	6	26	1000	22.483	4.32139	0.458227	0.942489	GCF_000847585.1	IV	UNK	Togaviridae	NC_001786.1 Barmah Forest virus	+
encode_UNK_2	6	22	1000	16.865	4.04959	0.220354	0.725165	GCF_000847585.1	IV	UNK	Togaviridae	NC_001786.1 Barmah Forest virus	-
s24	8	18	1000	11.532	3.24338	0.073786	0.450841	GCF_000847585.1	IV	SFPQ	Togaviridae	NC_001786.1 Barmah Forest virus	+
s24	8	13	1000	6.553	2.45463	0.0277197	0.391697	GCF_000847585.1	IV	SFPQ	Togaviridae	NC_001786.1 Barmah Forest virus	-
s41	9	0	1000	0.786	0.924694	1	1	GCF_000847585.1	IV	SRSF3	Togaviridae	NC_001786.1 Barmah Forest virus	+
s41	9	2	1000	0.924	1.01156	0.236309	0.731135	GCF_000847585.1	IV	SRSF3	Togaviridae	NC_001786.1 Barmah Forest virus	-
M020_0.6	7	4	1000	8.912	2.86609	0.127366	0.589395	GCF_000847585.1	IV	FXR2	Togaviridae	NC_001786.1 Barmah Forest virus	+
M020_0.6	7	4	1000	4.851	2.14789	1	1	GCF_000847585.1	IV	FXR2	Togaviridae	NC_001786.1 Barmah Forest virus	-
encode_SRSF8_1	5	35	1000	28.271	5.07852	0.219254	0.75177	GCF_000847585.1	IV	SRSF8	Togaviridae	NC_001786.1 Barmah Forest virus	+
encode_SRSF8_1	5	32	1000	22.124	4.37856	0.0423281	0.424724	GCF_000847585.1	IV	SRSF8	Togaviridae	NC_001786.1 Barmah Forest virus	-
1215	8	8	1000	10.855	3.19095	0.540478	0.973397	GCF_000847585.1	IV	QKI	Togaviridae	NC_001786.1 Barmah Forest virus	+
1215	8	5	1000	9.689	3.14295	0.147898	0.632452	GCF_000847585.1	IV	QKI	Togaviridae	NC_001786.1 Barmah Forest virus	-
M071_0.6	8	1	1000	2.008	1.44569	0.72931	1	GCF_000847585.1	IV	SRSF7	Togaviridae	NC_001786.1 Barmah Forest virus	+
M071_0.6	8	0	1000	0.853	0.940359	1	1	GCF_000847585.1	IV	SRSF7	Togaviridae	NC_001786.1 Barmah Forest virus	-
M169_0.6	7	7	1000	8.831	3.13021	0.7343	1	GCF_000847585.1	IV	HNRNPLL	Togaviridae	NC_001786.1 Barmah Forest virus	+
M169_0.6	7	4	1000	3.573	1.9366	0.786566	1	GCF_000847585.1	IV	HNRNPLL	Togaviridae	NC_001786.1 Barmah Forest virus	-
M354_0.6	6	62	1000	64.334	8.10062	0.851079	1	GCF_000847585.1	IV	YTHDC1	Togaviridae	NC_001786.1 Barmah Forest virus	+
M354_0.6	6	75	1000	62.395	7.86517	0.112174	0.560552	GCF_000847585.1	IV	YTHDC1	Togaviridae	NC_001786.1 Barmah Forest virus	-
encode_RBM22_1	5	13	1000	9.215	2.95254	0.243491	0.772296	GCF_000847585.1	IV	RBM22	Togaviridae	NC_001786.1 Barmah Forest virus	+
encode_RBM22_1	5	8	1000	6.858	2.56991	0.566393	0.967143	GCF_000847585.1	IV	RBM22	Togaviridae	NC_001786.1 Barmah Forest virus	-
encode_RBM24_3	5	5	1000	6.674	3.09537	0.697017	1	GCF_000847585.1	IV	RBM24	Togaviridae	NC_001786.1 Barmah Forest virus	+
encode_RBM24_3	5	5	1000	12.332	4.11372	0.0315934	0.391697	GCF_000847585.1	IV	RBM24	Togaviridae	NC_001786.1 Barmah Forest virus	-
1343	6	99	1000	91.056	8.53591	0.399562	0.878893	GCF_000847585.1	IV	SRSF5	Togaviridae	NC_001786.1 Barmah Forest virus	+
1343	6	115	1000	74.97	7.88868	1.65102e-05	0.00388932	GCF_000847585.1	IV	SRSF5	Togaviridae	NC_001786.1 Barmah Forest virus	-
encode_MBNL1_3	5	8	1000	9.251	2.90318	0.868645	1	GCF_000847585.1	IV	MBNL1	Togaviridae	NC_001786.1 Barmah Forest virus	+
encode_MBNL1_3	5	16	1000	13.736	3.48575	0.498405	0.911225	GCF_000847585.1	IV	MBNL1	Togaviridae	NC_001786.1 Barmah Forest virus	-
1285	6	4	1000	5.063	2.2931	0.824564	1	GCF_000847585.1	IV	ZRANB2	Togaviridae	NC_001786.1 Barmah Forest virus	+
1285	6	4	1000	3.589	1.84594	0.787119	1	GCF_000847585.1	IV	ZRANB2	Togaviridae	NC_001786.1 Barmah Forest virus	-
encode_PTBP3_1	6	2	1000	2.612	1.61123	1	1	GCF_000847585.1	IV	PTBP3	Togaviridae	NC_001786.1 Barmah Forest virus	+
encode_PTBP3_1	6	12	1000	11.295	3.25862	0.765177	1	GCF_000847585.1	IV	PTBP3	Togaviridae	NC_001786.1 Barmah Forest virus	-
M016_0.6	7	1	1000	5.887	2.3194	0.0367301	0.332407	GCF_000847585.1	IV	FMR1	Togaviridae	NC_001786.1 Barmah Forest virus	+
M016_0.6	7	3	1000	3.501	1.77458	1	1	GCF_000847585.1	IV	FMR1	Togaviridae	NC_001786.1 Barmah Forest virus	-
M153_0.6	7	6	1000	3.085	1.7049	0.138413	0.622099	GCF_000847585.1	IV	LIN28A	Togaviridae	NC_001786.1 Barmah Forest virus	+
M153_0.6	7	4	1000	2.582	1.58612	0.335678	0.799444	GCF_000847585.1	IV	LIN28A	Togaviridae	NC_001786.1 Barmah Forest virus	-
s33	6	9	1000	8.376	2.74265	0.729345	1	GCF_000847585.1	IV	KHDRBS1	Togaviridae	NC_001786.1 Barmah Forest virus	+
s33	6	10	1000	11.204	3.28926	0.880788	1	GCF_000847585.1	IV	KHDRBS1	Togaviridae	NC_001786.1 Barmah Forest virus	-
encode_KHDRBS3_1	5	19	1000	24.663	4.62762	0.311872	0.806412	GCF_000847585.1	IV	KHDRBS3	Togaviridae	NC_001786.1 Barmah Forest virus	+
encode_KHDRBS3_1	5	13	1000	15.085	3.66677	0.699012	1	GCF_000847585.1	IV	KHDRBS3	Togaviridae	NC_001786.1 Barmah Forest virus	-
949	7	1	1000	2.708	1.65332	0.534841	0.972926	GCF_000847585.1	IV	SNRPA	Togaviridae	NC_001786.1 Barmah Forest virus	+
949	7	0	1000	1.415	1.15156	0.413034	0.83791	GCF_000847585.1	IV	SNRPA	Togaviridae	NC_001786.1 Barmah Forest virus	-
M022_0.6	7	3	1000	3.927	1.89453	1	1	GCF_000847585.1	IV	HNRNPA1	Togaviridae	NC_001786.1 Barmah Forest virus	+
M022_0.6	7	7	1000	4.306	1.9744	0.216416	0.725165	GCF_000847585.1	IV	HNRNPA1	Togaviridae	NC_001786.1 Barmah Forest virus	-
M031_0.6	7	3	1000	2.084	1.44673	0.470457	0.945326	GCF_000847585.1	IV	ELAVL1	Togaviridae	NC_001786.1 Barmah Forest virus	+
M031_0.6	7	4	1000	7.409	2.79491	0.268757	0.750637	GCF_000847585.1	IV	ELAVL1	Togaviridae	NC_001786.1 Barmah Forest virus	-
M035_0.6	7	4	1000	5.689	2.32544	0.672643	1	GCF_000847585.1	IV	LIN28A	Togaviridae	NC_001786.1 Barmah Forest virus	+
M035_0.6	7	3	1000	2.173	1.42165	0.483854	0.889113	GCF_000847585.1	IV	LIN28A	Togaviridae	NC_001786.1 Barmah Forest virus	-
M081_0.6	7	6	1000	5.295	2.30549	0.661632	1	GCF_000847585.1	IV	YBX1	Togaviridae	NC_001786.1 Barmah Forest virus	+
M081_0.6	7	1	1000	3.589	1.87125	0.281075	0.750637	GCF_000847585.1	IV	YBX1	Togaviridae	NC_001786.1 Barmah Forest virus	-
M086_0.6	7	17	1000	12.191	3.84803	0.19325	0.699565	GCF_000847585.1	IV	SRSF10	Togaviridae	NC_001786.1 Barmah Forest virus	+
M086_0.6	7	2	1000	2.761	1.80974	1	1	GCF_000847585.1	IV	SRSF10	Togaviridae	NC_001786.1 Barmah Forest virus	-
M102_0.6	6	13	1000	9.736	2.96802	0.261689	0.772296	GCF_000847585.1	IV	SRSF1	Togaviridae	NC_001786.1 Barmah Forest virus	+
M102_0.6	6	6	1000	5.635	2.34847	0.830907	1	GCF_000847585.1	IV	SRSF1	Togaviridae	NC_001786.1 Barmah Forest virus	-
M103_0.6	6	13	1000	9.736	2.96802	0.261689	0.772296	GCF_000847585.1	IV	SRSF1	Togaviridae	NC_001786.1 Barmah Forest virus	+
M103_0.6	6	6	1000	5.635	2.34847	0.830907	1	GCF_000847585.1	IV	SRSF1	Togaviridae	NC_001786.1 Barmah Forest virus	-
M298_0.6	6	4	1000	3.922	1.97378	0.800883	1	GCF_000847585.1	IV	RBFOX1	Togaviridae	NC_001786.1 Barmah Forest virus	+
M298_0.6	6	5	1000	5.263	2.28584	1	1	GCF_000847585.1	IV	RBFOX1	Togaviridae	NC_001786.1 Barmah Forest virus	-
M348_0.6	7	1	1000	2.708	1.65332	0.534841	0.972926	GCF_000847585.1	IV	SNRPA	Togaviridae	NC_001786.1 Barmah Forest virus	+
M348_0.6	7	0	1000	1.415	1.15156	0.413034	0.83791	GCF_000847585.1	IV	SNRPA	Togaviridae	NC_001786.1 Barmah Forest virus	-
encode_ELAVL4_1	5	24	1000	12.223	3.70392	0.00228114	0.0538173	GCF_000847585.1	IV	ELAVL4	Togaviridae	NC_001786.1 Barmah Forest virus	+
encode_ELAVL4_1	5	34	1000	33.619	6.3383	0.931026	1	GCF_000847585.1	IV	ELAVL4	Togaviridae	NC_001786.1 Barmah Forest virus	-
encode_EWSR1_2	5	9	1000	13.618	3.63859	0.275184	0.784381	GCF_000847585.1	IV	EWSR1	Togaviridae	NC_001786.1 Barmah Forest virus	+
encode_EWSR1_2	5	21	1000	13.349	3.76023	0.052708	0.437393	GCF_000847585.1	IV	EWSR1	Togaviridae	NC_001786.1 Barmah Forest virus	-
encode_FUBP3_2	5	25	1000	12.365	3.86662	0.00140529	0.0522095	GCF_000847585.1	IV	FUBP3	Togaviridae	NC_001786.1 Barmah Forest virus	+
encode_FUBP3_2	5	36	1000	33.516	6.28293	0.664617	1	GCF_000847585.1	IV	FUBP3	Togaviridae	NC_001786.1 Barmah Forest virus	-
encode_HNRNPA0_1	5	34	1000	29.783	5.23003	0.408803	0.886149	GCF_000847585.1	IV	HNRNPA0	Togaviridae	NC_001786.1 Barmah Forest virus	+
encode_HNRNPA0_1	5	22	1000	25.581	4.76005	0.552293	0.952047	GCF_000847585.1	IV	HNRNPA0	Togaviridae	NC_001786.1 Barmah Forest virus	-
encode_HNRNPA2B1_2	5	8	1000	7.913	2.6628	0.858908	1	GCF_000847585.1	IV	HNRNPA2B1	Togaviridae	NC_001786.1 Barmah Forest virus	+
encode_HNRNPA2B1_2	5	11	1000	10.829	3.24412	0.87885	1	GCF_000847585.1	IV	HNRNPA2B1	Togaviridae	NC_001786.1 Barmah Forest virus	-
encode_HNRNPDL_2	5	9	1000	7.107	2.78555	0.448294	0.938048	GCF_000847585.1	IV	HNRNPDL	Togaviridae	NC_001786.1 Barmah Forest virus	+
encode_HNRNPDL_2	5	8	1000	9.637	3.17448	0.746681	1	GCF_000847585.1	IV	HNRNPDL	Togaviridae	NC_001786.1 Barmah Forest virus	-
encode_HNRNPL_1	5	37	1000	43.052	6.64947	0.400601	0.878893	GCF_000847585.1	IV	HNRNPL	Togaviridae	NC_001786.1 Barmah Forest virus	+
encode_HNRNPL_1	5	31	1000	21.46	4.69345	0.0503613	0.434066	GCF_000847585.1	IV	HNRNPL	Togaviridae	NC_001786.1 Barmah Forest virus	-
encode_IGF2BP2_1	7	17	1000	13.351	3.59677	0.334327	0.828947	GCF_000847585.1	IV	IGF2BP2	Togaviridae	NC_001786.1 Barmah Forest virus	+
encode_IGF2BP2_1	7	5	1000	5.428	2.31044	1	1	GCF_000847585.1	IV	IGF2BP2	Togaviridae	NC_001786.1 Barmah Forest virus	-
encode_ILF2_2	5	8	1000	7.913	2.6628	0.858908	1	GCF_000847585.1	IV	ILF2	Togaviridae	NC_001786.1 Barmah Forest virus	+
encode_ILF2_2	5	11	1000	10.829	3.24412	0.87885	1	GCF_000847585.1	IV	ILF2	Togaviridae	NC_001786.1 Barmah Forest virus	-
encode_PRR3_1	5	22	1000	39.755	5.89981	0.00316272	0.0673473	GCF_000847585.1	IV	PRR3	Togaviridae	NC_001786.1 Barmah Forest virus	+
encode_PRR3_1	5	16	1000	20.808	4.4859	0.378005	0.82932	GCF_000847585.1	IV	PRR3	Togaviridae	NC_001786.1 Barmah Forest virus	-
encode_PRR3_2	5	27	1000	21.335	4.49076	0.231105	0.772296	GCF_000847585.1	IV	PRR3	Togaviridae	NC_001786.1 Barmah Forest virus	+
encode_PRR3_2	5	12	1000	17.659	3.99558	0.231145	0.731135	GCF_000847585.1	IV	PRR3	Togaviridae	NC_001786.1 Barmah Forest virus	-
encode_RBM6_2	5	24	1000	16.833	3.98233	0.086367	0.496268	GCF_000847585.1	IV	RBM6	Togaviridae	NC_001786.1 Barmah Forest virus	+
encode_RBM6_2	5	7	1000	9.362	3.01098	0.620796	1	GCF_000847585.1	IV	RBM6	Togaviridae	NC_001786.1 Barmah Forest virus	-
encode_RC3H1_2	5	13	1000	9.154	3.04394	0.185553	0.692476	GCF_000847585.1	IV	RC3H1	Togaviridae	NC_001786.1 Barmah Forest virus	+
encode_RC3H1_2	5	10	1000	13.646	3.49641	0.414326	0.83791	GCF_000847585.1	IV	RC3H1	Togaviridae	NC_001786.1 Barmah Forest virus	-
encode_SRSF11_1	5	53	1000	54.566	6.54404	0.892079	1	GCF_000847585.1	IV	SRSF11	Togaviridae	NC_001786.1 Barmah Forest virus	+
encode_SRSF11_1	5	36	1000	31.428	5.30122	0.420163	0.844994	GCF_000847585.1	IV	SRSF11	Togaviridae	NC_001786.1 Barmah Forest virus	-
encode_SRSF9_2	5	11	1000	11.416	3.13573	1	1	GCF_000847585.1	IV	SRSF9	Togaviridae	NC_001786.1 Barmah Forest virus	+
encode_SRSF9_2	5	5	1000	8.344	2.79419	0.299879	0.757318	GCF_000847585.1	IV	SRSF9	Togaviridae	NC_001786.1 Barmah Forest virus	-
encode_TAF15_2	5	8	1000	7.913	2.6628	0.858908	1	GCF_000847585.1	IV	TAF15	Togaviridae	NC_001786.1 Barmah Forest virus	+
encode_TAF15_2	5	11	1000	10.829	3.24412	0.87885	1	GCF_000847585.1	IV	TAF15	Togaviridae	NC_001786.1 Barmah Forest virus	-
encode_TARDBP_1	5	43	1000	38.525	5.79922	0.466738	0.945326	GCF_000847585.1	IV	TARDBP	Togaviridae	NC_001786.1 Barmah Forest virus	+
encode_TARDBP_1	5	57	1000	45.806	6.54792	0.102741	0.555108	GCF_000847585.1	IV	TARDBP	Togaviridae	NC_001786.1 Barmah Forest virus	-
encode_ZFP36_2	5	7	1000	9.27	3.11718	0.619565	1	GCF_000847585.1	IV	ZFP36	Togaviridae	NC_001786.1 Barmah Forest virus	+
encode_ZFP36_2	5	11	1000	7.342	2.71374	0.190022	0.68788	GCF_000847585.1	IV	ZFP36	Togaviridae	NC_001786.1 Barmah Forest virus	-
s101	7	4	1000	1.722	1.43833	0.0964933	0.521352	GCF_000847585.1	IV	ELAVL1	Togaviridae	NC_001786.1 Barmah Forest virus	+
s101	7	7	1000	7.219	3.09946	1	1	GCF_000847585.1	IV	ELAVL1	Togaviridae	NC_001786.1 Barmah Forest virus	-
s103	7	19	1000	17.813	4.95687	0.721641	1	GCF_000847585.1	IV	KHDRBS3	Togaviridae	NC_001786.1 Barmah Forest virus	+
s103	7	10	1000	5.671	2.7811	0.0860412	0.512605	GCF_000847585.1	IV	KHDRBS3	Togaviridae	NC_001786.1 Barmah Forest virus	-
s104	7	17	1000	10.498	3.51886	0.0605566	0.421567	GCF_000847585.1	IV	SRSF10	Togaviridae	NC_001786.1 Barmah Forest virus	+
s104	7	3	1000	2.03	1.50843	0.462756	0.876705	GCF_000847585.1	IV	SRSF10	Togaviridae	NC_001786.1 Barmah Forest virus	-
s12	5	13	1000	11.711	3.32423	0.659426	1	GCF_000847585.1	IV	PTBP1	Togaviridae	NC_001786.1 Barmah Forest virus	+
s12	5	42	1000	40.693	5.9257	0.813495	1	GCF_000847585.1	IV	PTBP1	Togaviridae	NC_001786.1 Barmah Forest virus	-
s15	6	49	1000	51.822	6.36921	0.780375	1	GCF_000847585.1	IV	HNRNPK	Togaviridae	NC_001786.1 Barmah Forest virus	+
s15	6	31	1000	37.445	5.71626	0.325806	0.781071	GCF_000847585.1	IV	HNRNPK	Togaviridae	NC_001786.1 Barmah Forest virus	-
s19	5	60	1000	60.561	7.14936	1	1	GCF_000847585.1	IV	SRSF5	Togaviridae	NC_001786.1 Barmah Forest virus	+
s19	5	47	1000	49.507	6.49169	0.775886	1	GCF_000847585.1	IV	SRSF5	Togaviridae	NC_001786.1 Barmah Forest virus	-
s20	6	15	1000	18.515	3.95239	0.485154	0.959703	GCF_000847585.1	IV	ZRANB2	Togaviridae	NC_001786.1 Barmah Forest virus	+
s20	6	34	1000	25.752	5.01095	0.11304	0.560552	GCF_000847585.1	IV	ZRANB2	Togaviridae	NC_001786.1 Barmah Forest virus	-
s36	7	7	1000	3.756	1.91576	0.110158	0.56165	GCF_000847585.1	IV	HNRNPDL	Togaviridae	NC_001786.1 Barmah Forest virus	+
s36	7	2	1000	2.432	1.51977	1	1	GCF_000847585.1	IV	HNRNPDL	Togaviridae	NC_001786.1 Barmah Forest virus	-
s57	10	0	1000	0.123	0.349275	1	1	GCF_000847585.1	IV	SRSF2	Togaviridae	NC_001786.1 Barmah Forest virus	+
s57	10	0	1000	0.223	0.464205	1	1	GCF_000847585.1	IV	SRSF2	Togaviridae	NC_001786.1 Barmah Forest virus	-
s60	8	4	1000	3.084	1.74814	0.558492	0.976095	GCF_000847585.1	IV	SRSF1	Togaviridae	NC_001786.1 Barmah Forest virus	+
s60	8	1	1000	1.128	1.04341	1	1	GCF_000847585.1	IV	SRSF1	Togaviridae	NC_001786.1 Barmah Forest virus	-
M108_0.6	7	3	1000	1.237	1.0918	0.128625	0.589395	GCF_000847585.1	IV	ELAVL1	Togaviridae	NC_001786.1 Barmah Forest virus	+
M108_0.6	7	7	1000	4.354	2.09692	0.219465	0.725165	GCF_000847585.1	IV	ELAVL1	Togaviridae	NC_001786.1 Barmah Forest virus	-
s29	7	4	1000	2.906	1.75506	0.545313	0.976095	GCF_000847585.1	IV	NOVA2	Togaviridae	NC_001786.1 Barmah Forest virus	+
s29	7	1	1000	1.872	1.37095	1	1	GCF_000847585.1	IV	NOVA2	Togaviridae	NC_001786.1 Barmah Forest virus	-
155	6	74	1000	73.607	8.23252	0.95333	1	GCF_000847585.1	IV	ZFP36	Togaviridae	NC_001786.1 Barmah Forest virus	+
155	6	176	1000	146.278	10.8868	0.0157169	0.379302	GCF_000847585.1	IV	ZFP36	Togaviridae	NC_001786.1 Barmah Forest virus	-
M104_0.6	7	6	1000	6.427	2.52131	1	1	GCF_000847585.1	IV	SRSF1	Togaviridae	NC_001786.1 Barmah Forest virus	+
M104_0.6	7	4	1000	4.026	1.99482	1	1	GCF_000847585.1	IV	SRSF1	Togaviridae	NC_001786.1 Barmah Forest virus	-
M157_0.6	7	4	1000	2.963	1.84365	0.549183	0.976095	GCF_000847585.1	IV	CELF5	Togaviridae	NC_001786.1 Barmah Forest virus	+
M157_0.6	7	11	1000	8.519	3.04613	0.386754	0.836726	GCF_000847585.1	IV	CELF5	Togaviridae	NC_001786.1 Barmah Forest virus	-
encode_TRNAU1AP_2	5	24	1000	20.063	4.18432	0.369627	0.863258	GCF_000847585.1	IV	TRNAU1AP	Togaviridae	NC_001786.1 Barmah Forest virus	+
encode_TRNAU1AP_2	5	13	1000	18.6	4.23083	0.243721	0.735225	GCF_000847585.1	IV	TRNAU1AP	Togaviridae	NC_001786.1 Barmah Forest virus	-
M051_0.6	7	8	1000	5.113	2.32715	0.182152	0.692476	GCF_000847585.1	IV	RBM41	Togaviridae	NC_001786.1 Barmah Forest virus	+
M051_0.6	7	10	1000	7.496	2.76181	0.355349	0.810646	GCF_000847585.1	IV	RBM41	Togaviridae	NC_001786.1 Barmah Forest virus	-
M307_0.6	5	14	1000	13.432	3.49336	0.785063	1	GCF_000847585.1	IV	NONO	Togaviridae	NC_001786.1 Barmah Forest virus	+
M307_0.6	5	9	1000	7.841	2.67935	0.591407	0.991155	GCF_000847585.1	IV	NONO	Togaviridae	NC_001786.1 Barmah Forest virus	-
encode_HNRNPDL_3	5	11	1000	13.155	3.30422	0.678234	1	GCF_000847585.1	IV	HNRNPDL	Togaviridae	NC_001786.1 Barmah Forest virus	+
encode_HNRNPDL_3	5	7	1000	6.852	2.47835	0.847985	1	GCF_000847585.1	IV	HNRNPDL	Togaviridae	NC_001786.1 Barmah Forest virus	-
encode_PUF60_1	5	24	1000	11.452	3.64705	0.000925815	0.0478779	GCF_000847585.1	IV	PUF60	Togaviridae	NC_001786.1 Barmah Forest virus	+
encode_PUF60_1	5	56	1000	40.628	6.59235	0.0221492	0.391697	GCF_000847585.1	IV	PUF60	Togaviridae	NC_001786.1 Barmah Forest virus	-
M021_0.6	7	2	1000	4.459	2.10398	0.341882	0.837972	GCF_000847585.1	IV	G3BP2	Togaviridae	NC_001786.1 Barmah Forest virus	+
M021_0.6	7	2	1000	2.407	1.54199	1	1	GCF_000847585.1	IV	G3BP2	Togaviridae	NC_001786.1 Barmah Forest virus	-
M176_0.6	7	5	1000	5.273	2.22068	1	1	GCF_000847585.1	IV	KHDRBS2	Togaviridae	NC_001786.1 Barmah Forest virus	+
M176_0.6	7	2	1000	2.129	1.45893	1	1	GCF_000847585.1	IV	KHDRBS2	Togaviridae	NC_001786.1 Barmah Forest virus	-
M232_0.6	7	1	1000	0.64	0.983548	0.472717	0.945326	GCF_000847585.1	IV	ELAVL1	Togaviridae	NC_001786.1 Barmah Forest virus	+
M232_0.6	7	5	1000	2.952	2.21915	0.22893	0.731135	GCF_000847585.1	IV	ELAVL1	Togaviridae	NC_001786.1 Barmah Forest virus	-
encode_EIF4G2_2	5	11	1000	9.634	3.09024	0.626155	1	GCF_000847585.1	IV	EIF4G2	Togaviridae	NC_001786.1 Barmah Forest virus	+
encode_EIF4G2_2	5	0	1000	5.723	2.31033	0.00566174	0.362112	GCF_000847585.1	IV	EIF4G2	Togaviridae	NC_001786.1 Barmah Forest virus	-
encode_HNRNPC_1	5	18	1000	5.834	2.91014	3.98244e-05	0.00720822	GCF_000847585.1	IV	HNRNPC	Togaviridae	NC_001786.1 Barmah Forest virus	+
encode_HNRNPC_1	5	29	1000	19.56	5.33675	0.0405322	0.419219	GCF_000847585.1	IV	HNRNPC	Togaviridae	NC_001786.1 Barmah Forest virus	-
encode_NUPL2_2	6	16	1000	19.807	4.30445	0.498103	0.960691	GCF_000847585.1	IV	NUPL2	Togaviridae	NC_001786.1 Barmah Forest virus	+
encode_NUPL2_2	6	7	1000	10.543	3.17714	0.353265	0.810646	GCF_000847585.1	IV	NUPL2	Togaviridae	NC_001786.1 Barmah Forest virus	-
encode_PCBP4_1	5	29	1000	38.004	5.52653	0.166199	0.646925	GCF_000847585.1	IV	PCBP4	Togaviridae	NC_001786.1 Barmah Forest virus	+
encode_PCBP4_1	5	39	1000	41.606	5.50719	0.756013	1	GCF_000847585.1	IV	PCBP4	Togaviridae	NC_001786.1 Barmah Forest virus	-
encode_RBM6_1	6	20	1000	12.008	3.38754	0.0288858	0.285849	GCF_000847585.1	IV	RBM6	Togaviridae	NC_001786.1 Barmah Forest virus	+
encode_RBM6_1	6	10	1000	10.411	3.1391	1	1	GCF_000847585.1	IV	RBM6	Togaviridae	NC_001786.1 Barmah Forest virus	-
s11	7	4	1000	2.301	1.47803	0.300978	0.795727	GCF_000847585.1	IV	TIA1	Togaviridae	NC_001786.1 Barmah Forest virus	+
s11	7	6	1000	7.32	2.62459	0.852007	1	GCF_000847585.1	IV	TIA1	Togaviridae	NC_001786.1 Barmah Forest virus	-
s13	5	18	1000	5.834	2.91014	3.98244e-05	0.00720822	GCF_000847585.1	IV	HNRNPC	Togaviridae	NC_001786.1 Barmah Forest virus	+
s13	5	29	1000	19.56	5.33675	0.0405322	0.419219	GCF_000847585.1	IV	HNRNPC	Togaviridae	NC_001786.1 Barmah Forest virus	-
s39	7	8	1000	7.095	2.71576	0.704103	1	GCF_000847585.1	IV	SRSF3	Togaviridae	NC_001786.1 Barmah Forest virus	+
s39	7	6	1000	5.34	2.31339	0.663922	1	GCF_000847585.1	IV	SRSF3	Togaviridae	NC_001786.1 Barmah Forest virus	-
M004_0.6	7	6	1000	4.291	2.28463	0.334225	0.828947	GCF_000847585.1	IV	CELF4	Togaviridae	NC_001786.1 Barmah Forest virus	+
M004_0.6	7	15	1000	12.283	3.88665	0.391285	0.836726	GCF_000847585.1	IV	CELF4	Togaviridae	NC_001786.1 Barmah Forest virus	-
M026_0.6	7	7	1000	5.041	2.20095	0.364991	0.857966	GCF_000847585.1	IV	HNRNPK	Togaviridae	NC_001786.1 Barmah Forest virus	+
M026_0.6	7	2	1000	2.601	1.56405	1	1	GCF_000847585.1	IV	HNRNPK	Togaviridae	NC_001786.1 Barmah Forest virus	-
M044_0.6	7	2	1000	2.728	1.73234	1	1	GCF_000847585.1	IV	PPRC1	Togaviridae	NC_001786.1 Barmah Forest virus	+
M044_0.6	7	2	1000	2.491	1.66032	1	1	GCF_000847585.1	IV	PPRC1	Togaviridae	NC_001786.1 Barmah Forest virus	-
M069_0.6	7	7	1000	5.52	2.38858	0.516466	0.971534	GCF_000847585.1	IV	SNRPA	Togaviridae	NC_001786.1 Barmah Forest virus	+
M069_0.6	7	3	1000	4.203	1.94771	0.805571	1	GCF_000847585.1	IV	SNRPA	Togaviridae	NC_001786.1 Barmah Forest virus	-
M127_0.6	7	3	1000	2.736	1.57251	0.757339	1	GCF_000847585.1	IV	ELAVL1	Togaviridae	NC_001786.1 Barmah Forest virus	+
M127_0.6	7	11	1000	7.993	2.72073	0.283305	0.750637	GCF_000847585.1	IV	ELAVL1	Togaviridae	NC_001786.1 Barmah Forest virus	-
encode_ELAVL4_2	5	4	1000	8.303	2.95193	0.162895	0.640958	GCF_000847585.1	IV	ELAVL4	Togaviridae	NC_001786.1 Barmah Forest virus	+
encode_ELAVL4_2	5	14	1000	11.164	3.25418	0.366821	0.810646	GCF_000847585.1	IV	ELAVL4	Togaviridae	NC_001786.1 Barmah Forest virus	-
s2	6	24	1000	14.664	3.4051	0.0247282	0.271261	GCF_000847585.1	IV	ELAVL2	Togaviridae	NC_001786.1 Barmah Forest virus	+
s2	6	42	1000	36.962	4.96076	0.408954	0.83791	GCF_000847585.1	IV	ELAVL2	Togaviridae	NC_001786.1 Barmah Forest virus	-
1393	7	18	1000	22.63	4.58215	0.3987	0.878893	GCF_000847585.1	IV	SRSF1	Togaviridae	NC_001786.1 Barmah Forest virus	+
1393	7	14	1000	14.327	3.56269	1	1	GCF_000847585.1	IV	SRSF1	Togaviridae	NC_001786.1 Barmah Forest virus	-
M043_0.6	7	1	1000	3.981	2.16364	0.201609	0.7226	GCF_000847585.1	IV	PCBP2	Togaviridae	NC_001786.1 Barmah Forest virus	+
M043_0.6	7	9	1000	4.647	2.21208	0.0570081	0.448629	GCF_000847585.1	IV	PCBP2	Togaviridae	NC_001786.1 Barmah Forest virus	-
M290_0.6	7	6	1000	5.954	2.3553	0.838136	1	GCF_000847585.1	IV	EIF4B	Togaviridae	NC_001786.1 Barmah Forest virus	+
M290_0.6	7	10	1000	5.966	2.44966	0.0993945	0.54681	GCF_000847585.1	IV	EIF4B	Togaviridae	NC_001786.1 Barmah Forest virus	-
encode_IGF2BP1_1	5	16	1000	16.309	3.93764	1	1	GCF_000847585.1	IV	IGF2BP1	Togaviridae	NC_001786.1 Barmah Forest virus	+
encode_IGF2BP1_1	5	14	1000	9.271	2.99475	0.134664	0.632452	GCF_000847585.1	IV	IGF2BP1	Togaviridae	NC_001786.1 Barmah Forest virus	-
encode_MSI1_1	7	31	1000	21.732	4.55949	0.0525179	0.38023	GCF_000847585.1	IV	MSI1	Togaviridae	NC_001786.1 Barmah Forest virus	+
encode_MSI1_1	7	14	1000	21.059	4.44694	0.15417	0.641487	GCF_000847585.1	IV	MSI1	Togaviridae	NC_001786.1 Barmah Forest virus	-
s8	7	9	1000	3.664	1.85217	0.0129293	0.175208	GCF_000847585.1	IV	TIAL1	Togaviridae	NC_001786.1 Barmah Forest virus	+
s8	7	11	1000	10.398	3.03592	0.756365	1	GCF_000847585.1	IV	TIAL1	Togaviridae	NC_001786.1 Barmah Forest virus	-
encode_RC3H1_1	7	4	1000	4.252	2.01359	1	1	GCF_000847585.1	IV	RC3H1	Togaviridae	NC_001786.1 Barmah Forest virus	+
encode_RC3H1_1	7	6	1000	5.692	2.35003	0.832033	1	GCF_000847585.1	IV	RC3H1	Togaviridae	NC_001786.1 Barmah Forest virus	-
1053	5	11	1000	12.827	3.51417	0.778778	1	GCF_000847585.1	IV	RBMY1A1	Togaviridae	NC_001786.1 Barmah Forest virus	+
1053	5	8	1000	13.242	3.43179	0.168842	0.670427	GCF_000847585.1	IV	RBMY1A1	Togaviridae	NC_001786.1 Barmah Forest virus	-
1175	7	2	1000	3.52	1.82014	0.595444	1	GCF_000847585.1	IV	SNRPA	Togaviridae	NC_001786.1 Barmah Forest virus	+
1175	7	5	1000	4.47	2.10227	0.639136	1	GCF_000847585.1	IV	SNRPA	Togaviridae	NC_001786.1 Barmah Forest virus	-
126	7	30	1000	29.469	5.31218	0.853812	1	GCF_000847585.1	IV	SRSF1	Togaviridae	NC_001786.1 Barmah Forest virus	+
126	7	12	1000	11.977	3.37192	0.885365	1	GCF_000847585.1	IV	SRSF1	Togaviridae	NC_001786.1 Barmah Forest virus	-
1334	8	7	1000	11.076	3.30078	0.289665	0.790748	GCF_000847585.1	IV	SRSF2	Togaviridae	NC_001786.1 Barmah Forest virus	+
1334	8	11	1000	10.482	3.22895	0.758182	1	GCF_000847585.1	IV	SRSF2	Togaviridae	NC_001786.1 Barmah Forest virus	-
1384	7	16	1000	17.852	4.38147	0.812004	1	GCF_000847585.1	IV	SRSF6	Togaviridae	NC_001786.1 Barmah Forest virus	+
1384	7	23	1000	29.59	5.1564	0.268131	0.750637	GCF_000847585.1	IV	SRSF6	Togaviridae	NC_001786.1 Barmah Forest virus	-
169	7	0	1000	2.282	1.54948	0.183697	0.692476	GCF_000847585.1	IV	HNRNPLL	Togaviridae	NC_001786.1 Barmah Forest virus	+
169	7	6	1000	1.646	1.2932	0.00688755	0.362112	GCF_000847585.1	IV	HNRNPLL	Togaviridae	NC_001786.1 Barmah Forest virus	-
175	8	1	1000	1.987	1.34113	1	1	GCF_000847585.1	IV	KHSRP	Togaviridae	NC_001786.1 Barmah Forest virus	+
175	8	6	1000	2.655	1.61821	0.0531637	0.437393	GCF_000847585.1	IV	KHSRP	Togaviridae	NC_001786.1 Barmah Forest virus	-
33	12	0	1000	0.073	0.267848	1	1	GCF_000847585.1	IV	G3BP1	Togaviridae	NC_001786.1 Barmah Forest virus	+
33	12	0	1000	0.022	0.146757	1	1	GCF_000847585.1	IV	G3BP1	Togaviridae	NC_001786.1 Barmah Forest virus	-
351	7	10	1000	8.894	2.82077	0.615125	1	GCF_000847585.1	IV	EIF4B	Togaviridae	NC_001786.1 Barmah Forest virus	+
351	7	6	1000	6.732	2.55944	1	1	GCF_000847585.1	IV	EIF4B	Togaviridae	NC_001786.1 Barmah Forest virus	-
352	4	94	1000	99.402	8.48684	0.650051	1	GCF_000847585.1	IV	EIF4B	Togaviridae	NC_001786.1 Barmah Forest virus	+
352	4	65	1000	69.894	7.30562	0.630883	1	GCF_000847585.1	IV	EIF4B	Togaviridae	NC_001786.1 Barmah Forest virus	-
72	6	3	1000	4.351	2.00545	0.807424	1	GCF_000847585.1	IV	HNRNPA1	Togaviridae	NC_001786.1 Barmah Forest virus	+
72	6	7	1000	5.075	2.14476	0.367254	0.810646	GCF_000847585.1	IV	HNRNPA1	Togaviridae	NC_001786.1 Barmah Forest virus	-
948	11	0	1000	0.105	0.334794	1	1	GCF_000847585.1	IV	SNRPA	Togaviridae	NC_001786.1 Barmah Forest virus	+
948	11	1	1000	0.07	0.266779	0.0676064	0.470644	GCF_000847585.1	IV	SNRPA	Togaviridae	NC_001786.1 Barmah Forest virus	-
M001_0.6	7	2	1000	4.51	2.1947	0.342596	0.837972	GCF_000847585.1	IV	A1CF	Togaviridae	NC_001786.1 Barmah Forest virus	+
M001_0.6	7	3	1000	5.679	2.31977	0.395249	0.836726	GCF_000847585.1	IV	A1CF	Togaviridae	NC_001786.1 Barmah Forest virus	-
M012_0.6	7	4	1000	1.563	1.34753	0.0737838	0.450841	GCF_000847585.1	IV	CPEB2	Togaviridae	NC_001786.1 Barmah Forest virus	+
M012_0.6	7	6	1000	5.222	2.4813	0.658109	1	GCF_000847585.1	IV	CPEB2	Togaviridae	NC_001786.1 Barmah Forest virus	-
M013_0.6	7	6	1000	2.993	1.67683	0.0831876	0.48998	GCF_000847585.1	IV	DAZAP1	Togaviridae	NC_001786.1 Barmah Forest virus	+
M013_0.6	7	1	1000	2.839	1.69232	0.541229	0.94204	GCF_000847585.1	IV	DAZAP1	Togaviridae	NC_001786.1 Barmah Forest virus	-
M019_0.6	7	13	1000	8.304	2.95336	0.113892	0.571102	GCF_000847585.1	IV	SRSF10	Togaviridae	NC_001786.1 Barmah Forest virus	+
M019_0.6	7	2	1000	1.504	1.25999	0.665741	1	GCF_000847585.1	IV	SRSF10	Togaviridae	NC_001786.1 Barmah Forest virus	-
M023_0.6	7	3	1000	3.335	1.77142	1	1	GCF_000847585.1	IV	HNRNPA1L2	Togaviridae	NC_001786.1 Barmah Forest virus	+
M023_0.6	7	7	1000	3.776	1.84749	0.111529	0.560552	GCF_000847585.1	IV	HNRNPA1L2	Togaviridae	NC_001786.1 Barmah Forest virus	-
M024_0.6	6	3	1000	4.358	2.00745	0.807533	1	GCF_000847585.1	IV	HNRNPA2B1	Togaviridae	NC_001786.1 Barmah Forest virus	+
M024_0.6	6	7	1000	5.075	2.14476	0.367254	0.810646	GCF_000847585.1	IV	HNRNPA2B1	Togaviridae	NC_001786.1 Barmah Forest virus	-
M025_0.6	7	8	1000	1.853	1.50388	0.000675439	0.0407515	GCF_000847585.1	IV	HNRNPC	Togaviridae	NC_001786.1 Barmah Forest virus	+
M025_0.6	7	13	1000	6.276	2.92513	0.0142468	0.379032	GCF_000847585.1	IV	HNRNPC	Togaviridae	NC_001786.1 Barmah Forest virus	-
M027_0.6	7	14	1000	9.61	3.32851	0.146198	0.623231	GCF_000847585.1	IV	HNRNPL	Togaviridae	NC_001786.1 Barmah Forest virus	+
M027_0.6	7	6	1000	3.491	2.02386	0.171623	0.670427	GCF_000847585.1	IV	HNRNPL	Togaviridae	NC_001786.1 Barmah Forest virus	-
M036_0.6	7	3	1000	2.3	1.59391	0.504205	0.960691	GCF_000847585.1	IV	MATR3	Togaviridae	NC_001786.1 Barmah Forest virus	+
M036_0.6	7	4	1000	3.961	1.96656	0.80273	1	GCF_000847585.1	IV	MATR3	Togaviridae	NC_001786.1 Barmah Forest virus	-
M037_0.6	6	3	1000	2.112	1.47568	0.474583	0.945326	GCF_000847585.1	IV	MBNL1	Togaviridae	NC_001786.1 Barmah Forest virus	+
M037_0.6	6	1	1000	3.948	1.97768	0.200715	0.719395	GCF_000847585.1	IV	MBNL1	Togaviridae	NC_001786.1 Barmah Forest virus	-
M040_0.6	7	3	1000	2.398	1.57101	0.520656	0.971534	GCF_000847585.1	IV	MSI1	Togaviridae	NC_001786.1 Barmah Forest virus	+
M040_0.6	7	0	1000	2.361	1.58404	0.185324	0.684564	GCF_000847585.1	IV	MSI1	Togaviridae	NC_001786.1 Barmah Forest virus	-
M046_0.6	7	1	1000	3.117	1.7333	0.387045	0.870251	GCF_000847585.1	IV	QKI	Togaviridae	NC_001786.1 Barmah Forest virus	+
M046_0.6	7	1	1000	2.17	1.43985	0.731151	1	GCF_000847585.1	IV	QKI	Togaviridae	NC_001786.1 Barmah Forest virus	-
M050_0.6	7	0	1000	1.07	1.06029	0.632965	1	GCF_000847585.1	IV	RBM14	Togaviridae	NC_001786.1 Barmah Forest virus	+
M050_0.6	7	1	1000	1.335	1.23056	1	1	GCF_000847585.1	IV	RBM14	Togaviridae	NC_001786.1 Barmah Forest virus	-
M052_0.6	7	15	1000	11.465	3.35798	0.297268	0.795727	GCF_000847585.1	IV	RBM46	Togaviridae	NC_001786.1 Barmah Forest virus	+
M052_0.6	7	1	1000	6.774	2.63778	0.0187547	0.386078	GCF_000847585.1	IV	RBM46	Togaviridae	NC_001786.1 Barmah Forest virus	-
M061_0.6	7	8	1000	4.552	2.11087	0.149408	0.623231	GCF_000847585.1	IV	SAMD4A	Togaviridae	NC_001786.1 Barmah Forest virus	+
M061_0.6	7	6	1000	6.228	2.5307	1	1	GCF_000847585.1	IV	SAMD4A	Togaviridae	NC_001786.1 Barmah Forest virus	-
M068_0.6	7	6	1000	5.834	2.37657	0.835162	1	GCF_000847585.1	IV	SNRNP70	Togaviridae	NC_001786.1 Barmah Forest virus	+
M068_0.6	7	1	1000	4.105	1.9534	0.206006	0.724021	GCF_000847585.1	IV	SNRNP70	Togaviridae	NC_001786.1 Barmah Forest virus	-
M070_0.6	8	6	1000	5.856	2.46279	0.835685	1	GCF_000847585.1	IV	SRSF2	Togaviridae	NC_001786.1 Barmah Forest virus	+
M070_0.6	8	2	1000	2.078	1.37033	1	1	GCF_000847585.1	IV	SRSF2	Togaviridae	NC_001786.1 Barmah Forest virus	-
M072_0.6	7	9	1000	7.587	2.70661	0.581962	0.989062	GCF_000847585.1	IV	SRSF9	Togaviridae	NC_001786.1 Barmah Forest virus	+
M072_0.6	7	2	1000	2.618	1.61638	1	1	GCF_000847585.1	IV	SRSF9	Togaviridae	NC_001786.1 Barmah Forest virus	-
M074_0.6	6	8	1000	11.374	3.14961	0.374747	0.866653	GCF_000847585.1	IV	TARDBP	Togaviridae	NC_001786.1 Barmah Forest virus	+
M074_0.6	6	12	1000	7.904	2.72878	0.150205	0.632452	GCF_000847585.1	IV	TARDBP	Togaviridae	NC_001786.1 Barmah Forest virus	-
M082_0.6	6	8	1000	9.85	3.1584	0.748061	1	GCF_000847585.1	IV	YBX2	Togaviridae	NC_001786.1 Barmah Forest virus	+
M082_0.6	6	3	1000	5.009	2.29176	0.502806	0.914651	GCF_000847585.1	IV	YBX2	Togaviridae	NC_001786.1 Barmah Forest virus	-
M087_0.6	7	15	1000	9.222	3.19389	0.0671377	0.443465	GCF_000847585.1	IV	SRSF10	Togaviridae	NC_001786.1 Barmah Forest virus	+
M087_0.6	7	3	1000	1.72	1.37677	0.24806	0.74213	GCF_000847585.1	IV	SRSF10	Togaviridae	NC_001786.1 Barmah Forest virus	-
M088_0.6	7	16	1000	9.727	3.1652	0.052415	0.38023	GCF_000847585.1	IV	SRSF10	Togaviridae	NC_001786.1 Barmah Forest virus	+
M088_0.6	7	3	1000	1.819	1.39649	0.436633	0.854384	GCF_000847585.1	IV	SRSF10	Togaviridae	NC_001786.1 Barmah Forest virus	-
M089_0.6	7	13	1000	12.745	3.4615	0.888089	1	GCF_000847585.1	IV	HNRNPL	Togaviridae	NC_001786.1 Barmah Forest virus	+
M089_0.6	7	2	1000	4.479	2.11756	0.34213	0.807718	GCF_000847585.1	IV	HNRNPL	Togaviridae	NC_001786.1 Barmah Forest virus	-
M106_0.6	7	6	1000	9.855	3.08017	0.264543	0.772296	GCF_000847585.1	IV	SRSF1	Togaviridae	NC_001786.1 Barmah Forest virus	+
M106_0.6	7	3	1000	3.868	1.96072	1	1	GCF_000847585.1	IV	SRSF1	Togaviridae	NC_001786.1 Barmah Forest virus	-
M109_0.6	7	0	1000	0.766	0.891088	1	1	GCF_000847585.1	IV	RBM14	Togaviridae	NC_001786.1 Barmah Forest virus	+
M109_0.6	7	1	1000	1.09	1.06538	1	1	GCF_000847585.1	IV	RBM14	Togaviridae	NC_001786.1 Barmah Forest virus	-
M111_0.6	7	7	1000	6.222	2.47525	0.685682	1	GCF_000847585.1	IV	YBX1	Togaviridae	NC_001786.1 Barmah Forest virus	+
M111_0.6	7	1	1000	3.514	1.83934	0.278588	0.750637	GCF_000847585.1	IV	YBX1	Togaviridae	NC_001786.1 Barmah Forest virus	-
M140_0.6	7	10	1000	10.206	3.22459	1	1	GCF_000847585.1	IV	ENOX1	Togaviridae	NC_001786.1 Barmah Forest virus	+
M140_0.6	7	8	1000	3.927	1.9482	0.0665655	0.470644	GCF_000847585.1	IV	ENOX1	Togaviridae	NC_001786.1 Barmah Forest virus	-
M142_0.6	7	0	1000	2.242	1.47092	0.18332	0.692476	GCF_000847585.1	IV	RBM42	Togaviridae	NC_001786.1 Barmah Forest virus	+
M142_0.6	7	1	1000	1.547	1.23016	1	1	GCF_000847585.1	IV	RBM42	Togaviridae	NC_001786.1 Barmah Forest virus	-
M144_0.6	7	7	1000	5.933	2.40589	0.540148	0.973397	GCF_000847585.1	IV	PABPC3	Togaviridae	NC_001786.1 Barmah Forest virus	+
M144_0.6	7	4	1000	1.538	1.16787	0.0704893	0.481455	GCF_000847585.1	IV	PABPC3	Togaviridae	NC_001786.1 Barmah Forest virus	-
M147_0.6	6	21	1000	19.893	4.28975	0.736422	1	GCF_000847585.1	IV	CNOT4	Togaviridae	NC_001786.1 Barmah Forest virus	+
M147_0.6	6	14	1000	6.9	2.71945	0.0124341	0.379032	GCF_000847585.1	IV	CNOT4	Togaviridae	NC_001786.1 Barmah Forest virus	-
M148_0.6	6	31	1000	17.627	4.25793	0.00379009	0.0762229	GCF_000847585.1	IV	PABPN1	Togaviridae	NC_001786.1 Barmah Forest virus	+
M148_0.6	6	6	1000	3.731	1.9283	0.287692	0.750637	GCF_000847585.1	IV	PABPN1	Togaviridae	NC_001786.1 Barmah Forest virus	-
M149_0.6	7	5	1000	1.221	1.36015	0.00830173	0.14768	GCF_000847585.1	IV	CPEB4	Togaviridae	NC_001786.1 Barmah Forest virus	+
M149_0.6	7	10	1000	5.301	2.92352	0.0490434	0.433017	GCF_000847585.1	IV	CPEB4	Togaviridae	NC_001786.1 Barmah Forest virus	-
M150_0.6	7	3	1000	0.919	1.19577	0.0660143	0.443465	GCF_000847585.1	IV	RALY	Togaviridae	NC_001786.1 Barmah Forest virus	+
M150_0.6	7	8	1000	4.353	2.67835	0.0877943	0.512605	GCF_000847585.1	IV	RALY	Togaviridae	NC_001786.1 Barmah Forest virus	-
M154_0.6	7	4	1000	3.119	1.7635	0.561438	0.976095	GCF_000847585.1	IV	SRSF1	Togaviridae	NC_001786.1 Barmah Forest virus	+
M154_0.6	7	1	1000	1.79	1.38485	1	1	GCF_000847585.1	IV	SRSF1	Togaviridae	NC_001786.1 Barmah Forest virus	-
M158_0.6	7	8	1000	1.853	1.50388	0.000675439	0.0407515	GCF_000847585.1	IV	HNRNPCL1	Togaviridae	NC_001786.1 Barmah Forest virus	+
M158_0.6	7	13	1000	6.276	2.92513	0.0142468	0.379032	GCF_000847585.1	IV	HNRNPCL1	Togaviridae	NC_001786.1 Barmah Forest virus	-
M159_0.6	7	5	1000	6.424	2.55044	0.841619	1	GCF_000847585.1	IV	RBFOX1	Togaviridae	NC_001786.1 Barmah Forest virus	+
M159_0.6	7	7	1000	6.506	2.55392	0.842551	1	GCF_000847585.1	IV	RBFOX1	Togaviridae	NC_001786.1 Barmah Forest virus	-
M160_0.6	7	4	1000	3.72	1.77447	0.792055	1	GCF_000847585.1	IV	KHDRBS1	Togaviridae	NC_001786.1 Barmah Forest virus	+
M160_0.6	7	1	1000	1.405	1.14293	1	1	GCF_000847585.1	IV	KHDRBS1	Togaviridae	NC_001786.1 Barmah Forest virus	-
M161_0.6	7	10	1000	5.269	2.26534	0.0477689	0.367922	GCF_000847585.1	IV	RBM6	Togaviridae	NC_001786.1 Barmah Forest virus	+
M161_0.6	7	2	1000	3.204	1.69034	0.777412	1	GCF_000847585.1	IV	RBM6	Togaviridae	NC_001786.1 Barmah Forest virus	-
M164_0.6	6	7	1000	7.229	2.81327	1	1	GCF_000847585.1	IV	RBMS3	Togaviridae	NC_001786.1 Barmah Forest virus	+
M164_0.6	6	8	1000	5.513	2.47911	0.279603	0.750637	GCF_000847585.1	IV	RBMS3	Togaviridae	NC_001786.1 Barmah Forest virus	-
M167_0.6	7	6	1000	3.749	1.87817	0.2887	0.790748	GCF_000847585.1	IV	MSI1	Togaviridae	NC_001786.1 Barmah Forest virus	+
M167_0.6	7	0	1000	3.258	1.83816	0.0866573	0.512605	GCF_000847585.1	IV	MSI1	Togaviridae	NC_001786.1 Barmah Forest virus	-
M178_0.6	7	3	1000	5.015	2.26493	0.502847	0.960691	GCF_000847585.1	IV	CELF6	Togaviridae	NC_001786.1 Barmah Forest virus	+
M178_0.6	7	7	1000	10.258	3.13612	0.431181	0.848301	GCF_000847585.1	IV	CELF6	Togaviridae	NC_001786.1 Barmah Forest virus	-
M227_0.6	7	4	1000	1.878	1.3375	0.121545	0.589395	GCF_000847585.1	IV	PTBP1	Togaviridae	NC_001786.1 Barmah Forest virus	+
M227_0.6	7	14	1000	7.957	2.74494	0.0470741	0.433017	GCF_000847585.1	IV	PTBP1	Togaviridae	NC_001786.1 Barmah Forest virus	-
M246_0.6	5	31	1000	36.675	5.61381	0.407371	0.886149	GCF_000847585.1	IV	RBMY1A1	Togaviridae	NC_001786.1 Barmah Forest virus	+
M246_0.6	5	19	1000	24.963	4.56031	0.269617	0.750637	GCF_000847585.1	IV	RBMY1A1	Togaviridae	NC_001786.1 Barmah Forest virus	-
M256_0.6	6	11	1000	13.888	3.50682	0.588991	0.99633	GCF_000847585.1	IV	ACO1	Togaviridae	NC_001786.1 Barmah Forest virus	+
M256_0.6	6	10	1000	11.478	3.33056	0.881765	1	GCF_000847585.1	IV	ACO1	Togaviridae	NC_001786.1 Barmah Forest virus	-
M271_0.6	6	3	1000	4.351	2.00545	0.807424	1	GCF_000847585.1	IV	HNRNPA1	Togaviridae	NC_001786.1 Barmah Forest virus	+
M271_0.6	6	7	1000	5.075	2.14476	0.367254	0.810646	GCF_000847585.1	IV	HNRNPA1	Togaviridae	NC_001786.1 Barmah Forest virus	-
M272_0.6	8	4	1000	2.455	1.59766	0.318678	0.812403	GCF_000847585.1	IV	SRSF1	Togaviridae	NC_001786.1 Barmah Forest virus	+
M272_0.6	8	0	1000	0.685	0.835747	1	1	GCF_000847585.1	IV	SRSF1	Togaviridae	NC_001786.1 Barmah Forest virus	-
M320_0.6	8	4	1000	3.112	1.78568	0.56084	0.976095	GCF_000847585.1	IV	MBNL1	Togaviridae	NC_001786.1 Barmah Forest virus	+
M320_0.6	8	14	1000	9.563	3.03137	0.144341	0.632452	GCF_000847585.1	IV	MBNL1	Togaviridae	NC_001786.1 Barmah Forest virus	-
M347_0.6	11	0	1000	0.105	0.334794	1	1	GCF_000847585.1	IV	SNRPA	Togaviridae	NC_001786.1 Barmah Forest virus	+
M347_0.6	11	1	1000	0.07	0.266779	0.0676064	0.470644	GCF_000847585.1	IV	SNRPA	Togaviridae	NC_001786.1 Barmah Forest virus	-
M349_0.6	7	8	1000	15.002	3.66024	0.0700106	0.450841	GCF_000847585.1	IV	PABPC1	Togaviridae	NC_001786.1 Barmah Forest virus	+
M349_0.6	7	7	1000	7.151	2.62204	1	1	GCF_000847585.1	IV	PABPC1	Togaviridae	NC_001786.1 Barmah Forest virus	-
encode_BOLL_2	6	6	1000	9.737	3.05437	0.331613	0.828947	GCF_000847585.1	IV	BOLL	Togaviridae	NC_001786.1 Barmah Forest virus	+
encode_BOLL_2	6	15	1000	15.705	3.79557	1	1	GCF_000847585.1	IV	BOLL	Togaviridae	NC_001786.1 Barmah Forest virus	-
encode_CNOT4_1	6	35	1000	33.268	5.905	0.72807	1	GCF_000847585.1	IV	CNOT4	Togaviridae	NC_001786.1 Barmah Forest virus	+
encode_CNOT4_1	6	21	1000	14.061	3.85696	0.0800708	0.50973	GCF_000847585.1	IV	CNOT4	Togaviridae	NC_001786.1 Barmah Forest virus	-
encode_DAZ3_3	6	6	1000	5.711	2.45102	0.832425	1	GCF_000847585.1	IV	DAZ3	Togaviridae	NC_001786.1 Barmah Forest virus	+
encode_DAZ3_3	6	9	1000	12.043	3.14086	0.470304	0.877578	GCF_000847585.1	IV	DAZ3	Togaviridae	NC_001786.1 Barmah Forest virus	-
encode_DAZAP1_1	6	8	1000	9.637	3.17448	0.746681	1	GCF_000847585.1	IV	DAZAP1	Togaviridae	NC_001786.1 Barmah Forest virus	+
encode_DAZAP1_1	6	9	1000	7.107	2.78555	0.448294	0.863204	GCF_000847585.1	IV	DAZAP1	Togaviridae	NC_001786.1 Barmah Forest virus	-
encode_EIF4G2_1	6	10	1000	11.533	3.32595	0.768687	1	GCF_000847585.1	IV	EIF4G2	Togaviridae	NC_001786.1 Barmah Forest virus	+
encode_EIF4G2_1	6	10	1000	18.565	4.32139	0.0471241	0.433017	GCF_000847585.1	IV	EIF4G2	Togaviridae	NC_001786.1 Barmah Forest virus	-
encode_FUBP3_3	5	8	1000	8.18	2.85197	1	1	GCF_000847585.1	IV	FUBP3	Togaviridae	NC_001786.1 Barmah Forest virus	+
encode_FUBP3_3	5	10	1000	11.117	3.24312	0.880639	1	GCF_000847585.1	IV	FUBP3	Togaviridae	NC_001786.1 Barmah Forest virus	-
encode_HNRNPA2B1_1	5	13	1000	16.207	4.56432	0.532756	0.972926	GCF_000847585.1	IV	HNRNPA2B1	Togaviridae	NC_001786.1 Barmah Forest virus	+
encode_HNRNPA2B1_1	5	15	1000	22.234	5.39113	0.136671	0.632452	GCF_000847585.1	IV	HNRNPA2B1	Togaviridae	NC_001786.1 Barmah Forest virus	-
encode_HNRNPD_1	5	11	1000	7.342	2.71374	0.190022	0.694829	GCF_000847585.1	IV	HNRNPD	Togaviridae	NC_001786.1 Barmah Forest virus	+
encode_HNRNPD_1	5	7	1000	9.27	3.11718	0.619565	1	GCF_000847585.1	IV	HNRNPD	Togaviridae	NC_001786.1 Barmah Forest virus	-
encode_HNRNPH2_1	6	7	1000	11.166	3.8462	0.290868	0.790748	GCF_000847585.1	IV	HNRNPH2	Togaviridae	NC_001786.1 Barmah Forest virus	+
encode_HNRNPH2_1	6	9	1000	18.845	4.97732	0.0202637	0.386078	GCF_000847585.1	IV	HNRNPH2	Togaviridae	NC_001786.1 Barmah Forest virus	-
encode_KHDRBS2_1	5	27	1000	35.687	5.43991	0.154156	0.623231	GCF_000847585.1	IV	KHDRBS2	Togaviridae	NC_001786.1 Barmah Forest virus	+
encode_KHDRBS2_1	5	19	1000	23.109	4.31344	0.465265	0.876705	GCF_000847585.1	IV	KHDRBS2	Togaviridae	NC_001786.1 Barmah Forest virus	-
encode_KHSRP_2	5	24	1000	12.223	3.70392	0.00228114	0.0538173	GCF_000847585.1	IV	KHSRP	Togaviridae	NC_001786.1 Barmah Forest virus	+
encode_KHSRP_2	5	34	1000	33.619	6.3383	0.931026	1	GCF_000847585.1	IV	KHSRP	Togaviridae	NC_001786.1 Barmah Forest virus	-
encode_MBNL1_2	7	4	1000	5.853	2.34241	0.675242	1	GCF_000847585.1	IV	MBNL1	Togaviridae	NC_001786.1 Barmah Forest virus	+
encode_MBNL1_2	7	8	1000	3.937	1.93979	0.0669345	0.470644	GCF_000847585.1	IV	MBNL1	Togaviridae	NC_001786.1 Barmah Forest virus	-
encode_PCBP2_2	5	23	1000	30.053	5.19357	0.233881	0.772296	GCF_000847585.1	IV	PCBP2	Togaviridae	NC_001786.1 Barmah Forest virus	+
encode_PCBP2_2	5	31	1000	28.28	4.76553	0.571765	0.971731	GCF_000847585.1	IV	PCBP2	Togaviridae	NC_001786.1 Barmah Forest virus	-
encode_PCBP2_3	5	14	1000	16.061	3.96548	0.708044	1	GCF_000847585.1	IV	PCBP2	Togaviridae	NC_001786.1 Barmah Forest virus	+
encode_PCBP2_3	5	5	1000	6.857	2.59563	0.699253	1	GCF_000847585.1	IV	PCBP2	Togaviridae	NC_001786.1 Barmah Forest virus	-
encode_PCBP4_2	5	5	1000	5.876	2.33797	1	1	GCF_000847585.1	IV	PCBP4	Togaviridae	NC_001786.1 Barmah Forest virus	+
encode_PCBP4_2	5	8	1000	10.311	3.13243	0.637854	1	GCF_000847585.1	IV	PCBP4	Togaviridae	NC_001786.1 Barmah Forest virus	-
encode_PRR3_3	5	30	1000	18.361	4.15499	0.00993518	0.154565	GCF_000847585.1	IV	PRR3	Togaviridae	NC_001786.1 Barmah Forest virus	+
encode_PRR3_3	5	12	1000	9.346	2.9494	0.408665	0.83791	GCF_000847585.1	IV	PRR3	Togaviridae	NC_001786.1 Barmah Forest virus	-
encode_PUF60_2	5	9	1000	5.44	2.32805	0.128492	0.589395	GCF_000847585.1	IV	PUF60	Togaviridae	NC_001786.1 Barmah Forest virus	+
encode_PUF60_2	5	30	1000	21.554	4.61415	0.0827611	0.50973	GCF_000847585.1	IV	PUF60	Togaviridae	NC_001786.1 Barmah Forest virus	-
encode_PUM1_2	5	9	1000	10.297	3.07119	0.875376	1	GCF_000847585.1	IV	PUM1	Togaviridae	NC_001786.1 Barmah Forest virus	+
encode_PUM1_2	5	10	1000	8.899	2.89848	0.615312	1	GCF_000847585.1	IV	PUM1	Togaviridae	NC_001786.1 Barmah Forest virus	-
encode_RALYL_1	5	31	1000	18.011	4.24699	0.00436382	0.0831423	GCF_000847585.1	IV	RALYL	Togaviridae	NC_001786.1 Barmah Forest virus	+
encode_RALYL_1	5	58	1000	54.441	7.3545	0.587099	0.98851	GCF_000847585.1	IV	RALYL	Togaviridae	NC_001786.1 Barmah Forest virus	-
encode_RBM25_1	6	16	1000	18.955	4.0745	0.566187	0.976095	GCF_000847585.1	IV	RBM25	Togaviridae	NC_001786.1 Barmah Forest virus	+
encode_RBM25_1	6	26	1000	29.981	5.12102	0.522329	0.926878	GCF_000847585.1	IV	RBM25	Togaviridae	NC_001786.1 Barmah Forest virus	-
encode_RBM45_1	5	49	1000	37.562	5.52491	0.0712781	0.450841	GCF_000847585.1	IV	RBM45	Togaviridae	NC_001786.1 Barmah Forest virus	+
encode_RBM45_1	5	28	1000	28.002	5.08998	1	1	GCF_000847585.1	IV	RBM45	Togaviridae	NC_001786.1 Barmah Forest virus	-
encode_RBM45_3	5	27	1000	32.008	5.37409	0.425496	0.906056	GCF_000847585.1	IV	RBM45	Togaviridae	NC_001786.1 Barmah Forest virus	+
encode_RBM45_3	5	26	1000	34.529	5.77932	0.17153	0.670427	GCF_000847585.1	IV	RBM45	Togaviridae	NC_001786.1 Barmah Forest virus	-
encode_RBM45_4	5	27	1000	19.91	4.29842	0.115167	0.571102	GCF_000847585.1	IV	RBM45	Togaviridae	NC_001786.1 Barmah Forest virus	+
encode_RBM45_4	5	4	1000	9.923	3.04965	0.0560474	0.448629	GCF_000847585.1	IV	RBM45	Togaviridae	NC_001786.1 Barmah Forest virus	-
encode_RBM47_1	5	28	1000	26.87	4.75939	0.771957	1	GCF_000847585.1	IV	RBM47	Togaviridae	NC_001786.1 Barmah Forest virus	+
encode_RBM47_1	5	11	1000	19.084	4.35499	0.0658456	0.470644	GCF_000847585.1	IV	RBM47	Togaviridae	NC_001786.1 Barmah Forest virus	-
encode_RBM4B_1	6	2	1000	5.206	2.26908	0.263994	0.772296	GCF_000847585.1	IV	RBM4B	Togaviridae	NC_001786.1 Barmah Forest virus	+
encode_RBM4B_1	6	7	1000	6.541	2.44792	0.842993	1	GCF_000847585.1	IV	RBM4B	Togaviridae	NC_001786.1 Barmah Forest virus	-
encode_RBM4_1	6	9	1000	9.297	3.01693	1	1	GCF_000847585.1	IV	RBM4	Togaviridae	NC_001786.1 Barmah Forest virus	+
encode_RBM4_1	6	12	1000	10.898	3.06806	0.649595	1	GCF_000847585.1	IV	RBM4	Togaviridae	NC_001786.1 Barmah Forest virus	-
encode_RBMS2_1	5	40	1000	33.466	5.61323	0.259279	0.772296	GCF_000847585.1	IV	RBMS2	Togaviridae	NC_001786.1 Barmah Forest virus	+
encode_RBMS2_1	5	40	1000	33.466	5.61323	0.259279	0.750637	GCF_000847585.1	IV	RBMS2	Togaviridae	NC_001786.1 Barmah Forest virus	-
encode_RBMS3_1	4	40	1000	33.466	5.61323	0.259279	0.772296	GCF_000847585.1	IV	RBMS3	Togaviridae	NC_001786.1 Barmah Forest virus	+
encode_RBMS3_1	4	40	1000	33.466	5.61323	0.259279	0.750637	GCF_000847585.1	IV	RBMS3	Togaviridae	NC_001786.1 Barmah Forest virus	-
encode_SFPQ_2	5	12	1000	11.467	3.34307	0.768255	1	GCF_000847585.1	IV	SFPQ	Togaviridae	NC_001786.1 Barmah Forest virus	+
encode_SFPQ_2	5	16	1000	12.9	3.51602	0.399882	0.83791	GCF_000847585.1	IV	SFPQ	Togaviridae	NC_001786.1 Barmah Forest virus	-
encode_SRSF10_1	5	65	1000	46.825	6.36372	0.0102474	0.154565	GCF_000847585.1	IV	SRSF10	Togaviridae	NC_001786.1 Barmah Forest virus	+
encode_SRSF10_1	5	46	1000	30.345	5.23693	0.00800248	0.362112	GCF_000847585.1	IV	SRSF10	Togaviridae	NC_001786.1 Barmah Forest virus	-
encode_SRSF2_1	6	29	1000	23.218	4.66328	0.21279	0.748761	GCF_000847585.1	IV	SRSF2	Togaviridae	NC_001786.1 Barmah Forest virus	+
encode_SRSF2_1	6	22	1000	11.749	3.28615	0.00755049	0.362112	GCF_000847585.1	IV	SRSF2	Togaviridae	NC_001786.1 Barmah Forest virus	-
encode_SRSF2_2	5	20	1000	13.394	3.57121	0.074725	0.450841	GCF_000847585.1	IV	SRSF2	Togaviridae	NC_001786.1 Barmah Forest virus	+
encode_SRSF2_2	5	15	1000	11.776	3.39608	0.307635	0.757318	GCF_000847585.1	IV	SRSF2	Togaviridae	NC_001786.1 Barmah Forest virus	-
encode_SRSF4_1	5	24	1000	19.241	4.23425	0.254041	0.772296	GCF_000847585.1	IV	SRSF4	Togaviridae	NC_001786.1 Barmah Forest virus	+
encode_SRSF4_1	5	14	1000	8.402	2.75971	0.0797484	0.50973	GCF_000847585.1	IV	SRSF4	Togaviridae	NC_001786.1 Barmah Forest virus	-
encode_SRSF5_1	5	13	1000	14.384	3.72994	0.894494	1	GCF_000847585.1	IV	SRSF5	Togaviridae	NC_001786.1 Barmah Forest virus	+
encode_SRSF5_1	5	18	1000	9.543	2.99752	0.0132956	0.379032	GCF_000847585.1	IV	SRSF5	Togaviridae	NC_001786.1 Barmah Forest virus	-
encode_TARDBP_2	5	15	1000	15.378	3.79361	1	1	GCF_000847585.1	IV	TARDBP	Togaviridae	NC_001786.1 Barmah Forest virus	+
encode_TARDBP_2	5	13	1000	11.796	3.44213	0.661242	1	GCF_000847585.1	IV	TARDBP	Togaviridae	NC_001786.1 Barmah Forest virus	-
encode_UNK_1	6	14	1000	17.618	4.1084	0.473295	0.945326	GCF_000847585.1	IV	UNK	Togaviridae	NC_001786.1 Barmah Forest virus	+
encode_UNK_1	6	14	1000	23.297	4.60717	0.0605486	0.466353	GCF_000847585.1	IV	UNK	Togaviridae	NC_001786.1 Barmah Forest virus	-
encode_ZCRB1_1	5	35	1000	38.274	5.82038	0.685137	1	GCF_000847585.1	IV	ZCRB1	Togaviridae	NC_001786.1 Barmah Forest virus	+
encode_ZCRB1_1	5	35	1000	38.274	5.82038	0.685137	1	GCF_000847585.1	IV	ZCRB1	Togaviridae	NC_001786.1 Barmah Forest virus	-
encode_ZFP36_1	5	14	1000	13.729	3.74427	0.892147	1	GCF_000847585.1	IV	ZFP36	Togaviridae	NC_001786.1 Barmah Forest virus	+
encode_ZFP36_1	5	18	1000	23.372	4.71952	0.30061	0.757318	GCF_000847585.1	IV	ZFP36	Togaviridae	NC_001786.1 Barmah Forest virus	-
s10	6	19	1000	16.227	3.77064	0.454992	0.941184	GCF_000847585.1	IV	TIA1	Togaviridae	NC_001786.1 Barmah Forest virus	+
s10	6	46	1000	37.674	5.36773	0.165566	0.670427	GCF_000847585.1	IV	TIA1	Togaviridae	NC_001786.1 Barmah Forest virus	-
s14	8	0	1000	1.652	1.28396	0.4218	0.9035	GCF_000847585.1	IV	HNRNPK	Togaviridae	NC_001786.1 Barmah Forest virus	+
s14	8	1	1000	0.714	0.860782	0.510329	0.919101	GCF_000847585.1	IV	HNRNPK	Togaviridae	NC_001786.1 Barmah Forest virus	-
s16	7	7	1000	6.587	2.51769	0.843612	1	GCF_000847585.1	IV	HNRNPK	Togaviridae	NC_001786.1 Barmah Forest virus	+
s16	7	3	1000	4.249	2.00425	0.806049	1	GCF_000847585.1	IV	HNRNPK	Togaviridae	NC_001786.1 Barmah Forest virus	-
s32	6	9	1000	9.817	3.09016	1	1	GCF_000847585.1	IV	HNRNPA1	Togaviridae	NC_001786.1 Barmah Forest virus	+
s32	6	14	1000	8.963	2.80633	0.0936765	0.538268	GCF_000847585.1	IV	HNRNPA1	Togaviridae	NC_001786.1 Barmah Forest virus	-
s34	6	37	1000	36.284	5.22079	0.867794	1	GCF_000847585.1	IV	KHDRBS1	Togaviridae	NC_001786.1 Barmah Forest virus	+
s34	6	25	1000	21.916	4.15863	0.519549	0.926486	GCF_000847585.1	IV	KHDRBS1	Togaviridae	NC_001786.1 Barmah Forest virus	-
s38	4	654	1000	663.39	20.8472	0.733846	1	GCF_000847585.1	IV	HNRNPL	Togaviridae	NC_001786.1 Barmah Forest virus	+
s38	4	350	1000	377.371	17.2118	0.1575	0.6479	GCF_000847585.1	IV	HNRNPL	Togaviridae	NC_001786.1 Barmah Forest virus	-
s4	5	82	1000	71.613	8.9515	0.213045	0.748761	GCF_000847585.1	IV	CELF2	Togaviridae	NC_001786.1 Barmah Forest virus	+
s4	5	204	1000	182.315	14.1818	0.108307	0.560552	GCF_000847585.1	IV	CELF2	Togaviridae	NC_001786.1 Barmah Forest virus	-
s40	7	9	1000	5.608	2.40835	0.139199	0.622099	GCF_000847585.1	IV	SRSF3	Togaviridae	NC_001786.1 Barmah Forest virus	+
s40	7	19	1000	9.12	3.04645	0.00388806	0.362112	GCF_000847585.1	IV	SRSF3	Togaviridae	NC_001786.1 Barmah Forest virus	-
s44	8	19	1000	11.783	3.37599	0.0409096	0.352602	GCF_000847585.1	IV	HNRNPDL	Togaviridae	NC_001786.1 Barmah Forest virus	+
s44	8	4	1000	5.843	2.34688	0.675045	1	GCF_000847585.1	IV	HNRNPDL	Togaviridae	NC_001786.1 Barmah Forest virus	-
s45	9	1	1000	1.053	0.984459	1	1	GCF_000847585.1	IV	SRSF7	Togaviridae	NC_001786.1 Barmah Forest virus	+
s45	9	0	1000	0.279	0.53614	1	1	GCF_000847585.1	IV	SRSF7	Togaviridae	NC_001786.1 Barmah Forest virus	-
s5	6	29	1000	24.606	5.38514	0.362532	0.857755	GCF_000847585.1	IV	CELF2	Togaviridae	NC_001786.1 Barmah Forest virus	+
s5	6	91	1000	72.265	9.06062	0.0333014	0.391697	GCF_000847585.1	IV	CELF2	Togaviridae	NC_001786.1 Barmah Forest virus	-
s50	7	16	1000	22.002	4.57306	0.239106	0.772296	GCF_000847585.1	IV	SRSF1	Togaviridae	NC_001786.1 Barmah Forest virus	+
s50	7	16	1000	13.075	3.47526	0.403733	0.83791	GCF_000847585.1	IV	SRSF1	Togaviridae	NC_001786.1 Barmah Forest virus	-
s51	7	6	1000	4.824	2.1665	0.493407	0.960691	GCF_000847585.1	IV	SRSF1	Togaviridae	NC_001786.1 Barmah Forest virus	+
s51	7	1	1000	3.16	1.88466	0.388731	0.836726	GCF_000847585.1	IV	SRSF1	Togaviridae	NC_001786.1 Barmah Forest virus	-
s53	7	3	1000	4.502	2.09628	0.639304	1	GCF_000847585.1	IV	SRSF2	Togaviridae	NC_001786.1 Barmah Forest virus	+
s53	7	0	1000	2.125	1.43786	0.285502	0.750637	GCF_000847585.1	IV	SRSF2	Togaviridae	NC_001786.1 Barmah Forest virus	-
s55	11	0	1000	0.126	0.363671	1	1	GCF_000847585.1	IV	SRSF2	Togaviridae	NC_001786.1 Barmah Forest virus	+
s55	11	1	1000	0.085	0.29302	0.081488	0.50973	GCF_000847585.1	IV	SRSF2	Togaviridae	NC_001786.1 Barmah Forest virus	-
s63	4	81	1000	76.427	8.01729	0.566243	0.976095	GCF_000847585.1	IV	TIAL1	Togaviridae	NC_001786.1 Barmah Forest virus	+
s63	4	65	1000	86.466	8.33777	0.0200769	0.386078	GCF_000847585.1	IV	TIAL1	Togaviridae	NC_001786.1 Barmah Forest virus	-
s68	4	68	1000	65.261	7.30015	0.709404	1	GCF_000847585.1	IV	TIA1	Togaviridae	NC_001786.1 Barmah Forest virus	+
s68	4	137	1000	110.04	9.49772	0.01262	0.379032	GCF_000847585.1	IV	TIA1	Togaviridae	NC_001786.1 Barmah Forest virus	-
s7	6	15	1000	12.346	3.28772	0.39356	0.878893	GCF_000847585.1	IV	TIAL1	Togaviridae	NC_001786.1 Barmah Forest virus	+
s7	6	34	1000	29.275	4.8248	0.354706	0.810646	GCF_000847585.1	IV	TIAL1	Togaviridae	NC_001786.1 Barmah Forest virus	-
s92	6	5	1000	8.535	2.93213	0.301145	0.795727	GCF_000847585.1	IV	RBFOX1	Togaviridae	NC_001786.1 Barmah Forest virus	+
s92	6	8	1000	8.234	2.78334	1	1	GCF_000847585.1	IV	RBFOX1	Togaviridae	NC_001786.1 Barmah Forest virus	-
107	8	0	1000	0.719	0.864168	1	1	GCF_000847585.1	IV	PUM2	Togaviridae	NC_001786.1 Barmah Forest virus	+
107	8	0	1000	0.635	0.767048	1	1	GCF_000847585.1	IV	PUM2	Togaviridae	NC_001786.1 Barmah Forest virus	-
114	8	0	1000	0.539	0.754353	1	1	GCF_000847585.1	IV	PUM1	Togaviridae	NC_001786.1 Barmah Forest virus	+
114	8	0	1000	0.506	0.672619	1	1	GCF_000847585.1	IV	PUM1	Togaviridae	NC_001786.1 Barmah Forest virus	-
116	8	0	1000	0.539	0.754353	1	1	GCF_000847585.1	IV	PUM2	Togaviridae	NC_001786.1 Barmah Forest virus	+
116	8	0	1000	0.506	0.672619	1	1	GCF_000847585.1	IV	PUM2	Togaviridae	NC_001786.1 Barmah Forest virus	-
129	8	0	1000	0.539	0.754353	1	1	GCF_000847585.1	IV	PUM2	Togaviridae	NC_001786.1 Barmah Forest virus	+
129	8	0	1000	0.506	0.672619	1	1	GCF_000847585.1	IV	PUM2	Togaviridae	NC_001786.1 Barmah Forest virus	-
149	7	0	1000	0.582	0.752225	1	1	GCF_000847585.1	IV	QKI	Togaviridae	NC_001786.1 Barmah Forest virus	+
149	7	0	1000	0.601	0.761826	1	1	GCF_000847585.1	IV	QKI	Togaviridae	NC_001786.1 Barmah Forest virus	-
151	8	0	1000	0.539	0.754353	1	1	GCF_000847585.1	IV	PUM1	Togaviridae	NC_001786.1 Barmah Forest virus	+
151	8	0	1000	0.506	0.672619	1	1	GCF_000847585.1	IV	PUM1	Togaviridae	NC_001786.1 Barmah Forest virus	-
221	11	0	1000	0.119	0.341988	1	1	GCF_000847585.1	IV	ZFP36	Togaviridae	NC_001786.1 Barmah Forest virus	+
221	11	0	1000	0.018	0.133018	1	1	GCF_000847585.1	IV	ZFP36	Togaviridae	NC_001786.1 Barmah Forest virus	-
61	8	1	1000	0.161	0.399047	0.148709	0.623231	GCF_000847585.1	IV	KHSRP	Togaviridae	NC_001786.1 Barmah Forest virus	+
61	8	0	1000	0.362	0.60276	1	1	GCF_000847585.1	IV	KHSRP	Togaviridae	NC_001786.1 Barmah Forest virus	-
662	7	1	1000	1.047	0.96733	1	1	GCF_000847585.1	IV	SNRPA	Togaviridae	NC_001786.1 Barmah Forest virus	+
662	7	2	1000	0.935	0.974538	0.240345	0.731135	GCF_000847585.1	IV	SNRPA	Togaviridae	NC_001786.1 Barmah Forest virus	-
78	12	1	1000	0.002	0.044699	0.001998	0.0538173	GCF_000847585.1	IV	FMR1	Togaviridae	NC_001786.1 Barmah Forest virus	+
78	12	0	1000	0.004	0.0631505	1	1	GCF_000847585.1	IV	FMR1	Togaviridae	NC_001786.1 Barmah Forest virus	-
81	8	1	1000	0.328	0.590563	0.27964	0.790748	GCF_000847585.1	IV	KHSRP	Togaviridae	NC_001786.1 Barmah Forest virus	+
81	8	1	1000	0.827	0.914279	0.562654	0.965311	GCF_000847585.1	IV	KHSRP	Togaviridae	NC_001786.1 Barmah Forest virus	-
91	10	0	1000	0.027	0.162164	1	1	GCF_000847585.1	IV	FMR1	Togaviridae	NC_001786.1 Barmah Forest virus	+
91	10	0	1000	0.032	0.181684	1	1	GCF_000847585.1	IV	FMR1	Togaviridae	NC_001786.1 Barmah Forest virus	-
M042_0.6	7	6	1000	2.826	2.17174	0.0673772	0.443465	GCF_000847585.1	IV	PABPC4	Togaviridae	NC_001786.1 Barmah Forest virus	+
M042_0.6	7	2	1000	0.562	0.920328	0.109551	0.560552	GCF_000847585.1	IV	PABPC4	Togaviridae	NC_001786.1 Barmah Forest virus	-
M055_0.6	7	4	1000	3.142	1.93638	0.563431	0.976095	GCF_000847585.1	IV	RBMS3	Togaviridae	NC_001786.1 Barmah Forest virus	+
M055_0.6	7	4	1000	2.752	1.76511	0.361176	0.810646	GCF_000847585.1	IV	RBMS3	Togaviridae	NC_001786.1 Barmah Forest virus	-
M062_0.6	7	10	1000	6.277	2.69361	0.1549	0.623231	GCF_000847585.1	IV	SART3	Togaviridae	NC_001786.1 Barmah Forest virus	+
M062_0.6	7	3	1000	1.31	1.23508	0.145187	0.632452	GCF_000847585.1	IV	SART3	Togaviridae	NC_001786.1 Barmah Forest virus	-
M073_0.6	7	6	1000	2.262	1.52633	0.0279637	0.285849	GCF_000847585.1	IV	TUT1	Togaviridae	NC_001786.1 Barmah Forest virus	+
M073_0.6	7	4	1000	2.036	1.46521	0.149415	0.632452	GCF_000847585.1	IV	TUT1	Togaviridae	NC_001786.1 Barmah Forest virus	-
M085_0.6	8	4	1000	2.843	1.64714	0.375869	0.866653	GCF_000847585.1	IV	ZCRB1	Togaviridae	NC_001786.1 Barmah Forest virus	+
M085_0.6	8	1	1000	2.089	1.47962	0.729826	1	GCF_000847585.1	IV	ZCRB1	Togaviridae	NC_001786.1 Barmah Forest virus	-
M112_0.6	7	2	1000	1.142	1.0597	0.316319	0.81211	GCF_000847585.1	IV	ELAVL1	Togaviridae	NC_001786.1 Barmah Forest virus	+
M112_0.6	7	7	1000	4.504	2.05577	0.23029	0.731135	GCF_000847585.1	IV	ELAVL1	Togaviridae	NC_001786.1 Barmah Forest virus	-
M143_0.6	7	3	1000	2.571	1.58476	0.747283	1	GCF_000847585.1	IV	RBMS1	Togaviridae	NC_001786.1 Barmah Forest virus	+
M143_0.6	7	4	1000	2.219	1.49776	0.293076	0.757318	GCF_000847585.1	IV	RBMS1	Togaviridae	NC_001786.1 Barmah Forest virus	-
M146_0.6	7	10	1000	6.277	2.69361	0.1549	0.623231	GCF_000847585.1	IV	PABPC1	Togaviridae	NC_001786.1 Barmah Forest virus	+
M146_0.6	7	3	1000	1.31	1.23508	0.145187	0.632452	GCF_000847585.1	IV	PABPC1	Togaviridae	NC_001786.1 Barmah Forest virus	-
M269_0.6	11	0	1000	0.119	0.341988	1	1	GCF_000847585.1	IV	ZFP36	Togaviridae	NC_001786.1 Barmah Forest virus	+
M269_0.6	11	0	1000	0.018	0.133018	1	1	GCF_000847585.1	IV	ZFP36	Togaviridae	NC_001786.1 Barmah Forest virus	-
M274_0.6	9	0	1000	0.309	0.545726	1	1	GCF_000847585.1	IV	SRSF2	Togaviridae	NC_001786.1 Barmah Forest virus	+
M274_0.6	9	1	1000	0.393	0.62365	0.324976	0.781071	GCF_000847585.1	IV	SRSF2	Togaviridae	NC_001786.1 Barmah Forest virus	-
M296_0.6	11	0	1000	0.025	0.156203	1	1	GCF_000847585.1	IV	IGF2BP1	Togaviridae	NC_001786.1 Barmah Forest virus	+
M296_0.6	11	0	1000	0.018	0.133018	1	1	GCF_000847585.1	IV	IGF2BP1	Togaviridae	NC_001786.1 Barmah Forest virus	-
M319_0.6	7	1	1000	1.047	0.96733	1	1	GCF_000847585.1	IV	SNRPA	Togaviridae	NC_001786.1 Barmah Forest virus	+
M319_0.6	7	2	1000	0.935	0.974538	0.240345	0.731135	GCF_000847585.1	IV	SNRPA	Togaviridae	NC_001786.1 Barmah Forest virus	-
M329_0.6	9	0	1000	0.137	0.358273	1	1	GCF_000847585.1	IV	ELAVL2	Togaviridae	NC_001786.1 Barmah Forest virus	+
M329_0.6	9	1	1000	0.441	0.65951	0.356613	0.810646	GCF_000847585.1	IV	ELAVL2	Togaviridae	NC_001786.1 Barmah Forest virus	-
M331_0.6	10	0	1000	0.233	0.484712	1	1	GCF_000847585.1	IV	SRSF7	Togaviridae	NC_001786.1 Barmah Forest virus	+
M331_0.6	10	0	1000	0.087	0.285504	1	1	GCF_000847585.1	IV	SRSF7	Togaviridae	NC_001786.1 Barmah Forest virus	-
M345_0.6	11	0	1000	0.074	0.265696	1	1	GCF_000847585.1	IV	SNRPA	Togaviridae	NC_001786.1 Barmah Forest virus	+
M345_0.6	11	0	1000	0.097	0.315738	1	1	GCF_000847585.1	IV	SNRPA	Togaviridae	NC_001786.1 Barmah Forest virus	-
M350_0.6	9	0	1000	0.174	0.440361	1	1	GCF_000847585.1	IV	ZFP36	Togaviridae	NC_001786.1 Barmah Forest virus	+
M350_0.6	9	0	1000	0.384	0.612306	1	1	GCF_000847585.1	IV	ZFP36	Togaviridae	NC_001786.1 Barmah Forest virus	-
M351_0.6	10	0	1000	0.645	0.798506	1	1	GCF_000847585.1	IV	SRSF1	Togaviridae	NC_001786.1 Barmah Forest virus	+
M351_0.6	10	0	1000	0.178	0.405562	1	1	GCF_000847585.1	IV	SRSF1	Togaviridae	NC_001786.1 Barmah Forest virus	-
M353_0.6	9	1	1000	0.819	0.865441	0.559141	0.976095	GCF_000847585.1	IV	SRSF7	Togaviridae	NC_001786.1 Barmah Forest virus	+
M353_0.6	9	0	1000	0.216	0.481223	1	1	GCF_000847585.1	IV	SRSF7	Togaviridae	NC_001786.1 Barmah Forest virus	-
s0	9	0	1000	0.107	0.321954	1	1	GCF_000847585.1	IV	ELAVL2	Togaviridae	NC_001786.1 Barmah Forest virus	+
s0	9	1	1000	0.421	0.637311	0.343615	0.807718	GCF_000847585.1	IV	ELAVL2	Togaviridae	NC_001786.1 Barmah Forest virus	-
s17	10	0	1000	0.102	0.309341	1	1	GCF_000847585.1	IV	FMR1	Togaviridae	NC_001786.1 Barmah Forest virus	+
s17	10	0	1000	0.117	0.3338	1	1	GCF_000847585.1	IV	FMR1	Togaviridae	NC_001786.1 Barmah Forest virus	-
s22	10	0	1000	0.639	0.829076	1	1	GCF_000847585.1	IV	SRSF1	Togaviridae	NC_001786.1 Barmah Forest virus	+
s22	10	0	1000	0.167	0.408997	1	1	GCF_000847585.1	IV	SRSF1	Togaviridae	NC_001786.1 Barmah Forest virus	-
s43	9	2	1000	1.025	0.982517	0.273438	0.784381	GCF_000847585.1	IV	HNRNPDL	Togaviridae	NC_001786.1 Barmah Forest virus	+
s43	9	2	1000	0.667	0.83834	0.144416	0.632452	GCF_000847585.1	IV	HNRNPDL	Togaviridae	NC_001786.1 Barmah Forest virus	-
s47	9	0	1000	0.61	0.795319	1	1	GCF_000847585.1	IV	SRSF2	Togaviridae	NC_001786.1 Barmah Forest virus	+
s47	9	3	1000	0.704	0.855053	0.0346252	0.391697	GCF_000847585.1	IV	SRSF2	Togaviridae	NC_001786.1 Barmah Forest virus	-
s56	11	0	1000	0.205	0.446289	1	1	GCF_000847585.1	IV	SRSF2	Togaviridae	NC_001786.1 Barmah Forest virus	+
s56	11	0	1000	0.24	0.467567	1	1	GCF_000847585.1	IV	SRSF2	Togaviridae	NC_001786.1 Barmah Forest virus	-
s65	9	0	1000	0.04	0.201098	1	1	GCF_000847585.1	IV	TIAL1	Togaviridae	NC_001786.1 Barmah Forest virus	+
s65	9	0	1000	0.189	0.428325	1	1	GCF_000847585.1	IV	TIAL1	Togaviridae	NC_001786.1 Barmah Forest virus	-
encode_RBM45_2	5	29	1000	26.933	4.94499	0.629934	0.985171	GCF_000850885.1	IV	RBM45	Togaviridae	NC_003908.1 Western equine encephalomyelitis virus	+
encode_RBM45_2	5	10	1000	14.573	3.63234	0.292135	0.801158	GCF_000850885.1	IV	RBM45	Togaviridae	NC_003908.1 Western equine encephalomyelitis virus	-
s27	6	39	1000	23.23	4.78498	0.00240319	0.173991	GCF_000850885.1	IV	NOVA1	Togaviridae	NC_003908.1 Western equine encephalomyelitis virus	+
s27	6	14	1000	15.253	3.94545	0.897713	1	GCF_000850885.1	IV	NOVA1	Togaviridae	NC_003908.1 Western equine encephalomyelitis virus	-
s28	6	39	1000	23.23	4.78498	0.00240319	0.173991	GCF_000850885.1	IV	NOVA2	Togaviridae	NC_003908.1 Western equine encephalomyelitis virus	+
s28	6	14	1000	15.253	3.94545	0.897713	1	GCF_000850885.1	IV	NOVA2	Togaviridae	NC_003908.1 Western equine encephalomyelitis virus	-
M145_0.6	7	3	1000	3.488	1.893	1	1	GCF_000850885.1	IV	RBM5	Togaviridae	NC_003908.1 Western equine encephalomyelitis virus	+
M145_0.6	7	1	1000	1.699	1.29772	1	1	GCF_000850885.1	IV	RBM5	Togaviridae	NC_003908.1 Western equine encephalomyelitis virus	-
encode_ESRP1_1	6	6	1000	10.895	3.35518	0.169942	0.686693	GCF_000850885.1	IV	ESRP1	Togaviridae	NC_003908.1 Western equine encephalomyelitis virus	+
encode_ESRP1_1	6	25	1000	13.777	3.81862	0.00622812	0.166816	GCF_000850885.1	IV	ESRP1	Togaviridae	NC_003908.1 Western equine encephalomyelitis virus	-
encode_MBNL1_1	5	49	1000	37.618	5.88325	0.0715455	0.628	GCF_000850885.1	IV	MBNL1	Togaviridae	NC_003908.1 Western equine encephalomyelitis virus	+
encode_MBNL1_1	5	51	1000	52.054	7.06364	0.944641	1	GCF_000850885.1	IV	MBNL1	Togaviridae	NC_003908.1 Western equine encephalomyelitis virus	-
M053_0.6	7	7	1000	3.275	1.7574	0.0493034	0.610507	GCF_000850885.1	IV	RBM5	Togaviridae	NC_003908.1 Western equine encephalomyelitis virus	+
M053_0.6	7	1	1000	1.624	1.23294	1	1	GCF_000850885.1	IV	RBM5	Togaviridae	NC_003908.1 Western equine encephalomyelitis virus	-
encode_NOVA1_1	5	45	1000	42.937	6.1632	0.702441	1	GCF_000850885.1	IV	NOVA1	Togaviridae	NC_003908.1 Western equine encephalomyelitis virus	+
encode_NOVA1_1	5	50	1000	50.606	6.59669	1	1	GCF_000850885.1	IV	NOVA1	Togaviridae	NC_003908.1 Western equine encephalomyelitis virus	-
325	7	46	1000	32.182	5.64808	0.0211041	0.451027	GCF_000850885.1	IV	SRSF1	Togaviridae	NC_003908.1 Western equine encephalomyelitis virus	+
325	7	54	1000	33.374	5.55797	0.000913924	0.0881441	GCF_000850885.1	IV	SRSF1	Togaviridae	NC_003908.1 Western equine encephalomyelitis virus	-
75	6	144	1000	135.732	15.8969	0.462881	0.915644	GCF_000850885.1	IV	PPIE	Togaviridae	NC_003908.1 Western equine encephalomyelitis virus	+
75	6	144	1000	135.732	15.8969	0.462881	0.939959	GCF_000850885.1	IV	PPIE	Togaviridae	NC_003908.1 Western equine encephalomyelitis virus	-
M048_0.6	7	5	1000	5.082	2.33382	1	1	GCF_000850885.1	IV	RBM3	Togaviridae	NC_003908.1 Western equine encephalomyelitis virus	+
M048_0.6	7	4	1000	2.526	1.57855	0.327941	0.858762	GCF_000850885.1	IV	RBM3	Togaviridae	NC_003908.1 Western equine encephalomyelitis virus	-
M065_0.6	7	10	1000	9.227	3.0507	0.740374	1	GCF_000850885.1	IV	SRSF9	Togaviridae	NC_003908.1 Western equine encephalomyelitis virus	+
M065_0.6	7	4	1000	5.674	2.34205	0.672474	1	GCF_000850885.1	IV	SRSF9	Togaviridae	NC_003908.1 Western equine encephalomyelitis virus	-
M083_0.6	7	4	1000	4.003	1.93513	1	1	GCF_000850885.1	IV	ZC3H10	Togaviridae	NC_003908.1 Western equine encephalomyelitis virus	+
M083_0.6	7	0	1000	2.866	1.6244	0.127897	0.571589	GCF_000850885.1	IV	ZC3H10	Togaviridae	NC_003908.1 Western equine encephalomyelitis virus	-
M151_0.6	7	2	1000	1.912	1.37264	0.717434	1	GCF_000850885.1	IV	HNRNPH2	Togaviridae	NC_003908.1 Western equine encephalomyelitis virus	+
M151_0.6	7	0	1000	1.045	1.03829	0.632466	1	GCF_000850885.1	IV	HNRNPH2	Togaviridae	NC_003908.1 Western equine encephalomyelitis virus	-
M175_0.6	7	9	1000	7.109	2.65144	0.448384	0.909451	GCF_000850885.1	IV	RBM24	Togaviridae	NC_003908.1 Western equine encephalomyelitis virus	+
M175_0.6	7	13	1000	12.454	3.64104	0.777206	1	GCF_000850885.1	IV	RBM24	Togaviridae	NC_003908.1 Western equine encephalomyelitis virus	-
encode_FUS_1	5	9	1000	16.558	4.33952	0.064091	0.628	GCF_000850885.1	IV	FUS	Togaviridae	NC_003908.1 Western equine encephalomyelitis virus	+
encode_FUS_1	5	27	1000	18.598	4.55183	0.0616989	0.508781	GCF_000850885.1	IV	FUS	Togaviridae	NC_003908.1 Western equine encephalomyelitis virus	-
encode_HNRNPK_1	5	11	1000	11.685	3.35604	1	1	GCF_000850885.1	IV	HNRNPK	Togaviridae	NC_003908.1 Western equine encephalomyelitis virus	+
encode_HNRNPK_1	5	13	1000	10.118	2.99517	0.342443	0.860863	GCF_000850885.1	IV	HNRNPK	Togaviridae	NC_003908.1 Western equine encephalomyelitis virus	-
encode_NOVA1_2	5	27	1000	15.926	3.75668	0.0111977	0.311814	GCF_000850885.1	IV	NOVA1	Togaviridae	NC_003908.1 Western equine encephalomyelitis virus	+
encode_NOVA1_2	5	8	1000	11.725	3.26466	0.377331	0.880204	GCF_000850885.1	IV	NOVA1	Togaviridae	NC_003908.1 Western equine encephalomyelitis virus	-
encode_SNRPA_1	6	30	1000	34.569	5.50705	0.495319	0.931812	GCF_000850885.1	IV	SNRPA	Togaviridae	NC_003908.1 Western equine encephalomyelitis virus	+
encode_SNRPA_1	6	31	1000	24.394	4.71561	0.186041	0.644229	GCF_000850885.1	IV	SNRPA	Togaviridae	NC_003908.1 Western equine encephalomyelitis virus	-
encode_SRSF5_2	5	11	1000	15.671	3.76443	0.30932	0.871589	GCF_000850885.1	IV	SRSF5	Togaviridae	NC_003908.1 Western equine encephalomyelitis virus	+
encode_SRSF5_2	5	10	1000	17.475	4.06545	0.072412	0.524263	GCF_000850885.1	IV	SRSF5	Togaviridae	NC_003908.1 Western equine encephalomyelitis virus	-
s21	6	10	1000	8.938	3.04293	0.616801	0.985171	GCF_000850885.1	IV	ZRANB2	Togaviridae	NC_003908.1 Western equine encephalomyelitis virus	+
s21	6	10	1000	9.035	3.03859	0.736926	1	GCF_000850885.1	IV	ZRANB2	Togaviridae	NC_003908.1 Western equine encephalomyelitis virus	-
M141_0.6	7	3	1000	3.696	1.91291	1	1	GCF_000850885.1	IV	ESRP2	Togaviridae	NC_003908.1 Western equine encephalomyelitis virus	+
M141_0.6	7	2	1000	3.58	1.8754	0.595989	1	GCF_000850885.1	IV	ESRP2	Togaviridae	NC_003908.1 Western equine encephalomyelitis virus	-
1170	4	74	1000	74.89	6.42863	1	1	GCF_000850885.1	IV	ELAVL1	Togaviridae	NC_003908.1 Western equine encephalomyelitis virus	+
1170	4	108	1000	109.854	7.65541	0.923575	1	GCF_000850885.1	IV	ELAVL1	Togaviridae	NC_003908.1 Western equine encephalomyelitis virus	-
41	7	3	1000	2.201	1.61964	0.488229	0.930204	GCF_000850885.1	IV	KHSRP	Togaviridae	NC_003908.1 Western equine encephalomyelitis virus	+
41	7	5	1000	6.109	2.68632	0.839492	1	GCF_000850885.1	IV	KHSRP	Togaviridae	NC_003908.1 Western equine encephalomyelitis virus	-
64	4	356	1000	315.757	12.0018	0.0241228	0.461223	GCF_000850885.1	IV	NOVA1	Togaviridae	NC_003908.1 Western equine encephalomyelitis virus	+
64	4	282	1000	302.501	12.3922	0.243774	0.75424	GCF_000850885.1	IV	NOVA1	Togaviridae	NC_003908.1 Western equine encephalomyelitis virus	-
99	4	107	1000	104.799	8.31924	0.806145	1	GCF_000850885.1	IV	NOVA1	Togaviridae	NC_003908.1 Western equine encephalomyelitis virus	+
99	4	91	1000	114.555	9.22041	0.0271472	0.31701	GCF_000850885.1	IV	NOVA1	Togaviridae	NC_003908.1 Western equine encephalomyelitis virus	-
M054_0.6	7	1	1000	2.47	1.69114	0.529495	0.953258	GCF_000850885.1	IV	RBM8A	Togaviridae	NC_003908.1 Western equine encephalomyelitis virus	+
M054_0.6	7	1	1000	2.728	1.8241	0.535671	0.984329	GCF_000850885.1	IV	RBM8A	Togaviridae	NC_003908.1 Western equine encephalomyelitis virus	-
M075_0.6	7	1	1000	2.656	1.97473	0.532943	0.953258	GCF_000850885.1	IV	TIA1	Togaviridae	NC_003908.1 Western equine encephalomyelitis virus	+
M075_0.6	7	2	1000	5.269	2.84477	0.190723	0.644229	GCF_000850885.1	IV	TIA1	Togaviridae	NC_003908.1 Western equine encephalomyelitis virus	-
M320_0.6a	4	104	1000	80.294	7.9181	0.00991123	0.303901	GCF_000850885.1	IV	MBNL1	Togaviridae	NC_003908.1 Western equine encephalomyelitis virus	+
M320_0.6a	4	113	1000	117.074	9.44414	0.745077	1	GCF_000850885.1	IV	MBNL1	Togaviridae	NC_003908.1 Western equine encephalomyelitis virus	-
encode_FUBP3_1	5	13	1000	14.45	3.98188	0.894695	1	GCF_000850885.1	IV	FUBP3	Togaviridae	NC_003908.1 Western equine encephalomyelitis virus	+
encode_FUBP3_1	5	16	1000	22.309	4.65738	0.203203	0.650969	GCF_000850885.1	IV	FUBP3	Togaviridae	NC_003908.1 Western equine encephalomyelitis virus	-
encode_KHSRP_1	5	26	1000	23.877	4.58245	0.608579	0.985171	GCF_000850885.1	IV	KHSRP	Togaviridae	NC_003908.1 Western equine encephalomyelitis virus	+
encode_KHSRP_1	5	29	1000	43.885	6.435	0.022902	0.28156	GCF_000850885.1	IV	KHSRP	Togaviridae	NC_003908.1 Western equine encephalomyelitis virus	-
encode_SF1_1	5	43	1000	47.781	6.61746	0.561391	0.970661	GCF_000850885.1	IV	SF1	Togaviridae	NC_003908.1 Western equine encephalomyelitis virus	+
encode_SF1_1	5	39	1000	42.357	6.13687	0.699834	1	GCF_000850885.1	IV	SF1	Togaviridae	NC_003908.1 Western equine encephalomyelitis virus	-
encode_SRSF9_1	5	71	1000	51.332	6.66154	0.00940573	0.303901	GCF_000850885.1	IV	SRSF9	Togaviridae	NC_003908.1 Western equine encephalomyelitis virus	+
encode_SRSF9_1	5	29	1000	34.188	5.43932	0.439932	0.939959	GCF_000850885.1	IV	SRSF9	Togaviridae	NC_003908.1 Western equine encephalomyelitis virus	-
s100	7	14	1000	7.514	3.02373	0.0264581	0.478891	GCF_000850885.1	IV	PTBP1	Togaviridae	NC_003908.1 Western equine encephalomyelitis virus	+
s100	7	29	1000	17.718	4.91127	0.0118674	0.214801	GCF_000850885.1	IV	PTBP1	Togaviridae	NC_003908.1 Western equine encephalomyelitis virus	-
s102	7	5	1000	10.662	3.916	0.0901447	0.659455	GCF_000850885.1	IV	RBM4	Togaviridae	NC_003908.1 Western equine encephalomyelitis virus	+
s102	7	9	1000	9.972	3.79415	1	1	GCF_000850885.1	IV	RBM4	Togaviridae	NC_003908.1 Western equine encephalomyelitis virus	-
s30	4	104	1000	80.294	7.9181	0.00991123	0.303901	GCF_000850885.1	IV	MBNL1	Togaviridae	NC_003908.1 Western equine encephalomyelitis virus	+
s30	4	113	1000	117.074	9.44414	0.745077	1	GCF_000850885.1	IV	MBNL1	Togaviridae	NC_003908.1 Western equine encephalomyelitis virus	-
encode_EIF4G2_3	5	11	1000	7.154	2.69212	0.183765	0.712759	GCF_000850885.1	IV	EIF4G2	Togaviridae	NC_003908.1 Western equine encephalomyelitis virus	+
encode_EIF4G2_3	5	15	1000	7.322	2.72098	0.00903694	0.200062	GCF_000850885.1	IV	EIF4G2	Togaviridae	NC_003908.1 Western equine encephalomyelitis virus	-
s31	5	21	1000	29.188	4.888	0.137976	0.686693	GCF_000850885.1	IV	FUS	Togaviridae	NC_003908.1 Western equine encephalomyelitis virus	+
s31	5	52	1000	44.087	6.15136	0.226862	0.707967	GCF_000850885.1	IV	FUS	Togaviridae	NC_003908.1 Western equine encephalomyelitis virus	-
s37	7	2	1000	1.894	1.37428	0.71501	1	GCF_000850885.1	IV	SRSF2	Togaviridae	NC_003908.1 Western equine encephalomyelitis virus	+
s37	7	4	1000	3.178	1.76959	0.566638	1	GCF_000850885.1	IV	SRSF2	Togaviridae	NC_003908.1 Western equine encephalomyelitis virus	-
243	7	2	1000	2.063	1.44191	1	1	GCF_000850885.1	IV	SRSF1	Togaviridae	NC_003908.1 Western equine encephalomyelitis virus	+
243	7	1	1000	1.363	1.16473	1	1	GCF_000850885.1	IV	SRSF1	Togaviridae	NC_003908.1 Western equine encephalomyelitis virus	-
M002_0.6	7	2	1000	4.076	2.01203	0.453957	0.909451	GCF_000850885.1	IV	ANKHD1	Togaviridae	NC_003908.1 Western equine encephalomyelitis virus	+
M002_0.6	7	6	1000	2.464	1.53462	0.0396419	0.42206	GCF_000850885.1	IV	ANKHD1	Togaviridae	NC_003908.1 Western equine encephalomyelitis virus	-
M273_0.6	7	2	1000	2.063	1.44191	1	1	GCF_000850885.1	IV	SRSF1	Togaviridae	NC_003908.1 Western equine encephalomyelitis virus	+
M273_0.6	7	1	1000	1.363	1.16473	1	1	GCF_000850885.1	IV	SRSF1	Togaviridae	NC_003908.1 Western equine encephalomyelitis virus	-
131	5	71	1000	84.083	8.42087	0.170725	0.686693	GCF_000850885.1	IV	HNRNPH1	Togaviridae	NC_003908.1 Western equine encephalomyelitis virus	+
131	5	71	1000	77.38	8.186	0.529969	0.983839	GCF_000850885.1	IV	HNRNPH1	Togaviridae	NC_003908.1 Western equine encephalomyelitis virus	-
142	5	71	1000	84.083	8.42087	0.170725	0.686693	GCF_000850885.1	IV	HNRNPH2	Togaviridae	NC_003908.1 Western equine encephalomyelitis virus	+
142	5	71	1000	77.38	8.186	0.529969	0.983839	GCF_000850885.1	IV	HNRNPH2	Togaviridae	NC_003908.1 Western equine encephalomyelitis virus	-
171	5	71	1000	84.083	8.42087	0.170725	0.686693	GCF_000850885.1	IV	HNRNPF	Togaviridae	NC_003908.1 Western equine encephalomyelitis virus	+
171	5	71	1000	77.38	8.186	0.529969	0.983839	GCF_000850885.1	IV	HNRNPF	Togaviridae	NC_003908.1 Western equine encephalomyelitis virus	-
182	5	71	1000	84.083	8.42087	0.170725	0.686693	GCF_000850885.1	IV	HNRNPH3	Togaviridae	NC_003908.1 Western equine encephalomyelitis virus	+
182	5	71	1000	77.38	8.186	0.529969	0.983839	GCF_000850885.1	IV	HNRNPH3	Togaviridae	NC_003908.1 Western equine encephalomyelitis virus	-
46	5	71	1000	84.083	8.42087	0.170725	0.686693	GCF_000850885.1	IV	GRSF1	Togaviridae	NC_003908.1 Western equine encephalomyelitis virus	+
46	5	71	1000	77.38	8.186	0.529969	0.983839	GCF_000850885.1	IV	GRSF1	Togaviridae	NC_003908.1 Western equine encephalomyelitis virus	-
M047_0.6	7	3	1000	3.72	1.9171	1	1	GCF_000850885.1	IV	RBM28	Togaviridae	NC_003908.1 Western equine encephalomyelitis virus	+
M047_0.6	7	8	1000	4.423	2.112	0.0923292	0.532429	GCF_000850885.1	IV	RBM28	Togaviridae	NC_003908.1 Western equine encephalomyelitis virus	-
M163_0.6	7	11	1000	17.997	4.17617	0.122834	0.68639	GCF_000850885.1	IV	IGF2BP3	Togaviridae	NC_003908.1 Western equine encephalomyelitis virus	+
M163_0.6	7	7	1000	7.861	2.85339	1	1	GCF_000850885.1	IV	IGF2BP3	Togaviridae	NC_003908.1 Western equine encephalomyelitis virus	-
encode_CELF1_1	6	23	1000	21.16	4.64499	0.662421	1	GCF_000850885.1	IV	CELF1	Togaviridae	NC_003908.1 Western equine encephalomyelitis virus	+
encode_CELF1_1	6	31	1000	44.252	6.24464	0.0495455	0.468889	GCF_000850885.1	IV	CELF1	Togaviridae	NC_003908.1 Western equine encephalomyelitis virus	-
encode_DAZ3_2	6	13	1000	11.516	3.29159	0.655939	1	GCF_000850885.1	IV	DAZ3	Togaviridae	NC_003908.1 Western equine encephalomyelitis virus	+
encode_DAZ3_2	6	17	1000	25.405	4.98375	0.110596	0.532429	GCF_000850885.1	IV	DAZ3	Togaviridae	NC_003908.1 Western equine encephalomyelitis virus	-
encode_SFPQ_1	6	10	1000	14.716	3.67326	0.293688	0.850521	GCF_000850885.1	IV	SFPQ	Togaviridae	NC_003908.1 Western equine encephalomyelitis virus	+
encode_SFPQ_1	6	22	1000	17.564	3.99222	0.280731	0.77576	GCF_000850885.1	IV	SFPQ	Togaviridae	NC_003908.1 Western equine encephalomyelitis virus	-
encode_TRA2A_1	7	27	1000	15.334	3.81668	0.00657317	0.297436	GCF_000850885.1	IV	TRA2A	Togaviridae	NC_003908.1 Western equine encephalomyelitis virus	+
encode_TRA2A_1	7	8	1000	7.712	2.82968	0.855927	1	GCF_000850885.1	IV	TRA2A	Togaviridae	NC_003908.1 Western equine encephalomyelitis virus	-
s54	4	145	1000	108.679	9.04576	0.000860511	0.155752	GCF_000850885.1	IV	YBX1	Togaviridae	NC_003908.1 Western equine encephalomyelitis virus	+
s54	4	80	1000	93.838	8.22468	0.161472	0.628525	GCF_000850885.1	IV	YBX1	Togaviridae	NC_003908.1 Western equine encephalomyelitis virus	-
s6	5	80	1000	85.429	7.28121	0.624722	0.985171	GCF_000850885.1	IV	TIAL1	Togaviridae	NC_003908.1 Western equine encephalomyelitis virus	+
s6	5	134	1000	121.992	9.08606	0.274404	0.773159	GCF_000850885.1	IV	TIAL1	Togaviridae	NC_003908.1 Western equine encephalomyelitis virus	-
s86	7	2	1000	1.326	1.182	0.382367	0.87497	GCF_000850885.1	IV	CELF1	Togaviridae	NC_003908.1 Western equine encephalomyelitis virus	+
s86	7	2	1000	4.64	2.25909	0.345634	0.862893	GCF_000850885.1	IV	CELF1	Togaviridae	NC_003908.1 Western equine encephalomyelitis virus	-
s9	5	80	1000	85.429	7.28121	0.624722	0.985171	GCF_000850885.1	IV	TIA1	Togaviridae	NC_003908.1 Western equine encephalomyelitis virus	+
s9	5	134	1000	121.992	9.08606	0.274404	0.773159	GCF_000850885.1	IV	TIA1	Togaviridae	NC_003908.1 Western equine encephalomyelitis virus	-
s97	5	40	1000	28.168	4.9285	0.029786	0.513454	GCF_000850885.1	IV	SRSF9	Togaviridae	NC_003908.1 Western equine encephalomyelitis virus	+
s97	5	8	1000	15.129	3.76464	0.0702795	0.519208	GCF_000850885.1	IV	SRSF9	Togaviridae	NC_003908.1 Western equine encephalomyelitis virus	-
1174	4	103	1000	114.087	8.82651	0.3229	0.872198	GCF_000850885.1	IV	KHDRBS3	Togaviridae	NC_003908.1 Western equine encephalomyelitis virus	+
1174	4	106	1000	103.585	8.46702	0.804961	1	GCF_000850885.1	IV	KHDRBS3	Togaviridae	NC_003908.1 Western equine encephalomyelitis virus	-
167	7	52	1000	66.774	7.97412	0.0746675	0.628	GCF_000850885.1	IV	SRSF1	Togaviridae	NC_003908.1 Western equine encephalomyelitis virus	+
167	7	46	1000	58.173	7.45296	0.11452	0.538391	GCF_000850885.1	IV	SRSF1	Togaviridae	NC_003908.1 Western equine encephalomyelitis virus	-
49	6	8	1000	5.637	2.32393	0.28791	0.842222	GCF_000850885.1	IV	ZFP36	Togaviridae	NC_003908.1 Western equine encephalomyelitis virus	+
49	6	11	1000	11.728	3.37689	1	1	GCF_000850885.1	IV	ZFP36	Togaviridae	NC_003908.1 Western equine encephalomyelitis virus	-
953	9	1	1000	1.346	1.14175	1	1	GCF_000850885.1	IV	SRSF2	Togaviridae	NC_003908.1 Western equine encephalomyelitis virus	+
953	9	0	1000	0.741	0.885835	1	1	GCF_000850885.1	IV	SRSF2	Togaviridae	NC_003908.1 Western equine encephalomyelitis virus	-
M032_0.6	7	12	1000	17.437	4.1513	0.229445	0.769023	GCF_000850885.1	IV	IGF2BP2	Togaviridae	NC_003908.1 Western equine encephalomyelitis virus	+
M032_0.6	7	9	1000	7	2.6414	0.443777	0.939959	GCF_000850885.1	IV	IGF2BP2	Togaviridae	NC_003908.1 Western equine encephalomyelitis virus	-
M155_0.6	7	4	1000	2.909	1.68213	0.545508	0.963287	GCF_000850885.1	IV	ZNF638	Togaviridae	NC_003908.1 Western equine encephalomyelitis virus	+
M155_0.6	7	13	1000	8.154	2.82812	0.109555	0.532429	GCF_000850885.1	IV	ZNF638	Togaviridae	NC_003908.1 Western equine encephalomyelitis virus	-
M162_0.6	7	10	1000	5.769	2.36796	0.090007	0.659455	GCF_000850885.1	IV	PABPC5	Togaviridae	NC_003908.1 Western equine encephalomyelitis virus	+
M162_0.6	7	2	1000	3.371	1.77497	0.780632	1	GCF_000850885.1	IV	PABPC5	Togaviridae	NC_003908.1 Western equine encephalomyelitis virus	-
M332_0.6	10	1	1000	0.173	0.42338	0.158863	0.686693	GCF_000850885.1	IV	SRSF2	Togaviridae	NC_003908.1 Western equine encephalomyelitis virus	+
M332_0.6	10	0	1000	0.28	0.51756	1	1	GCF_000850885.1	IV	SRSF2	Togaviridae	NC_003908.1 Western equine encephalomyelitis virus	-
M352_0.6	9	1	1000	1.346	1.14175	1	1	GCF_000850885.1	IV	SRSF2	Togaviridae	NC_003908.1 Western equine encephalomyelitis virus	+
M352_0.6	9	0	1000	0.741	0.885835	1	1	GCF_000850885.1	IV	SRSF2	Togaviridae	NC_003908.1 Western equine encephalomyelitis virus	-
encode_CPEB1_1	5	23	1000	16.239	4.518	0.10421	0.661824	GCF_000850885.1	IV	CPEB1	Togaviridae	NC_003908.1 Western equine encephalomyelitis virus	+
encode_CPEB1_1	5	31	1000	26.442	6.14853	0.379314	0.880204	GCF_000850885.1	IV	CPEB1	Togaviridae	NC_003908.1 Western equine encephalomyelitis virus	-
encode_DAZ3_1	5	37	1000	38.393	5.57778	0.935448	1	GCF_000850885.1	IV	DAZ3	Togaviridae	NC_003908.1 Western equine encephalomyelitis virus	+
encode_DAZ3_1	5	48	1000	59.15	6.84619	0.170287	0.644229	GCF_000850885.1	IV	DAZ3	Togaviridae	NC_003908.1 Western equine encephalomyelitis virus	-
encode_FUBP1_1	5	29	1000	25.057	4.94147	0.422276	0.909451	GCF_000850885.1	IV	FUBP1	Togaviridae	NC_003908.1 Western equine encephalomyelitis virus	+
encode_FUBP1_1	5	46	1000	47.902	6.7507	0.884692	1	GCF_000850885.1	IV	FUBP1	Togaviridae	NC_003908.1 Western equine encephalomyelitis virus	-
encode_HNRNPCL1_1	5	23	1000	16.239	4.518	0.10421	0.661824	GCF_000850885.1	IV	HNRNPCL1	Togaviridae	NC_003908.1 Western equine encephalomyelitis virus	+
encode_HNRNPCL1_1	5	31	1000	26.442	6.14853	0.379314	0.880204	GCF_000850885.1	IV	HNRNPCL1	Togaviridae	NC_003908.1 Western equine encephalomyelitis virus	-
encode_HNRNPDL_1	5	22	1000	23.754	4.60985	0.836899	1	GCF_000850885.1	IV	HNRNPDL	Togaviridae	NC_003908.1 Western equine encephalomyelitis virus	+
encode_HNRNPDL_1	5	27	1000	25.42	4.85831	0.691454	1	GCF_000850885.1	IV	HNRNPDL	Togaviridae	NC_003908.1 Western equine encephalomyelitis virus	-
encode_HNRNPF_2	5	42	1000	41.544	5.61655	0.937934	1	GCF_000850885.1	IV	HNRNPF	Togaviridae	NC_003908.1 Western equine encephalomyelitis virus	+
encode_HNRNPF_2	5	50	1000	39.846	5.85889	0.111781	0.532429	GCF_000850885.1	IV	HNRNPF	Togaviridae	NC_003908.1 Western equine encephalomyelitis virus	-
encode_PABPN1L_1	5	44	1000	43.769	7.4491	0.939579	1	GCF_000850885.1	IV	PABPN1L	Togaviridae	NC_003908.1 Western equine encephalomyelitis virus	+
encode_PABPN1L_1	5	36	1000	26.63	5.67233	0.0794659	0.532429	GCF_000850885.1	IV	PABPN1L	Togaviridae	NC_003908.1 Western equine encephalomyelitis virus	-
encode_PCBP1_1	5	11	1000	15.89	3.75153	0.25798	0.826177	GCF_000850885.1	IV	PCBP1	Togaviridae	NC_003908.1 Western equine encephalomyelitis virus	+
encode_PCBP1_1	5	8	1000	15.827	3.59889	0.0439435	0.441876	GCF_000850885.1	IV	PCBP1	Togaviridae	NC_003908.1 Western equine encephalomyelitis virus	-
encode_RBM15B_2	5	7	1000	8.693	2.91397	0.733173	1	GCF_000850885.1	IV	RBM15B	Togaviridae	NC_003908.1 Western equine encephalomyelitis virus	+
encode_RBM15B_2	5	8	1000	9.595	3.04734	0.746542	1	GCF_000850885.1	IV	RBM15B	Togaviridae	NC_003908.1 Western equine encephalomyelitis virus	-
encode_RBM24_1	5	12	1000	11.856	3.57128	0.884292	1	GCF_000850885.1	IV	RBM24	Togaviridae	NC_003908.1 Western equine encephalomyelitis virus	+
encode_RBM24_1	5	20	1000	24.503	5.07501	0.418244	0.917602	GCF_000850885.1	IV	RBM24	Togaviridae	NC_003908.1 Western equine encephalomyelitis virus	-
encode_TIA1_1	5	23	1000	16.239	4.518	0.10421	0.661824	GCF_000850885.1	IV	TIA1	Togaviridae	NC_003908.1 Western equine encephalomyelitis virus	+
encode_TIA1_1	5	31	1000	26.442	6.14853	0.379314	0.880204	GCF_000850885.1	IV	TIA1	Togaviridae	NC_003908.1 Western equine encephalomyelitis virus	-
encode_ZNF326_2	5	15	1000	8.939	2.90787	0.0615864	0.628	GCF_000850885.1	IV	ZNF326	Togaviridae	NC_003908.1 Western equine encephalomyelitis virus	+
encode_ZNF326_2	5	9	1000	10.641	3.41112	0.758559	1	GCF_000850885.1	IV	ZNF326	Togaviridae	NC_003908.1 Western equine encephalomyelitis virus	-
s1	5	50	1000	52.27	6.24132	0.835088	1	GCF_000850885.1	IV	ELAVL2	Togaviridae	NC_003908.1 Western equine encephalomyelitis virus	+
s1	5	82	1000	71.646	7.38507	0.213233	0.671219	GCF_000850885.1	IV	ELAVL2	Togaviridae	NC_003908.1 Western equine encephalomyelitis virus	-
s3	7	8	1000	3.729	1.84363	0.0365833	0.557774	GCF_000850885.1	IV	ELAVL2	Togaviridae	NC_003908.1 Western equine encephalomyelitis virus	+
s3	7	11	1000	6.257	2.42958	0.0680082	0.519208	GCF_000850885.1	IV	ELAVL2	Togaviridae	NC_003908.1 Western equine encephalomyelitis virus	-
s35	6	103	1000	95.276	9.34801	0.410442	0.909451	GCF_000850885.1	IV	HNRNPDL	Togaviridae	NC_003908.1 Western equine encephalomyelitis virus	+
s35	6	109	1000	114.693	9.77304	0.638766	1	GCF_000850885.1	IV	HNRNPDL	Togaviridae	NC_003908.1 Western equine encephalomyelitis virus	-
s46	9	1	1000	1.358	1.16154	1	1	GCF_000850885.1	IV	SRSF2	Togaviridae	NC_003908.1 Western equine encephalomyelitis virus	+
s46	9	0	1000	0.726	0.869298	1	1	GCF_000850885.1	IV	SRSF2	Togaviridae	NC_003908.1 Western equine encephalomyelitis virus	-
M077_0.6	7	4	1000	2.506	1.93176	0.325267	0.872198	GCF_000850885.1	IV	U2AF2	Togaviridae	NC_003908.1 Western equine encephalomyelitis virus	+
M077_0.6	7	4	1000	4.842	2.85923	1	1	GCF_000850885.1	IV	U2AF2	Togaviridae	NC_003908.1 Western equine encephalomyelitis virus	-
encode_ZNF326_1	5	34	1000	32.198	5.46687	0.723624	1	GCF_000850885.1	IV	ZNF326	Togaviridae	NC_003908.1 Western equine encephalomyelitis virus	+
encode_ZNF326_1	5	32	1000	27.196	4.97919	0.336489	0.860863	GCF_000850885.1	IV	ZNF326	Togaviridae	NC_003908.1 Western equine encephalomyelitis virus	-
M333_0.6	5	54	1000	47.944	6.48513	0.38431	0.87497	GCF_000850885.1	IV	SRSF9	Togaviridae	NC_003908.1 Western equine encephalomyelitis virus	+
M333_0.6	5	22	1000	25.689	5.07248	0.552616	1	GCF_000850885.1	IV	SRSF9	Togaviridae	NC_003908.1 Western equine encephalomyelitis virus	-
encode_HNRNPA0_2	4	26	1000	34.819	5.49039	0.148453	0.686693	GCF_000850885.1	IV	HNRNPA0	Togaviridae	NC_003908.1 Western equine encephalomyelitis virus	+
encode_HNRNPA0_2	4	40	1000	38.147	5.78972	0.745217	1	GCF_000850885.1	IV	HNRNPA0	Togaviridae	NC_003908.1 Western equine encephalomyelitis virus	-
encode_RBM47_2	5	7	1000	11.432	3.39454	0.234651	0.769023	GCF_000850885.1	IV	RBM47	Togaviridae	NC_003908.1 Western equine encephalomyelitis virus	+
encode_RBM47_2	5	16	1000	15.486	3.96453	0.799775	1	GCF_000850885.1	IV	RBM47	Togaviridae	NC_003908.1 Western equine encephalomyelitis virus	-
M033_0.6	7	5	1000	4.275	2.10471	0.625193	0.985171	GCF_000850885.1	IV	KHDRBS3	Togaviridae	NC_003908.1 Western equine encephalomyelitis virus	+
M033_0.6	7	1	1000	2.513	1.51	0.529801	0.983839	GCF_000850885.1	IV	KHDRBS3	Togaviridae	NC_003908.1 Western equine encephalomyelitis virus	-
M156_0.6	7	4	1000	2.606	1.84937	0.339102	0.87497	GCF_000850885.1	IV	TIA1	Togaviridae	NC_003908.1 Western equine encephalomyelitis virus	+
M156_0.6	7	3	1000	5.213	2.77441	0.505876	0.983839	GCF_000850885.1	IV	TIA1	Togaviridae	NC_003908.1 Western equine encephalomyelitis virus	-
M168_0.6	7	3	1000	4.246	2.07649	0.806015	1	GCF_000850885.1	IV	SFPQ	Togaviridae	NC_003908.1 Western equine encephalomyelitis virus	+
M168_0.6	7	20	1000	8.83	3.00335	0.000985255	0.0881441	GCF_000850885.1	IV	SFPQ	Togaviridae	NC_003908.1 Western equine encephalomyelitis virus	-
M177_0.6	7	10	1000	5.7	2.31633	0.0871652	0.659455	GCF_000850885.1	IV	PCBP1	Togaviridae	NC_003908.1 Western equine encephalomyelitis virus	+
M177_0.6	7	7	1000	6.361	2.58638	0.691051	1	GCF_000850885.1	IV	PCBP1	Togaviridae	NC_003908.1 Western equine encephalomyelitis virus	-
encode_A1CF_1	6	8	1000	11.777	3.42184	0.378136	0.87497	GCF_000850885.1	IV	A1CF	Togaviridae	NC_003908.1 Western equine encephalomyelitis virus	+
encode_A1CF_1	6	5	1000	10.271	3.22862	0.116139	0.539004	GCF_000850885.1	IV	A1CF	Togaviridae	NC_003908.1 Western equine encephalomyelitis virus	-
encode_FUBP1_2	7	5	1000	3.66	1.91522	0.424934	0.909451	GCF_000850885.1	IV	FUBP1	Togaviridae	NC_003908.1 Western equine encephalomyelitis virus	+
encode_FUBP1_2	7	6	1000	6.799	2.5646	1	1	GCF_000850885.1	IV	FUBP1	Togaviridae	NC_003908.1 Western equine encephalomyelitis virus	-
encode_NUPL2_1	7	6	1000	6.671	2.72731	1	1	GCF_000850885.1	IV	NUPL2	Togaviridae	NC_003908.1 Western equine encephalomyelitis virus	+
encode_NUPL2_1	7	10	1000	3.119	1.84831	0.00146171	0.0881441	GCF_000850885.1	IV	NUPL2	Togaviridae	NC_003908.1 Western equine encephalomyelitis virus	-
encode_PUM1_1	5	40	1000	34.256	5.58065	0.30453	0.871589	GCF_000850885.1	IV	PUM1	Togaviridae	NC_003908.1 Western equine encephalomyelitis virus	+
encode_PUM1_1	5	49	1000	48.605	6.5368	0.942615	1	GCF_000850885.1	IV	PUM1	Togaviridae	NC_003908.1 Western equine encephalomyelitis virus	-
encode_RBFOX2_1	5	9	1000	16.042	3.99452	0.0798011	0.628	GCF_000850885.1	IV	RBFOX2	Togaviridae	NC_003908.1 Western equine encephalomyelitis virus	+
encode_RBFOX2_1	5	17	1000	16.45	4.05338	0.805369	1	GCF_000850885.1	IV	RBFOX2	Togaviridae	NC_003908.1 Western equine encephalomyelitis virus	-
encode_RBFOX3_1	5	9	1000	16.042	3.99452	0.0798011	0.628	GCF_000850885.1	IV	RBFOX3	Togaviridae	NC_003908.1 Western equine encephalomyelitis virus	+
encode_RBFOX3_1	5	17	1000	16.45	4.05338	0.805369	1	GCF_000850885.1	IV	RBFOX3	Togaviridae	NC_003908.1 Western equine encephalomyelitis virus	-
encode_RBM41_1	5	24	1000	20.469	4.34441	0.436754	0.909451	GCF_000850885.1	IV	RBM41	Togaviridae	NC_003908.1 Western equine encephalomyelitis virus	+
encode_RBM41_1	5	23	1000	20.929	4.3746	0.584905	1	GCF_000850885.1	IV	RBM41	Togaviridae	NC_003908.1 Western equine encephalomyelitis virus	-
encode_RBM4B_2	6	15	1000	19.466	4.13279	0.363837	0.87497	GCF_000850885.1	IV	RBM4B	Togaviridae	NC_003908.1 Western equine encephalomyelitis virus	+
encode_RBM4B_2	6	17	1000	17.651	4.08386	1	1	GCF_000850885.1	IV	RBM4B	Togaviridae	NC_003908.1 Western equine encephalomyelitis virus	-
encode_SF1_2	5	10	1000	15.69	3.83179	0.164964	0.686693	GCF_000850885.1	IV	SF1	Togaviridae	NC_003908.1 Western equine encephalomyelitis virus	+
encode_SF1_2	5	20	1000	19.422	4.2059	0.820428	1	GCF_000850885.1	IV	SF1	Togaviridae	NC_003908.1 Western equine encephalomyelitis virus	-
encode_TAF15_1	7	4	1000	11.182	3.90668	0.0242078	0.461223	GCF_000850885.1	IV	TAF15	Togaviridae	NC_003908.1 Western equine encephalomyelitis virus	+
encode_TAF15_1	7	5	1000	10.014	3.52906	0.150574	0.607806	GCF_000850885.1	IV	TAF15	Togaviridae	NC_003908.1 Western equine encephalomyelitis virus	-
encode_TRNAU1AP_1	7	7	1000	3.443	1.89429	0.0929066	0.659455	GCF_000850885.1	IV	TRNAU1AP	Togaviridae	NC_003908.1 Western equine encephalomyelitis virus	+
encode_TRNAU1AP_1	7	8	1000	6.319	2.57057	0.425812	0.928578	GCF_000850885.1	IV	TRNAU1AP	Togaviridae	NC_003908.1 Western equine encephalomyelitis virus	-
s52	6	32	1000	24.045	4.69543	0.102443	0.661824	GCF_000850885.1	IV	SRSF2	Togaviridae	NC_003908.1 Western equine encephalomyelitis virus	+
s52	6	11	1000	15.838	3.85962	0.257861	0.772162	GCF_000850885.1	IV	SRSF2	Togaviridae	NC_003908.1 Western equine encephalomyelitis virus	-
947	10	0	1000	0.074	0.261902	1	1	GCF_000850885.1	IV	SNRPA	Togaviridae	NC_003908.1 Western equine encephalomyelitis virus	+
947	10	0	1000	0.089	0.291829	1	1	GCF_000850885.1	IV	SNRPA	Togaviridae	NC_003908.1 Western equine encephalomyelitis virus	-
M346_0.6	10	0	1000	0.074	0.261902	1	1	GCF_000850885.1	IV	SNRPA	Togaviridae	NC_003908.1 Western equine encephalomyelitis virus	+
M346_0.6	10	0	1000	0.089	0.291829	1	1	GCF_000850885.1	IV	SNRPA	Togaviridae	NC_003908.1 Western equine encephalomyelitis virus	-
encode_BOLL_1	7	11	1000	6.422	2.67714	0.0745737	0.628	GCF_000850885.1	IV	BOLL	Togaviridae	NC_003908.1 Western equine encephalomyelitis virus	+
encode_BOLL_1	7	8	1000	13.743	3.84314	0.136571	0.582509	GCF_000850885.1	IV	BOLL	Togaviridae	NC_003908.1 Western equine encephalomyelitis virus	-
M152_0.6	8	3	1000	3.432	1.83596	1	1	GCF_000850885.1	IV	FXR1	Togaviridae	NC_003908.1 Western equine encephalomyelitis virus	+
M152_0.6	8	1	1000	1.585	1.27373	1	1	GCF_000850885.1	IV	FXR1	Togaviridae	NC_003908.1 Western equine encephalomyelitis virus	-
encode_HNRNPK_2	5	19	1000	14.552	3.67462	0.235805	0.769023	GCF_000850885.1	IV	HNRNPK	Togaviridae	NC_003908.1 Western equine encephalomyelitis virus	+
encode_HNRNPK_2	5	8	1000	9.762	3.12492	0.747357	1	GCF_000850885.1	IV	HNRNPK	Togaviridae	NC_003908.1 Western equine encephalomyelitis virus	-
encode_MSI1_2	5	16	1000	24.498	5.03819	0.103961	0.661824	GCF_000850885.1	IV	MSI1	Togaviridae	NC_003908.1 Western equine encephalomyelitis virus	+
encode_MSI1_2	5	17	1000	17.601	3.9331	1	1	GCF_000850885.1	IV	MSI1	Togaviridae	NC_003908.1 Western equine encephalomyelitis virus	-
s42	5	104	1000	73.939	7.63201	0.000855236	0.155752	GCF_000850885.1	IV	SRSF6	Togaviridae	NC_003908.1 Western equine encephalomyelitis virus	+
s42	5	81	1000	78.625	7.99815	0.777046	1	GCF_000850885.1	IV	SRSF6	Togaviridae	NC_003908.1 Western equine encephalomyelitis virus	-
922	4	216	1000	184.175	9.79358	0.0211808	0.451027	GCF_000850885.1	IV	RBMX	Togaviridae	NC_003908.1 Western equine encephalomyelitis virus	+
922	4	147	1000	162.022	9.27931	0.251076	0.763776	GCF_000850885.1	IV	RBMX	Togaviridae	NC_003908.1 Western equine encephalomyelitis virus	-
encode_RBM23_1	5	6	1000	13.394	3.91639	0.0393367	0.557774	GCF_000850885.1	IV	RBM23	Togaviridae	NC_003908.1 Western equine encephalomyelitis virus	+
encode_RBM23_1	5	15	1000	18.17	4.55893	0.556147	1	GCF_000850885.1	IV	RBM23	Togaviridae	NC_003908.1 Western equine encephalomyelitis virus	-
s26	7	84	1000	70.959	8.59146	0.121345	0.68639	GCF_000850885.1	IV	SFPQ	Togaviridae	NC_003908.1 Western equine encephalomyelitis virus	+
s26	7	35	1000	34.609	5.91296	0.932017	1	GCF_000850885.1	IV	SFPQ	Togaviridae	NC_003908.1 Western equine encephalomyelitis virus	-
s58	10	1	1000	0.335	0.573676	0.284665	0.842222	GCF_000850885.1	IV	SRSF2	Togaviridae	NC_003908.1 Western equine encephalomyelitis virus	+
s58	10	0	1000	0.454	0.66658	1	1	GCF_000850885.1	IV	SRSF2	Togaviridae	NC_003908.1 Western equine encephalomyelitis virus	-
encode_UNK_2	6	13	1000	18.947	4.22232	0.204468	0.740172	GCF_000850885.1	IV	UNK	Togaviridae	NC_003908.1 Western equine encephalomyelitis virus	+
encode_UNK_2	6	19	1000	16.351	3.95973	0.458023	0.939959	GCF_000850885.1	IV	UNK	Togaviridae	NC_003908.1 Western equine encephalomyelitis virus	-
s24	8	21	1000	10.845	3.19393	0.00535471	0.276915	GCF_000850885.1	IV	SFPQ	Togaviridae	NC_003908.1 Western equine encephalomyelitis virus	+
s24	8	8	1000	6.932	2.59964	0.570355	1	GCF_000850885.1	IV	SFPQ	Togaviridae	NC_003908.1 Western equine encephalomyelitis virus	-
s41	9	1	1000	1.003	1.00299	1	1	GCF_000850885.1	IV	SRSF3	Togaviridae	NC_003908.1 Western equine encephalomyelitis virus	+
s41	9	3	1000	0.967	0.998453	0.0743249	0.527561	GCF_000850885.1	IV	SRSF3	Togaviridae	NC_003908.1 Western equine encephalomyelitis virus	-
M020_0.6	7	10	1000	9.487	2.89486	0.86986	1	GCF_000850885.1	IV	FXR2	Togaviridae	NC_003908.1 Western equine encephalomyelitis virus	+
M020_0.6	7	5	1000	4.579	2.08377	0.811936	1	GCF_000850885.1	IV	FXR2	Togaviridae	NC_003908.1 Western equine encephalomyelitis virus	-
encode_SRSF8_1	5	25	1000	30.492	5.13793	0.36418	0.87497	GCF_000850885.1	IV	SRSF8	Togaviridae	NC_003908.1 Western equine encephalomyelitis virus	+
encode_SRSF8_1	5	46	1000	28.258	5.11699	0.00178396	0.0881441	GCF_000850885.1	IV	SRSF8	Togaviridae	NC_003908.1 Western equine encephalomyelitis virus	-
1215	8	13	1000	10.397	3.15933	0.433852	0.909451	GCF_000850885.1	IV	QKI	Togaviridae	NC_003908.1 Western equine encephalomyelitis virus	+
1215	8	8	1000	8.093	2.76007	1	1	GCF_000850885.1	IV	QKI	Togaviridae	NC_003908.1 Western equine encephalomyelitis virus	-
M071_0.6	8	2	1000	2.581	1.58239	1	1	GCF_000850885.1	IV	SRSF7	Togaviridae	NC_003908.1 Western equine encephalomyelitis virus	+
M071_0.6	8	2	1000	1.03	1.01495	0.275276	0.773159	GCF_000850885.1	IV	SRSF7	Togaviridae	NC_003908.1 Western equine encephalomyelitis virus	-
M169_0.6	7	8	1000	9.674	3.23515	0.746841	1	GCF_000850885.1	IV	HNRNPLL	Togaviridae	NC_003908.1 Western equine encephalomyelitis virus	+
M169_0.6	7	2	1000	3.245	1.86989	0.778046	1	GCF_000850885.1	IV	HNRNPLL	Togaviridae	NC_003908.1 Western equine encephalomyelitis virus	-
M354_0.6	6	72	1000	65.43	7.97388	0.419678	0.909451	GCF_000850885.1	IV	YTHDC1	Togaviridae	NC_003908.1 Western equine encephalomyelitis virus	+
M354_0.6	6	54	1000	67.295	7.64869	0.111562	0.532429	GCF_000850885.1	IV	YTHDC1	Togaviridae	NC_003908.1 Western equine encephalomyelitis virus	-
encode_RBM22_1	5	10	1000	8.936	2.86533	0.616723	0.985171	GCF_000850885.1	IV	RBM22	Togaviridae	NC_003908.1 Western equine encephalomyelitis virus	+
encode_RBM22_1	5	5	1000	6.399	2.48958	0.841365	1	GCF_000850885.1	IV	RBM22	Togaviridae	NC_003908.1 Western equine encephalomyelitis virus	-
encode_RBM24_3	5	3	1000	7.345	3.28188	0.135836	0.686693	GCF_000850885.1	IV	RBM24	Togaviridae	NC_003908.1 Western equine encephalomyelitis virus	+
encode_RBM24_3	5	2	1000	6.176	2.98629	0.104792	0.532429	GCF_000850885.1	IV	RBM24	Togaviridae	NC_003908.1 Western equine encephalomyelitis virus	-
1343	6	121	1000	101.844	9.46294	0.0585223	0.628	GCF_000850885.1	IV	SRSF5	Togaviridae	NC_003908.1 Western equine encephalomyelitis virus	+
1343	6	98	1000	83.62	8.22309	0.123875	0.565487	GCF_000850885.1	IV	SRSF5	Togaviridae	NC_003908.1 Western equine encephalomyelitis virus	-
encode_MBNL1_3	5	9	1000	10.036	2.99928	0.874844	1	GCF_000850885.1	IV	MBNL1	Togaviridae	NC_003908.1 Western equine encephalomyelitis virus	+
encode_MBNL1_3	5	9	1000	13.213	3.65226	0.332118	0.858762	GCF_000850885.1	IV	MBNL1	Togaviridae	NC_003908.1 Western equine encephalomyelitis virus	-
1285	6	8	1000	4.115	1.97425	0.0745582	0.628	GCF_000850885.1	IV	ZRANB2	Togaviridae	NC_003908.1 Western equine encephalomyelitis virus	+
1285	6	6	1000	3.579	1.92548	0.18086	0.644229	GCF_000850885.1	IV	ZRANB2	Togaviridae	NC_003908.1 Western equine encephalomyelitis virus	-
encode_PTBP3_1	6	4	1000	4.025	1.97034	1	1	GCF_000850885.1	IV	PTBP3	Togaviridae	NC_003908.1 Western equine encephalomyelitis virus	+
encode_PTBP3_1	6	19	1000	8.538	2.78645	0.00155265	0.0881441	GCF_000850885.1	IV	PTBP3	Togaviridae	NC_003908.1 Western equine encephalomyelitis virus	-
M016_0.6	7	9	1000	6.044	2.40205	0.217273	0.761806	GCF_000850885.1	IV	FMR1	Togaviridae	NC_003908.1 Western equine encephalomyelitis virus	+
M016_0.6	7	1	1000	3.336	1.84622	0.275694	0.773159	GCF_000850885.1	IV	FMR1	Togaviridae	NC_003908.1 Western equine encephalomyelitis virus	-
M153_0.6	7	4	1000	3.346	1.7803	0.58286	0.985171	GCF_000850885.1	IV	LIN28A	Togaviridae	NC_003908.1 Western equine encephalomyelitis virus	+
M153_0.6	7	2	1000	2.188	1.45491	1	1	GCF_000850885.1	IV	LIN28A	Togaviridae	NC_003908.1 Western equine encephalomyelitis virus	-
s33	6	7	1000	9.02	2.9991	0.617807	0.985171	GCF_000850885.1	IV	KHDRBS1	Togaviridae	NC_003908.1 Western equine encephalomyelitis virus	+
s33	6	12	1000	9.388	2.94994	0.409679	0.915456	GCF_000850885.1	IV	KHDRBS1	Togaviridae	NC_003908.1 Western equine encephalomyelitis virus	-
encode_KHDRBS3_1	5	17	1000	20.415	4.48474	0.578104	0.985171	GCF_000850885.1	IV	KHDRBS3	Togaviridae	NC_003908.1 Western equine encephalomyelitis virus	+
encode_KHDRBS3_1	5	17	1000	15.761	3.74859	0.704557	1	GCF_000850885.1	IV	KHDRBS3	Togaviridae	NC_003908.1 Western equine encephalomyelitis virus	-
949	7	3	1000	2.538	1.53327	0.745466	1	GCF_000850885.1	IV	SNRPA	Togaviridae	NC_003908.1 Western equine encephalomyelitis virus	+
949	7	0	1000	1.574	1.30776	0.41713	0.917602	GCF_000850885.1	IV	SNRPA	Togaviridae	NC_003908.1 Western equine encephalomyelitis virus	-
M022_0.6	7	2	1000	3.417	1.76188	0.781801	1	GCF_000850885.1	IV	HNRNPA1	Togaviridae	NC_003908.1 Western equine encephalomyelitis virus	+
M022_0.6	7	9	1000	3.016	1.68659	0.00392891	0.129297	GCF_000850885.1	IV	HNRNPA1	Togaviridae	NC_003908.1 Western equine encephalomyelitis virus	-
M031_0.6	7	4	1000	2.736	1.69741	0.358661	0.87497	GCF_000850885.1	IV	ELAVL1	Togaviridae	NC_003908.1 Western equine encephalomyelitis virus	+
M031_0.6	7	4	1000	5.732	2.51087	0.673192	1	GCF_000850885.1	IV	ELAVL1	Togaviridae	NC_003908.1 Western equine encephalomyelitis virus	-
M035_0.6	7	7	1000	4.863	2.14262	0.354656	0.87497	GCF_000850885.1	IV	LIN28A	Togaviridae	NC_003908.1 Western equine encephalomyelitis virus	+
M035_0.6	7	1	1000	2.65	1.53423	0.532749	0.983955	GCF_000850885.1	IV	LIN28A	Togaviridae	NC_003908.1 Western equine encephalomyelitis virus	-
M081_0.6	7	7	1000	5.551	2.28092	0.517896	0.953258	GCF_000850885.1	IV	YBX1	Togaviridae	NC_003908.1 Western equine encephalomyelitis virus	+
M081_0.6	7	1	1000	3.45	1.75744	0.277047	0.773159	GCF_000850885.1	IV	YBX1	Togaviridae	NC_003908.1 Western equine encephalomyelitis virus	-
M086_0.6	7	12	1000	9.681	3.35268	0.418983	0.909451	GCF_000850885.1	IV	SRSF10	Togaviridae	NC_003908.1 Western equine encephalomyelitis virus	+
M086_0.6	7	1	1000	3.839	2.11555	0.19862	0.650969	GCF_000850885.1	IV	SRSF10	Togaviridae	NC_003908.1 Western equine encephalomyelitis virus	-
M102_0.6	6	12	1000	9.268	2.92211	0.323933	0.872198	GCF_000850885.1	IV	SRSF1	Togaviridae	NC_003908.1 Western equine encephalomyelitis virus	+
M102_0.6	6	4	1000	4.88	2.13686	1	1	GCF_000850885.1	IV	SRSF1	Togaviridae	NC_003908.1 Western equine encephalomyelitis virus	-
M103_0.6	6	12	1000	9.268	2.92211	0.323933	0.872198	GCF_000850885.1	IV	SRSF1	Togaviridae	NC_003908.1 Western equine encephalomyelitis virus	+
M103_0.6	6	4	1000	4.88	2.13686	1	1	GCF_000850885.1	IV	SRSF1	Togaviridae	NC_003908.1 Western equine encephalomyelitis virus	-
M298_0.6	6	3	1000	4.372	2.05909	0.807759	1	GCF_000850885.1	IV	RBFOX1	Togaviridae	NC_003908.1 Western equine encephalomyelitis virus	+
M298_0.6	6	7	1000	5.609	2.36426	0.520735	0.983839	GCF_000850885.1	IV	RBFOX1	Togaviridae	NC_003908.1 Western equine encephalomyelitis virus	-
M348_0.6	7	3	1000	2.538	1.53327	0.745466	1	GCF_000850885.1	IV	SNRPA	Togaviridae	NC_003908.1 Western equine encephalomyelitis virus	+
M348_0.6	7	0	1000	1.574	1.30776	0.41713	0.917602	GCF_000850885.1	IV	SNRPA	Togaviridae	NC_003908.1 Western equine encephalomyelitis virus	-
encode_ELAVL4_1	5	22	1000	15.554	4.23828	0.125067	0.68639	GCF_000850885.1	IV	ELAVL4	Togaviridae	NC_003908.1 Western equine encephalomyelitis virus	+
encode_ELAVL4_1	5	21	1000	26.654	5.44499	0.330826	0.858762	GCF_000850885.1	IV	ELAVL4	Togaviridae	NC_003908.1 Western equine encephalomyelitis virus	-
encode_EWSR1_2	5	10	1000	11.966	3.37761	0.77084	1	GCF_000850885.1	IV	EWSR1	Togaviridae	NC_003908.1 Western equine encephalomyelitis virus	+
encode_EWSR1_2	5	18	1000	13.119	3.48439	0.166747	0.642153	GCF_000850885.1	IV	EWSR1	Togaviridae	NC_003908.1 Western equine encephalomyelitis virus	-
encode_FUBP3_2	5	21	1000	15.486	4.10422	0.160247	0.686693	GCF_000850885.1	IV	FUBP3	Togaviridae	NC_003908.1 Western equine encephalomyelitis virus	+
encode_FUBP3_2	5	24	1000	26.494	5.85032	0.697609	1	GCF_000850885.1	IV	FUBP3	Togaviridae	NC_003908.1 Western equine encephalomyelitis virus	-
encode_HNRNPA0_1	5	17	1000	25.69	4.79676	0.092338	0.659455	GCF_000850885.1	IV	HNRNPA0	Togaviridae	NC_003908.1 Western equine encephalomyelitis virus	+
encode_HNRNPA0_1	5	32	1000	24.737	4.84348	0.15701	0.62459	GCF_000850885.1	IV	HNRNPA0	Togaviridae	NC_003908.1 Western equine encephalomyelitis virus	-
encode_HNRNPA2B1_2	5	8	1000	7.272	2.67454	0.708998	1	GCF_000850885.1	IV	HNRNPA2B1	Togaviridae	NC_003908.1 Western equine encephalomyelitis virus	+
encode_HNRNPA2B1_2	5	14	1000	7.211	2.49854	0.0221084	0.28156	GCF_000850885.1	IV	HNRNPA2B1	Togaviridae	NC_003908.1 Western equine encephalomyelitis virus	-
encode_HNRNPDL_2	5	5	1000	6.107	2.49635	0.839486	1	GCF_000850885.1	IV	HNRNPDL	Togaviridae	NC_003908.1 Western equine encephalomyelitis virus	+
encode_HNRNPDL_2	5	3	1000	7.65	2.83081	0.101857	0.532429	GCF_000850885.1	IV	HNRNPDL	Togaviridae	NC_003908.1 Western equine encephalomyelitis virus	-
encode_HNRNPL_1	5	34	1000	43.109	6.29975	0.19358	0.725198	GCF_000850885.1	IV	HNRNPL	Togaviridae	NC_003908.1 Western equine encephalomyelitis virus	+
encode_HNRNPL_1	5	20	1000	19.362	4.63189	0.819934	1	GCF_000850885.1	IV	HNRNPL	Togaviridae	NC_003908.1 Western equine encephalomyelitis virus	-
encode_IGF2BP2_1	7	9	1000	13.33	3.50305	0.273418	0.833457	GCF_000850885.1	IV	IGF2BP2	Togaviridae	NC_003908.1 Western equine encephalomyelitis virus	+
encode_IGF2BP2_1	7	6	1000	5.088	2.27584	0.652307	1	GCF_000850885.1	IV	IGF2BP2	Togaviridae	NC_003908.1 Western equine encephalomyelitis virus	-
encode_ILF2_2	5	8	1000	7.272	2.67454	0.708998	1	GCF_000850885.1	IV	ILF2	Togaviridae	NC_003908.1 Western equine encephalomyelitis virus	+
encode_ILF2_2	5	14	1000	7.211	2.49854	0.0221084	0.28156	GCF_000850885.1	IV	ILF2	Togaviridae	NC_003908.1 Western equine encephalomyelitis virus	-
encode_PRR3_1	5	28	1000	32.636	5.34023	0.482525	0.930188	GCF_000850885.1	IV	PRR3	Togaviridae	NC_003908.1 Western equine encephalomyelitis virus	+
encode_PRR3_1	5	20	1000	21.661	4.39219	0.8295	1	GCF_000850885.1	IV	PRR3	Togaviridae	NC_003908.1 Western equine encephalomyelitis virus	-
encode_PRR3_2	5	24	1000	19.974	4.42978	0.368231	0.87497	GCF_000850885.1	IV	PRR3	Togaviridae	NC_003908.1 Western equine encephalomyelitis virus	+
encode_PRR3_2	5	9	1000	15.545	3.81268	0.12497	0.565487	GCF_000850885.1	IV	PRR3	Togaviridae	NC_003908.1 Western equine encephalomyelitis virus	-
encode_RBM6_2	5	25	1000	12.422	3.51002	0.00145251	0.173991	GCF_000850885.1	IV	RBM6	Togaviridae	NC_003908.1 Western equine encephalomyelitis virus	+
encode_RBM6_2	5	6	1000	9.213	2.94284	0.406012	0.912896	GCF_000850885.1	IV	RBM6	Togaviridae	NC_003908.1 Western equine encephalomyelitis virus	-
encode_RC3H1_2	5	10	1000	9.22	3.02204	0.740233	1	GCF_000850885.1	IV	RC3H1	Togaviridae	NC_003908.1 Western equine encephalomyelitis virus	+
encode_RC3H1_2	5	8	1000	11.889	3.37551	0.309847	0.830849	GCF_000850885.1	IV	RC3H1	Togaviridae	NC_003908.1 Western equine encephalomyelitis virus	-
encode_SRSF11_1	5	57	1000	48.741	6.22822	0.2226	0.767439	GCF_000850885.1	IV	SRSF11	Togaviridae	NC_003908.1 Western equine encephalomyelitis virus	+
encode_SRSF11_1	5	27	1000	28.546	5.12251	0.851438	1	GCF_000850885.1	IV	SRSF11	Togaviridae	NC_003908.1 Western equine encephalomyelitis virus	-
encode_SRSF9_2	5	7	1000	10.938	3.09317	0.288496	0.842222	GCF_000850885.1	IV	SRSF9	Togaviridae	NC_003908.1 Western equine encephalomyelitis virus	+
encode_SRSF9_2	5	5	1000	7.012	2.47588	0.571535	1	GCF_000850885.1	IV	SRSF9	Togaviridae	NC_003908.1 Western equine encephalomyelitis virus	-
encode_TAF15_2	5	8	1000	7.272	2.67454	0.708998	1	GCF_000850885.1	IV	TAF15	Togaviridae	NC_003908.1 Western equine encephalomyelitis virus	+
encode_TAF15_2	5	14	1000	7.211	2.49854	0.0221084	0.28156	GCF_000850885.1	IV	TAF15	Togaviridae	NC_003908.1 Western equine encephalomyelitis virus	-
encode_TARDBP_1	5	39	1000	34.765	5.56028	0.444332	0.909451	GCF_000850885.1	IV	TARDBP	Togaviridae	NC_003908.1 Western equine encephalomyelitis virus	+
encode_TARDBP_1	5	39	1000	49.995	6.91178	0.135866	0.582509	GCF_000850885.1	IV	TARDBP	Togaviridae	NC_003908.1 Western equine encephalomyelitis virus	-
encode_ZFP36_2	5	7	1000	7.291	2.66034	1	1	GCF_000850885.1	IV	ZFP36	Togaviridae	NC_003908.1 Western equine encephalomyelitis virus	+
encode_ZFP36_2	5	6	1000	6.637	2.52935	1	1	GCF_000850885.1	IV	ZFP36	Togaviridae	NC_003908.1 Western equine encephalomyelitis virus	-
s101	7	7	1000	2.334	1.748	0.0100741	0.303901	GCF_000850885.1	IV	ELAVL1	Togaviridae	NC_003908.1 Western equine encephalomyelitis virus	+
s101	7	1	1000	5.558	2.72104	0.0521803	0.472232	GCF_000850885.1	IV	ELAVL1	Togaviridae	NC_003908.1 Western equine encephalomyelitis virus	-
s103	7	6	1000	13.62	4.32878	0.0400611	0.557774	GCF_000850885.1	IV	KHDRBS3	Togaviridae	NC_003908.1 Western equine encephalomyelitis virus	+
s103	7	14	1000	7.1	3.035	0.0209363	0.28156	GCF_000850885.1	IV	KHDRBS3	Togaviridae	NC_003908.1 Western equine encephalomyelitis virus	-
s104	7	12	1000	8.01	3.15656	0.154617	0.686693	GCF_000850885.1	IV	SRSF10	Togaviridae	NC_003908.1 Western equine encephalomyelitis virus	+
s104	7	10	1000	3.246	2.00137	0.00194794	0.0881441	GCF_000850885.1	IV	SRSF10	Togaviridae	NC_003908.1 Western equine encephalomyelitis virus	-
s12	5	18	1000	16.839	4.04839	0.714185	1	GCF_000850885.1	IV	PTBP1	Togaviridae	NC_003908.1 Western equine encephalomyelitis virus	+
s12	5	54	1000	32.662	5.30735	0.000575143	0.0881441	GCF_000850885.1	IV	PTBP1	Togaviridae	NC_003908.1 Western equine encephalomyelitis virus	-
s15	6	41	1000	38.189	5.67393	0.626243	0.985171	GCF_000850885.1	IV	HNRNPK	Togaviridae	NC_003908.1 Western equine encephalomyelitis virus	+
s15	6	27	1000	37.872	5.80149	0.0864886	0.532429	GCF_000850885.1	IV	HNRNPK	Togaviridae	NC_003908.1 Western equine encephalomyelitis virus	-
s19	5	74	1000	66.165	7.59338	0.323666	0.872198	GCF_000850885.1	IV	SRSF5	Togaviridae	NC_003908.1 Western equine encephalomyelitis virus	+
s19	5	51	1000	46.045	6.57786	0.45953	0.939959	GCF_000850885.1	IV	SRSF5	Togaviridae	NC_003908.1 Western equine encephalomyelitis virus	-
s20	6	19	1000	18.478	4.15244	0.816245	1	GCF_000850885.1	IV	ZRANB2	Togaviridae	NC_003908.1 Western equine encephalomyelitis virus	+
s20	6	24	1000	22.853	4.46221	0.753289	1	GCF_000850885.1	IV	ZRANB2	Togaviridae	NC_003908.1 Western equine encephalomyelitis virus	-
s36	7	0	1000	3.884	1.8531	0.0386429	0.557774	GCF_000850885.1	IV	HNRNPDL	Togaviridae	NC_003908.1 Western equine encephalomyelitis virus	+
s36	7	0	1000	2.525	1.50653	0.192201	0.644229	GCF_000850885.1	IV	HNRNPDL	Togaviridae	NC_003908.1 Western equine encephalomyelitis virus	-
s57	10	0	1000	0.126	0.346763	1	1	GCF_000850885.1	IV	SRSF2	Togaviridae	NC_003908.1 Western equine encephalomyelitis virus	+
s57	10	0	1000	0.149	0.372744	1	1	GCF_000850885.1	IV	SRSF2	Togaviridae	NC_003908.1 Western equine encephalomyelitis virus	-
s60	8	3	1000	2.753	1.68191	0.758456	1	GCF_000850885.1	IV	SRSF1	Togaviridae	NC_003908.1 Western equine encephalomyelitis virus	+
s60	8	0	1000	1.272	1.11322	0.643482	1	GCF_000850885.1	IV	SRSF1	Togaviridae	NC_003908.1 Western equine encephalomyelitis virus	-
M108_0.6	7	2	1000	1.443	1.23299	0.659125	1	GCF_000850885.1	IV	ELAVL1	Togaviridae	NC_003908.1 Western equine encephalomyelitis virus	+
M108_0.6	7	2	1000	3.533	1.82215	0.59553	1	GCF_000850885.1	IV	ELAVL1	Togaviridae	NC_003908.1 Western equine encephalomyelitis virus	-
s29	7	1	1000	2.961	1.7171	0.383215	0.87497	GCF_000850885.1	IV	NOVA2	Togaviridae	NC_003908.1 Western equine encephalomyelitis virus	+
s29	7	1	1000	2.106	1.42787	0.73004	1	GCF_000850885.1	IV	NOVA2	Togaviridae	NC_003908.1 Western equine encephalomyelitis virus	-
155	6	69	1000	79.584	8.25221	0.260177	0.826177	GCF_000850885.1	IV	ZFP36	Togaviridae	NC_003908.1 Western equine encephalomyelitis virus	+
155	6	165	1000	130.458	10.3963	0.00315017	0.114036	GCF_000850885.1	IV	ZFP36	Togaviridae	NC_003908.1 Western equine encephalomyelitis virus	-
M104_0.6	7	11	1000	6.759	2.50463	0.117711	0.68639	GCF_000850885.1	IV	SRSF1	Togaviridae	NC_003908.1 Western equine encephalomyelitis virus	+
M104_0.6	7	1	1000	3.346	1.81868	0.275739	0.773159	GCF_000850885.1	IV	SRSF1	Togaviridae	NC_003908.1 Western equine encephalomyelitis virus	-
M157_0.6	7	4	1000	2.618	1.66398	0.340837	0.87497	GCF_000850885.1	IV	CELF5	Togaviridae	NC_003908.1 Western equine encephalomyelitis virus	+
M157_0.6	7	6	1000	8.514	3.11344	0.492714	0.980014	GCF_000850885.1	IV	CELF5	Togaviridae	NC_003908.1 Western equine encephalomyelitis virus	-
encode_TRNAU1AP_2	5	21	1000	18.783	4.31051	0.563091	0.970661	GCF_000850885.1	IV	TRNAU1AP	Togaviridae	NC_003908.1 Western equine encephalomyelitis virus	+
encode_TRNAU1AP_2	5	15	1000	16.463	3.89793	0.901365	1	GCF_000850885.1	IV	TRNAU1AP	Togaviridae	NC_003908.1 Western equine encephalomyelitis virus	-
M051_0.6	7	4	1000	5.547	2.31239	0.671531	1	GCF_000850885.1	IV	RBM41	Togaviridae	NC_003908.1 Western equine encephalomyelitis virus	+
M051_0.6	7	5	1000	5.693	2.3682	1	1	GCF_000850885.1	IV	RBM41	Togaviridae	NC_003908.1 Western equine encephalomyelitis virus	-
M307_0.6	5	16	1000	12.333	3.23923	0.314822	0.872198	GCF_000850885.1	IV	NONO	Togaviridae	NC_003908.1 Western equine encephalomyelitis virus	+
M307_0.6	5	11	1000	6.539	2.54459	0.110755	0.532429	GCF_000850885.1	IV	NONO	Togaviridae	NC_003908.1 Western equine encephalomyelitis virus	-
encode_HNRNPDL_3	5	16	1000	10.768	3.13752	0.123643	0.68639	GCF_000850885.1	IV	HNRNPDL	Togaviridae	NC_003908.1 Western equine encephalomyelitis virus	+
encode_HNRNPDL_3	5	12	1000	7.821	2.58372	0.147112	0.605167	GCF_000850885.1	IV	HNRNPDL	Togaviridae	NC_003908.1 Western equine encephalomyelitis virus	-
encode_PUF60_1	5	21	1000	16.566	4.41057	0.266683	0.832233	GCF_000850885.1	IV	PUF60	Togaviridae	NC_003908.1 Western equine encephalomyelitis virus	+
encode_PUF60_1	5	42	1000	32.318	6.09804	0.0934086	0.532429	GCF_000850885.1	IV	PUF60	Togaviridae	NC_003908.1 Western equine encephalomyelitis virus	-
M021_0.6	7	3	1000	3.763	1.97351	1	1	GCF_000850885.1	IV	G3BP2	Togaviridae	NC_003908.1 Western equine encephalomyelitis virus	+
M021_0.6	7	3	1000	2.185	1.47816	0.48572	0.971441	GCF_000850885.1	IV	G3BP2	Togaviridae	NC_003908.1 Western equine encephalomyelitis virus	-
M176_0.6	7	4	1000	4.282	2.10972	1	1	GCF_000850885.1	IV	KHDRBS2	Togaviridae	NC_003908.1 Western equine encephalomyelitis virus	+
M176_0.6	7	3	1000	2.448	1.53286	0.529237	0.983839	GCF_000850885.1	IV	KHDRBS2	Togaviridae	NC_003908.1 Western equine encephalomyelitis virus	-
M232_0.6	7	0	1000	1.04	1.31001	0.632391	0.985171	GCF_000850885.1	IV	ELAVL1	Togaviridae	NC_003908.1 Western equine encephalomyelitis virus	+
M232_0.6	7	0	1000	2.309	2.00887	0.184124	0.644229	GCF_000850885.1	IV	ELAVL1	Togaviridae	NC_003908.1 Western equine encephalomyelitis virus	-
encode_EIF4G2_2	5	8	1000	11.379	3.34583	0.374748	0.87497	GCF_000850885.1	IV	EIF4G2	Togaviridae	NC_003908.1 Western equine encephalomyelitis virus	+
encode_EIF4G2_2	5	5	1000	8.351	2.77804	0.299889	0.813927	GCF_000850885.1	IV	EIF4G2	Togaviridae	NC_003908.1 Western equine encephalomyelitis virus	-
encode_HNRNPC_1	5	11	1000	8.418	3.44022	0.383363	0.87497	GCF_000850885.1	IV	HNRNPC	Togaviridae	NC_003908.1 Western equine encephalomyelitis virus	+
encode_HNRNPC_1	5	15	1000	15.674	4.88114	1	1	GCF_000850885.1	IV	HNRNPC	Togaviridae	NC_003908.1 Western equine encephalomyelitis virus	-
encode_NUPL2_2	6	21	1000	17.122	3.95661	0.3317	0.87497	GCF_000850885.1	IV	NUPL2	Togaviridae	NC_003908.1 Western equine encephalomyelitis virus	+
encode_NUPL2_2	6	11	1000	11.656	3.13265	1	1	GCF_000850885.1	IV	NUPL2	Togaviridae	NC_003908.1 Western equine encephalomyelitis virus	-
encode_PCBP4_1	5	24	1000	28.922	4.8828	0.402368	0.899119	GCF_000850885.1	IV	PCBP4	Togaviridae	NC_003908.1 Western equine encephalomyelitis virus	+
encode_PCBP4_1	5	40	1000	42.074	5.32474	0.816805	1	GCF_000850885.1	IV	PCBP4	Togaviridae	NC_003908.1 Western equine encephalomyelitis virus	-
encode_RBM6_1	6	15	1000	10.15	3.05923	0.152951	0.686693	GCF_000850885.1	IV	RBM6	Togaviridae	NC_003908.1 Western equine encephalomyelitis virus	+
encode_RBM6_1	6	16	1000	11.566	3.34288	0.183863	0.644229	GCF_000850885.1	IV	RBM6	Togaviridae	NC_003908.1 Western equine encephalomyelitis virus	-
s11	7	6	1000	3.205	1.73781	0.146491	0.686693	GCF_000850885.1	IV	TIA1	Togaviridae	NC_003908.1 Western equine encephalomyelitis virus	+
s11	7	10	1000	6.017	2.25473	0.102126	0.532429	GCF_000850885.1	IV	TIA1	Togaviridae	NC_003908.1 Western equine encephalomyelitis virus	-
s13	5	11	1000	8.418	3.44022	0.383363	0.87497	GCF_000850885.1	IV	HNRNPC	Togaviridae	NC_003908.1 Western equine encephalomyelitis virus	+
s13	5	15	1000	15.674	4.88114	1	1	GCF_000850885.1	IV	HNRNPC	Togaviridae	NC_003908.1 Western equine encephalomyelitis virus	-
s39	7	11	1000	7.694	2.87483	0.206845	0.741365	GCF_000850885.1	IV	SRSF3	Togaviridae	NC_003908.1 Western equine encephalomyelitis virus	+
s39	7	3	1000	4.926	2.26487	0.646562	1	GCF_000850885.1	IV	SRSF3	Togaviridae	NC_003908.1 Western equine encephalomyelitis virus	-
M004_0.6	7	5	1000	3.932	2.14616	0.606066	0.985171	GCF_000850885.1	IV	CELF4	Togaviridae	NC_003908.1 Western equine encephalomyelitis virus	+
M004_0.6	7	6	1000	12.189	3.79917	0.0835425	0.532429	GCF_000850885.1	IV	CELF4	Togaviridae	NC_003908.1 Western equine encephalomyelitis virus	-
M026_0.6	7	4	1000	3.303	1.78616	0.578527	0.985171	GCF_000850885.1	IV	HNRNPK	Togaviridae	NC_003908.1 Western equine encephalomyelitis virus	+
M026_0.6	7	2	1000	2.864	1.72409	1	1	GCF_000850885.1	IV	HNRNPK	Togaviridae	NC_003908.1 Western equine encephalomyelitis virus	-
M044_0.6	7	2	1000	3.749	1.998	0.599437	0.985171	GCF_000850885.1	IV	PPRC1	Togaviridae	NC_003908.1 Western equine encephalomyelitis virus	+
M044_0.6	7	2	1000	3.859	2.0865	0.603086	1	GCF_000850885.1	IV	PPRC1	Togaviridae	NC_003908.1 Western equine encephalomyelitis virus	-
M069_0.6	7	5	1000	6.526	2.45425	0.696238	1	GCF_000850885.1	IV	SNRPA	Togaviridae	NC_003908.1 Western equine encephalomyelitis virus	+
M069_0.6	7	5	1000	4.49	1.97783	0.809952	1	GCF_000850885.1	IV	SNRPA	Togaviridae	NC_003908.1 Western equine encephalomyelitis virus	-
M127_0.6	7	3	1000	3.093	1.76166	1	1	GCF_000850885.1	IV	ELAVL1	Togaviridae	NC_003908.1 Western equine encephalomyelitis virus	+
M127_0.6	7	2	1000	6.196	2.43999	0.104935	0.532429	GCF_000850885.1	IV	ELAVL1	Togaviridae	NC_003908.1 Western equine encephalomyelitis virus	-
encode_ELAVL4_2	5	5	1000	7.819	2.73454	0.469429	0.916477	GCF_000850885.1	IV	ELAVL4	Togaviridae	NC_003908.1 Western equine encephalomyelitis virus	+
encode_ELAVL4_2	5	15	1000	9.844	3.10311	0.107794	0.532429	GCF_000850885.1	IV	ELAVL4	Togaviridae	NC_003908.1 Western equine encephalomyelitis virus	-
s2	6	25	1000	18.748	3.70786	0.163029	0.686693	GCF_000850885.1	IV	ELAVL2	Togaviridae	NC_003908.1 Western equine encephalomyelitis virus	+
s2	6	38	1000	30.623	4.69286	0.174528	0.644229	GCF_000850885.1	IV	ELAVL2	Togaviridae	NC_003908.1 Western equine encephalomyelitis virus	-
1393	7	30	1000	23.794	4.65115	0.216196	0.761806	GCF_000850885.1	IV	SRSF1	Togaviridae	NC_003908.1 Western equine encephalomyelitis virus	+
1393	7	14	1000	16.803	4.05791	0.623846	1	GCF_000850885.1	IV	SRSF1	Togaviridae	NC_003908.1 Western equine encephalomyelitis virus	-
M043_0.6	7	0	1000	2.77	1.72861	0.125143	0.68639	GCF_000850885.1	IV	PCBP2	Togaviridae	NC_003908.1 Western equine encephalomyelitis virus	+
M043_0.6	7	6	1000	4.383	2.23949	0.464321	0.939959	GCF_000850885.1	IV	PCBP2	Togaviridae	NC_003908.1 Western equine encephalomyelitis virus	-
M290_0.6	7	8	1000	6.242	2.45387	0.420736	0.909451	GCF_000850885.1	IV	EIF4B	Togaviridae	NC_003908.1 Western equine encephalomyelitis virus	+
M290_0.6	7	5	1000	5.988	2.35827	1	1	GCF_000850885.1	IV	EIF4B	Togaviridae	NC_003908.1 Western equine encephalomyelitis virus	-
encode_IGF2BP1_1	5	9	1000	14.916	3.74953	0.151867	0.686693	GCF_000850885.1	IV	IGF2BP1	Togaviridae	NC_003908.1 Western equine encephalomyelitis virus	+
encode_IGF2BP1_1	5	9	1000	8.269	2.88287	0.7265	1	GCF_000850885.1	IV	IGF2BP1	Togaviridae	NC_003908.1 Western equine encephalomyelitis virus	-
encode_MSI1_1	7	13	1000	18.385	4.09164	0.24252	0.783859	GCF_000850885.1	IV	MSI1	Togaviridae	NC_003908.1 Western equine encephalomyelitis virus	+
encode_MSI1_1	7	25	1000	20.621	4.20917	0.319942	0.851611	GCF_000850885.1	IV	MSI1	Togaviridae	NC_003908.1 Western equine encephalomyelitis virus	-
s8	7	9	1000	4.863	2.06991	0.0671962	0.628	GCF_000850885.1	IV	TIAL1	Togaviridae	NC_003908.1 Western equine encephalomyelitis virus	+
s8	7	15	1000	8.573	2.70259	0.0379114	0.415877	GCF_000850885.1	IV	TIAL1	Togaviridae	NC_003908.1 Western equine encephalomyelitis virus	-
encode_RC3H1_1	7	5	1000	3.856	1.92014	0.445727	0.909451	GCF_000850885.1	IV	RC3H1	Togaviridae	NC_003908.1 Western equine encephalomyelitis virus	+
encode_RC3H1_1	7	4	1000	4.573	2.05058	1	1	GCF_000850885.1	IV	RC3H1	Togaviridae	NC_003908.1 Western equine encephalomyelitis virus	-
1053	5	8	1000	14.359	3.70214	0.110697	0.679194	GCF_000850885.1	IV	RBMY1A1	Togaviridae	NC_003908.1 Western equine encephalomyelitis virus	+
1053	5	7	1000	13.323	3.62737	0.0975091	0.532429	GCF_000850885.1	IV	RBMY1A1	Togaviridae	NC_003908.1 Western equine encephalomyelitis virus	-
1175	7	5	1000	4.463	2.07483	0.638604	0.987297	GCF_000850885.1	IV	SNRPA	Togaviridae	NC_003908.1 Western equine encephalomyelitis virus	+
1175	7	4	1000	4.446	2.01771	1	1	GCF_000850885.1	IV	SNRPA	Togaviridae	NC_003908.1 Western equine encephalomyelitis virus	-
126	7	21	1000	25.877	5.4186	0.376343	0.87497	GCF_000850885.1	IV	SRSF1	Togaviridae	NC_003908.1 Western equine encephalomyelitis virus	+
126	7	10	1000	15.38	3.82338	0.200704	0.650969	GCF_000850885.1	IV	SRSF1	Togaviridae	NC_003908.1 Western equine encephalomyelitis virus	-
1334	8	11	1000	9.983	3.01792	0.749472	1	GCF_000850885.1	IV	SRSF2	Togaviridae	NC_003908.1 Western equine encephalomyelitis virus	+
1334	8	14	1000	9.344	3.03692	0.136777	0.582509	GCF_000850885.1	IV	SRSF2	Togaviridae	NC_003908.1 Western equine encephalomyelitis virus	-
1384	7	24	1000	21.962	4.40249	0.668037	1	GCF_000850885.1	IV	SRSF6	Togaviridae	NC_003908.1 Western equine encephalomyelitis virus	+
1384	7	24	1000	24.311	4.69066	1	1	GCF_000850885.1	IV	SRSF6	Togaviridae	NC_003908.1 Western equine encephalomyelitis virus	-
169	7	3	1000	2.76	1.67308	0.758919	1	GCF_000850885.1	IV	HNRNPLL	Togaviridae	NC_003908.1 Western equine encephalomyelitis virus	+
169	7	4	1000	1.767	1.36623	0.10345	0.532429	GCF_000850885.1	IV	HNRNPLL	Togaviridae	NC_003908.1 Western equine encephalomyelitis virus	-
175	8	2	1000	1.835	1.28118	0.707105	1	GCF_000850885.1	IV	KHSRP	Togaviridae	NC_003908.1 Western equine encephalomyelitis virus	+
175	8	2	1000	2.733	1.61131	1	1	GCF_000850885.1	IV	KHSRP	Togaviridae	NC_003908.1 Western equine encephalomyelitis virus	-
33	12	1	1000	0.035	0.183872	0.0343946	0.557774	GCF_000850885.1	IV	G3BP1	Togaviridae	NC_003908.1 Western equine encephalomyelitis virus	+
33	12	0	1000	0.011	0.104355	1	1	GCF_000850885.1	IV	G3BP1	Togaviridae	NC_003908.1 Western equine encephalomyelitis virus	-
351	7	14	1000	9.974	3.07844	0.201545	0.736964	GCF_000850885.1	IV	EIF4B	Togaviridae	NC_003908.1 Western equine encephalomyelitis virus	+
351	7	8	1000	6.949	2.64034	0.571297	1	GCF_000850885.1	IV	EIF4B	Togaviridae	NC_003908.1 Western equine encephalomyelitis virus	-
352	4	102	1000	99.732	8.63161	0.801385	1	GCF_000850885.1	IV	EIF4B	Togaviridae	NC_003908.1 Western equine encephalomyelitis virus	+
352	4	76	1000	64.575	7.18373	0.151112	0.607806	GCF_000850885.1	IV	EIF4B	Togaviridae	NC_003908.1 Western equine encephalomyelitis virus	-
72	6	2	1000	3.838	1.88555	0.602309	0.985171	GCF_000850885.1	IV	HNRNPA1	Togaviridae	NC_003908.1 Western equine encephalomyelitis virus	+
72	6	9	1000	3.537	1.83084	0.0105005	0.200062	GCF_000850885.1	IV	HNRNPA1	Togaviridae	NC_003908.1 Western equine encephalomyelitis virus	-
948	11	0	1000	0.087	0.292432	1	1	GCF_000850885.1	IV	SNRPA	Togaviridae	NC_003908.1 Western equine encephalomyelitis virus	+
948	11	0	1000	0.086	0.287553	1	1	GCF_000850885.1	IV	SNRPA	Togaviridae	NC_003908.1 Western equine encephalomyelitis virus	-
M001_0.6	7	2	1000	4.233	2.04521	0.458097	0.911161	GCF_000850885.1	IV	A1CF	Togaviridae	NC_003908.1 Western equine encephalomyelitis virus	+
M001_0.6	7	8	1000	5.017	2.22388	0.174937	0.644229	GCF_000850885.1	IV	A1CF	Togaviridae	NC_003908.1 Western equine encephalomyelitis virus	-
M012_0.6	7	3	1000	2.252	1.60158	0.496366	0.931812	GCF_000850885.1	IV	CPEB2	Togaviridae	NC_003908.1 Western equine encephalomyelitis virus	+
M012_0.6	7	2	1000	4.203	2.25097	0.457112	0.939959	GCF_000850885.1	IV	CPEB2	Togaviridae	NC_003908.1 Western equine encephalomyelitis virus	-
M013_0.6	7	1	1000	2.454	1.61322	0.529461	0.953258	GCF_000850885.1	IV	DAZAP1	Togaviridae	NC_003908.1 Western equine encephalomyelitis virus	+
M013_0.6	7	3	1000	2.584	1.62283	0.748018	1	GCF_000850885.1	IV	DAZAP1	Togaviridae	NC_003908.1 Western equine encephalomyelitis virus	-
M019_0.6	7	7	1000	6.546	2.62312	0.843058	1	GCF_000850885.1	IV	SRSF10	Togaviridae	NC_003908.1 Western equine encephalomyelitis virus	+
M019_0.6	7	4	1000	2.304	1.55177	0.301288	0.813927	GCF_000850885.1	IV	SRSF10	Togaviridae	NC_003908.1 Western equine encephalomyelitis virus	-
M023_0.6	7	2	1000	2.891	1.65041	1	1	GCF_000850885.1	IV	HNRNPA1L2	Togaviridae	NC_003908.1 Western equine encephalomyelitis virus	+
M023_0.6	7	8	1000	2.681	1.57217	0.00635332	0.166816	GCF_000850885.1	IV	HNRNPA1L2	Togaviridae	NC_003908.1 Western equine encephalomyelitis virus	-
M024_0.6	6	2	1000	3.838	1.88555	0.602309	0.985171	GCF_000850885.1	IV	HNRNPA2B1	Togaviridae	NC_003908.1 Western equine encephalomyelitis virus	+
M024_0.6	6	9	1000	3.537	1.83084	0.0105005	0.200062	GCF_000850885.1	IV	HNRNPA2B1	Togaviridae	NC_003908.1 Western equine encephalomyelitis virus	-
M025_0.6	7	4	1000	2.71	1.87814	0.354622	0.87497	GCF_000850885.1	IV	HNRNPC	Togaviridae	NC_003908.1 Western equine encephalomyelitis virus	+
M025_0.6	7	3	1000	4.878	2.61839	0.645151	1	GCF_000850885.1	IV	HNRNPC	Togaviridae	NC_003908.1 Western equine encephalomyelitis virus	-
M027_0.6	7	4	1000	9.681	3.29486	0.0743066	0.628	GCF_000850885.1	IV	HNRNPL	Togaviridae	NC_003908.1 Western equine encephalomyelitis virus	+
M027_0.6	7	2	1000	3.166	1.89474	0.77692	1	GCF_000850885.1	IV	HNRNPL	Togaviridae	NC_003908.1 Western equine encephalomyelitis virus	-
M036_0.6	7	1	1000	2.76	1.64776	0.537111	0.953258	GCF_000850885.1	IV	MATR3	Togaviridae	NC_003908.1 Western equine encephalomyelitis virus	+
M036_0.6	7	3	1000	3.377	1.79055	1	1	GCF_000850885.1	IV	MATR3	Togaviridae	NC_003908.1 Western equine encephalomyelitis virus	-
M037_0.6	6	4	1000	3.029	1.71788	0.554085	0.96898	GCF_000850885.1	IV	MBNL1	Togaviridae	NC_003908.1 Western equine encephalomyelitis virus	+
M037_0.6	6	2	1000	4.379	2.04879	0.341326	0.860863	GCF_000850885.1	IV	MBNL1	Togaviridae	NC_003908.1 Western equine encephalomyelitis virus	-
M040_0.6	7	0	1000	1.837	1.33799	0.273982	0.833457	GCF_000850885.1	IV	MSI1	Togaviridae	NC_003908.1 Western equine encephalomyelitis virus	+
M040_0.6	7	3	1000	2.311	1.46507	0.506023	0.983839	GCF_000850885.1	IV	MSI1	Togaviridae	NC_003908.1 Western equine encephalomyelitis virus	-
M046_0.6	7	2	1000	3.178	1.76619	0.777065	1	GCF_000850885.1	IV	QKI	Togaviridae	NC_003908.1 Western equine encephalomyelitis virus	+
M046_0.6	7	2	1000	1.895	1.36155	0.715144	1	GCF_000850885.1	IV	QKI	Togaviridae	NC_003908.1 Western equine encephalomyelitis virus	-
M050_0.6	7	2	1000	1.772	1.38922	0.698768	1	GCF_000850885.1	IV	RBM14	Togaviridae	NC_003908.1 Western equine encephalomyelitis virus	+
M050_0.6	7	2	1000	1.883	1.4175	0.713531	1	GCF_000850885.1	IV	RBM14	Togaviridae	NC_003908.1 Western equine encephalomyelitis virus	-
M052_0.6	7	4	1000	10.274	3.21672	0.0578557	0.628	GCF_000850885.1	IV	RBM46	Togaviridae	NC_003908.1 Western equine encephalomyelitis virus	+
M052_0.6	7	3	1000	7.615	2.71074	0.101731	0.532429	GCF_000850885.1	IV	RBM46	Togaviridae	NC_003908.1 Western equine encephalomyelitis virus	-
M061_0.6	7	5	1000	5.63	2.36489	1	1	GCF_000850885.1	IV	SAMD4A	Togaviridae	NC_003908.1 Western equine encephalomyelitis virus	+
M061_0.6	7	3	1000	5.776	2.47304	0.398028	0.911938	GCF_000850885.1	IV	SAMD4A	Togaviridae	NC_003908.1 Western equine encephalomyelitis virus	-
M068_0.6	7	7	1000	5.68	2.36118	0.524489	0.953258	GCF_000850885.1	IV	SNRNP70	Togaviridae	NC_003908.1 Western equine encephalomyelitis virus	+
M068_0.6	7	4	1000	4.684	2.12006	1	1	GCF_000850885.1	IV	SNRNP70	Togaviridae	NC_003908.1 Western equine encephalomyelitis virus	-
M070_0.6	8	5	1000	4.682	2.12589	0.814555	1	GCF_000850885.1	IV	SRSF2	Togaviridae	NC_003908.1 Western equine encephalomyelitis virus	+
M070_0.6	8	0	1000	2.498	1.537	0.19076	0.644229	GCF_000850885.1	IV	SRSF2	Togaviridae	NC_003908.1 Western equine encephalomyelitis virus	-
M072_0.6	7	7	1000	6.772	2.65048	0.846528	1	GCF_000850885.1	IV	SRSF9	Togaviridae	NC_003908.1 Western equine encephalomyelitis virus	+
M072_0.6	7	5	1000	3.108	1.77073	0.247849	0.760352	GCF_000850885.1	IV	SRSF9	Togaviridae	NC_003908.1 Western equine encephalomyelitis virus	-
M074_0.6	6	8	1000	10.451	3.0648	0.537195	0.953258	GCF_000850885.1	IV	TARDBP	Togaviridae	NC_003908.1 Western equine encephalomyelitis virus	+
M074_0.6	6	7	1000	9.351	3.01345	0.620633	1	GCF_000850885.1	IV	TARDBP	Togaviridae	NC_003908.1 Western equine encephalomyelitis virus	-
M082_0.6	6	9	1000	9.996	3.15816	1	1	GCF_000850885.1	IV	YBX2	Togaviridae	NC_003908.1 Western equine encephalomyelitis virus	+
M082_0.6	6	1	1000	4.949	2.19983	0.106925	0.532429	GCF_000850885.1	IV	YBX2	Togaviridae	NC_003908.1 Western equine encephalomyelitis virus	-
M087_0.6	7	11	1000	7.199	2.76207	0.185081	0.712759	GCF_000850885.1	IV	SRSF10	Togaviridae	NC_003908.1 Western equine encephalomyelitis virus	+
M087_0.6	7	7	1000	2.682	1.69757	0.019912	0.28156	GCF_000850885.1	IV	SRSF10	Togaviridae	NC_003908.1 Western equine encephalomyelitis virus	-
M088_0.6	7	8	1000	7.616	2.84687	0.854723	1	GCF_000850885.1	IV	SRSF10	Togaviridae	NC_003908.1 Western equine encephalomyelitis virus	+
M088_0.6	7	5	1000	2.744	1.73247	0.207977	0.660419	GCF_000850885.1	IV	SRSF10	Togaviridae	NC_003908.1 Western equine encephalomyelitis virus	-
M089_0.6	7	6	1000	12.87	3.45529	0.0505945	0.610507	GCF_000850885.1	IV	HNRNPL	Togaviridae	NC_003908.1 Western equine encephalomyelitis virus	+
M089_0.6	7	1	1000	4.698	2.14462	0.102009	0.532429	GCF_000850885.1	IV	HNRNPL	Togaviridae	NC_003908.1 Western equine encephalomyelitis virus	-
M106_0.6	7	11	1000	8.952	2.86878	0.499369	0.931812	GCF_000850885.1	IV	SRSF1	Togaviridae	NC_003908.1 Western equine encephalomyelitis virus	+
M106_0.6	7	4	1000	3.784	1.85494	0.794706	1	GCF_000850885.1	IV	SRSF1	Togaviridae	NC_003908.1 Western equine encephalomyelitis virus	-
M109_0.6	7	1	1000	1.294	1.20541	1	1	GCF_000850885.1	IV	RBM14	Togaviridae	NC_003908.1 Western equine encephalomyelitis virus	+
M109_0.6	7	1	1000	1.187	1.09601	1	1	GCF_000850885.1	IV	RBM14	Togaviridae	NC_003908.1 Western equine encephalomyelitis virus	-
M111_0.6	7	9	1000	6.176	2.45827	0.225921	0.769023	GCF_000850885.1	IV	YBX1	Togaviridae	NC_003908.1 Western equine encephalomyelitis virus	+
M111_0.6	7	0	1000	3.408	1.75973	0.0564252	0.498194	GCF_000850885.1	IV	YBX1	Togaviridae	NC_003908.1 Western equine encephalomyelitis virus	-
M140_0.6	7	8	1000	9.42	3.11758	0.869441	1	GCF_000850885.1	IV	ENOX1	Togaviridae	NC_003908.1 Western equine encephalomyelitis virus	+
M140_0.6	7	3	1000	4.267	2.01687	0.80626	1	GCF_000850885.1	IV	ENOX1	Togaviridae	NC_003908.1 Western equine encephalomyelitis virus	-
M142_0.6	7	1	1000	2.189	1.49784	0.731572	1	GCF_000850885.1	IV	RBM42	Togaviridae	NC_003908.1 Western equine encephalomyelitis virus	+
M142_0.6	7	1	1000	1.457	1.16684	1	1	GCF_000850885.1	IV	RBM42	Togaviridae	NC_003908.1 Western equine encephalomyelitis virus	-
M144_0.6	7	3	1000	4.684	2.01797	0.640925	0.987297	GCF_000850885.1	IV	PABPC3	Togaviridae	NC_003908.1 Western equine encephalomyelitis virus	+
M144_0.6	7	3	1000	1.988	1.37759	0.457021	0.939959	GCF_000850885.1	IV	PABPC3	Togaviridae	NC_003908.1 Western equine encephalomyelitis virus	-
M147_0.6	6	13	1000	19.887	4.38034	0.142986	0.686693	GCF_000850885.1	IV	CNOT4	Togaviridae	NC_003908.1 Western equine encephalomyelitis virus	+
M147_0.6	6	10	1000	7.565	2.75124	0.358334	0.880204	GCF_000850885.1	IV	CNOT4	Togaviridae	NC_003908.1 Western equine encephalomyelitis virus	-
M148_0.6	6	23	1000	13.519	3.75336	0.0191906	0.451027	GCF_000850885.1	IV	PABPN1	Togaviridae	NC_003908.1 Western equine encephalomyelitis virus	+
M148_0.6	6	9	1000	5.703	2.495	0.200167	0.650969	GCF_000850885.1	IV	PABPN1	Togaviridae	NC_003908.1 Western equine encephalomyelitis virus	-
M149_0.6	7	1	1000	2.015	1.76462	0.729321	1	GCF_000850885.1	IV	CPEB4	Togaviridae	NC_003908.1 Western equine encephalomyelitis virus	+
M149_0.6	7	0	1000	4.086	2.68436	0.0408069	0.42206	GCF_000850885.1	IV	CPEB4	Togaviridae	NC_003908.1 Western equine encephalomyelitis virus	-
M150_0.6	7	0	1000	1.545	1.58824	0.415813	0.909451	GCF_000850885.1	IV	RALY	Togaviridae	NC_003908.1 Western equine encephalomyelitis virus	+
M150_0.6	7	0	1000	3.343	2.41934	0.0891477	0.532429	GCF_000850885.1	IV	RALY	Togaviridae	NC_003908.1 Western equine encephalomyelitis virus	-
M154_0.6	7	6	1000	3.074	1.77417	0.137751	0.686693	GCF_000850885.1	IV	SRSF1	Togaviridae	NC_003908.1 Western equine encephalomyelitis virus	+
M154_0.6	7	1	1000	1.499	1.22045	1	1	GCF_000850885.1	IV	SRSF1	Togaviridae	NC_003908.1 Western equine encephalomyelitis virus	-
M158_0.6	7	4	1000	2.71	1.87814	0.354622	0.87497	GCF_000850885.1	IV	HNRNPCL1	Togaviridae	NC_003908.1 Western equine encephalomyelitis virus	+
M158_0.6	7	3	1000	4.878	2.61839	0.645151	1	GCF_000850885.1	IV	HNRNPCL1	Togaviridae	NC_003908.1 Western equine encephalomyelitis virus	-
M159_0.6	7	5	1000	6.871	2.60137	0.699479	1	GCF_000850885.1	IV	RBFOX1	Togaviridae	NC_003908.1 Western equine encephalomyelitis virus	+
M159_0.6	7	10	1000	7.431	2.71194	0.352785	0.874713	GCF_000850885.1	IV	RBFOX1	Togaviridae	NC_003908.1 Western equine encephalomyelitis virus	-
M160_0.6	7	4	1000	2.949	1.6514	0.5482	0.963341	GCF_000850885.1	IV	KHDRBS1	Togaviridae	NC_003908.1 Western equine encephalomyelitis virus	+
M160_0.6	7	6	1000	1.664	1.28637	0.00724326	0.174804	GCF_000850885.1	IV	KHDRBS1	Togaviridae	NC_003908.1 Western equine encephalomyelitis virus	-
M161_0.6	7	5	1000	4.273	2.00861	0.625061	0.985171	GCF_000850885.1	IV	RBM6	Togaviridae	NC_003908.1 Western equine encephalomyelitis virus	+
M161_0.6	7	6	1000	3.559	1.84877	0.178703	0.644229	GCF_000850885.1	IV	RBM6	Togaviridae	NC_003908.1 Western equine encephalomyelitis virus	-
M164_0.6	6	2	1000	5.715	2.40948	0.141563	0.686693	GCF_000850885.1	IV	RBMS3	Togaviridae	NC_003908.1 Western equine encephalomyelitis virus	+
M164_0.6	6	3	1000	4.61	2.22999	0.639979	1	GCF_000850885.1	IV	RBMS3	Togaviridae	NC_003908.1 Western equine encephalomyelitis virus	-
M167_0.6	7	1	1000	2.912	1.70387	0.382796	0.87497	GCF_000850885.1	IV	MSI1	Togaviridae	NC_003908.1 Western equine encephalomyelitis virus	+
M167_0.6	7	4	1000	3.145	1.71491	0.563694	1	GCF_000850885.1	IV	MSI1	Togaviridae	NC_003908.1 Western equine encephalomyelitis virus	-
M178_0.6	7	7	1000	4.552	2.09277	0.23415	0.769023	GCF_000850885.1	IV	CELF6	Togaviridae	NC_003908.1 Western equine encephalomyelitis virus	+
M178_0.6	7	10	1000	9.619	3.04288	0.870851	1	GCF_000850885.1	IV	CELF6	Togaviridae	NC_003908.1 Western equine encephalomyelitis virus	-
M227_0.6	7	5	1000	2.956	1.6991	0.229383	0.769023	GCF_000850885.1	IV	PTBP1	Togaviridae	NC_003908.1 Western equine encephalomyelitis virus	+
M227_0.6	7	11	1000	6.075	2.48063	0.0620027	0.508781	GCF_000850885.1	IV	PTBP1	Togaviridae	NC_003908.1 Western equine encephalomyelitis virus	-
M246_0.6	5	24	1000	38.877	5.73348	0.0155416	0.401861	GCF_000850885.1	IV	RBMY1A1	Togaviridae	NC_003908.1 Western equine encephalomyelitis virus	+
M246_0.6	5	19	1000	25.175	4.80827	0.270716	0.773159	GCF_000850885.1	IV	RBMY1A1	Togaviridae	NC_003908.1 Western equine encephalomyelitis virus	-
M256_0.6	6	9	1000	12.525	3.37887	0.39527	0.888743	GCF_000850885.1	IV	ACO1	Togaviridae	NC_003908.1 Western equine encephalomyelitis virus	+
M256_0.6	6	23	1000	14.13	3.59528	0.0233337	0.28156	GCF_000850885.1	IV	ACO1	Togaviridae	NC_003908.1 Western equine encephalomyelitis virus	-
M271_0.6	6	2	1000	3.838	1.88555	0.602309	0.985171	GCF_000850885.1	IV	HNRNPA1	Togaviridae	NC_003908.1 Western equine encephalomyelitis virus	+
M271_0.6	6	9	1000	3.537	1.83084	0.0105005	0.200062	GCF_000850885.1	IV	HNRNPA1	Togaviridae	NC_003908.1 Western equine encephalomyelitis virus	-
M272_0.6	8	3	1000	2.168	1.44979	0.483081	0.930188	GCF_000850885.1	IV	SRSF1	Togaviridae	NC_003908.1 Western equine encephalomyelitis virus	+
M272_0.6	8	1	1000	0.913	0.964552	0.598696	1	GCF_000850885.1	IV	SRSF1	Togaviridae	NC_003908.1 Western equine encephalomyelitis virus	-
M320_0.6	8	2	1000	4.44	2.18842	0.341687	0.87497	GCF_000850885.1	IV	MBNL1	Togaviridae	NC_003908.1 Western equine encephalomyelitis virus	+
M320_0.6	8	16	1000	9.619	3.04748	0.0502847	0.468889	GCF_000850885.1	IV	MBNL1	Togaviridae	NC_003908.1 Western equine encephalomyelitis virus	-
M347_0.6	11	0	1000	0.087	0.292432	1	1	GCF_000850885.1	IV	SNRPA	Togaviridae	NC_003908.1 Western equine encephalomyelitis virus	+
M347_0.6	11	0	1000	0.086	0.287553	1	1	GCF_000850885.1	IV	SNRPA	Togaviridae	NC_003908.1 Western equine encephalomyelitis virus	-
M349_0.6	7	13	1000	14.215	3.64583	0.89412	1	GCF_000850885.1	IV	PABPC1	Togaviridae	NC_003908.1 Western equine encephalomyelitis virus	+
M349_0.6	7	2	1000	7.243	2.68387	0.0585513	0.504656	GCF_000850885.1	IV	PABPC1	Togaviridae	NC_003908.1 Western equine encephalomyelitis virus	-
encode_BOLL_2	6	8	1000	9.094	3.0037	0.868257	1	GCF_000850885.1	IV	BOLL	Togaviridae	NC_003908.1 Western equine encephalomyelitis virus	+
encode_BOLL_2	6	14	1000	14.497	3.71588	1	1	GCF_000850885.1	IV	BOLL	Togaviridae	NC_003908.1 Western equine encephalomyelitis virus	-
encode_CNOT4_1	6	27	1000	34.078	5.82253	0.263715	0.83013	GCF_000850885.1	IV	CNOT4	Togaviridae	NC_003908.1 Western equine encephalomyelitis virus	+
encode_CNOT4_1	6	15	1000	13.278	3.71059	0.581905	1	GCF_000850885.1	IV	CNOT4	Togaviridae	NC_003908.1 Western equine encephalomyelitis virus	-
encode_DAZ3_3	6	11	1000	7.446	2.73103	0.194321	0.725198	GCF_000850885.1	IV	DAZ3	Togaviridae	NC_003908.1 Western equine encephalomyelitis virus	+
encode_DAZ3_3	6	9	1000	12.768	3.55427	0.397679	0.911938	GCF_000850885.1	IV	DAZ3	Togaviridae	NC_003908.1 Western equine encephalomyelitis virus	-
encode_DAZAP1_1	6	3	1000	7.65	2.83081	0.101857	0.661824	GCF_000850885.1	IV	DAZAP1	Togaviridae	NC_003908.1 Western equine encephalomyelitis virus	+
encode_DAZAP1_1	6	5	1000	6.107	2.49635	0.839486	1	GCF_000850885.1	IV	DAZAP1	Togaviridae	NC_003908.1 Western equine encephalomyelitis virus	-
encode_EIF4G2_1	6	10	1000	13.042	3.64411	0.487968	0.930204	GCF_000850885.1	IV	EIF4G2	Togaviridae	NC_003908.1 Western equine encephalomyelitis virus	+
encode_EIF4G2_1	6	18	1000	20.597	4.39339	0.658904	1	GCF_000850885.1	IV	EIF4G2	Togaviridae	NC_003908.1 Western equine encephalomyelitis virus	-
encode_FUBP3_3	5	5	1000	7.765	2.79779	0.468259	0.916477	GCF_000850885.1	IV	FUBP3	Togaviridae	NC_003908.1 Western equine encephalomyelitis virus	+
encode_FUBP3_3	5	8	1000	9.879	3.16866	0.748334	1	GCF_000850885.1	IV	FUBP3	Togaviridae	NC_003908.1 Western equine encephalomyelitis virus	-
encode_HNRNPA2B1_1	5	6	1000	16.685	4.62181	0.00460873	0.276915	GCF_000850885.1	IV	HNRNPA2B1	Togaviridae	NC_003908.1 Western equine encephalomyelitis virus	+
encode_HNRNPA2B1_1	5	6	1000	12.67	4.15046	0.0655783	0.516072	GCF_000850885.1	IV	HNRNPA2B1	Togaviridae	NC_003908.1 Western equine encephalomyelitis virus	-
encode_HNRNPD_1	5	6	1000	6.637	2.52935	1	1	GCF_000850885.1	IV	HNRNPD	Togaviridae	NC_003908.1 Western equine encephalomyelitis virus	+
[truncated: 140,623 more rows]
