# Supplementary material for: Investigating the Human Host—ssRNA Virus Interaction Landscape Using the SMEAGOL Toolbox
Source: Viruses. 2022 Jun 29;14(7):1436. doi: 10.3390/v14071436 (PMC9317827; doi:10.3390/v14071436)
Supplement: Supplementary file 1 [file viruses-14-01436-s001.zip › Supp_Data_S4_gpIV_utr_enrichment.xlsx]

## Sheet: Supp_Data_3_gpIV_utr_enrichment
Matrix ID	Matrix Width	sense	Real sites	Number of background sequences	Average number of sites in background sequences	S.D. of number of sites in background sequences	Adjusted UTR length (length - matrix width + 1)	p	fdr	name	region	id	RBP	Gene_id
1174	4	+	1	1000	0.993	0.653742	20	1	1	GCF_000850885.1_ViralProj14831_genomic.gff:NC_003908.1	five_prime_UTR	NC_003908.1	KHDRBS3	ENSG00000131773
1174	4	+	11	1000	7.551	1.92122	297	0.194423	1	GCF_000850885.1_ViralProj14831_genomic.gff:NC_003908.1	three_prime_UTR	NC_003908.1	KHDRBS3	ENSG00000131773
1174	4	+	4	1000	6.143	2.00064	804	0.540791	1	GCF_000853805.1_ViralProj14948_genomic.gff:NC_004421.1	five_prime_UTR	NC_004421.1	KHDRBS3	ENSG00000131773
1174	4	+	0	1000	0.885	0.802757	170	1	1	GCF_000853805.1_ViralProj14948_genomic.gff:NC_004421.1	three_prime_UTR	NC_004421.1	KHDRBS3	ENSG00000131773
1174	4	+	6	1000	6.657	1.78003	282	1	1	GCF_000853865.1_ViralProj14960_genomic.gff:NC_005831.2	five_prime_UTR	NC_005831.2	KHDRBS3	ENSG00000131773
1174	4	+	7	1000	6.473	1.8195	283	0.840563	1	GCF_000853865.1_ViralProj14960_genomic.gff:NC_005831.2	three_prime_UTR	NC_005831.2	KHDRBS3	ENSG00000131773
1174	4	+	0	1000	0.313	0.497271	126	1	1	GCF_000860805.1_ViralProj15370_genomic.gff:NC_003690.1	five_prime_UTR	NC_003690.1	KHDRBS3	ENSG00000131773
1174	4	+	1	1000	2.462	1.28538	564	0.528596	1	GCF_000860805.1_ViralProj15370_genomic.gff:NC_003690.1	three_prime_UTR	NC_003690.1	KHDRBS3	ENSG00000131773
1174	4	+	2	1000	0.924	0.791739	92	0.236166	1	GCF_000861085.1_ViralProj15431_genomic.gff:NC_001563.2	five_prime_UTR	NC_001563.2	KHDRBS3	ENSG00000131773
1174	4	+	7	1000	5.375	1.88625	569	0.389333	1	GCF_000861085.1_ViralProj15431_genomic.gff:NC_001563.2	three_prime_UTR	NC_001563.2	KHDRBS3	ENSG00000131773
1174	4	+	6	1000	8.757	2.35616	738	0.492959	1	GCF_000861165.1_ViralProj15288_genomic.gff:NC_002058.3	five_prime_UTR	NC_002058.3	KHDRBS3	ENSG00000131773
1174	4	+	7	1000	8.279	2.27779	1063	0.860555	1	GCF_000861185.1_ViralProj15292_genomic.gff:NC_001366.1	five_prime_UTR	NC_001366.1	KHDRBS3	ENSG00000131773
1174	4	+	16	1000	11.573	2.58561	698	0.180992	1	GCF_000861505.1_ViralProj15357_genomic.gff:NC_001897.1	five_prime_UTR	NC_001897.1	KHDRBS3	ENSG00000131773
1174	4	+	4	1000	2.178	1.07957	83	0.17418	1	GCF_000861505.1_ViralProj15357_genomic.gff:NC_001897.1	three_prime_UTR	NC_001897.1	KHDRBS3	ENSG00000131773
1174	4	+	1	1000	1.391	1.03884	337	1	1	GCF_000861845.1_ViralProj15432_genomic.gff:NC_004102.1	five_prime_UTR	NC_004102.1	KHDRBS3	ENSG00000131773
1174	4	+	2	1000	0.812	0.751812	265	0.195423	1	GCF_000861845.1_ViralProj15432_genomic.gff:NC_004102.1	three_prime_UTR	NC_004102.1	KHDRBS3	ENSG00000131773
1174	4	+	8	1000	7.759	2.19311	746	0.855989	1	GCF_000861905.1_ViralProj15445_genomic.gff:NC_001612.1	five_prime_UTR	NC_001612.1	KHDRBS3	ENSG00000131773
1174	4	+	2	1000	1.54	0.923717	77	0.668333	1	GCF_000861905.1_ViralProj15445_genomic.gff:NC_001612.1	three_prime_UTR	NC_001612.1	KHDRBS3	ENSG00000131773
1174	4	+	0	1000	0.658	0.620823	40	1	1	GCF_000862105.1_ViralProj15302_genomic.gff:NC_001449.1	five_prime_UTR	NC_001449.1	KHDRBS3	ENSG00000131773
1174	4	+	2	1000	2.612	1.11476	114	1	1	GCF_000862105.1_ViralProj15302_genomic.gff:NC_001449.1	three_prime_UTR	NC_001449.1	KHDRBS3	ENSG00000131773
1174	4	+	2	1000	1.002	0.79412	90	0.264977	1	GCF_000862125.1_ViralProj15306_genomic.gff:NC_001477.1	five_prime_UTR	NC_001477.1	KHDRBS3	ENSG00000131773
1174	4	+	4	1000	4.894	1.72619	458	1	1	GCF_000862125.1_ViralProj15306_genomic.gff:NC_001477.1	three_prime_UTR	NC_001477.1	KHDRBS3	ENSG00000131773
1174	4	+	0	1000	0.304	0.505806	125	1	1	GCF_000863165.1_ViralProj15343_genomic.gff:NC_001809.1	five_prime_UTR	NC_001809.1	KHDRBS3	ENSG00000131773
1174	4	+	1	1000	1.105	0.918051	493	1	1	GCF_000863165.1_ViralProj15343_genomic.gff:NC_001809.1	three_prime_UTR	NC_001809.1	KHDRBS3	ENSG00000131773
1174	4	+	0	1000	0.304	0.481473	72	1	1	GCF_000863385.1_ViralProj15392_genomic.gff:NC_003417.1	five_prime_UTR	NC_003417.1	KHDRBS3	ENSG00000131773
1174	4	+	4	1000	2.432	0.987092	62	0.309201	1	GCF_000864005.1_ViralProj15520_genomic.gff:NC_001959.2	three_prime_UTR	NC_001959.2	KHDRBS3	ENSG00000131773
1174	4	+	2	1000	0.826	0.773513	97	0.20031	1	GCF_000865065.1_ViralProj15599_genomic.gff:NC_002640.1	five_prime_UTR	NC_002640.1	KHDRBS3	ENSG00000131773
1174	4	+	4	1000	3.217	1.4704	380	0.569251	1	GCF_000865065.1_ViralProj15599_genomic.gff:NC_002640.1	three_prime_UTR	NC_002640.1	KHDRBS3	ENSG00000131773
1174	4	+	1	1000	0.583	0.647712	90	0.442836	1	GCF_000866625.1_ViralProj15598_genomic.gff:NC_001475.2	five_prime_UTR	NC_001475.2	KHDRBS3	ENSG00000131773
1174	4	+	4	1000	3.194	1.49954	436	0.567233	1	GCF_000866625.1_ViralProj15598_genomic.gff:NC_001475.2	three_prime_UTR	NC_001475.2	KHDRBS3	ENSG00000131773
1174	4	+	2	1000	2.099	1.19525	336	1	1	GCF_000871165.1_ViralProj20937_genomic.gff:NC_009823.1	five_prime_UTR	NC_009823.1	KHDRBS3	ENSG00000131773
1174	4	+	2	1000	0.895	0.75269	265	0.225623	1	GCF_000871165.1_ViralProj20937_genomic.gff:NC_009823.1	three_prime_UTR	NC_009823.1	KHDRBS3	ENSG00000131773
1174	4	+	9	1000	9.482	2.49477	1036	1	1	GCF_000871545.1_ViralProj19577_genomic.gff:NC_009448.2	five_prime_UTR	NC_009448.2	KHDRBS3	ENSG00000131773
1174	4	+	0	1000	0.19	0.392497	42	1	1	GCF_000871545.1_ViralProj19577_genomic.gff:NC_009448.2	three_prime_UTR	NC_009448.2	KHDRBS3	ENSG00000131773
1174	4	+	2	1000	0.889	0.80705	92	0.223295	1	GCF_000871845.1_ViralProj20183_genomic.gff:NC_001474.2	five_prime_UTR	NC_001474.2	KHDRBS3	ENSG00000131773
1174	4	+	5	1000	6.053	1.93906	447	0.838326	1	GCF_000871845.1_ViralProj20183_genomic.gff:NC_001474.2	three_prime_UTR	NC_001474.2	KHDRBS3	ENSG00000131773
1174	4	+	1	1000	1.564	1.06913	338	1	1	GCF_000872025.1_ViralProj20939_genomic.gff:NC_009827.1	five_prime_UTR	NC_009827.1	KHDRBS3	ENSG00000131773
1174	4	+	2	1000	1.032	0.863552	225	0.276038	1	GCF_000872025.1_ViralProj20939_genomic.gff:NC_009827.1	three_prime_UTR	NC_009827.1	KHDRBS3	ENSG00000131773
1174	4	+	1	1000	1.267	0.968839	275	1	1	GCF_000873605.1_ViralProj20935_genomic.gff:NC_009826.1	five_prime_UTR	NC_009826.1	KHDRBS3	ENSG00000131773
1174	4	+	1	989	0.358948	0.479935	15	0.304631	1	GCF_000873605.1_ViralProj20935_genomic.gff:NC_009826.1	three_prime_UTR	NC_009826.1	KHDRBS3	ENSG00000131773
1174	4	+	1	1000	1.546	1.0271	275	1	1	GCF_000874265.1_ViralProj20933_genomic.gff:NC_009825.1	five_prime_UTR	NC_009825.1	KHDRBS3	ENSG00000131773
1174	4	+	1	1000	0.236	0.424835	45	0.21071	1	GCF_000874265.1_ViralProj20933_genomic.gff:NC_009825.1	three_prime_UTR	NC_009825.1	KHDRBS3	ENSG00000131773
1174	4	+	0	1000	1.429	1.06023	335	0.412071	1	GCF_000874285.1_ViralProj20941_genomic.gff:NC_009824.1	five_prime_UTR	NC_009824.1	KHDRBS3	ENSG00000131773
1174	4	+	1	998	0.468938	0.536096	16	0.378704	1	GCF_000874285.1_ViralProj20941_genomic.gff:NC_009824.1	three_prime_UTR	NC_009824.1	KHDRBS3	ENSG00000131773
1174	4	+	5	1000	2.828	1.03222	54	0.206409	1	GCF_000880715.1_ViralProj32327_genomic.gff:NC_011400.1	three_prime_UTR	NC_011400.1	KHDRBS3	ENSG00000131773
1174	4	+	2	1000	0.485	0.606748	102	0.0853217	1	GCF_000882815.3_ViralProj36615_genomic.gff:NC_012532.1	five_prime_UTR	NC_012532.1	KHDRBS3	ENSG00000131773
1174	4	+	1	1000	1.58	1.06712	424	1	1	GCF_000882815.3_ViralProj36615_genomic.gff:NC_012532.1	three_prime_UTR	NC_012532.1	KHDRBS3	ENSG00000131773
1174	4	+	6	1000	5.751	1.87043	745	0.832812	1	GCF_000884955.1_ViralProj38499_genomic.gff:NC_012801.1	five_prime_UTR	NC_012801.1	KHDRBS3	ENSG00000131773
1174	4	+	3	1000	3.155	1.04022	77	1	1	GCF_000884955.1_ViralProj38499_genomic.gff:NC_012801.1	three_prime_UTR	NC_012801.1	KHDRBS3	ENSG00000131773
1174	4	+	7	1000	8.57	2.44522	1160	0.731776	1	GCF_000885595.1_ViralProj38497_genomic.gff:NC_012800.1	five_prime_UTR	NC_012800.1	KHDRBS3	ENSG00000131773
1174	4	+	3	1000	2.521	1.07458	89	0.742068	1	GCF_000885595.1_ViralProj38497_genomic.gff:NC_012800.1	three_prime_UTR	NC_012800.1	KHDRBS3	ENSG00000131773
1174	4	+	3	1000	2.037	1.08296	94	0.460968	1	GCF_000885815.1_ViralProj39811_genomic.gff:NC_013060.1	three_prime_UTR	NC_013060.1	KHDRBS3	ENSG00000131773
1174	4	+	3	1000	1.801	1.06702	134	0.26928	1	GCF_000886455.1_ViralProj38493_genomic.gff:NC_012798.1	five_prime_UTR	NC_012798.1	KHDRBS3	ENSG00000131773
1174	4	+	3	1000	1.752	0.971308	78	0.255795	1	GCF_000886455.1_ViralProj38493_genomic.gff:NC_012798.1	three_prime_UTR	NC_012798.1	KHDRBS3	ENSG00000131773
1174	4	+	4	1000	4.853	1.86087	743	1	1	GCF_000886475.1_ViralProj38501_genomic.gff:NC_012802.1	five_prime_UTR	NC_012802.1	KHDRBS3	ENSG00000131773
1174	4	+	2	1000	0.986	0.77227	83	0.259056	1	GCF_000886475.1_ViralProj38501_genomic.gff:NC_012802.1	three_prime_UTR	NC_012802.1	KHDRBS3	ENSG00000131773
1174	4	+	1	1000	0.209	0.406798	35	0.189113	1	GCF_000895575.1_ViralProj76723_genomic.gff:NC_016155.1	three_prime_UTR	NC_016155.1	KHDRBS3	ENSG00000131773
1174	4	+	0	1000	0.247	0.431483	36	1	1	GCF_000897955.1_ViralProj178562_genomic.gff:NC_019027.1	five_prime_UTR	NC_019027.1	KHDRBS3	ENSG00000131773
1174	4	+	1	1000	1.087	0.862656	111	1	1	GCF_000897955.1_ViralProj178562_genomic.gff:NC_019027.1	three_prime_UTR	NC_019027.1	KHDRBS3	ENSG00000131773
1174	4	+	1	1000	0.382	0.52187	34	0.318979	1	GCF_000899535.1_ViralProj178563_genomic.gff:NC_019028.1	three_prime_UTR	NC_019028.1	KHDRBS3	ENSG00000131773
1174	4	+	6	1000	4.442	1.5707	274	0.46431	1	GCF_000901155.1_ViralProj183710_genomic.gff:NC_019843.3	five_prime_UTR	NC_019843.3	KHDRBS3	ENSG00000131773
1174	4	+	17	1000	16.056	3.03415	1015	0.800456	1	GCF_000901155.1_ViralProj183710_genomic.gff:NC_019843.3	three_prime_UTR	NC_019843.3	KHDRBS3	ENSG00000131773
1174	4	+	5	1000	2.717	1.14988	91	0.20008	1	GCF_000901475.1_ViralProj178564_genomic.gff:NC_019026.1	three_prime_UTR	NC_019026.1	KHDRBS3	ENSG00000131773
1174	4	+	0	1000	0.834	0.700667	38	1	1	GCF_000917835.1_ViralProj242273_genomic.gff:NC_023812.1	five_prime_UTR	NC_023812.1	KHDRBS3	ENSG00000131773
1174	4	+	12	1000	9.857	2.01609	329	0.420639	1	GCF_000917835.1_ViralProj242273_genomic.gff:NC_023812.1	three_prime_UTR	NC_023812.1	KHDRBS3	ENSG00000131773
1174	4	+	4	1000	4.483	1.69723	516	1	1	GCF_000921975.1_ViralProj253339_genomic.gff:NC_024377.1	five_prime_UTR	NC_024377.1	KHDRBS3	ENSG00000131773
1174	4	+	4	1000	2.126	1.18471	304	0.165711	1	GCF_000921975.1_ViralProj253339_genomic.gff:NC_024377.1	three_prime_UTR	NC_024377.1	KHDRBS3	ENSG00000131773
1174	4	+	1	1000	1.199	0.945671	323	1	1	GCF_001310135.2_ViralProj298087_genomic.gff:NC_027998.2	five_prime_UTR	NC_027998.2	KHDRBS3	ENSG00000131773
1174	4	+	6	1000	3.072	1.41521	362	0.136207	1	GCF_001310135.2_ViralProj298087_genomic.gff:NC_027998.2	three_prime_UTR	NC_027998.2	KHDRBS3	ENSG00000131773
1174	4	+	0	1000	1.246	1.00324	335	0.641081	1	GCF_001712785.1_ViralProj339556_genomic.gff:NC_030791.1	five_prime_UTR	NC_030791.1	KHDRBS3	ENSG00000131773
1174	4	+	2	1000	1.018	0.708645	58	0.270912	1	GCF_001712785.1_ViralProj339556_genomic.gff:NC_030791.1	three_prime_UTR	NC_030791.1	KHDRBS3	ENSG00000131773
1174	4	+	2	1000	1.557	1.03722	178	0.671199	1	GCF_002117635.1_ViralProj384965_genomic.gff:NC_034385.1	five_prime_UTR	NC_034385.1	KHDRBS3	ENSG00000131773
1174	4	+	0	1000	1.238	0.855621	83	0.638972	1	GCF_002117635.1_ViralProj384965_genomic.gff:NC_034385.1	three_prime_UTR	NC_034385.1	KHDRBS3	ENSG00000131773
1174	4	+	9	1000	8.354	2.24092	738	0.727602	1	GCF_002816685.1_ASM281668v1_genomic.gff:NC_038307.1	five_prime_UTR	NC_038307.1	KHDRBS3	ENSG00000131773
1174	4	+	5	1000	2.747	1.12706	95	0.202916	1	GCF_002816685.1_ASM281668v1_genomic.gff:NC_038307.1	three_prime_UTR	NC_038307.1	KHDRBS3	ENSG00000131773
1174	4	+	16	1000	12.117	2.59307	728	0.245111	1	GCF_002816725.1_ASM281672v1_genomic.gff:NC_038308.1	five_prime_UTR	NC_038308.1	KHDRBS3	ENSG00000131773
1174	4	+	3	1000	1.766	0.926338	64	0.259393	1	GCF_002816725.1_ASM281672v1_genomic.gff:NC_038308.1	three_prime_UTR	NC_038308.1	KHDRBS3	ENSG00000131773
1174	4	+	0	1000	1.607	1.10534	441	0.418166	1	GCF_002820785.1_ASM282078v1_genomic.gff:NC_038426.1	five_prime_UTR	NC_038426.1	KHDRBS3	ENSG00000131773
1174	4	+	3	1000	1.241	0.861197	99	0.12845	0.997019	GCF_002820785.1_ASM282078v1_genomic.gff:NC_038426.1	three_prime_UTR	NC_038426.1	KHDRBS3	ENSG00000131773
1174	4	+	1	1000	1.253	0.981812	325	1	1	GCF_002821385.1_ASM282138v1_genomic.gff:NC_038436.1	five_prime_UTR	NC_038436.1	KHDRBS3	ENSG00000131773
1174	4	+	1	1000	0.947	0.713232	31	0.617783	1	GCF_002821385.1_ASM282138v1_genomic.gff:NC_038436.1	three_prime_UTR	NC_038436.1	KHDRBS3	ENSG00000131773
1174	4	+	9	1000	4.922	1.62251	261	0.0682508	1	GCF_009858895.2_ASM985889v3_genomic.gff:NC_045512.2	five_prime_UTR	NC_045512.2	KHDRBS3	ENSG00000131773
1174	4	+	6	1000	6.786	1.81976	225	1	1	GCF_009858895.2_ASM985889v3_genomic.gff:NC_045512.2	three_prime_UTR	NC_045512.2	KHDRBS3	ENSG00000131773
M349_0.6	7	+	1	1000	0.135	0.350568	17	0.126755	1	GCF_000850885.1_ViralProj14831_genomic.gff:NC_003908.1	five_prime_UTR	NC_003908.1	PABPC1	ENSG00000070756
M349_0.6	7	+	0	1000	0.694	0.822825	294	1	1	GCF_000850885.1_ViralProj14831_genomic.gff:NC_003908.1	three_prime_UTR	NC_003908.1	PABPC1	ENSG00000070756
M349_0.6	7	+	1	1000	0.552	0.714007	801	0.424312	1	GCF_000853805.1_ViralProj14948_genomic.gff:NC_004421.1	five_prime_UTR	NC_004421.1	PABPC1	ENSG00000070756
M349_0.6	7	+	0	1000	0.085	0.286106	167	1	1	GCF_000853805.1_ViralProj14948_genomic.gff:NC_004421.1	three_prime_UTR	NC_004421.1	PABPC1	ENSG00000070756
M349_0.6	7	+	0	1000	0.219	0.45962	279	1	1	GCF_000853865.1_ViralProj14960_genomic.gff:NC_005831.2	five_prime_UTR	NC_005831.2	PABPC1	ENSG00000070756
M349_0.6	7	+	0	1000	0.227	0.477178	280	1	1	GCF_000853865.1_ViralProj14960_genomic.gff:NC_005831.2	three_prime_UTR	NC_005831.2	PABPC1	ENSG00000070756
M349_0.6	7	+	0	1000	0.037	0.188856	123	1	1	GCF_000860805.1_ViralProj15370_genomic.gff:NC_003690.1	five_prime_UTR	NC_003690.1	PABPC1	ENSG00000070756
M349_0.6	7	+	0	1000	0.506	0.718666	561	1	1	GCF_000860805.1_ViralProj15370_genomic.gff:NC_003690.1	three_prime_UTR	NC_003690.1	PABPC1	ENSG00000070756
M349_0.6	7	+	0	1000	0.088	0.283437	89	1	1	GCF_000861085.1_ViralProj15431_genomic.gff:NC_001563.2	five_prime_UTR	NC_001563.2	PABPC1	ENSG00000070756
M349_0.6	7	+	0	1000	0.581	0.756314	566	1	1	GCF_000861085.1_ViralProj15431_genomic.gff:NC_001563.2	three_prime_UTR	NC_001563.2	PABPC1	ENSG00000070756
M349_0.6	7	+	3	1000	0.655	0.792845	735	0.0288298	1	GCF_000861165.1_ViralProj15288_genomic.gff:NC_002058.3	five_prime_UTR	NC_002058.3	PABPC1	ENSG00000070756
M349_0.6	7	+	1	1000	0.667	0.773763	1060	0.486862	1	GCF_000861185.1_ViralProj15292_genomic.gff:NC_001366.1	five_prime_UTR	NC_001366.1	PABPC1	ENSG00000070756
M349_0.6	7	+	0	1000	0.816	0.854912	695	1	1	GCF_000861505.1_ViralProj15357_genomic.gff:NC_001897.1	five_prime_UTR	NC_001897.1	PABPC1	ENSG00000070756
M349_0.6	7	+	0	1000	0.105	0.325701	80	1	1	GCF_000861505.1_ViralProj15357_genomic.gff:NC_001897.1	three_prime_UTR	NC_001897.1	PABPC1	ENSG00000070756
M349_0.6	7	+	0	1000	0.112	0.331007	334	1	1	GCF_000861845.1_ViralProj15432_genomic.gff:NC_004102.1	five_prime_UTR	NC_004102.1	PABPC1	ENSG00000070756
M349_0.6	7	+	0	1000	0.016	0.125538	262	1	1	GCF_000861845.1_ViralProj15432_genomic.gff:NC_004102.1	three_prime_UTR	NC_004102.1	PABPC1	ENSG00000070756
M349_0.6	7	+	0	1000	0.574	0.72322	743	1	1	GCF_000861905.1_ViralProj15445_genomic.gff:NC_001612.1	five_prime_UTR	NC_001612.1	PABPC1	ENSG00000070756
M349_0.6	7	+	0	1000	0.081	0.28376	74	1	1	GCF_000861905.1_ViralProj15445_genomic.gff:NC_001612.1	three_prime_UTR	NC_001612.1	PABPC1	ENSG00000070756
M349_0.6	7	+	0	1000	0.048	0.213873	37	1	1	GCF_000862105.1_ViralProj15302_genomic.gff:NC_001449.1	five_prime_UTR	NC_001449.1	PABPC1	ENSG00000070756
M349_0.6	7	+	0	1000	0.019	0.136593	111	1	1	GCF_000862105.1_ViralProj15302_genomic.gff:NC_001449.1	three_prime_UTR	NC_001449.1	PABPC1	ENSG00000070756
M349_0.6	7	+	0	1000	0.076	0.265131	87	1	1	GCF_000862125.1_ViralProj15306_genomic.gff:NC_001477.1	five_prime_UTR	NC_001477.1	PABPC1	ENSG00000070756
M349_0.6	7	+	1	1000	0.589	0.773743	455	0.44533	1	GCF_000862125.1_ViralProj15306_genomic.gff:NC_001477.1	three_prime_UTR	NC_001477.1	PABPC1	ENSG00000070756
M349_0.6	7	+	0	1000	0.045	0.207408	122	1	1	GCF_000863165.1_ViralProj15343_genomic.gff:NC_001809.1	five_prime_UTR	NC_001809.1	PABPC1	ENSG00000070756
M349_0.6	7	+	0	1000	0.37	0.597877	490	1	1	GCF_000863165.1_ViralProj15343_genomic.gff:NC_001809.1	three_prime_UTR	NC_001809.1	PABPC1	ENSG00000070756
M349_0.6	7	+	0	1000	0.029	0.16789	69	1	1	GCF_000863385.1_ViralProj15392_genomic.gff:NC_003417.1	five_prime_UTR	NC_003417.1	PABPC1	ENSG00000070756
M349_0.6	7	+	0	1000	0.064	0.260714	94	1	1	GCF_000865065.1_ViralProj15599_genomic.gff:NC_002640.1	five_prime_UTR	NC_002640.1	PABPC1	ENSG00000070756
M349_0.6	7	+	1	1000	0.402	0.618691	377	0.331163	1	GCF_000865065.1_ViralProj15599_genomic.gff:NC_002640.1	three_prime_UTR	NC_002640.1	PABPC1	ENSG00000070756
M349_0.6	7	+	0	1000	0.056	0.234348	87	1	1	GCF_000866625.1_ViralProj15598_genomic.gff:NC_001475.2	five_prime_UTR	NC_001475.2	PABPC1	ENSG00000070756
M349_0.6	7	+	0	1000	0.382	0.600364	433	1	1	GCF_000866625.1_ViralProj15598_genomic.gff:NC_001475.2	three_prime_UTR	NC_001475.2	PABPC1	ENSG00000070756
M349_0.6	7	+	0	1000	0.136	0.368293	333	1	1	GCF_000871165.1_ViralProj20937_genomic.gff:NC_009823.1	five_prime_UTR	NC_009823.1	PABPC1	ENSG00000070756
M349_0.6	7	+	0	1000	0.024	0.153126	262	1	1	GCF_000871165.1_ViralProj20937_genomic.gff:NC_009823.1	three_prime_UTR	NC_009823.1	PABPC1	ENSG00000070756
M349_0.6	7	+	0	1000	0.72	0.823577	1033	1	1	GCF_000871545.1_ViralProj19577_genomic.gff:NC_009448.2	five_prime_UTR	NC_009448.2	PABPC1	ENSG00000070756
M349_0.6	7	+	0	1000	0.038	0.191292	39	1	1	GCF_000871545.1_ViralProj19577_genomic.gff:NC_009448.2	three_prime_UTR	NC_009448.2	PABPC1	ENSG00000070756
M349_0.6	7	+	0	1000	0.087	0.288989	89	1	1	GCF_000871845.1_ViralProj20183_genomic.gff:NC_001474.2	five_prime_UTR	NC_001474.2	PABPC1	ENSG00000070756
M349_0.6	7	+	3	1000	0.527	0.718183	444	0.0164462	1	GCF_000871845.1_ViralProj20183_genomic.gff:NC_001474.2	three_prime_UTR	NC_001474.2	PABPC1	ENSG00000070756
M349_0.6	7	+	0	1000	0.124	0.350352	335	1	1	GCF_000872025.1_ViralProj20939_genomic.gff:NC_009827.1	five_prime_UTR	NC_009827.1	PABPC1	ENSG00000070756
M349_0.6	7	+	0	1000	0.031	0.173404	222	1	1	GCF_000872025.1_ViralProj20939_genomic.gff:NC_009827.1	three_prime_UTR	NC_009827.1	PABPC1	ENSG00000070756
M349_0.6	7	+	0	1000	0.066	0.256339	272	1	1	GCF_000873605.1_ViralProj20935_genomic.gff:NC_009826.1	five_prime_UTR	NC_009826.1	PABPC1	ENSG00000070756
M349_0.6	7	+	0	989	0.0404449	0.1971	12	1	1	GCF_000873605.1_ViralProj20935_genomic.gff:NC_009826.1	three_prime_UTR	NC_009826.1	PABPC1	ENSG00000070756
M349_0.6	7	+	0	1000	0.077	0.277756	272	1	1	GCF_000874265.1_ViralProj20933_genomic.gff:NC_009825.1	five_prime_UTR	NC_009825.1	PABPC1	ENSG00000070756
M349_0.6	7	+	0	1000	0.007	0.0834144	42	1	1	GCF_000874265.1_ViralProj20933_genomic.gff:NC_009825.1	three_prime_UTR	NC_009825.1	PABPC1	ENSG00000070756
M349_0.6	7	+	0	1000	0.118	0.34087	332	1	1	GCF_000874285.1_ViralProj20941_genomic.gff:NC_009824.1	five_prime_UTR	NC_009824.1	PABPC1	ENSG00000070756
M349_0.6	7	+	0	998	0.0711423	0.257191	13	1	1	GCF_000874285.1_ViralProj20941_genomic.gff:NC_009824.1	three_prime_UTR	NC_009824.1	PABPC1	ENSG00000070756
M349_0.6	7	+	0	1000	0.044	0.210019	99	1	1	GCF_000882815.3_ViralProj36615_genomic.gff:NC_012532.1	five_prime_UTR	NC_012532.1	PABPC1	ENSG00000070756
M349_0.6	7	+	0	1000	0.256	0.484457	421	1	1	GCF_000882815.3_ViralProj36615_genomic.gff:NC_012532.1	three_prime_UTR	NC_012532.1	PABPC1	ENSG00000070756
M349_0.6	7	+	0	1000	0.476	0.675189	742	1	1	GCF_000884955.1_ViralProj38499_genomic.gff:NC_012801.1	five_prime_UTR	NC_012801.1	PABPC1	ENSG00000070756
M349_0.6	7	+	0	1000	0.019	0.136593	74	1	1	GCF_000884955.1_ViralProj38499_genomic.gff:NC_012801.1	three_prime_UTR	NC_012801.1	PABPC1	ENSG00000070756
M349_0.6	7	+	0	1000	0.732	0.817829	1157	1	1	GCF_000885595.1_ViralProj38497_genomic.gff:NC_012800.1	five_prime_UTR	NC_012800.1	PABPC1	ENSG00000070756
M349_0.6	7	+	0	1000	0.002	0.044699	31	1	1	GCF_000885815.1_ViralProj39811_genomic.gff:NC_013060.1	five_prime_UTR	NC_013060.1	PABPC1	ENSG00000070756
M349_0.6	7	+	0	1000	0.038	0.191292	91	1	1	GCF_000885815.1_ViralProj39811_genomic.gff:NC_013060.1	three_prime_UTR	NC_013060.1	PABPC1	ENSG00000070756
M349_0.6	7	+	0	1000	0.153	0.381755	131	1	1	GCF_000886455.1_ViralProj38493_genomic.gff:NC_012798.1	five_prime_UTR	NC_012798.1	PABPC1	ENSG00000070756
M349_0.6	7	+	0	1000	0.069	0.268908	75	1	1	GCF_000886455.1_ViralProj38493_genomic.gff:NC_012798.1	three_prime_UTR	NC_012798.1	PABPC1	ENSG00000070756
M349_0.6	7	+	0	1000	0.419	0.65869	740	1	1	GCF_000886475.1_ViralProj38501_genomic.gff:NC_012802.1	five_prime_UTR	NC_012802.1	PABPC1	ENSG00000070756
M349_0.6	7	+	0	1000	0.024	0.153126	80	1	1	GCF_000886475.1_ViralProj38501_genomic.gff:NC_012802.1	three_prime_UTR	NC_012802.1	PABPC1	ENSG00000070756
M349_0.6	7	+	0	1000	0.037	0.188856	108	1	1	GCF_000897955.1_ViralProj178562_genomic.gff:NC_019027.1	three_prime_UTR	NC_019027.1	PABPC1	ENSG00000070756
M349_0.6	7	+	0	1000	0.244	0.46549	271	1	1	GCF_000901155.1_ViralProj183710_genomic.gff:NC_019843.3	five_prime_UTR	NC_019843.3	PABPC1	ENSG00000070756
M349_0.6	7	+	1	1000	1.226	1.11453	1012	1	1	GCF_000901155.1_ViralProj183710_genomic.gff:NC_019843.3	three_prime_UTR	NC_019843.3	PABPC1	ENSG00000070756
M349_0.6	7	+	0	1000	0.076	0.265131	88	1	1	GCF_000901475.1_ViralProj178564_genomic.gff:NC_019026.1	three_prime_UTR	NC_019026.1	PABPC1	ENSG00000070756
M349_0.6	7	+	0	1000	0.043	0.202959	35	1	1	GCF_000917835.1_ViralProj242273_genomic.gff:NC_023812.1	five_prime_UTR	NC_023812.1	PABPC1	ENSG00000070756
M349_0.6	7	+	0	1000	0.507	0.717262	326	1	1	GCF_000917835.1_ViralProj242273_genomic.gff:NC_023812.1	three_prime_UTR	NC_023812.1	PABPC1	ENSG00000070756
M349_0.6	7	+	0	1000	0.288	0.537908	513	1	1	GCF_000921975.1_ViralProj253339_genomic.gff:NC_024377.1	five_prime_UTR	NC_024377.1	PABPC1	ENSG00000070756
M349_0.6	7	+	0	1000	0.151	0.392878	301	1	1	GCF_000921975.1_ViralProj253339_genomic.gff:NC_024377.1	three_prime_UTR	NC_024377.1	PABPC1	ENSG00000070756
M349_0.6	7	+	0	1000	0.115	0.334495	320	1	1	GCF_001310135.2_ViralProj298087_genomic.gff:NC_027998.2	five_prime_UTR	NC_027998.2	PABPC1	ENSG00000070756
M349_0.6	7	+	0	1000	0.339	0.56249	359	1	1	GCF_001310135.2_ViralProj298087_genomic.gff:NC_027998.2	three_prime_UTR	NC_027998.2	PABPC1	ENSG00000070756
M349_0.6	7	+	0	1000	0.11	0.325586	332	1	1	GCF_001712785.1_ViralProj339556_genomic.gff:NC_030791.1	five_prime_UTR	NC_030791.1	PABPC1	ENSG00000070756
M349_0.6	7	+	0	1000	0.016	0.125538	55	1	1	GCF_001712785.1_ViralProj339556_genomic.gff:NC_030791.1	three_prime_UTR	NC_030791.1	PABPC1	ENSG00000070756
M349_0.6	7	+	0	1000	0.083	0.27602	175	1	1	GCF_002117635.1_ViralProj384965_genomic.gff:NC_034385.1	five_prime_UTR	NC_034385.1	PABPC1	ENSG00000070756
M349_0.6	7	+	0	1000	0.024	0.153126	80	1	1	GCF_002117635.1_ViralProj384965_genomic.gff:NC_034385.1	three_prime_UTR	NC_034385.1	PABPC1	ENSG00000070756
M349_0.6	7	+	0	1000	0.689	0.781594	735	1	1	GCF_002816685.1_ASM281668v1_genomic.gff:NC_038307.1	five_prime_UTR	NC_038307.1	PABPC1	ENSG00000070756
M349_0.6	7	+	0	1000	0.172	0.40321	92	1	1	GCF_002816685.1_ASM281668v1_genomic.gff:NC_038307.1	three_prime_UTR	NC_038307.1	PABPC1	ENSG00000070756
M349_0.6	7	+	2	1000	0.853	0.867262	725	0.210341	1	GCF_002816725.1_ASM281672v1_genomic.gff:NC_038308.1	five_prime_UTR	NC_038308.1	PABPC1	ENSG00000070756
M349_0.6	7	+	0	1000	0.136	0.360047	61	1	1	GCF_002816725.1_ASM281672v1_genomic.gff:NC_038308.1	three_prime_UTR	NC_038308.1	PABPC1	ENSG00000070756
M349_0.6	7	+	1	1000	0.138	0.356487	438	0.12892	1	GCF_002820785.1_ASM282078v1_genomic.gff:NC_038426.1	five_prime_UTR	NC_038426.1	PABPC1	ENSG00000070756
M349_0.6	7	+	0	1000	0.06	0.237606	96	1	1	GCF_002820785.1_ASM282078v1_genomic.gff:NC_038426.1	three_prime_UTR	NC_038426.1	PABPC1	ENSG00000070756
M349_0.6	7	+	0	1000	0.159	0.392266	322	1	1	GCF_002821385.1_ASM282138v1_genomic.gff:NC_038436.1	five_prime_UTR	NC_038436.1	PABPC1	ENSG00000070756
M349_0.6	7	+	0	1000	0.114	0.327278	28	1	1	GCF_002821385.1_ASM282138v1_genomic.gff:NC_038436.1	three_prime_UTR	NC_038436.1	PABPC1	ENSG00000070756
M349_0.6	7	+	1	1000	0.358	0.590071	258	0.301101	1	GCF_009858895.2_ASM985889v3_genomic.gff:NC_045512.2	five_prime_UTR	NC_045512.2	PABPC1	ENSG00000070756
M349_0.6	7	+	0	1000	0.306	0.537264	222	1	1	GCF_009858895.2_ASM985889v3_genomic.gff:NC_045512.2	three_prime_UTR	NC_045512.2	PABPC1	ENSG00000070756
encode_SF1_1	5	+	1	1000	0.483	0.595034	19	0.386911	1	GCF_000850885.1_ViralProj14831_genomic.gff:NC_003908.1	five_prime_UTR	NC_003908.1	SF1
encode_SF1_1	5	+	3	1000	3.334	1.6647	296	1	1	GCF_000850885.1_ViralProj14831_genomic.gff:NC_003908.1	three_prime_UTR	NC_003908.1	SF1
encode_SF1_1	5	+	1	1000	2.714	1.48135	803	0.534499	1	GCF_000853805.1_ViralProj14948_genomic.gff:NC_004421.1	five_prime_UTR	NC_004421.1	SF1
encode_SF1_1	5	+	0	1000	0.494	0.646825	169	1	1	GCF_000853805.1_ViralProj14948_genomic.gff:NC_004421.1	three_prime_UTR	NC_004421.1	SF1
encode_SF1_1	5	+	2	1000	2.179	1.36705	281	1	1	GCF_000853865.1_ViralProj14960_genomic.gff:NC_005831.2	five_prime_UTR	NC_005831.2	SF1
encode_SF1_1	5	+	1	1000	2.128	1.33694	282	0.729438	1	GCF_000853865.1_ViralProj14960_genomic.gff:NC_005831.2	three_prime_UTR	NC_005831.2	SF1
encode_SF1_1	5	+	0	1000	0.091	0.294628	125	1	1	GCF_000860805.1_ViralProj15370_genomic.gff:NC_003690.1	five_prime_UTR	NC_003690.1	SF1
encode_SF1_1	5	+	1	1000	0.997	0.918605	563	0.631341	1	GCF_000860805.1_ViralProj15370_genomic.gff:NC_003690.1	three_prime_UTR	NC_003690.1	SF1
encode_SF1_1	5	+	2	1000	0.351	0.569318	91	0.0486071	1	GCF_000861085.1_ViralProj15431_genomic.gff:NC_001563.2	five_prime_UTR	NC_001563.2	SF1
encode_SF1_1	5	+	3	1000	2.222	1.3981	568	0.491216	1	GCF_000861085.1_ViralProj15431_genomic.gff:NC_001563.2	three_prime_UTR	NC_001563.2	SF1
encode_SF1_1	5	+	2	1000	3.679	1.81418	737	0.596861	1	GCF_000861165.1_ViralProj15288_genomic.gff:NC_002058.3	five_prime_UTR	NC_002058.3	SF1
encode_SF1_1	5	+	4	1000	3.303	1.71234	1062	0.578226	1	GCF_000861185.1_ViralProj15292_genomic.gff:NC_001366.1	five_prime_UTR	NC_001366.1	SF1
encode_SF1_1	5	+	8	1000	4.726	2.04918	697	0.155858	1	GCF_000861505.1_ViralProj15357_genomic.gff:NC_001897.1	five_prime_UTR	NC_001897.1	SF1
encode_SF1_1	5	+	0	1000	0.817	0.818646	82	1	1	GCF_000861505.1_ViralProj15357_genomic.gff:NC_001897.1	three_prime_UTR	NC_001897.1	SF1
encode_SF1_1	5	+	0	1000	0.666	0.798174	336	1	1	GCF_000861845.1_ViralProj15432_genomic.gff:NC_004102.1	five_prime_UTR	NC_004102.1	SF1
encode_SF1_1	5	+	0	1000	0.279	0.503401	264	1	1	GCF_000861845.1_ViralProj15432_genomic.gff:NC_004102.1	three_prime_UTR	NC_004102.1	SF1
encode_SF1_1	5	+	6	1000	3.644	1.77212	745	0.187439	1	GCF_000861905.1_ViralProj15445_genomic.gff:NC_001612.1	five_prime_UTR	NC_001612.1	SF1
encode_SF1_1	5	+	1	1000	0.69	0.74596	76	0.500002	1	GCF_000861905.1_ViralProj15445_genomic.gff:NC_001612.1	three_prime_UTR	NC_001612.1	SF1
encode_SF1_1	5	+	0	1000	0.192	0.399118	39	1	1	GCF_000862105.1_ViralProj15302_genomic.gff:NC_001449.1	five_prime_UTR	NC_001449.1	SF1
encode_SF1_1	5	+	1	1000	0.578	0.713039	113	0.439812	1	GCF_000862105.1_ViralProj15302_genomic.gff:NC_001449.1	three_prime_UTR	NC_001449.1	SF1
encode_SF1_1	5	+	1	1000	0.358	0.579804	89	0.301431	1	GCF_000862125.1_ViralProj15306_genomic.gff:NC_001477.1	five_prime_UTR	NC_001477.1	SF1
encode_SF1_1	5	+	0	1000	1.656	1.15975	457	0.421373	1	GCF_000862125.1_ViralProj15306_genomic.gff:NC_001477.1	three_prime_UTR	NC_001477.1	SF1
encode_SF1_1	5	+	0	1000	0.093	0.297388	124	1	1	GCF_000863165.1_ViralProj15343_genomic.gff:NC_001809.1	five_prime_UTR	NC_001809.1	SF1
encode_SF1_1	5	+	0	1000	0.421	0.611664	492	1	1	GCF_000863165.1_ViralProj15343_genomic.gff:NC_001809.1	three_prime_UTR	NC_001809.1	SF1
encode_SF1_1	5	+	0	1000	0.166	0.380248	71	1	1	GCF_000863385.1_ViralProj15392_genomic.gff:NC_003417.1	five_prime_UTR	NC_003417.1	SF1
encode_SF1_1	5	+	1	1000	0.541	0.702006	61	0.419237	1	GCF_000864005.1_ViralProj15520_genomic.gff:NC_001959.2	three_prime_UTR	NC_001959.2	SF1
encode_SF1_1	5	+	2	1000	0.258	0.487518	96	0.0278757	1	GCF_000865065.1_ViralProj15599_genomic.gff:NC_002640.1	five_prime_UTR	NC_002640.1	SF1
encode_SF1_1	5	+	2	1000	1.176	1.05931	379	0.328781	1	GCF_000865065.1_ViralProj15599_genomic.gff:NC_002640.1	three_prime_UTR	NC_002640.1	SF1
encode_SF1_1	5	+	0	1000	0.252	0.486552	89	1	1	GCF_000866625.1_ViralProj15598_genomic.gff:NC_001475.2	five_prime_UTR	NC_001475.2	SF1
encode_SF1_1	5	+	1	1000	1.108	0.991625	435	1	1	GCF_000866625.1_ViralProj15598_genomic.gff:NC_001475.2	three_prime_UTR	NC_001475.2	SF1
encode_SF1_1	5	+	1	1000	0.939	0.896707	335	0.609497	1	GCF_000871165.1_ViralProj20937_genomic.gff:NC_009823.1	five_prime_UTR	NC_009823.1	SF1
encode_SF1_1	5	+	2	1000	0.455	0.632752	264	0.0767423	0.57642	GCF_000871165.1_ViralProj20937_genomic.gff:NC_009823.1	three_prime_UTR	NC_009823.1	SF1
encode_SF1_1	5	+	5	1000	3.308	1.76586	1035	0.395846	1	GCF_000871545.1_ViralProj19577_genomic.gff:NC_009448.2	five_prime_UTR	NC_009448.2	SF1
encode_SF1_1	5	+	0	1000	0.11	0.313046	41	1	1	GCF_000871545.1_ViralProj19577_genomic.gff:NC_009448.2	three_prime_UTR	NC_009448.2	SF1
encode_SF1_1	5	+	1	1000	0.368	0.580442	91	0.308399	1	GCF_000871845.1_ViralProj20183_genomic.gff:NC_001474.2	five_prime_UTR	NC_001474.2	SF1
encode_SF1_1	5	+	1	1000	1.936	1.35489	446	1	1	GCF_000871845.1_ViralProj20183_genomic.gff:NC_001474.2	three_prime_UTR	NC_001474.2	SF1
encode_SF1_1	5	+	0	1000	0.704	0.793103	337	1	1	GCF_000872025.1_ViralProj20939_genomic.gff:NC_009827.1	five_prime_UTR	NC_009827.1	SF1
encode_SF1_1	5	+	1	1000	0.473	0.652454	224	0.377181	1	GCF_000872025.1_ViralProj20939_genomic.gff:NC_009827.1	three_prime_UTR	NC_009827.1	SF1
encode_SF1_1	5	+	0	1000	0.489	0.679957	274	1	1	GCF_000873605.1_ViralProj20935_genomic.gff:NC_009826.1	five_prime_UTR	NC_009826.1	SF1
encode_SF1_1	5	+	0	989	0.156724	0.363724	14	1	1	GCF_000873605.1_ViralProj20935_genomic.gff:NC_009826.1	three_prime_UTR	NC_009826.1	SF1
encode_SF1_1	5	+	1	1000	0.62	0.737661	274	0.462433	1	GCF_000874265.1_ViralProj20933_genomic.gff:NC_009825.1	five_prime_UTR	NC_009825.1	SF1
encode_SF1_1	5	+	1	1000	0.213	0.409633	44	0.192262	1	GCF_000874265.1_ViralProj20933_genomic.gff:NC_009825.1	three_prime_UTR	NC_009825.1	SF1
encode_SF1_1	5	+	0	1000	0.647	0.775237	334	1	1	GCF_000874285.1_ViralProj20941_genomic.gff:NC_009824.1	five_prime_UTR	NC_009824.1	SF1
encode_SF1_1	5	+	1	998	0.297595	0.487161	15	0.259616	1	GCF_000874285.1_ViralProj20941_genomic.gff:NC_009824.1	three_prime_UTR	NC_009824.1	SF1
encode_SF1_1	5	+	0	1000	0.552	0.699847	53	1	1	GCF_000880715.1_ViralProj32327_genomic.gff:NC_011400.1	three_prime_UTR	NC_011400.1	SF1
encode_SF1_1	5	+	1	1000	0.15	0.379003	101	0.139388	1	GCF_000882815.3_ViralProj36615_genomic.gff:NC_012532.1	five_prime_UTR	NC_012532.1	SF1
encode_SF1_1	5	+	1	1000	0.556	0.706656	423	0.426711	1	GCF_000882815.3_ViralProj36615_genomic.gff:NC_012532.1	three_prime_UTR	NC_012532.1	SF1
encode_SF1_1	5	+	4	1000	2.476	1.45311	744	0.320852	1	GCF_000884955.1_ViralProj38499_genomic.gff:NC_012801.1	five_prime_UTR	NC_012801.1	SF1
encode_SF1_1	5	+	1	1000	0.713	0.780538	76	0.511475	1	GCF_000884955.1_ViralProj38499_genomic.gff:NC_012801.1	three_prime_UTR	NC_012801.1	SF1
encode_SF1_1	5	+	4	1000	3.616	1.73538	1159	0.787863	1	GCF_000885595.1_ViralProj38497_genomic.gff:NC_012800.1	five_prime_UTR	NC_012800.1	SF1
encode_SF1_1	5	+	0	1000	0.383	0.59889	88	1	1	GCF_000885595.1_ViralProj38497_genomic.gff:NC_012800.1	three_prime_UTR	NC_012800.1	SF1
encode_SF1_1	5	+	1	1000	0.498	0.66516	93	0.393068	1	GCF_000885815.1_ViralProj39811_genomic.gff:NC_013060.1	three_prime_UTR	NC_013060.1	SF1
encode_SF1_1	5	+	1	1000	0.693	0.762452	133	0.500832	1	GCF_000886455.1_ViralProj38493_genomic.gff:NC_012798.1	five_prime_UTR	NC_012798.1	SF1
encode_SF1_1	5	+	1	1000	0.585	0.716441	77	0.444137	1	GCF_000886455.1_ViralProj38493_genomic.gff:NC_012798.1	three_prime_UTR	NC_012798.1	SF1
encode_SF1_1	5	+	1	1000	2.086	1.39016	742	0.729452	1	GCF_000886475.1_ViralProj38501_genomic.gff:NC_012802.1	five_prime_UTR	NC_012802.1	SF1
encode_SF1_1	5	+	0	1000	0.335	0.526357	82	1	1	GCF_000886475.1_ViralProj38501_genomic.gff:NC_012802.1	three_prime_UTR	NC_012802.1	SF1
encode_SF1_1	5	+	1	1000	0.075	0.263523	34	0.0723334	1	GCF_000895575.1_ViralProj76723_genomic.gff:NC_016155.1	three_prime_UTR	NC_016155.1	SF1
encode_SF1_1	5	+	0	1000	0.014	0.117549	35	1	1	GCF_000897955.1_ViralProj178562_genomic.gff:NC_019027.1	five_prime_UTR	NC_019027.1	SF1
encode_SF1_1	5	+	0	1000	0.431	0.622597	110	1	1	GCF_000897955.1_ViralProj178562_genomic.gff:NC_019027.1	three_prime_UTR	NC_019027.1	SF1
encode_SF1_1	5	+	1	1000	0.099	0.302143	33	0.0943921	0.675847	GCF_000899535.1_ViralProj178563_genomic.gff:NC_019028.1	three_prime_UTR	NC_019028.1	SF1
encode_SF1_1	5	+	0	1000	1.659	1.20423	273	0.42109	1	GCF_000901155.1_ViralProj183710_genomic.gff:NC_019843.3	five_prime_UTR	NC_019843.3	SF1
encode_SF1_1	5	+	4	1000	5.174	2.09383	1014	0.824621	1	GCF_000901155.1_ViralProj183710_genomic.gff:NC_019843.3	three_prime_UTR	NC_019843.3	SF1
encode_SF1_1	5	+	2	1000	0.675	0.748288	90	0.146739	1	GCF_000901475.1_ViralProj178564_genomic.gff:NC_019026.1	three_prime_UTR	NC_019026.1	SF1
encode_SF1_1	5	+	0	1000	0.488	0.643638	37	1	1	GCF_000917835.1_ViralProj242273_genomic.gff:NC_023812.1	five_prime_UTR	NC_023812.1	SF1
encode_SF1_1	5	+	3	1000	4.085	1.79471	328	0.803609	1	GCF_000917835.1_ViralProj242273_genomic.gff:NC_023812.1	three_prime_UTR	NC_023812.1	SF1
encode_SF1_1	5	+	1	1000	1.589	1.21142	515	1	1	GCF_000921975.1_ViralProj253339_genomic.gff:NC_024377.1	five_prime_UTR	NC_024377.1	SF1
encode_SF1_1	5	+	1	1000	0.744	0.798186	303	0.525225	1	GCF_000921975.1_ViralProj253339_genomic.gff:NC_024377.1	three_prime_UTR	NC_024377.1	SF1
encode_SF1_1	5	+	0	1000	0.539	0.689169	322	1	1	GCF_001310135.2_ViralProj298087_genomic.gff:NC_027998.2	five_prime_UTR	NC_027998.2	SF1
encode_SF1_1	5	+	3	1000	1.403	1.09626	361	0.166946	1	GCF_001310135.2_ViralProj298087_genomic.gff:NC_027998.2	three_prime_UTR	NC_027998.2	SF1
encode_SF1_1	5	+	0	1000	0.624	0.755775	334	1	1	GCF_001712785.1_ViralProj339556_genomic.gff:NC_030791.1	five_prime_UTR	NC_030791.1	SF1
encode_SF1_1	5	+	1	1000	0.283	0.484919	57	0.247011	1	GCF_001712785.1_ViralProj339556_genomic.gff:NC_030791.1	three_prime_UTR	NC_030791.1	SF1
encode_SF1_1	5	+	0	1000	0.688	0.804552	177	1	1	GCF_002117635.1_ViralProj384965_genomic.gff:NC_034385.1	five_prime_UTR	NC_034385.1	SF1
encode_SF1_1	5	+	0	1000	0.306	0.522146	82	1	1	GCF_002117635.1_ViralProj384965_genomic.gff:NC_034385.1	three_prime_UTR	NC_034385.1	SF1
encode_SF1_1	5	+	6	1000	3.827	1.86616	737	0.292488	1	GCF_002816685.1_ASM281668v1_genomic.gff:NC_038307.1	five_prime_UTR	NC_038307.1	SF1
encode_SF1_1	5	+	2	1000	0.96	0.863218	94	0.249451	1	GCF_002816685.1_ASM281668v1_genomic.gff:NC_038307.1	three_prime_UTR	NC_038307.1	SF1
encode_SF1_1	5	+	9	1000	4.777	1.96294	727	0.0621925	1	GCF_002816725.1_ASM281672v1_genomic.gff:NC_038308.1	five_prime_UTR	NC_038308.1	SF1
encode_SF1_1	5	+	1	1000	0.833	0.832949	63	0.567666	1	GCF_002816725.1_ASM281672v1_genomic.gff:NC_038308.1	three_prime_UTR	NC_038308.1	SF1
encode_SF1_1	5	+	0	1000	0.872	0.8834	440	1	1	GCF_002820785.1_ASM282078v1_genomic.gff:NC_038426.1	five_prime_UTR	NC_038426.1	SF1
encode_SF1_1	5	+	1	1000	0.318	0.530243	98	0.272773	1	GCF_002820785.1_ASM282078v1_genomic.gff:NC_038426.1	three_prime_UTR	NC_038426.1	SF1
encode_SF1_1	5	+	0	1000	0.538	0.678982	324	1	1	GCF_002821385.1_ASM282138v1_genomic.gff:NC_038436.1	five_prime_UTR	NC_038436.1	SF1
encode_SF1_1	5	+	0	1000	0.537	0.63485	30	1	1	GCF_002821385.1_ASM282138v1_genomic.gff:NC_038436.1	three_prime_UTR	NC_038436.1	SF1
encode_SF1_1	5	+	4	1000	2.059	1.31349	260	0.15298	1	GCF_009858895.2_ASM985889v3_genomic.gff:NC_045512.2	five_prime_UTR	NC_045512.2	SF1
encode_SF1_1	5	+	3	1000	1.466	1.10184	224	0.182231	1	GCF_009858895.2_ASM985889v3_genomic.gff:NC_045512.2	three_prime_UTR	NC_045512.2	SF1
encode_SF1_2	5	+	1	1000	0.182	0.39374	19	0.16713	1	GCF_000850885.1_ViralProj14831_genomic.gff:NC_003908.1	five_prime_UTR	NC_003908.1	SF1
encode_SF1_2	5	+	2	1000	1.394	1.14721	296	0.406416	1	GCF_000850885.1_ViralProj14831_genomic.gff:NC_003908.1	three_prime_UTR	NC_003908.1	SF1
encode_SF1_2	5	+	1	1000	0.802	0.872673	803	0.551748	1	GCF_000853805.1_ViralProj14948_genomic.gff:NC_004421.1	five_prime_UTR	NC_004421.1	SF1
encode_SF1_2	5	+	0	1000	0.167	0.388924	169	1	1	GCF_000853805.1_ViralProj14948_genomic.gff:NC_004421.1	three_prime_UTR	NC_004421.1	SF1
encode_SF1_2	5	+	1	1000	1.179	1.03539	281	1	1	GCF_000853865.1_ViralProj14960_genomic.gff:NC_005831.2	five_prime_UTR	NC_005831.2	SF1
encode_SF1_2	5	+	2	1000	1.262	1.05474	282	0.359866	1	GCF_000853865.1_ViralProj14960_genomic.gff:NC_005831.2	three_prime_UTR	NC_005831.2	SF1
encode_SF1_2	5	+	0	1000	0.048	0.213873	125	1	1	GCF_000860805.1_ViralProj15370_genomic.gff:NC_003690.1	five_prime_UTR	NC_003690.1	SF1
encode_SF1_2	5	+	0	1000	0.249	0.476683	563	1	1	GCF_000860805.1_ViralProj15370_genomic.gff:NC_003690.1	three_prime_UTR	NC_003690.1	SF1
encode_SF1_2	5	+	0	1000	0.066	0.256339	91	1	1	GCF_000861085.1_ViralProj15431_genomic.gff:NC_001563.2	five_prime_UTR	NC_001563.2	SF1
encode_SF1_2	5	+	0	1000	0.347	0.578728	568	1	1	GCF_000861085.1_ViralProj15431_genomic.gff:NC_001563.2	three_prime_UTR	NC_001563.2	SF1
encode_SF1_2	5	+	1	1000	1.307	1.12695	737	1	1	GCF_000861165.1_ViralProj15288_genomic.gff:NC_002058.3	five_prime_UTR	NC_002058.3	SF1
encode_SF1_2	5	+	2	1000	1.372	1.15713	1062	0.398546	1	GCF_000861185.1_ViralProj15292_genomic.gff:NC_001366.1	five_prime_UTR	NC_001366.1	SF1
encode_SF1_2	5	+	2	1000	1.364	1.15275	697	0.3958	1	GCF_000861505.1_ViralProj15357_genomic.gff:NC_001897.1	five_prime_UTR	NC_001897.1	SF1
encode_SF1_2	5	+	2	1000	0.663	0.761585	82	0.14258	1	GCF_000861505.1_ViralProj15357_genomic.gff:NC_001897.1	three_prime_UTR	NC_001897.1	SF1
encode_SF1_2	5	+	0	1000	0.147	0.376208	336	1	1	GCF_000861845.1_ViralProj15432_genomic.gff:NC_004102.1	five_prime_UTR	NC_004102.1	SF1
encode_SF1_2	5	+	0	1000	0.293	0.528612	264	1	1	GCF_000861845.1_ViralProj15432_genomic.gff:NC_004102.1	three_prime_UTR	NC_004102.1	SF1
encode_SF1_2	5	+	1	1000	1.102	1.01815	745	1	1	GCF_000861905.1_ViralProj15445_genomic.gff:NC_001612.1	five_prime_UTR	NC_001612.1	SF1
encode_SF1_2	5	+	0	1000	0.241	0.474494	76	1	1	GCF_000861905.1_ViralProj15445_genomic.gff:NC_001612.1	three_prime_UTR	NC_001612.1	SF1
encode_SF1_2	5	+	0	1000	0.014	0.117549	39	1	1	GCF_000862105.1_ViralProj15302_genomic.gff:NC_001449.1	five_prime_UTR	NC_001449.1	SF1
encode_SF1_2	5	+	0	1000	1.025	0.918269	113	0.630599	1	GCF_000862105.1_ViralProj15302_genomic.gff:NC_001449.1	three_prime_UTR	NC_001449.1	SF1
encode_SF1_2	5	+	0	1000	0.147	0.373538	89	1	1	GCF_000862125.1_ViralProj15306_genomic.gff:NC_001477.1	five_prime_UTR	NC_001477.1	SF1
encode_SF1_2	5	+	0	1000	0.337	0.572502	457	1	1	GCF_000862125.1_ViralProj15306_genomic.gff:NC_001477.1	three_prime_UTR	NC_001477.1	SF1
encode_SF1_2	5	+	0	1000	0.047	0.211745	124	1	1	GCF_000863165.1_ViralProj15343_genomic.gff:NC_001809.1	five_prime_UTR	NC_001809.1	SF1
encode_SF1_2	5	+	0	1000	0.125	0.342772	492	1	1	GCF_000863165.1_ViralProj15343_genomic.gff:NC_001809.1	three_prime_UTR	NC_001809.1	SF1
encode_SF1_2	5	+	0	1000	0.038	0.191292	71	1	1	GCF_000863385.1_ViralProj15392_genomic.gff:NC_003417.1	five_prime_UTR	NC_003417.1	SF1
encode_SF1_2	5	+	3	1000	0.82	0.861593	61	0.0491543	1	GCF_000864005.1_ViralProj15520_genomic.gff:NC_001959.2	three_prime_UTR	NC_001959.2	SF1
encode_SF1_2	5	+	0	1000	0.079	0.273558	96	1	1	GCF_000865065.1_ViralProj15599_genomic.gff:NC_002640.1	five_prime_UTR	NC_002640.1	SF1
encode_SF1_2	5	+	1	1000	0.302	0.545062	379	0.260751	1	GCF_000865065.1_ViralProj15599_genomic.gff:NC_002640.1	three_prime_UTR	NC_002640.1	SF1
encode_SF1_2	5	+	0	1000	0.049	0.215976	89	1	1	GCF_000866625.1_ViralProj15598_genomic.gff:NC_001475.2	five_prime_UTR	NC_001475.2	SF1
encode_SF1_2	5	+	0	1000	0.136	0.357256	435	1	1	GCF_000866625.1_ViralProj15598_genomic.gff:NC_001475.2	three_prime_UTR	NC_001475.2	SF1
encode_SF1_2	5	+	0	1000	0.238	0.487436	335	1	1	GCF_000871165.1_ViralProj20937_genomic.gff:NC_009823.1	five_prime_UTR	NC_009823.1	SF1
encode_SF1_2	5	+	0	1000	0.246	0.464435	264	1	1	GCF_000871165.1_ViralProj20937_genomic.gff:NC_009823.1	three_prime_UTR	NC_009823.1	SF1
encode_SF1_2	5	+	3	1000	1.708	1.23623	1035	0.244826	1	GCF_000871545.1_ViralProj19577_genomic.gff:NC_009448.2	five_prime_UTR	NC_009448.2	SF1
encode_SF1_2	5	+	0	1000	0.065	0.246649	41	1	1	GCF_000871545.1_ViralProj19577_genomic.gff:NC_009448.2	three_prime_UTR	NC_009448.2	SF1
encode_SF1_2	5	+	1	1000	0.114	0.34223	91	0.107806	1	GCF_000871845.1_ViralProj20183_genomic.gff:NC_001474.2	five_prime_UTR	NC_001474.2	SF1
encode_SF1_2	5	+	0	1000	0.442	0.631692	446	1	1	GCF_000871845.1_ViralProj20183_genomic.gff:NC_001474.2	three_prime_UTR	NC_001474.2	SF1
encode_SF1_2	5	+	0	1000	0.183	0.411923	337	1	1	GCF_000872025.1_ViralProj20939_genomic.gff:NC_009827.1	five_prime_UTR	NC_009827.1	SF1
encode_SF1_2	5	+	0	1000	0.307	0.524429	224	1	1	GCF_000872025.1_ViralProj20939_genomic.gff:NC_009827.1	three_prime_UTR	NC_009827.1	SF1
encode_SF1_2	5	+	0	1000	0.143	0.369713	274	1	1	GCF_000873605.1_ViralProj20935_genomic.gff:NC_009826.1	five_prime_UTR	NC_009826.1	SF1
encode_SF1_2	5	+	0	1000	0.204	0.434249	274	1	1	GCF_000874265.1_ViralProj20933_genomic.gff:NC_009825.1	five_prime_UTR	NC_009825.1	SF1
encode_SF1_2	5	+	0	1000	0.131	0.363278	334	1	1	GCF_000874285.1_ViralProj20941_genomic.gff:NC_009824.1	five_prime_UTR	NC_009824.1	SF1
encode_SF1_2	5	+	0	998	0.0220441	0.146901	15	1	1	GCF_000874285.1_ViralProj20941_genomic.gff:NC_009824.1	three_prime_UTR	NC_009824.1	SF1
encode_SF1_2	5	+	4	1000	1.037	0.916772	53	0.0200705	0.706481	GCF_000880715.1_ViralProj32327_genomic.gff:NC_011400.1	three_prime_UTR	NC_011400.1	SF1
encode_SF1_2	5	+	1	1000	0.061	0.23945	101	0.0591941	1	GCF_000882815.3_ViralProj36615_genomic.gff:NC_012532.1	five_prime_UTR	NC_012532.1	SF1
encode_SF1_2	5	+	0	1000	0.137	0.377324	423	1	1	GCF_000882815.3_ViralProj36615_genomic.gff:NC_012532.1	three_prime_UTR	NC_012532.1	SF1
encode_SF1_2	5	+	0	1000	0.741	0.860616	744	1	1	GCF_000884955.1_ViralProj38499_genomic.gff:NC_012801.1	five_prime_UTR	NC_012801.1	SF1
encode_SF1_2	5	+	2	1000	1.095	0.954403	76	0.299387	1	GCF_000884955.1_ViralProj38499_genomic.gff:NC_012801.1	three_prime_UTR	NC_012801.1	SF1
encode_SF1_2	5	+	0	1000	1.471	1.11283	1159	0.413307	1	GCF_000885595.1_ViralProj38497_genomic.gff:NC_012800.1	five_prime_UTR	NC_012800.1	SF1
encode_SF1_2	5	+	2	1000	1.123	0.950144	88	0.309668	1	GCF_000885595.1_ViralProj38497_genomic.gff:NC_012800.1	three_prime_UTR	NC_012800.1	SF1
encode_SF1_2	5	+	1	1000	0.575	0.69488	93	0.438299	1	GCF_000885815.1_ViralProj39811_genomic.gff:NC_013060.1	three_prime_UTR	NC_013060.1	SF1
encode_SF1_2	5	+	1	1000	0.291	0.525924	133	0.252723	1	GCF_000886455.1_ViralProj38493_genomic.gff:NC_012798.1	five_prime_UTR	NC_012798.1	SF1
encode_SF1_2	5	+	2	1000	0.534	0.661272	77	0.100174	1	GCF_000886455.1_ViralProj38493_genomic.gff:NC_012798.1	three_prime_UTR	NC_012798.1	SF1
encode_SF1_2	5	+	0	1000	0.725	0.822223	742	1	1	GCF_000886475.1_ViralProj38501_genomic.gff:NC_012802.1	five_prime_UTR	NC_012802.1	SF1
encode_SF1_2	5	+	2	1000	0.37	0.558042	82	0.0533285	1	GCF_000886475.1_ViralProj38501_genomic.gff:NC_012802.1	three_prime_UTR	NC_012802.1	SF1
encode_SF1_2	5	+	1	1000	0.165	0.371366	34	0.152447	1	GCF_000895575.1_ViralProj76723_genomic.gff:NC_016155.1	three_prime_UTR	NC_016155.1	SF1
encode_SF1_2	5	+	0	1000	0.066	0.248406	35	1	1	GCF_000897955.1_ViralProj178562_genomic.gff:NC_019027.1	five_prime_UTR	NC_019027.1	SF1
encode_SF1_2	5	+	1	1000	0.367	0.585366	110	0.307615	1	GCF_000897955.1_ViralProj178562_genomic.gff:NC_019027.1	three_prime_UTR	NC_019027.1	SF1
encode_SF1_2	5	+	1	1000	0.224	0.451695	33	0.201295	1	GCF_000899535.1_ViralProj178563_genomic.gff:NC_019028.1	three_prime_UTR	NC_019028.1	SF1
encode_SF1_2	5	+	3	1000	0.988	0.927748	273	0.0777735	1	GCF_000901155.1_ViralProj183710_genomic.gff:NC_019843.3	five_prime_UTR	NC_019843.3	SF1
encode_SF1_2	5	+	5	1000	2.091	1.40167	1014	0.0610427	0.998881	GCF_000901155.1_ViralProj183710_genomic.gff:NC_019843.3	three_prime_UTR	NC_019843.3	SF1
encode_SF1_2	5	+	3	1000	0.627	0.724152	90	0.0253623	1	GCF_000901475.1_ViralProj178564_genomic.gff:NC_019026.1	three_prime_UTR	NC_019026.1	SF1
encode_SF1_2	5	+	0	1000	0.09	0.286325	37	1	1	GCF_000917835.1_ViralProj242273_genomic.gff:NC_023812.1	five_prime_UTR	NC_023812.1	SF1
encode_SF1_2	5	+	0	1000	1.944	1.3299	328	0.274669	1	GCF_000917835.1_ViralProj242273_genomic.gff:NC_023812.1	three_prime_UTR	NC_023812.1	SF1
encode_SF1_2	5	+	0	1000	0.551	0.722441	515	1	1	GCF_000921975.1_ViralProj253339_genomic.gff:NC_024377.1	five_prime_UTR	NC_024377.1	SF1
encode_SF1_2	5	+	1	1000	0.284	0.513427	303	0.247334	1	GCF_000921975.1_ViralProj253339_genomic.gff:NC_024377.1	three_prime_UTR	NC_024377.1	SF1
encode_SF1_2	5	+	1	1000	0.094	0.298753	322	0.0897297	1	GCF_001310135.2_ViralProj298087_genomic.gff:NC_027998.2	five_prime_UTR	NC_027998.2	SF1
encode_SF1_2	5	+	0	1000	0.249	0.487069	361	1	1	GCF_001310135.2_ViralProj298087_genomic.gff:NC_027998.2	three_prime_UTR	NC_027998.2	SF1
encode_SF1_2	5	+	0	1000	0.117	0.342678	334	1	1	GCF_001712785.1_ViralProj339556_genomic.gff:NC_030791.1	five_prime_UTR	NC_030791.1	SF1
encode_SF1_2	5	+	0	1000	0.233	0.443743	57	1	1	GCF_001712785.1_ViralProj339556_genomic.gff:NC_030791.1	three_prime_UTR	NC_030791.1	SF1
encode_SF1_2	5	+	0	1000	0.276	0.508018	177	1	1	GCF_002117635.1_ViralProj384965_genomic.gff:NC_034385.1	five_prime_UTR	NC_034385.1	SF1
encode_SF1_2	5	+	0	1000	0.479	0.654207	82	1	1	GCF_002117635.1_ViralProj384965_genomic.gff:NC_034385.1	three_prime_UTR	NC_034385.1	SF1
encode_SF1_2	5	+	1	1000	1.135	1.01971	737	1	1	GCF_002816685.1_ASM281668v1_genomic.gff:NC_038307.1	five_prime_UTR	NC_038307.1	SF1
encode_SF1_2	5	+	1	1000	0.347	0.568255	94	0.293648	1	GCF_002816685.1_ASM281668v1_genomic.gff:NC_038307.1	three_prime_UTR	NC_038307.1	SF1
encode_SF1_2	5	+	3	1000	1.427	1.17646	727	0.172927	1	GCF_002816725.1_ASM281672v1_genomic.gff:NC_038308.1	five_prime_UTR	NC_038308.1	SF1
encode_SF1_2	5	+	1	1000	0.129	0.344206	63	0.121142	1	GCF_002816725.1_ASM281672v1_genomic.gff:NC_038308.1	three_prime_UTR	NC_038308.1	SF1
encode_SF1_2	5	+	0	1000	0.228	0.465008	440	1	1	GCF_002820785.1_ASM282078v1_genomic.gff:NC_038426.1	five_prime_UTR	NC_038426.1	SF1
encode_SF1_2	5	+	1	1000	0.216	0.446703	98	0.194457	1	GCF_002820785.1_ASM282078v1_genomic.gff:NC_038426.1	three_prime_UTR	NC_038426.1	SF1
encode_SF1_2	5	+	1	1000	0.113	0.332177	324	0.106867	1	GCF_002821385.1_ASM282138v1_genomic.gff:NC_038436.1	five_prime_UTR	NC_038436.1	SF1
encode_SF1_2	5	+	0	1000	0.055	0.228094	30	1	1	GCF_002821385.1_ASM282138v1_genomic.gff:NC_038436.1	three_prime_UTR	NC_038436.1	SF1
encode_SF1_2	5	+	2	1000	0.684	0.80049	260	0.150119	1	GCF_009858895.2_ASM985889v3_genomic.gff:NC_045512.2	five_prime_UTR	NC_045512.2	SF1
encode_SF1_2	5	+	2	1000	0.611	0.764371	224	0.12536	0.932365	GCF_009858895.2_ASM985889v3_genomic.gff:NC_045512.2	three_prime_UTR	NC_045512.2	SF1
s38	4	+	2	1000	2.572	1.2808	20	1	1	GCF_000850885.1_ViralProj14831_genomic.gff:NC_003908.1	five_prime_UTR	NC_003908.1	HNRNPL	ENSG00000104824
s38	4	+	10	1000	10.562	2.35706	297	1	1	GCF_000850885.1_ViralProj14831_genomic.gff:NC_003908.1	three_prime_UTR	NC_003908.1	HNRNPL	ENSG00000104824
s38	4	+	59	1000	47.1	5.60977	804	0.0834488	1	GCF_000853805.1_ViralProj14948_genomic.gff:NC_004421.1	five_prime_UTR	NC_004421.1	HNRNPL	ENSG00000104824
s38	4	+	10	1000	10.448	2.78659	170	1	1	GCF_000853805.1_ViralProj14948_genomic.gff:NC_004421.1	three_prime_UTR	NC_004421.1	HNRNPL	ENSG00000104824
s38	4	+	7	1000	5.309	1.91708	282	0.381977	1	GCF_000853865.1_ViralProj14960_genomic.gff:NC_005831.2	five_prime_UTR	NC_005831.2	HNRNPL	ENSG00000104824
s38	4	+	10	1000	7.471	2.29225	283	0.348716	1	GCF_000853865.1_ViralProj14960_genomic.gff:NC_005831.2	three_prime_UTR	NC_005831.2	HNRNPL	ENSG00000104824
s38	4	+	1	1000	2.003	1.1876	126	0.727159	1	GCF_000860805.1_ViralProj15370_genomic.gff:NC_003690.1	five_prime_UTR	NC_003690.1	HNRNPL	ENSG00000104824
s38	4	+	48	1000	40.639	5.09535	564	0.222095	1	GCF_000860805.1_ViralProj15370_genomic.gff:NC_003690.1	three_prime_UTR	NC_003690.1	HNRNPL	ENSG00000104824
s38	4	+	4	1000	2.26	1.18144	92	0.292147	1	GCF_000861085.1_ViralProj15431_genomic.gff:NC_001563.2	five_prime_UTR	NC_001563.2	HNRNPL	ENSG00000104824
s38	4	+	49	1000	35.021	4.8882	569	0.0182912	0.659136	GCF_000861085.1_ViralProj15431_genomic.gff:NC_001563.2	three_prime_UTR	NC_001563.2	HNRNPL	ENSG00000104824
s38	4	+	42	1000	37.103	5.1167	738	0.399071	1	GCF_000861165.1_ViralProj15288_genomic.gff:NC_002058.3	five_prime_UTR	NC_002058.3	HNRNPL	ENSG00000104824
s38	4	+	74	1000	64.23	6.75727	1063	0.220734	1	GCF_000861185.1_ViralProj15292_genomic.gff:NC_001366.1	five_prime_UTR	NC_001366.1	HNRNPL	ENSG00000104824
s38	4	+	39	1000	39.282	5.2385	698	1	1	GCF_000861505.1_ViralProj15357_genomic.gff:NC_001897.1	five_prime_UTR	NC_001897.1	HNRNPL	ENSG00000104824
s38	4	+	0	1000	0.777	0.791136	83	1	1	GCF_000861505.1_ViralProj15357_genomic.gff:NC_001897.1	three_prime_UTR	NC_001897.1	HNRNPL	ENSG00000104824
s38	4	+	19	1000	20.134	3.8365	337	0.90845	1	GCF_000861845.1_ViralProj15432_genomic.gff:NC_004102.1	five_prime_UTR	NC_004102.1	HNRNPL	ENSG00000104824
s38	4	+	1	1000	4.234	1.95834	265	0.139017	0.967239	GCF_000861845.1_ViralProj15432_genomic.gff:NC_004102.1	three_prime_UTR	NC_004102.1	HNRNPL	ENSG00000104824
s38	4	+	45	1000	37.979	5.14267	746	0.242894	1	GCF_000861905.1_ViralProj15445_genomic.gff:NC_001612.1	five_prime_UTR	NC_001612.1	HNRNPL	ENSG00000104824
s38	4	+	8	1000	4.499	1.85619	77	0.0899893	1	GCF_000861905.1_ViralProj15445_genomic.gff:NC_001612.1	three_prime_UTR	NC_001612.1	HNRNPL	ENSG00000104824
s38	4	+	7	1000	5.715	1.69902	40	0.501598	1	GCF_000862105.1_ViralProj15302_genomic.gff:NC_001449.1	five_prime_UTR	NC_001449.1	HNRNPL	ENSG00000104824
s38	4	+	0	1000	1.063	0.924059	114	0.631208	1	GCF_000862105.1_ViralProj15302_genomic.gff:NC_001449.1	three_prime_UTR	NC_001449.1	HNRNPL	ENSG00000104824
s38	4	+	0	1000	1.173	0.914279	90	0.635062	1	GCF_000862125.1_ViralProj15306_genomic.gff:NC_001477.1	five_prime_UTR	NC_001477.1	HNRNPL	ENSG00000104824
s38	4	+	34	1000	33.69	4.30609	458	0.92864	1	GCF_000862125.1_ViralProj15306_genomic.gff:NC_001477.1	three_prime_UTR	NC_001477.1	HNRNPL	ENSG00000104824
s38	4	+	0	1000	2.357	1.2219	125	0.181239	1	GCF_000863165.1_ViralProj15343_genomic.gff:NC_001809.1	five_prime_UTR	NC_001809.1	HNRNPL	ENSG00000104824
s38	4	+	41	1000	38.411	4.99931	493	0.673945	1	GCF_000863165.1_ViralProj15343_genomic.gff:NC_001809.1	three_prime_UTR	NC_001809.1	HNRNPL	ENSG00000104824
s38	4	+	1	1000	2.458	1.30612	72	0.522156	1	GCF_000863385.1_ViralProj15392_genomic.gff:NC_003417.1	five_prime_UTR	NC_003417.1	HNRNPL	ENSG00000104824
s38	4	+	0	1000	0.278	0.474279	62	1	1	GCF_000864005.1_ViralProj15520_genomic.gff:NC_001959.2	three_prime_UTR	NC_001959.2	HNRNPL	ENSG00000104824
s38	4	+	2	1000	3.164	1.44333	97	0.773432	1	GCF_000865065.1_ViralProj15599_genomic.gff:NC_002640.1	five_prime_UTR	NC_002640.1	HNRNPL	ENSG00000104824
s38	4	+	32	1000	28.001	4.22432	380	0.431293	1	GCF_000865065.1_ViralProj15599_genomic.gff:NC_002640.1	three_prime_UTR	NC_002640.1	HNRNPL	ENSG00000104824
s38	4	+	0	1000	0.931	0.865441	90	1	1	GCF_000866625.1_ViralProj15598_genomic.gff:NC_001475.2	five_prime_UTR	NC_001475.2	HNRNPL	ENSG00000104824
s38	4	+	30	1000	26.908	4.326	436	0.54945	1	GCF_000866625.1_ViralProj15598_genomic.gff:NC_001475.2	three_prime_UTR	NC_001475.2	HNRNPL	ENSG00000104824
s38	4	+	18	1000	20.348	3.91768	336	0.730749	1	GCF_000871165.1_ViralProj20937_genomic.gff:NC_009823.1	five_prime_UTR	NC_009823.1	HNRNPL	ENSG00000104824
s38	4	+	2	1000	4.817	2.01484	265	0.251551	1	GCF_000871165.1_ViralProj20937_genomic.gff:NC_009823.1	three_prime_UTR	NC_009823.1	HNRNPL	ENSG00000104824
s38	4	+	65	1000	58.096	6.54443	1036	0.344213	1	GCF_000871545.1_ViralProj19577_genomic.gff:NC_009448.2	five_prime_UTR	NC_009448.2	HNRNPL	ENSG00000104824
s38	4	+	4	1000	2.162	1.27882	42	0.168827	1	GCF_000871545.1_ViralProj19577_genomic.gff:NC_009448.2	three_prime_UTR	NC_009448.2	HNRNPL	ENSG00000104824
s38	4	+	2	1000	1.206	0.990224	92	0.340028	1	GCF_000871845.1_ViralProj20183_genomic.gff:NC_001474.2	five_prime_UTR	NC_001474.2	HNRNPL	ENSG00000104824
s38	4	+	28	1000	26.844	4.17338	447	0.765459	1	GCF_000871845.1_ViralProj20183_genomic.gff:NC_001474.2	three_prime_UTR	NC_001474.2	HNRNPL	ENSG00000104824
s38	4	+	19	1000	20.642	3.78816	338	0.820151	1	GCF_000872025.1_ViralProj20939_genomic.gff:NC_009827.1	five_prime_UTR	NC_009827.1	HNRNPL	ENSG00000104824
s38	4	+	2	1000	4.912	2.04412	225	0.251439	1	GCF_000872025.1_ViralProj20939_genomic.gff:NC_009827.1	three_prime_UTR	NC_009827.1	HNRNPL	ENSG00000104824
s38	4	+	14	1000	13.322	3.21973	275	0.778923	1	GCF_000873605.1_ViralProj20935_genomic.gff:NC_009826.1	five_prime_UTR	NC_009826.1	HNRNPL	ENSG00000104824
s38	4	+	1	989	1.03741	0.773823	15	1	1	GCF_000873605.1_ViralProj20935_genomic.gff:NC_009826.1	three_prime_UTR	NC_009826.1	HNRNPL	ENSG00000104824
s38	4	+	13	1000	13.702	3.25481	275	1	1	GCF_000874265.1_ViralProj20933_genomic.gff:NC_009825.1	five_prime_UTR	NC_009825.1	HNRNPL	ENSG00000104824
s38	4	+	1	1000	2.903	1.35256	45	0.366727	1	GCF_000874265.1_ViralProj20933_genomic.gff:NC_009825.1	three_prime_UTR	NC_009825.1	HNRNPL	ENSG00000104824
s38	4	+	19	1000	17.52	3.56038	335	0.711776	1	GCF_000874285.1_ViralProj20941_genomic.gff:NC_009824.1	five_prime_UTR	NC_009824.1	HNRNPL	ENSG00000104824
s38	4	+	0	998	0.965932	0.832418	16	0.620428	1	GCF_000874285.1_ViralProj20941_genomic.gff:NC_009824.1	three_prime_UTR	NC_009824.1	HNRNPL	ENSG00000104824
s38	4	+	0	1000	0.568	0.640145	54	1	1	GCF_000880715.1_ViralProj32327_genomic.gff:NC_011400.1	three_prime_UTR	NC_011400.1	HNRNPL	ENSG00000104824
s38	4	+	3	1000	1.485	0.981192	102	0.186445	1	GCF_000882815.3_ViralProj36615_genomic.gff:NC_012532.1	five_prime_UTR	NC_012532.1	HNRNPL	ENSG00000104824
s38	4	+	36	1000	31.778	4.63165	424	0.407121	1	GCF_000882815.3_ViralProj36615_genomic.gff:NC_012532.1	three_prime_UTR	NC_012532.1	HNRNPL	ENSG00000104824
s38	4	+	59	1000	50.891	5.47532	745	0.244651	1	GCF_000884955.1_ViralProj38499_genomic.gff:NC_012801.1	five_prime_UTR	NC_012801.1	HNRNPL	ENSG00000104824
s38	4	+	1	1000	0.599	0.657747	77	0.451924	1	GCF_000884955.1_ViralProj38499_genomic.gff:NC_012801.1	three_prime_UTR	NC_012801.1	HNRNPL	ENSG00000104824
s38	4	+	63	1000	55.961	6.0236	1160	0.336864	1	GCF_000885595.1_ViralProj38497_genomic.gff:NC_012800.1	five_prime_UTR	NC_012800.1	HNRNPL	ENSG00000104824
s38	4	+	1	1000	0.331	0.530774	89	0.282238	1	GCF_000885595.1_ViralProj38497_genomic.gff:NC_012800.1	three_prime_UTR	NC_012800.1	HNRNPL	ENSG00000104824
s38	4	+	1	1000	0.934	0.717048	34	0.612124	1	GCF_000885815.1_ViralProj39811_genomic.gff:NC_013060.1	five_prime_UTR	NC_013060.1	HNRNPL	ENSG00000104824
s38	4	+	0	1000	1.1	0.942809	94	0.631902	1	GCF_000885815.1_ViralProj39811_genomic.gff:NC_013060.1	three_prime_UTR	NC_013060.1	HNRNPL	ENSG00000104824
s38	4	+	7	1000	6.895	2.05431	134	0.845836	1	GCF_000886455.1_ViralProj38493_genomic.gff:NC_012798.1	five_prime_UTR	NC_012798.1	HNRNPL	ENSG00000104824
s38	4	+	1	1000	1.089	0.88536	78	1	1	GCF_000886455.1_ViralProj38493_genomic.gff:NC_012798.1	three_prime_UTR	NC_012798.1	HNRNPL	ENSG00000104824
s38	4	+	49	1000	37.173	5.09834	743	0.0524242	1	GCF_000886475.1_ViralProj38501_genomic.gff:NC_012802.1	five_prime_UTR	NC_012802.1	HNRNPL	ENSG00000104824
s38	4	+	0	1000	0.953	0.829143	83	1	1	GCF_000886475.1_ViralProj38501_genomic.gff:NC_012802.1	three_prime_UTR	NC_012802.1	HNRNPL	ENSG00000104824
s38	4	+	0	1000	0.197	0.422338	36	1	1	GCF_000897955.1_ViralProj178562_genomic.gff:NC_019027.1	five_prime_UTR	NC_019027.1	HNRNPL	ENSG00000104824
s38	4	+	2	1000	3.304	1.57037	111	0.776224	1	GCF_000897955.1_ViralProj178562_genomic.gff:NC_019027.1	three_prime_UTR	NC_019027.1	HNRNPL	ENSG00000104824
s38	4	+	0	1000	0.074	0.261902	34	1	1	GCF_000899535.1_ViralProj178563_genomic.gff:NC_019028.1	three_prime_UTR	NC_019028.1	HNRNPL	ENSG00000104824
s38	4	+	4	1000	6.043	2.07641	274	0.536805	1	GCF_000901155.1_ViralProj183710_genomic.gff:NC_019843.3	five_prime_UTR	NC_019843.3	HNRNPL	ENSG00000104824
s38	4	+	63	1000	59.101	5.90675	1015	0.591553	1	GCF_000901155.1_ViralProj183710_genomic.gff:NC_019843.3	three_prime_UTR	NC_019843.3	HNRNPL	ENSG00000104824
s38	4	+	1	1000	0.896	0.809839	32	0.596986	1	GCF_000901475.1_ViralProj178564_genomic.gff:NC_019026.1	five_prime_UTR	NC_019026.1	HNRNPL	ENSG00000104824
s38	4	+	2	1000	1.999	1.13943	91	1	1	GCF_000901475.1_ViralProj178564_genomic.gff:NC_019026.1	three_prime_UTR	NC_019026.1	HNRNPL	ENSG00000104824
s38	4	+	6	1000	4.543	1.55518	38	0.450468	1	GCF_000917835.1_ViralProj242273_genomic.gff:NC_023812.1	five_prime_UTR	NC_023812.1	HNRNPL	ENSG00000104824
s38	4	+	8	1000	10.13	2.68669	329	0.631229	1	GCF_000917835.1_ViralProj242273_genomic.gff:NC_023812.1	three_prime_UTR	NC_023812.1	HNRNPL	ENSG00000104824
s38	4	+	29	1000	25.602	4.28041	516	0.477149	1	GCF_000921975.1_ViralProj253339_genomic.gff:NC_024377.1	five_prime_UTR	NC_024377.1	HNRNPL	ENSG00000104824
s38	4	+	22	1000	18.783	3.63884	304	0.405192	1	GCF_000921975.1_ViralProj253339_genomic.gff:NC_024377.1	three_prime_UTR	NC_024377.1	HNRNPL	ENSG00000104824
s38	4	+	16	1000	17.022	3.45796	323	0.90108	1	GCF_001310135.2_ViralProj298087_genomic.gff:NC_027998.2	five_prime_UTR	NC_027998.2	HNRNPL	ENSG00000104824
s38	4	+	33	1000	26.185	4.10946	362	0.185705	1	GCF_001310135.2_ViralProj298087_genomic.gff:NC_027998.2	three_prime_UTR	NC_027998.2	HNRNPL	ENSG00000104824
s38	4	+	20	1000	20.244	3.70543	335	1	1	GCF_001712785.1_ViralProj339556_genomic.gff:NC_030791.1	five_prime_UTR	NC_030791.1	HNRNPL	ENSG00000104824
s38	4	+	0	1000	1.94	1.09891	58	0.268033	1	GCF_001712785.1_ViralProj339556_genomic.gff:NC_030791.1	three_prime_UTR	NC_030791.1	HNRNPL	ENSG00000104824
s38	4	+	12	1000	11.873	2.81403	178	0.88102	1	GCF_002117635.1_ViralProj384965_genomic.gff:NC_034385.1	five_prime_UTR	NC_034385.1	HNRNPL	ENSG00000104824
s38	4	+	2	1000	1.495	0.933191	83	0.66322	1	GCF_002117635.1_ViralProj384965_genomic.gff:NC_034385.1	three_prime_UTR	NC_034385.1	HNRNPL	ENSG00000104824
s38	4	+	51	1000	42.657	5.3956	738	0.180285	1	GCF_002816685.1_ASM281668v1_genomic.gff:NC_038307.1	five_prime_UTR	NC_038307.1	HNRNPL	ENSG00000104824
s38	4	+	4	1000	3.798	1.70649	95	0.792744	1	GCF_002816685.1_ASM281668v1_genomic.gff:NC_038307.1	three_prime_UTR	NC_038307.1	HNRNPL	ENSG00000104824
s38	4	+	45	1000	34.21	5.01468	728	0.0652576	1	GCF_002816725.1_ASM281672v1_genomic.gff:NC_038308.1	five_prime_UTR	NC_038308.1	HNRNPL	ENSG00000104824
s38	4	+	4	1000	4.054	1.45093	64	1	1	GCF_002816725.1_ASM281672v1_genomic.gff:NC_038308.1	three_prime_UTR	NC_038308.1	HNRNPL	ENSG00000104824
s38	4	+	25	1000	24.122	4.17019	441	0.833793	1	GCF_002820785.1_ASM282078v1_genomic.gff:NC_038426.1	five_prime_UTR	NC_038426.1	HNRNPL	ENSG00000104824
s38	4	+	10	1000	8.631	2.16276	99	0.591967	1	GCF_002820785.1_ASM282078v1_genomic.gff:NC_038426.1	three_prime_UTR	NC_038426.1	HNRNPL	ENSG00000104824
s38	4	+	16	1000	17.138	3.5586	325	0.901153	1	GCF_002821385.1_ASM282138v1_genomic.gff:NC_038436.1	five_prime_UTR	NC_038436.1	HNRNPL	ENSG00000104824
s38	4	+	0	1000	2.316	1.25846	31	0.167878	1	GCF_002821385.1_ASM282138v1_genomic.gff:NC_038436.1	three_prime_UTR	NC_038436.1	HNRNPL	ENSG00000104824
s38	4	+	9	1000	9.621	2.4624	261	1	1	GCF_009858895.2_ASM985889v3_genomic.gff:NC_045512.2	five_prime_UTR	NC_045512.2	HNRNPL	ENSG00000104824
s38	4	+	9	1000	10.956	2.71688	225	0.643544	1	GCF_009858895.2_ASM985889v3_genomic.gff:NC_045512.2	three_prime_UTR	NC_045512.2	HNRNPL	ENSG00000104824
1053	5	+	0	1000	0.103	0.307385	19	1	1	GCF_000850885.1_ViralProj14831_genomic.gff:NC_003908.1	five_prime_UTR	NC_003908.1	RBMY1A1	ENSG00000234414
1053	5	+	0	1000	0.289	0.525124	296	1	1	GCF_000850885.1_ViralProj14831_genomic.gff:NC_003908.1	three_prime_UTR	NC_003908.1	RBMY1A1	ENSG00000234414
1053	5	+	2	1000	1.629	1.17078	803	0.680391	1	GCF_000853805.1_ViralProj14948_genomic.gff:NC_004421.1	five_prime_UTR	NC_004421.1	RBMY1A1	ENSG00000234414
1053	5	+	0	1000	0.365	0.571053	169	1	1	GCF_000853805.1_ViralProj14948_genomic.gff:NC_004421.1	three_prime_UTR	NC_004421.1	RBMY1A1	ENSG00000234414
1053	5	+	1	1000	0.394	0.594237	281	0.325832	1	GCF_000853865.1_ViralProj14960_genomic.gff:NC_005831.2	five_prime_UTR	NC_005831.2	RBMY1A1	ENSG00000234414
1053	5	+	0	1000	0.108	0.326255	282	1	1	GCF_000853865.1_ViralProj14960_genomic.gff:NC_005831.2	three_prime_UTR	NC_005831.2	RBMY1A1	ENSG00000234414
1053	5	+	0	1000	0.107	0.31883	125	1	1	GCF_000860805.1_ViralProj15370_genomic.gff:NC_003690.1	five_prime_UTR	NC_003690.1	RBMY1A1	ENSG00000234414
1053	5	+	0	1000	1.021	0.996771	563	0.631874	1	GCF_000860805.1_ViralProj15370_genomic.gff:NC_003690.1	three_prime_UTR	NC_003690.1	RBMY1A1	ENSG00000234414
1053	5	+	0	1000	0.098	0.30081	91	1	1	GCF_000861085.1_ViralProj15431_genomic.gff:NC_001563.2	five_prime_UTR	NC_001563.2	RBMY1A1	ENSG00000234414
1053	5	+	2	1000	0.375	0.595592	568	0.054924	0.967872	GCF_000861085.1_ViralProj15431_genomic.gff:NC_001563.2	three_prime_UTR	NC_001563.2	RBMY1A1	ENSG00000234414
1053	5	+	1	1000	0.622	0.774413	737	0.463271	1	GCF_000861165.1_ViralProj15288_genomic.gff:NC_002058.3	five_prime_UTR	NC_002058.3	RBMY1A1	ENSG00000234414
1053	5	+	0	1000	1.364	1.16656	1062	0.65117	1	GCF_000861185.1_ViralProj15292_genomic.gff:NC_001366.1	five_prime_UTR	NC_001366.1	RBMY1A1	ENSG00000234414
1053	5	+	0	1000	0.815	0.881789	697	1	1	GCF_000861505.1_ViralProj15357_genomic.gff:NC_001897.1	five_prime_UTR	NC_001897.1	RBMY1A1	ENSG00000234414
1053	5	+	0	1000	0.024	0.153126	82	1	1	GCF_000861505.1_ViralProj15357_genomic.gff:NC_001897.1	three_prime_UTR	NC_001897.1	RBMY1A1	ENSG00000234414
1053	5	+	1	1000	0.154	0.387859	336	0.142758	1	GCF_000861845.1_ViralProj15432_genomic.gff:NC_004102.1	five_prime_UTR	NC_004102.1	RBMY1A1	ENSG00000234414
1053	5	+	0	1000	0.091	0.298006	264	1	1	GCF_000861845.1_ViralProj15432_genomic.gff:NC_004102.1	three_prime_UTR	NC_004102.1	RBMY1A1	ENSG00000234414
1053	5	+	0	1000	0.576	0.734005	745	1	1	GCF_000861905.1_ViralProj15445_genomic.gff:NC_001612.1	five_prime_UTR	NC_001612.1	RBMY1A1	ENSG00000234414
1053	5	+	1	1000	0.054	0.230515	76	0.0525861	1	GCF_000861905.1_ViralProj15445_genomic.gff:NC_001612.1	three_prime_UTR	NC_001612.1	RBMY1A1	ENSG00000234414
1053	5	+	0	1000	0.055	0.232441	113	1	1	GCF_000862105.1_ViralProj15302_genomic.gff:NC_001449.1	three_prime_UTR	NC_001449.1	RBMY1A1	ENSG00000234414
1053	5	+	0	1000	0.098	0.313838	89	1	1	GCF_000862125.1_ViralProj15306_genomic.gff:NC_001477.1	five_prime_UTR	NC_001477.1	RBMY1A1	ENSG00000234414
1053	5	+	0	1000	0.673	0.776321	457	1	1	GCF_000862125.1_ViralProj15306_genomic.gff:NC_001477.1	three_prime_UTR	NC_001477.1	RBMY1A1	ENSG00000234414
1053	5	+	0	1000	0.097	0.30608	124	1	1	GCF_000863165.1_ViralProj15343_genomic.gff:NC_001809.1	five_prime_UTR	NC_001809.1	RBMY1A1	ENSG00000234414
1053	5	+	0	1000	0.464	0.682033	492	1	1	GCF_000863165.1_ViralProj15343_genomic.gff:NC_001809.1	three_prime_UTR	NC_001809.1	RBMY1A1	ENSG00000234414
1053	5	+	0	1000	0.226	0.450696	71	1	1	GCF_000863385.1_ViralProj15392_genomic.gff:NC_003417.1	five_prime_UTR	NC_003417.1	RBMY1A1	ENSG00000234414
1053	5	+	0	1000	0.177	0.404765	96	1	1	GCF_000865065.1_ViralProj15599_genomic.gff:NC_002640.1	five_prime_UTR	NC_002640.1	RBMY1A1	ENSG00000234414
1053	5	+	0	1000	0.408	0.622835	379	1	1	GCF_000865065.1_ViralProj15599_genomic.gff:NC_002640.1	three_prime_UTR	NC_002640.1	RBMY1A1	ENSG00000234414
1053	5	+	0	1000	0.039	0.193692	89	1	1	GCF_000866625.1_ViralProj15598_genomic.gff:NC_001475.2	five_prime_UTR	NC_001475.2	RBMY1A1	ENSG00000234414
1053	5	+	0	1000	0.517	0.690063	435	1	1	GCF_000866625.1_ViralProj15598_genomic.gff:NC_001475.2	three_prime_UTR	NC_001475.2	RBMY1A1	ENSG00000234414
1053	5	+	0	1000	0.129	0.366734	335	1	1	GCF_000871165.1_ViralProj20937_genomic.gff:NC_009823.1	five_prime_UTR	NC_009823.1	RBMY1A1	ENSG00000234414
1053	5	+	0	1000	0.091	0.294628	264	1	1	GCF_000871165.1_ViralProj20937_genomic.gff:NC_009823.1	three_prime_UTR	NC_009823.1	RBMY1A1	ENSG00000234414
1053	5	+	0	1000	1.409	1.13181	1035	0.655519	1	GCF_000871545.1_ViralProj19577_genomic.gff:NC_009448.2	five_prime_UTR	NC_009448.2	RBMY1A1	ENSG00000234414
1053	5	+	0	1000	0.104	0.318253	41	1	1	GCF_000871545.1_ViralProj19577_genomic.gff:NC_009448.2	three_prime_UTR	NC_009448.2	RBMY1A1	ENSG00000234414
1053	5	+	1	1000	0.113	0.329149	91	0.106912	1	GCF_000871845.1_ViralProj20183_genomic.gff:NC_001474.2	five_prime_UTR	NC_001474.2	RBMY1A1	ENSG00000234414
1053	5	+	0	1000	0.742	0.78489	446	1	1	GCF_000871845.1_ViralProj20183_genomic.gff:NC_001474.2	three_prime_UTR	NC_001474.2	RBMY1A1	ENSG00000234414
1053	5	+	1	1000	0.176	0.398978	337	0.161421	1	GCF_000872025.1_ViralProj20939_genomic.gff:NC_009827.1	five_prime_UTR	NC_009827.1	RBMY1A1	ENSG00000234414
1053	5	+	0	1000	0.116	0.335644	224	1	1	GCF_000872025.1_ViralProj20939_genomic.gff:NC_009827.1	three_prime_UTR	NC_009827.1	RBMY1A1	ENSG00000234414
1053	5	+	1	1000	0.065	0.250675	274	0.0629398	1	GCF_000873605.1_ViralProj20935_genomic.gff:NC_009826.1	five_prime_UTR	NC_009826.1	RBMY1A1	ENSG00000234414
1053	5	+	0	989	0.0970677	0.2962	14	1	1	GCF_000873605.1_ViralProj20935_genomic.gff:NC_009826.1	three_prime_UTR	NC_009826.1	RBMY1A1	ENSG00000234414
1053	5	+	1	1000	0.084	0.28111	274	0.0805806	1	GCF_000874265.1_ViralProj20933_genomic.gff:NC_009825.1	five_prime_UTR	NC_009825.1	RBMY1A1	ENSG00000234414
1053	5	+	0	1000	0.012	0.10894	44	1	1	GCF_000874265.1_ViralProj20933_genomic.gff:NC_009825.1	three_prime_UTR	NC_009825.1	RBMY1A1	ENSG00000234414
1053	5	+	1	1000	0.193	0.433519	334	0.175564	1	GCF_000874285.1_ViralProj20941_genomic.gff:NC_009824.1	five_prime_UTR	NC_009824.1	RBMY1A1	ENSG00000234414
1053	5	+	0	998	0.0611222	0.239675	15	1	1	GCF_000874285.1_ViralProj20941_genomic.gff:NC_009824.1	three_prime_UTR	NC_009824.1	RBMY1A1	ENSG00000234414
1053	5	+	0	1000	0.036	0.186383	53	1	1	GCF_000880715.1_ViralProj32327_genomic.gff:NC_011400.1	three_prime_UTR	NC_011400.1	RBMY1A1	ENSG00000234414
1053	5	+	0	1000	0.111	0.326781	101	1	1	GCF_000882815.3_ViralProj36615_genomic.gff:NC_012532.1	five_prime_UTR	NC_012532.1	RBMY1A1	ENSG00000234414
1053	5	+	0	1000	0.546	0.743261	423	1	1	GCF_000882815.3_ViralProj36615_genomic.gff:NC_012532.1	three_prime_UTR	NC_012532.1	RBMY1A1	ENSG00000234414
1053	5	+	1	1000	0.626	0.740724	744	0.465414	1	GCF_000884955.1_ViralProj38499_genomic.gff:NC_012801.1	five_prime_UTR	NC_012801.1	RBMY1A1	ENSG00000234414
1053	5	+	0	1000	0.039	0.198793	76	1	1	GCF_000884955.1_ViralProj38499_genomic.gff:NC_012801.1	three_prime_UTR	NC_012801.1	RBMY1A1	ENSG00000234414
1053	5	+	3	1000	1.117	1.01998	1159	0.102944	1	GCF_000885595.1_ViralProj38497_genomic.gff:NC_012800.1	five_prime_UTR	NC_012800.1	RBMY1A1	ENSG00000234414
1053	5	+	0	1000	0.037	0.188856	88	1	1	GCF_000885595.1_ViralProj38497_genomic.gff:NC_012800.1	three_prime_UTR	NC_012800.1	RBMY1A1	ENSG00000234414
1053	5	+	0	1000	0.026	0.159215	33	1	1	GCF_000885815.1_ViralProj39811_genomic.gff:NC_013060.1	five_prime_UTR	NC_013060.1	RBMY1A1	ENSG00000234414
1053	5	+	0	1000	0.05	0.218054	93	1	1	GCF_000885815.1_ViralProj39811_genomic.gff:NC_013060.1	three_prime_UTR	NC_013060.1	RBMY1A1	ENSG00000234414
1053	5	+	0	1000	0.258	0.487518	133	1	1	GCF_000886455.1_ViralProj38493_genomic.gff:NC_012798.1	five_prime_UTR	NC_012798.1	RBMY1A1	ENSG00000234414
1053	5	+	0	1000	0.056	0.230037	77	1	1	GCF_000886455.1_ViralProj38493_genomic.gff:NC_012798.1	three_prime_UTR	NC_012798.1	RBMY1A1	ENSG00000234414
1053	5	+	0	1000	0.737	0.847673	742	1	1	GCF_000886475.1_ViralProj38501_genomic.gff:NC_012802.1	five_prime_UTR	NC_012802.1	RBMY1A1	ENSG00000234414
1053	5	+	0	1000	0.057	0.240435	82	1	1	GCF_000886475.1_ViralProj38501_genomic.gff:NC_012802.1	three_prime_UTR	NC_012802.1	RBMY1A1	ENSG00000234414
1053	5	+	0	1000	0.016	0.125538	34	1	1	GCF_000895575.1_ViralProj76723_genomic.gff:NC_016155.1	three_prime_UTR	NC_016155.1	RBMY1A1	ENSG00000234414
1053	5	+	0	1000	0.006	0.0772656	35	1	1	GCF_000897955.1_ViralProj178562_genomic.gff:NC_019027.1	five_prime_UTR	NC_019027.1	RBMY1A1	ENSG00000234414
1053	5	+	0	1000	0.021	0.143456	110	1	1	GCF_000897955.1_ViralProj178562_genomic.gff:NC_019027.1	three_prime_UTR	NC_019027.1	RBMY1A1	ENSG00000234414
1053	5	+	0	1000	0.05	0.218054	33	1	1	GCF_000899535.1_ViralProj178563_genomic.gff:NC_019028.1	three_prime_UTR	NC_019028.1	RBMY1A1	ENSG00000234414
1053	5	+	1	1000	0.417	0.627299	273	0.341189	1	GCF_000901155.1_ViralProj183710_genomic.gff:NC_019843.3	five_prime_UTR	NC_019843.3	RBMY1A1	ENSG00000234414
1053	5	+	1	1000	2.161	1.43148	1014	0.730727	1	GCF_000901155.1_ViralProj183710_genomic.gff:NC_019843.3	three_prime_UTR	NC_019843.3	RBMY1A1	ENSG00000234414
1053	5	+	0	1000	0.013	0.113331	31	1	1	GCF_000901475.1_ViralProj178564_genomic.gff:NC_019026.1	five_prime_UTR	NC_019026.1	RBMY1A1	ENSG00000234414
1053	5	+	0	1000	0.114	0.333339	90	1	1	GCF_000901475.1_ViralProj178564_genomic.gff:NC_019026.1	three_prime_UTR	NC_019026.1	RBMY1A1	ENSG00000234414
1053	5	+	0	1000	0.026	0.159215	37	1	1	GCF_000917835.1_ViralProj242273_genomic.gff:NC_023812.1	five_prime_UTR	NC_023812.1	RBMY1A1	ENSG00000234414
1053	5	+	0	1000	0.137	0.352641	328	1	1	GCF_000917835.1_ViralProj242273_genomic.gff:NC_023812.1	three_prime_UTR	NC_023812.1	RBMY1A1	ENSG00000234414
1053	5	+	0	1000	0.337	0.572502	515	1	1	GCF_000921975.1_ViralProj253339_genomic.gff:NC_024377.1	five_prime_UTR	NC_024377.1	RBMY1A1	ENSG00000234414
1053	5	+	0	1000	0.208	0.452704	303	1	1	GCF_000921975.1_ViralProj253339_genomic.gff:NC_024377.1	three_prime_UTR	NC_024377.1	RBMY1A1	ENSG00000234414
1053	5	+	0	1000	0.112	0.324902	322	1	1	GCF_001310135.2_ViralProj298087_genomic.gff:NC_027998.2	five_prime_UTR	NC_027998.2	RBMY1A1	ENSG00000234414
1053	5	+	0	1000	0.253	0.505219	361	1	1	GCF_001310135.2_ViralProj298087_genomic.gff:NC_027998.2	three_prime_UTR	NC_027998.2	RBMY1A1	ENSG00000234414
1053	5	+	0	1000	0.118	0.33792	334	1	1	GCF_001712785.1_ViralProj339556_genomic.gff:NC_030791.1	five_prime_UTR	NC_030791.1	RBMY1A1	ENSG00000234414
1053	5	+	0	1000	0.022	0.146757	57	1	1	GCF_001712785.1_ViralProj339556_genomic.gff:NC_030791.1	three_prime_UTR	NC_030791.1	RBMY1A1	ENSG00000234414
1053	5	+	0	1000	0.104	0.318253	177	1	1	GCF_002117635.1_ViralProj384965_genomic.gff:NC_034385.1	five_prime_UTR	NC_034385.1	RBMY1A1	ENSG00000234414
1053	5	+	1	1000	0.592	0.757701	737	0.446912	1	GCF_002816685.1_ASM281668v1_genomic.gff:NC_038307.1	five_prime_UTR	NC_038307.1	RBMY1A1	ENSG00000234414
1053	5	+	0	1000	0.047	0.211745	94	1	1	GCF_002816685.1_ASM281668v1_genomic.gff:NC_038307.1	three_prime_UTR	NC_038307.1	RBMY1A1	ENSG00000234414
1053	5	+	3	1000	0.774	0.858872	727	0.0436672	1	GCF_002816725.1_ASM281672v1_genomic.gff:NC_038308.1	five_prime_UTR	NC_038308.1	RBMY1A1	ENSG00000234414
1053	5	+	0	1000	0.07	0.259166	63	1	1	GCF_002816725.1_ASM281672v1_genomic.gff:NC_038308.1	three_prime_UTR	NC_038308.1	RBMY1A1	ENSG00000234414
1053	5	+	0	1000	0.165	0.407358	440	1	1	GCF_002820785.1_ASM282078v1_genomic.gff:NC_038426.1	five_prime_UTR	NC_038426.1	RBMY1A1	ENSG00000234414
1053	5	+	0	1000	0.002	0.044699	98	1	1	GCF_002820785.1_ASM282078v1_genomic.gff:NC_038426.1	three_prime_UTR	NC_038426.1	RBMY1A1	ENSG00000234414
1053	5	+	0	1000	0.109	0.333512	324	1	1	GCF_002821385.1_ASM282138v1_genomic.gff:NC_038436.1	five_prime_UTR	NC_038436.1	RBMY1A1	ENSG00000234414
1053	5	+	0	1000	0.1	0.30015	30	1	1	GCF_002821385.1_ASM282138v1_genomic.gff:NC_038436.1	three_prime_UTR	NC_038436.1	RBMY1A1	ENSG00000234414
1053	5	+	0	1000	0.576	0.731272	260	1	1	GCF_009858895.2_ASM985889v3_genomic.gff:NC_045512.2	five_prime_UTR	NC_045512.2	RBMY1A1	ENSG00000234414
1053	5	+	0	1000	0.159	0.39481	224	1	1	GCF_009858895.2_ASM985889v3_genomic.gff:NC_045512.2	three_prime_UTR	NC_045512.2	RBMY1A1	ENSG00000234414
1215	8	+	0	1000	0.091	0.291211	16	1	1	GCF_000850885.1_ViralProj14831_genomic.gff:NC_003908.1	five_prime_UTR	NC_003908.1	QKI	ENSG00000112531
1215	8	+	1	1000	0.989	0.954877	293	0.628673	1	GCF_000850885.1_ViralProj14831_genomic.gff:NC_003908.1	three_prime_UTR	NC_003908.1	QKI	ENSG00000112531
1215	8	+	0	1000	0.763	0.859983	800	1	1	GCF_000853805.1_ViralProj14948_genomic.gff:NC_004421.1	five_prime_UTR	NC_004421.1	QKI	ENSG00000112531
1215	8	+	0	1000	0.193	0.426536	166	1	1	GCF_000853805.1_ViralProj14948_genomic.gff:NC_004421.1	three_prime_UTR	NC_004421.1	QKI	ENSG00000112531
1215	8	+	0	1000	0.386	0.59612	278	1	1	GCF_000853865.1_ViralProj14960_genomic.gff:NC_005831.2	five_prime_UTR	NC_005831.2	QKI	ENSG00000112531
1215	8	+	1	1000	0.344	0.569199	279	0.291222	1	GCF_000853865.1_ViralProj14960_genomic.gff:NC_005831.2	three_prime_UTR	NC_005831.2	QKI	ENSG00000112531
1215	8	+	0	1000	0.015	0.121613	122	1	1	GCF_000860805.1_ViralProj15370_genomic.gff:NC_003690.1	five_prime_UTR	NC_003690.1	QKI	ENSG00000112531
1215	8	+	0	1000	0.237	0.470162	560	1	1	GCF_000860805.1_ViralProj15370_genomic.gff:NC_003690.1	three_prime_UTR	NC_003690.1	QKI	ENSG00000112531
1215	8	+	1	1000	0.062	0.265002	88	0.0601377	1	GCF_000861085.1_ViralProj15431_genomic.gff:NC_001563.2	five_prime_UTR	NC_001563.2	QKI	ENSG00000112531
1215	8	+	0	1000	0.448	0.666138	565	1	1	GCF_000861085.1_ViralProj15431_genomic.gff:NC_001563.2	three_prime_UTR	NC_001563.2	QKI	ENSG00000112531
1215	8	+	0	1000	0.701	0.817476	734	1	1	GCF_000861165.1_ViralProj15288_genomic.gff:NC_002058.3	five_prime_UTR	NC_002058.3	QKI	ENSG00000112531
1215	8	+	0	1000	0.813	0.858352	1059	1	1	GCF_000861185.1_ViralProj15292_genomic.gff:NC_001366.1	five_prime_UTR	NC_001366.1	QKI	ENSG00000112531
1215	8	+	0	1000	1.028	0.996096	694	0.631997	1	GCF_000861505.1_ViralProj15357_genomic.gff:NC_001897.1	five_prime_UTR	NC_001897.1	QKI	ENSG00000112531
1215	8	+	2	1000	0.292	0.506945	79	0.0348883	1	GCF_000861505.1_ViralProj15357_genomic.gff:NC_001897.1	three_prime_UTR	NC_001897.1	QKI	ENSG00000112531
1215	8	+	0	1000	0.107	0.328114	333	1	1	GCF_000861845.1_ViralProj15432_genomic.gff:NC_004102.1	five_prime_UTR	NC_004102.1	QKI	ENSG00000112531
1215	8	+	0	1000	0.129	0.347102	261	1	1	GCF_000861845.1_ViralProj15432_genomic.gff:NC_004102.1	three_prime_UTR	NC_004102.1	QKI	ENSG00000112531
1215	8	+	1	1000	0.847	0.874274	742	0.571508	1	GCF_000861905.1_ViralProj15445_genomic.gff:NC_001612.1	five_prime_UTR	NC_001612.1	QKI	ENSG00000112531
1215	8	+	0	1000	0.088	0.286947	73	1	1	GCF_000861905.1_ViralProj15445_genomic.gff:NC_001612.1	three_prime_UTR	NC_001612.1	QKI	ENSG00000112531
1215	8	+	0	1000	0.037	0.188856	36	1	1	GCF_000862105.1_ViralProj15302_genomic.gff:NC_001449.1	five_prime_UTR	NC_001449.1	QKI	ENSG00000112531
1215	8	+	0	1000	0.107	0.315675	110	1	1	GCF_000862105.1_ViralProj15302_genomic.gff:NC_001449.1	three_prime_UTR	NC_001449.1	QKI	ENSG00000112531
1215	8	+	0	1000	0.081	0.276614	86	1	1	GCF_000862125.1_ViralProj15306_genomic.gff:NC_001477.1	five_prime_UTR	NC_001477.1	QKI	ENSG00000112531
1215	8	+	0	1000	0.282	0.51453	454	1	1	GCF_000862125.1_ViralProj15306_genomic.gff:NC_001477.1	three_prime_UTR	NC_001477.1	QKI	ENSG00000112531
1215	8	+	0	1000	0.019	0.136593	121	1	1	GCF_000863165.1_ViralProj15343_genomic.gff:NC_001809.1	five_prime_UTR	NC_001809.1	QKI	ENSG00000112531
1215	8	+	0	1000	0.129	0.349974	489	1	1	GCF_000863165.1_ViralProj15343_genomic.gff:NC_001809.1	three_prime_UTR	NC_001809.1	QKI	ENSG00000112531
1215	8	+	0	1000	0.031	0.179084	68	1	1	GCF_000863385.1_ViralProj15392_genomic.gff:NC_003417.1	five_prime_UTR	NC_003417.1	QKI	ENSG00000112531
1215	8	+	0	1000	0.035	0.183872	58	1	1	GCF_000864005.1_ViralProj15520_genomic.gff:NC_001959.2	three_prime_UTR	NC_001959.2	QKI	ENSG00000112531
1215	8	+	1	1000	0.043	0.202959	93	0.0420981	1	GCF_000865065.1_ViralProj15599_genomic.gff:NC_002640.1	five_prime_UTR	NC_002640.1	QKI	ENSG00000112531
1215	8	+	0	1000	0.231	0.479446	376	1	1	GCF_000865065.1_ViralProj15599_genomic.gff:NC_002640.1	three_prime_UTR	NC_002640.1	QKI	ENSG00000112531
1215	8	+	0	1000	0.06	0.241782	86	1	1	GCF_000866625.1_ViralProj15598_genomic.gff:NC_001475.2	five_prime_UTR	NC_001475.2	QKI	ENSG00000112531
1215	8	+	0	1000	0.209	0.446675	432	1	1	GCF_000866625.1_ViralProj15598_genomic.gff:NC_001475.2	three_prime_UTR	NC_001475.2	QKI	ENSG00000112531
1215	8	+	0	1000	0.164	0.39403	332	1	1	GCF_000871165.1_ViralProj20937_genomic.gff:NC_009823.1	five_prime_UTR	NC_009823.1	QKI	ENSG00000112531
1215	8	+	0	1000	0.227	0.464421	261	1	1	GCF_000871165.1_ViralProj20937_genomic.gff:NC_009823.1	three_prime_UTR	NC_009823.1	QKI	ENSG00000112531
1215	8	+	2	1000	0.756	0.846866	1032	0.175455	1	GCF_000871545.1_ViralProj19577_genomic.gff:NC_009448.2	five_prime_UTR	NC_009448.2	QKI	ENSG00000112531
1215	8	+	0	1000	0.017	0.129336	38	1	1	GCF_000871545.1_ViralProj19577_genomic.gff:NC_009448.2	three_prime_UTR	NC_009448.2	QKI	ENSG00000112531
1215	8	+	0	1000	0.096	0.304757	88	1	1	GCF_000871845.1_ViralProj20183_genomic.gff:NC_001474.2	five_prime_UTR	NC_001474.2	QKI	ENSG00000112531
1215	8	+	1	1000	0.313	0.550758	443	0.268831	1	GCF_000871845.1_ViralProj20183_genomic.gff:NC_001474.2	three_prime_UTR	NC_001474.2	QKI	ENSG00000112531
1215	8	+	0	1000	0.138	0.386141	334	1	1	GCF_000872025.1_ViralProj20939_genomic.gff:NC_009827.1	five_prime_UTR	NC_009827.1	QKI	ENSG00000112531
1215	8	+	1	1000	0.184	0.429335	221	0.168128	1	GCF_000872025.1_ViralProj20939_genomic.gff:NC_009827.1	three_prime_UTR	NC_009827.1	QKI	ENSG00000112531
1215	8	+	0	1000	0.067	0.258026	271	1	1	GCF_000873605.1_ViralProj20935_genomic.gff:NC_009826.1	five_prime_UTR	NC_009826.1	QKI	ENSG00000112531
1215	8	+	0	989	0.0455005	0.208505	11	1	1	GCF_000873605.1_ViralProj20935_genomic.gff:NC_009826.1	three_prime_UTR	NC_009826.1	QKI	ENSG00000112531
1215	8	+	1	1000	0.079	0.280781	271	0.0759707	1	GCF_000874265.1_ViralProj20933_genomic.gff:NC_009825.1	five_prime_UTR	NC_009825.1	QKI	ENSG00000112531
1215	8	+	1	1000	0.14	0.347161	41	0.13085	0.8017	GCF_000874265.1_ViralProj20933_genomic.gff:NC_009825.1	three_prime_UTR	NC_009825.1	QKI	ENSG00000112531
1215	8	+	0	1000	0.121	0.344206	331	1	1	GCF_000874285.1_ViralProj20941_genomic.gff:NC_009824.1	five_prime_UTR	NC_009824.1	QKI	ENSG00000112531
1215	8	+	0	998	0.0360721	0.186563	12	1	1	GCF_000874285.1_ViralProj20941_genomic.gff:NC_009824.1	three_prime_UTR	NC_009824.1	QKI	ENSG00000112531
1215	8	+	0	1000	0.048	0.218503	50	1	1	GCF_000880715.1_ViralProj32327_genomic.gff:NC_011400.1	three_prime_UTR	NC_011400.1	QKI	ENSG00000112531
1215	8	+	0	1000	0.024	0.153126	98	1	1	GCF_000882815.3_ViralProj36615_genomic.gff:NC_012532.1	five_prime_UTR	NC_012532.1	QKI	ENSG00000112531
1215	8	+	0	1000	0.129	0.355648	420	1	1	GCF_000882815.3_ViralProj36615_genomic.gff:NC_012532.1	three_prime_UTR	NC_012532.1	QKI	ENSG00000112531
1215	8	+	0	1000	0.631	0.778103	741	1	1	GCF_000884955.1_ViralProj38499_genomic.gff:NC_012801.1	five_prime_UTR	NC_012801.1	QKI	ENSG00000112531
1215	8	+	0	1000	0.115	0.328455	73	1	1	GCF_000884955.1_ViralProj38499_genomic.gff:NC_012801.1	three_prime_UTR	NC_012801.1	QKI	ENSG00000112531
1215	8	+	2	1000	0.864	0.917794	1156	0.214356	1	GCF_000885595.1_ViralProj38497_genomic.gff:NC_012800.1	five_prime_UTR	NC_012800.1	QKI	ENSG00000112531
1215	8	+	0	1000	0.039	0.203766	85	1	1	GCF_000885595.1_ViralProj38497_genomic.gff:NC_012800.1	three_prime_UTR	NC_012800.1	QKI	ENSG00000112531
1215	8	+	0	1000	0.057	0.231959	90	1	1	GCF_000885815.1_ViralProj39811_genomic.gff:NC_013060.1	three_prime_UTR	NC_013060.1	QKI	ENSG00000112531
1215	8	+	0	1000	0.197	0.434027	130	1	1	GCF_000886455.1_ViralProj38493_genomic.gff:NC_012798.1	five_prime_UTR	NC_012798.1	QKI	ENSG00000112531
1215	8	+	1	1000	0.193	0.412215	74	0.175726	1	GCF_000886455.1_ViralProj38493_genomic.gff:NC_012798.1	three_prime_UTR	NC_012798.1	QKI	ENSG00000112531
1215	8	+	0	1000	0.529	0.720887	739	1	1	GCF_000886475.1_ViralProj38501_genomic.gff:NC_012802.1	five_prime_UTR	NC_012802.1	QKI	ENSG00000112531
1215	8	+	0	1000	0.105	0.313166	79	1	1	GCF_000886475.1_ViralProj38501_genomic.gff:NC_012802.1	three_prime_UTR	NC_012802.1	QKI	ENSG00000112531
1215	8	+	0	1000	0.005	0.070569	31	1	1	GCF_000895575.1_ViralProj76723_genomic.gff:NC_016155.1	three_prime_UTR	NC_016155.1	QKI	ENSG00000112531
1215	8	+	0	1000	0.052	0.2266	107	1	1	GCF_000897955.1_ViralProj178562_genomic.gff:NC_019027.1	three_prime_UTR	NC_019027.1	QKI	ENSG00000112531
1215	8	+	0	1000	0.007	0.0834144	30	1	1	GCF_000899535.1_ViralProj178563_genomic.gff:NC_019028.1	three_prime_UTR	NC_019028.1	QKI	ENSG00000112531
1215	8	+	0	1000	0.303	0.5343	270	1	1	GCF_000901155.1_ViralProj183710_genomic.gff:NC_019843.3	five_prime_UTR	NC_019843.3	QKI	ENSG00000112531
1215	8	+	0	1000	1.034	1.01384	1011	0.632147	1	GCF_000901155.1_ViralProj183710_genomic.gff:NC_019843.3	three_prime_UTR	NC_019843.3	QKI	ENSG00000112531
1215	8	+	0	1000	0.085	0.282586	87	1	1	GCF_000901475.1_ViralProj178564_genomic.gff:NC_019026.1	three_prime_UTR	NC_019026.1	QKI	ENSG00000112531
1215	8	+	0	1000	0.042	0.205617	34	1	1	GCF_000917835.1_ViralProj242273_genomic.gff:NC_023812.1	five_prime_UTR	NC_023812.1	QKI	ENSG00000112531
1215	8	+	0	1000	1.247	1.04742	325	0.641137	1	GCF_000917835.1_ViralProj242273_genomic.gff:NC_023812.1	three_prime_UTR	NC_023812.1	QKI	ENSG00000112531
1215	8	+	0	1000	0.233	0.482643	512	1	1	GCF_000921975.1_ViralProj253339_genomic.gff:NC_024377.1	five_prime_UTR	NC_024377.1	QKI	ENSG00000112531
1215	8	+	0	1000	0.121	0.335368	300	1	1	GCF_000921975.1_ViralProj253339_genomic.gff:NC_024377.1	three_prime_UTR	NC_024377.1	QKI	ENSG00000112531
1215	8	+	0	1000	0.103	0.31383	319	1	1	GCF_001310135.2_ViralProj298087_genomic.gff:NC_027998.2	five_prime_UTR	NC_027998.2	QKI	ENSG00000112531
1215	8	+	0	1000	0.259	0.504156	358	1	1	GCF_001310135.2_ViralProj298087_genomic.gff:NC_027998.2	three_prime_UTR	NC_027998.2	QKI	ENSG00000112531
1215	8	+	0	1000	0.125	0.348563	331	1	1	GCF_001712785.1_ViralProj339556_genomic.gff:NC_030791.1	five_prime_UTR	NC_030791.1	QKI	ENSG00000112531
1215	8	+	0	1000	0.137	0.34979	54	1	1	GCF_001712785.1_ViralProj339556_genomic.gff:NC_030791.1	three_prime_UTR	NC_030791.1	QKI	ENSG00000112531
1215	8	+	0	1000	0.215	0.454953	174	1	1	GCF_002117635.1_ViralProj384965_genomic.gff:NC_034385.1	five_prime_UTR	NC_034385.1	QKI	ENSG00000112531
1215	8	+	0	1000	0.065	0.246649	79	1	1	GCF_002117635.1_ViralProj384965_genomic.gff:NC_034385.1	three_prime_UTR	NC_034385.1	QKI	ENSG00000112531
1215	8	+	1	1000	0.847	0.905766	734	0.571511	1	GCF_002816685.1_ASM281668v1_genomic.gff:NC_038307.1	five_prime_UTR	NC_038307.1	QKI	ENSG00000112531
1215	8	+	1	1000	0.184	0.417514	91	0.168219	1	GCF_002816685.1_ASM281668v1_genomic.gff:NC_038307.1	three_prime_UTR	NC_038307.1	QKI	ENSG00000112531
1215	8	+	2	1000	1.082	1.0307	724	0.294397	1	GCF_002816725.1_ASM281672v1_genomic.gff:NC_038308.1	five_prime_UTR	NC_038308.1	QKI	ENSG00000112531
1215	8	+	0	1000	0.252	0.476154	60	1	1	GCF_002816725.1_ASM281672v1_genomic.gff:NC_038308.1	three_prime_UTR	NC_038308.1	QKI	ENSG00000112531
1215	8	+	0	1000	0.199	0.437711	437	1	1	GCF_002820785.1_ASM282078v1_genomic.gff:NC_038426.1	five_prime_UTR	NC_038426.1	QKI	ENSG00000112531
1215	8	+	1	1000	0.115	0.334495	95	0.108696	0.864265	GCF_002820785.1_ASM282078v1_genomic.gff:NC_038426.1	three_prime_UTR	NC_038426.1	QKI	ENSG00000112531
1215	8	+	0	1000	0.091	0.294628	321	1	1	GCF_002821385.1_ASM282138v1_genomic.gff:NC_038436.1	five_prime_UTR	NC_038436.1	QKI	ENSG00000112531
1215	8	+	0	1000	0.081	0.276614	27	1	1	GCF_002821385.1_ASM282138v1_genomic.gff:NC_038436.1	three_prime_UTR	NC_038436.1	QKI	ENSG00000112531
1215	8	+	0	1000	0.447	0.649317	257	1	1	GCF_009858895.2_ASM985889v3_genomic.gff:NC_045512.2	five_prime_UTR	NC_045512.2	QKI	ENSG00000112531
1215	8	+	0	1000	0.208	0.436952	221	1	1	GCF_009858895.2_ASM985889v3_genomic.gff:NC_045512.2	three_prime_UTR	NC_045512.2	QKI	ENSG00000112531
126	7	+	0	1000	0.065	0.246649	17	1	1	GCF_000850885.1_ViralProj14831_genomic.gff:NC_003908.1	five_prime_UTR	NC_003908.1	SRSF1	ENSG00000136450
126	7	+	0	1000	0.19	0.419614	294	1	1	GCF_000850885.1_ViralProj14831_genomic.gff:NC_003908.1	three_prime_UTR	NC_003908.1	SRSF1	ENSG00000136450
126	7	+	0	1000	1.394	1.19925	801	0.653993	1	GCF_000853805.1_ViralProj14948_genomic.gff:NC_004421.1	five_prime_UTR	NC_004421.1	SRSF1	ENSG00000136450
126	7	+	1	1000	0.227	0.477178	167	0.203202	1	GCF_000853805.1_ViralProj14948_genomic.gff:NC_004421.1	three_prime_UTR	NC_004421.1	SRSF1	ENSG00000136450
126	7	+	0	1000	0.031	0.184589	279	1	1	GCF_000853865.1_ViralProj14960_genomic.gff:NC_005831.2	five_prime_UTR	NC_005831.2	SRSF1	ENSG00000136450
126	7	+	0	1000	0.108	0.335333	280	1	1	GCF_000853865.1_ViralProj14960_genomic.gff:NC_005831.2	three_prime_UTR	NC_005831.2	SRSF1	ENSG00000136450
126	7	+	0	1000	0.108	0.316917	123	1	1	GCF_000860805.1_ViralProj15370_genomic.gff:NC_003690.1	five_prime_UTR	NC_003690.1	SRSF1	ENSG00000136450
126	7	+	3	1000	2.103	1.36244	561	0.472839	1	GCF_000860805.1_ViralProj15370_genomic.gff:NC_003690.1	three_prime_UTR	NC_003690.1	SRSF1	ENSG00000136450
126	7	+	0	1000	0.048	0.223038	89	1	1	GCF_000861085.1_ViralProj15431_genomic.gff:NC_001563.2	five_prime_UTR	NC_001563.2	SRSF1	ENSG00000136450
126	7	+	2	1000	1.683	1.25702	566	0.687125	1	GCF_000861085.1_ViralProj15431_genomic.gff:NC_001563.2	three_prime_UTR	NC_001563.2	SRSF1	ENSG00000136450
126	7	+	1	1000	1.498	1.23512	735	1	1	GCF_000861165.1_ViralProj15288_genomic.gff:NC_002058.3	five_prime_UTR	NC_002058.3	SRSF1	ENSG00000136450
126	7	+	1	1000	2.844	1.62367	1060	0.541101	1	GCF_000861185.1_ViralProj15292_genomic.gff:NC_001366.1	five_prime_UTR	NC_001366.1	SRSF1	ENSG00000136450
126	7	+	3	1000	1.071	1.05881	695	0.0936727	1	GCF_000861505.1_ViralProj15357_genomic.gff:NC_001897.1	five_prime_UTR	NC_001897.1	SRSF1	ENSG00000136450
126	7	+	1	1000	1.198	1.07515	334	1	1	GCF_000861845.1_ViralProj15432_genomic.gff:NC_004102.1	five_prime_UTR	NC_004102.1	SRSF1	ENSG00000136450
126	7	+	0	1000	0.1	0.313206	262	1	1	GCF_000861845.1_ViralProj15432_genomic.gff:NC_004102.1	three_prime_UTR	NC_004102.1	SRSF1	ENSG00000136450
126	7	+	4	1000	1.542	1.18813	743	0.070826	1	GCF_000861905.1_ViralProj15445_genomic.gff:NC_001612.1	five_prime_UTR	NC_001612.1	SRSF1	ENSG00000136450
126	7	+	1	1000	0.088	0.290414	74	0.0842871	1	GCF_000861905.1_ViralProj15445_genomic.gff:NC_001612.1	three_prime_UTR	NC_001612.1	SRSF1	ENSG00000136450
126	7	+	0	1000	0.402	0.608906	37	1	1	GCF_000862105.1_ViralProj15302_genomic.gff:NC_001449.1	five_prime_UTR	NC_001449.1	SRSF1	ENSG00000136450
126	7	+	0	1000	0.06	0.241782	111	1	1	GCF_000862105.1_ViralProj15302_genomic.gff:NC_001449.1	three_prime_UTR	NC_001449.1	SRSF1	ENSG00000136450
126	7	+	0	1000	0.056	0.238581	87	1	1	GCF_000862125.1_ViralProj15306_genomic.gff:NC_001477.1	five_prime_UTR	NC_001477.1	SRSF1	ENSG00000136450
126	7	+	3	1000	1.499	1.19726	455	0.190694	1	GCF_000862125.1_ViralProj15306_genomic.gff:NC_001477.1	three_prime_UTR	NC_001477.1	SRSF1	ENSG00000136450
126	7	+	0	1000	0.178	0.422486	122	1	1	GCF_000863165.1_ViralProj15343_genomic.gff:NC_001809.1	five_prime_UTR	NC_001809.1	SRSF1	ENSG00000136450
126	7	+	4	1000	2.741	1.57111	490	0.358816	1	GCF_000863165.1_ViralProj15343_genomic.gff:NC_001809.1	three_prime_UTR	NC_001809.1	SRSF1	ENSG00000136450
126	7	+	0	1000	0.085	0.296417	69	1	1	GCF_000863385.1_ViralProj15392_genomic.gff:NC_003417.1	five_prime_UTR	NC_003417.1	SRSF1	ENSG00000136450
126	7	+	0	1000	0.042	0.210429	94	1	1	GCF_000865065.1_ViralProj15599_genomic.gff:NC_002640.1	five_prime_UTR	NC_002640.1	SRSF1	ENSG00000136450
126	7	+	4	1000	1.367	1.11605	377	0.049752	1	GCF_000865065.1_ViralProj15599_genomic.gff:NC_002640.1	three_prime_UTR	NC_002640.1	SRSF1	ENSG00000136450
126	7	+	0	1000	0.042	0.205617	87	1	1	GCF_000866625.1_ViralProj15598_genomic.gff:NC_001475.2	five_prime_UTR	NC_001475.2	SRSF1	ENSG00000136450
126	7	+	3	1000	1.325	1.09479	433	0.148441	1	GCF_000866625.1_ViralProj15598_genomic.gff:NC_001475.2	three_prime_UTR	NC_001475.2	SRSF1	ENSG00000136450
126	7	+	1	1000	1.134	1.03688	333	1	1	GCF_000871165.1_ViralProj20937_genomic.gff:NC_009823.1	five_prime_UTR	NC_009823.1	SRSF1	ENSG00000136450
126	7	+	0	1000	0.116	0.335644	262	1	1	GCF_000871165.1_ViralProj20937_genomic.gff:NC_009823.1	three_prime_UTR	NC_009823.1	SRSF1	ENSG00000136450
126	7	+	1	1000	2.64	1.50754	1033	0.531986	1	GCF_000871545.1_ViralProj19577_genomic.gff:NC_009448.2	five_prime_UTR	NC_009448.2	SRSF1	ENSG00000136450
126	7	+	1	1000	0.104	0.318253	39	0.0988999	1	GCF_000871545.1_ViralProj19577_genomic.gff:NC_009448.2	three_prime_UTR	NC_009448.2	SRSF1	ENSG00000136450
126	7	+	0	1000	0.032	0.176088	89	1	1	GCF_000871845.1_ViralProj20183_genomic.gff:NC_001474.2	five_prime_UTR	NC_001474.2	SRSF1	ENSG00000136450
126	7	+	3	1000	1.131	1.01433	444	0.105676	1	GCF_000871845.1_ViralProj20183_genomic.gff:NC_001474.2	three_prime_UTR	NC_001474.2	SRSF1	ENSG00000136450
126	7	+	1	1000	1.346	1.15396	335	1	1	GCF_000872025.1_ViralProj20939_genomic.gff:NC_009827.1	five_prime_UTR	NC_009827.1	SRSF1	ENSG00000136450
126	7	+	0	1000	0.143	0.377748	222	1	1	GCF_000872025.1_ViralProj20939_genomic.gff:NC_009827.1	three_prime_UTR	NC_009827.1	SRSF1	ENSG00000136450
126	7	+	0	1000	0.985	0.940031	272	1	1	GCF_000873605.1_ViralProj20935_genomic.gff:NC_009826.1	five_prime_UTR	NC_009826.1	SRSF1	ENSG00000136450
126	7	+	0	989	0.00202224	0.0449466	12	1	1	GCF_000873605.1_ViralProj20935_genomic.gff:NC_009826.1	three_prime_UTR	NC_009826.1	SRSF1	ENSG00000136450
126	7	+	1	1000	0.93	0.941268	272	0.606075	1	GCF_000874265.1_ViralProj20933_genomic.gff:NC_009825.1	five_prime_UTR	NC_009825.1	SRSF1	ENSG00000136450
126	7	+	0	1000	0.061	0.243595	42	1	1	GCF_000874265.1_ViralProj20933_genomic.gff:NC_009825.1	three_prime_UTR	NC_009825.1	SRSF1	ENSG00000136450
126	7	+	0	1000	1.062	0.984442	332	0.632247	1	GCF_000874285.1_ViralProj20941_genomic.gff:NC_009824.1	five_prime_UTR	NC_009824.1	SRSF1	ENSG00000136450
126	7	+	0	998	0.012024	0.109048	13	1	1	GCF_000874285.1_ViralProj20941_genomic.gff:NC_009824.1	three_prime_UTR	NC_009824.1	SRSF1	ENSG00000136450
126	7	+	0	1000	0.003	0.0547174	51	1	1	GCF_000880715.1_ViralProj32327_genomic.gff:NC_011400.1	three_prime_UTR	NC_011400.1	SRSF1	ENSG00000136450
126	7	+	0	1000	0.032	0.181684	99	1	1	GCF_000882815.3_ViralProj36615_genomic.gff:NC_012532.1	five_prime_UTR	NC_012532.1	SRSF1	ENSG00000136450
126	7	+	4	1000	1.781	1.27226	421	0.105265	1	GCF_000882815.3_ViralProj36615_genomic.gff:NC_012532.1	three_prime_UTR	NC_012532.1	SRSF1	ENSG00000136450
126	7	+	0	1000	1.845	1.30946	742	0.27347	1	GCF_000884955.1_ViralProj38499_genomic.gff:NC_012801.1	five_prime_UTR	NC_012801.1	SRSF1	ENSG00000136450
126	7	+	0	1000	2.112	1.45656	1157	0.284239	1	GCF_000885595.1_ViralProj38497_genomic.gff:NC_012800.1	five_prime_UTR	NC_012800.1	SRSF1	ENSG00000136450
126	7	+	0	1000	0.001	0.0316228	86	1	1	GCF_000885595.1_ViralProj38497_genomic.gff:NC_012800.1	three_prime_UTR	NC_012800.1	SRSF1	ENSG00000136450
126	7	+	0	1000	0.003	0.0547174	31	1	1	GCF_000885815.1_ViralProj39811_genomic.gff:NC_013060.1	five_prime_UTR	NC_013060.1	SRSF1	ENSG00000136450
126	7	+	0	1000	0.021	0.143456	91	1	1	GCF_000885815.1_ViralProj39811_genomic.gff:NC_013060.1	three_prime_UTR	NC_013060.1	SRSF1	ENSG00000136450
126	7	+	0	1000	0.14	0.36405	131	1	1	GCF_000886455.1_ViralProj38493_genomic.gff:NC_012798.1	five_prime_UTR	NC_012798.1	SRSF1	ENSG00000136450
126	7	+	0	1000	0.002	0.044699	75	1	1	GCF_000886455.1_ViralProj38493_genomic.gff:NC_012798.1	three_prime_UTR	NC_012798.1	SRSF1	ENSG00000136450
126	7	+	0	1000	1.407	1.15268	740	0.655264	1	GCF_000886475.1_ViralProj38501_genomic.gff:NC_012802.1	five_prime_UTR	NC_012802.1	SRSF1	ENSG00000136450
126	7	+	0	1000	0.002	0.044699	33	1	1	GCF_000897955.1_ViralProj178562_genomic.gff:NC_019027.1	five_prime_UTR	NC_019027.1	SRSF1	ENSG00000136450
126	7	+	0	1000	0.15	0.376353	108	1	1	GCF_000897955.1_ViralProj178562_genomic.gff:NC_019027.1	three_prime_UTR	NC_019027.1	SRSF1	ENSG00000136450
126	7	+	0	1000	0.079	0.280781	271	1	1	GCF_000901155.1_ViralProj183710_genomic.gff:NC_019843.3	five_prime_UTR	NC_019843.3	SRSF1	ENSG00000136450
126	7	+	0	1000	1.418	1.15525	1012	0.412727	1	GCF_000901155.1_ViralProj183710_genomic.gff:NC_019843.3	three_prime_UTR	NC_019843.3	SRSF1	ENSG00000136450
126	7	+	0	1000	0.011	0.104355	29	1	1	GCF_000901475.1_ViralProj178564_genomic.gff:NC_019026.1	five_prime_UTR	NC_019026.1	SRSF1	ENSG00000136450
126	7	+	0	1000	0.013	0.113331	88	1	1	GCF_000901475.1_ViralProj178564_genomic.gff:NC_019026.1	three_prime_UTR	NC_019026.1	SRSF1	ENSG00000136450
126	7	+	0	1000	0.158	0.37839	35	1	1	GCF_000917835.1_ViralProj242273_genomic.gff:NC_023812.1	five_prime_UTR	NC_023812.1	SRSF1	ENSG00000136450
126	7	+	0	1000	0.166	0.388065	326	1	1	GCF_000917835.1_ViralProj242273_genomic.gff:NC_023812.1	three_prime_UTR	NC_023812.1	SRSF1	ENSG00000136450
126	7	+	1	1000	1.417	1.14386	513	1	1	GCF_000921975.1_ViralProj253339_genomic.gff:NC_024377.1	five_prime_UTR	NC_024377.1	SRSF1	ENSG00000136450
126	7	+	2	1000	1.093	1.01063	301	0.298468	1	GCF_000921975.1_ViralProj253339_genomic.gff:NC_024377.1	three_prime_UTR	NC_024377.1	SRSF1	ENSG00000136450
126	7	+	2	1000	1.083	1.02526	320	0.294793	1	GCF_001310135.2_ViralProj298087_genomic.gff:NC_027998.2	five_prime_UTR	NC_027998.2	SRSF1	ENSG00000136450
126	7	+	1	1000	1.573	1.20504	359	1	1	GCF_001310135.2_ViralProj298087_genomic.gff:NC_027998.2	three_prime_UTR	NC_027998.2	SRSF1	ENSG00000136450
126	7	+	0	1000	1.285	1.09589	332	0.644011	1	GCF_001712785.1_ViralProj339556_genomic.gff:NC_030791.1	five_prime_UTR	NC_030791.1	SRSF1	ENSG00000136450
126	7	+	0	1000	0.012	0.10894	55	1	1	GCF_001712785.1_ViralProj339556_genomic.gff:NC_030791.1	three_prime_UTR	NC_030791.1	SRSF1	ENSG00000136450
126	7	+	2	1000	0.54	0.704909	175	0.102343	1	GCF_002117635.1_ViralProj384965_genomic.gff:NC_034385.1	five_prime_UTR	NC_034385.1	SRSF1	ENSG00000136450
126	7	+	2	1000	1.787	1.31048	735	0.700668	1	GCF_002816685.1_ASM281668v1_genomic.gff:NC_038307.1	five_prime_UTR	NC_038307.1	SRSF1	ENSG00000136450
126	7	+	1	1000	0.119	0.333092	92	0.112261	1	GCF_002816685.1_ASM281668v1_genomic.gff:NC_038307.1	three_prime_UTR	NC_038307.1	SRSF1	ENSG00000136450
126	7	+	0	1000	0.955	0.957022	725	1	1	GCF_002816725.1_ASM281672v1_genomic.gff:NC_038308.1	five_prime_UTR	NC_038308.1	SRSF1	ENSG00000136450
126	7	+	0	1000	0.033	0.184242	61	1	1	GCF_002816725.1_ASM281672v1_genomic.gff:NC_038308.1	three_prime_UTR	NC_038308.1	SRSF1	ENSG00000136450
126	7	+	3	1000	1.398	1.15366	438	0.165786	1	GCF_002820785.1_ASM282078v1_genomic.gff:NC_038426.1	five_prime_UTR	NC_038426.1	SRSF1	ENSG00000136450
126	7	+	0	1000	0.542	0.68169	96	1	1	GCF_002820785.1_ASM282078v1_genomic.gff:NC_038426.1	three_prime_UTR	NC_038426.1	SRSF1	ENSG00000136450
126	7	+	2	1000	1.131	1.06253	322	0.312388	1	GCF_002821385.1_ASM282138v1_genomic.gff:NC_038436.1	five_prime_UTR	NC_038436.1	SRSF1	ENSG00000136450
126	7	+	0	1000	0.029	0.17375	28	1	1	GCF_002821385.1_ASM282138v1_genomic.gff:NC_038436.1	three_prime_UTR	NC_038436.1	SRSF1	ENSG00000136450
126	7	+	1	1000	0.158	0.396476	258	0.146192	1	GCF_009858895.2_ASM985889v3_genomic.gff:NC_045512.2	five_prime_UTR	NC_045512.2	SRSF1	ENSG00000136450
126	7	+	0	1000	0.256	0.514518	222	1	1	GCF_009858895.2_ASM985889v3_genomic.gff:NC_045512.2	three_prime_UTR	NC_045512.2	SRSF1	ENSG00000136450
1334	8	+	0	1000	0.014	0.117549	16	1	1	GCF_000850885.1_ViralProj14831_genomic.gff:NC_003908.1	five_prime_UTR	NC_003908.1	SRSF2	ENSG00000161547
1334	8	+	0	1000	0.111	0.338812	293	1	1	GCF_000850885.1_ViralProj14831_genomic.gff:NC_003908.1	three_prime_UTR	NC_003908.1	SRSF2	ENSG00000161547
1334	8	+	2	1000	0.928	0.920687	800	0.237762	1	GCF_000853805.1_ViralProj14948_genomic.gff:NC_004421.1	five_prime_UTR	NC_004421.1	SRSF2	ENSG00000161547
1334	8	+	0	1000	0.194	0.438813	166	1	1	GCF_000853805.1_ViralProj14948_genomic.gff:NC_004421.1	three_prime_UTR	NC_004421.1	SRSF2	ENSG00000161547
1334	8	+	0	1000	0.085	0.289584	278	1	1	GCF_000853865.1_ViralProj14960_genomic.gff:NC_005831.2	five_prime_UTR	NC_005831.2	SRSF2	ENSG00000161547
1334	8	+	0	1000	0.091	0.301347	279	1	1	GCF_000853865.1_ViralProj14960_genomic.gff:NC_005831.2	three_prime_UTR	NC_005831.2	SRSF2	ENSG00000161547
1334	8	+	0	1000	0.024	0.153126	122	1	1	GCF_000860805.1_ViralProj15370_genomic.gff:NC_003690.1	five_prime_UTR	NC_003690.1	SRSF2	ENSG00000161547
1334	8	+	1	1000	0.858	0.904795	560	0.57627	1	GCF_000860805.1_ViralProj15370_genomic.gff:NC_003690.1	three_prime_UTR	NC_003690.1	SRSF2	ENSG00000161547
1334	8	+	0	1000	0.033	0.184242	88	1	1	GCF_000861085.1_ViralProj15431_genomic.gff:NC_001563.2	five_prime_UTR	NC_001563.2	SRSF2	ENSG00000161547
1334	8	+	0	1000	0.738	0.841465	565	1	1	GCF_000861085.1_ViralProj15431_genomic.gff:NC_001563.2	three_prime_UTR	NC_001563.2	SRSF2	ENSG00000161547
1334	8	+	1	1000	0.867	0.932835	734	0.580005	1	GCF_000861165.1_ViralProj15288_genomic.gff:NC_002058.3	five_prime_UTR	NC_002058.3	SRSF2	ENSG00000161547
1334	8	+	2	1000	1.487	1.18374	1059	0.663743	1	GCF_000861185.1_ViralProj15292_genomic.gff:NC_001366.1	five_prime_UTR	NC_001366.1	SRSF2	ENSG00000161547
1334	8	+	1	1000	0.939	0.936032	694	0.60923	1	GCF_000861505.1_ViralProj15357_genomic.gff:NC_001897.1	five_prime_UTR	NC_001897.1	SRSF2	ENSG00000161547
1334	8	+	0	1000	0.047	0.211745	79	1	1	GCF_000861505.1_ViralProj15357_genomic.gff:NC_001897.1	three_prime_UTR	NC_001897.1	SRSF2	ENSG00000161547
1334	8	+	0	1000	0.748	0.859788	333	1	1	GCF_000861845.1_ViralProj15432_genomic.gff:NC_004102.1	five_prime_UTR	NC_004102.1	SRSF2	ENSG00000161547
1334	8	+	0	1000	0.06	0.237606	261	1	1	GCF_000861845.1_ViralProj15432_genomic.gff:NC_004102.1	three_prime_UTR	NC_004102.1	SRSF2	ENSG00000161547
1334	8	+	2	1000	0.975	0.986584	742	0.255039	1	GCF_000861905.1_ViralProj15445_genomic.gff:NC_001612.1	five_prime_UTR	NC_001612.1	SRSF2	ENSG00000161547
1334	8	+	0	1000	0.133	0.356985	73	1	1	GCF_000861905.1_ViralProj15445_genomic.gff:NC_001612.1	three_prime_UTR	NC_001612.1	SRSF2	ENSG00000161547
1334	8	+	0	1000	0.058	0.23386	36	1	1	GCF_000862105.1_ViralProj15302_genomic.gff:NC_001449.1	five_prime_UTR	NC_001449.1	SRSF2	ENSG00000161547
1334	8	+	0	1000	0.005	0.070569	110	1	1	GCF_000862105.1_ViralProj15302_genomic.gff:NC_001449.1	three_prime_UTR	NC_001449.1	SRSF2	ENSG00000161547
1334	8	+	0	1000	0.02	0.14007	86	1	1	GCF_000862125.1_ViralProj15306_genomic.gff:NC_001477.1	five_prime_UTR	NC_001477.1	SRSF2	ENSG00000161547
1334	8	+	0	1000	0.483	0.645079	454	1	1	GCF_000862125.1_ViralProj15306_genomic.gff:NC_001477.1	three_prime_UTR	NC_001477.1	SRSF2	ENSG00000161547
1334	8	+	0	1000	0.01	0.0995485	121	1	1	GCF_000863165.1_ViralProj15343_genomic.gff:NC_001809.1	five_prime_UTR	NC_001809.1	SRSF2	ENSG00000161547
1334	8	+	1	1000	0.827	0.903265	489	0.562947	1	GCF_000863165.1_ViralProj15343_genomic.gff:NC_001809.1	three_prime_UTR	NC_001809.1	SRSF2	ENSG00000161547
1334	8	+	0	1000	0.042	0.205617	68	1	1	GCF_000863385.1_ViralProj15392_genomic.gff:NC_003417.1	five_prime_UTR	NC_003417.1	SRSF2	ENSG00000161547
1334	8	+	0	1000	0.026	0.159215	93	1	1	GCF_000865065.1_ViralProj15599_genomic.gff:NC_002640.1	five_prime_UTR	NC_002640.1	SRSF2	ENSG00000161547
1334	8	+	0	1000	0.5	0.690273	376	1	1	GCF_000865065.1_ViralProj15599_genomic.gff:NC_002640.1	three_prime_UTR	NC_002640.1	SRSF2	ENSG00000161547
1334	8	+	0	1000	0.033	0.178726	86	1	1	GCF_000866625.1_ViralProj15598_genomic.gff:NC_001475.2	five_prime_UTR	NC_001475.2	SRSF2	ENSG00000161547
1334	8	+	0	1000	0.527	0.722352	432	1	1	GCF_000866625.1_ViralProj15598_genomic.gff:NC_001475.2	three_prime_UTR	NC_001475.2	SRSF2	ENSG00000161547
1334	8	+	0	1000	0.72	0.807621	332	1	1	GCF_000871165.1_ViralProj20937_genomic.gff:NC_009823.1	five_prime_UTR	NC_009823.1	SRSF2	ENSG00000161547
1334	8	+	0	1000	0.047	0.216421	261	1	1	GCF_000871165.1_ViralProj20937_genomic.gff:NC_009823.1	three_prime_UTR	NC_009823.1	SRSF2	ENSG00000161547
1334	8	+	1	1000	1.165	1.01726	1032	1	1	GCF_000871545.1_ViralProj19577_genomic.gff:NC_009448.2	five_prime_UTR	NC_009448.2	SRSF2	ENSG00000161547
1334	8	+	0	1000	0.053	0.224146	38	1	1	GCF_000871545.1_ViralProj19577_genomic.gff:NC_009448.2	three_prime_UTR	NC_009448.2	SRSF2	ENSG00000161547
1334	8	+	0	1000	0.029	0.16789	88	1	1	GCF_000871845.1_ViralProj20183_genomic.gff:NC_001474.2	five_prime_UTR	NC_001474.2	SRSF2	ENSG00000161547
1334	8	+	0	1000	0.445	0.65529	443	1	1	GCF_000871845.1_ViralProj20183_genomic.gff:NC_001474.2	three_prime_UTR	NC_001474.2	SRSF2	ENSG00000161547
1334	8	+	0	1000	0.69	0.797832	334	1	1	GCF_000872025.1_ViralProj20939_genomic.gff:NC_009827.1	five_prime_UTR	NC_009827.1	SRSF2	ENSG00000161547
1334	8	+	0	1000	0.069	0.261357	221	1	1	GCF_000872025.1_ViralProj20939_genomic.gff:NC_009827.1	three_prime_UTR	NC_009827.1	SRSF2	ENSG00000161547
1334	8	+	0	1000	0.519	0.704369	271	1	1	GCF_000873605.1_ViralProj20935_genomic.gff:NC_009826.1	five_prime_UTR	NC_009826.1	SRSF2	ENSG00000161547
1334	8	+	0	989	0.0343782	0.182291	11	1	1	GCF_000873605.1_ViralProj20935_genomic.gff:NC_009826.1	three_prime_UTR	NC_009826.1	SRSF2	ENSG00000161547
1334	8	+	0	1000	0.487	0.669537	271	1	1	GCF_000874265.1_ViralProj20933_genomic.gff:NC_009825.1	five_prime_UTR	NC_009825.1	SRSF2	ENSG00000161547
1334	8	+	0	1000	0.026	0.165382	41	1	1	GCF_000874265.1_ViralProj20933_genomic.gff:NC_009825.1	three_prime_UTR	NC_009825.1	SRSF2	ENSG00000161547
1334	8	+	1	1000	0.612	0.787449	331	0.458042	1	GCF_000874285.1_ViralProj20941_genomic.gff:NC_009824.1	five_prime_UTR	NC_009824.1	SRSF2	ENSG00000161547
1334	8	+	0	998	0.0280561	0.165216	12	1	1	GCF_000874285.1_ViralProj20941_genomic.gff:NC_009824.1	three_prime_UTR	NC_009824.1	SRSF2	ENSG00000161547
1334	8	+	0	1000	0.016	0.125538	98	1	1	GCF_000882815.3_ViralProj36615_genomic.gff:NC_012532.1	five_prime_UTR	NC_012532.1	SRSF2	ENSG00000161547
1334	8	+	0	1000	0.624	0.776677	420	1	1	GCF_000882815.3_ViralProj36615_genomic.gff:NC_012532.1	three_prime_UTR	NC_012532.1	SRSF2	ENSG00000161547
1334	8	+	1	1000	1.054	0.986944	741	1	1	GCF_000884955.1_ViralProj38499_genomic.gff:NC_012801.1	five_prime_UTR	NC_012801.1	SRSF2	ENSG00000161547
1334	8	+	0	1000	0.006	0.0772656	73	1	1	GCF_000884955.1_ViralProj38499_genomic.gff:NC_012801.1	three_prime_UTR	NC_012801.1	SRSF2	ENSG00000161547
1334	8	+	1	1000	1.258	1.08656	1156	1	1	GCF_000885595.1_ViralProj38497_genomic.gff:NC_012800.1	five_prime_UTR	NC_012800.1	SRSF2	ENSG00000161547
1334	8	+	0	1000	0.006	0.0772656	30	1	1	GCF_000885815.1_ViralProj39811_genomic.gff:NC_013060.1	five_prime_UTR	NC_013060.1	SRSF2	ENSG00000161547
1334	8	+	1	1000	0.012	0.10894	90	0.0119291	1	GCF_000885815.1_ViralProj39811_genomic.gff:NC_013060.1	three_prime_UTR	NC_013060.1	SRSF2	ENSG00000161547
1334	8	+	0	1000	0.088	0.290414	130	1	1	GCF_000886455.1_ViralProj38493_genomic.gff:NC_012798.1	five_prime_UTR	NC_012798.1	SRSF2	ENSG00000161547
1334	8	+	0	1000	0.011	0.104355	74	1	1	GCF_000886455.1_ViralProj38493_genomic.gff:NC_012798.1	three_prime_UTR	NC_012798.1	SRSF2	ENSG00000161547
1334	8	+	0	1000	0.891	0.930583	739	1	1	GCF_000886475.1_ViralProj38501_genomic.gff:NC_012802.1	five_prime_UTR	NC_012802.1	SRSF2	ENSG00000161547
1334	8	+	0	1000	0.016	0.125538	79	1	1	GCF_000886475.1_ViralProj38501_genomic.gff:NC_012802.1	three_prime_UTR	NC_012802.1	SRSF2	ENSG00000161547
1334	8	+	0	1000	0.031	0.173404	32	1	1	GCF_000897955.1_ViralProj178562_genomic.gff:NC_019027.1	five_prime_UTR	NC_019027.1	SRSF2	ENSG00000161547
1334	8	+	0	1000	0.122	0.348191	107	1	1	GCF_000897955.1_ViralProj178562_genomic.gff:NC_019027.1	three_prime_UTR	NC_019027.1	SRSF2	ENSG00000161547
1334	8	+	0	1000	0.129	0.366734	270	1	1	GCF_000901155.1_ViralProj183710_genomic.gff:NC_019843.3	five_prime_UTR	NC_019843.3	SRSF2	ENSG00000161547
1334	8	+	0	1000	0.573	0.775417	1011	1	1	GCF_000901155.1_ViralProj183710_genomic.gff:NC_019843.3	three_prime_UTR	NC_019843.3	SRSF2	ENSG00000161547
1334	8	+	0	1000	0.025	0.156203	28	1	1	GCF_000901475.1_ViralProj178564_genomic.gff:NC_019026.1	five_prime_UTR	NC_019026.1	SRSF2	ENSG00000161547
1334	8	+	0	1000	0.003	0.0547174	87	1	1	GCF_000901475.1_ViralProj178564_genomic.gff:NC_019026.1	three_prime_UTR	NC_019026.1	SRSF2	ENSG00000161547
1334	8	+	0	1000	0.124	0.341673	34	1	1	GCF_000917835.1_ViralProj242273_genomic.gff:NC_023812.1	five_prime_UTR	NC_023812.1	SRSF2	ENSG00000161547
1334	8	+	0	1000	0.16	0.393134	325	1	1	GCF_000917835.1_ViralProj242273_genomic.gff:NC_023812.1	three_prime_UTR	NC_023812.1	SRSF2	ENSG00000161547
1334	8	+	0	1000	0.748	0.839763	512	1	1	GCF_000921975.1_ViralProj253339_genomic.gff:NC_024377.1	five_prime_UTR	NC_024377.1	SRSF2	ENSG00000161547
1334	8	+	0	1000	0.587	0.725919	300	1	1	GCF_000921975.1_ViralProj253339_genomic.gff:NC_024377.1	three_prime_UTR	NC_024377.1	SRSF2	ENSG00000161547
1334	8	+	2	1000	0.537	0.724677	319	0.101502	1	GCF_001310135.2_ViralProj298087_genomic.gff:NC_027998.2	five_prime_UTR	NC_027998.2	SRSF2	ENSG00000161547
1334	8	+	1	1000	0.679	0.828641	358	0.493203	1	GCF_001310135.2_ViralProj298087_genomic.gff:NC_027998.2	three_prime_UTR	NC_027998.2	SRSF2	ENSG00000161547
1334	8	+	0	1000	0.719	0.863009	331	1	1	GCF_001712785.1_ViralProj339556_genomic.gff:NC_030791.1	five_prime_UTR	NC_030791.1	SRSF2	ENSG00000161547
1334	8	+	0	1000	0.006	0.0772656	54	1	1	GCF_001712785.1_ViralProj339556_genomic.gff:NC_030791.1	three_prime_UTR	NC_030791.1	SRSF2	ENSG00000161547
1334	8	+	0	1000	0.277	0.522057	174	1	1	GCF_002117635.1_ViralProj384965_genomic.gff:NC_034385.1	five_prime_UTR	NC_034385.1	SRSF2	ENSG00000161547
1334	8	+	1	1000	0.928	0.929344	734	0.604888	1	GCF_002816685.1_ASM281668v1_genomic.gff:NC_038307.1	five_prime_UTR	NC_038307.1	SRSF2	ENSG00000161547
1334	8	+	0	1000	0.079	0.277193	91	1	1	GCF_002816685.1_ASM281668v1_genomic.gff:NC_038307.1	three_prime_UTR	NC_038307.1	SRSF2	ENSG00000161547
1334	8	+	1	1000	0.691	0.817427	724	0.499091	1	GCF_002816725.1_ASM281672v1_genomic.gff:NC_038308.1	five_prime_UTR	NC_038308.1	SRSF2	ENSG00000161547
1334	8	+	0	1000	0.051	0.220108	60	1	1	GCF_002816725.1_ASM281672v1_genomic.gff:NC_038308.1	three_prime_UTR	NC_038308.1	SRSF2	ENSG00000161547
1334	8	+	1	1000	0.89	0.929927	437	0.589717	1	GCF_002820785.1_ASM282078v1_genomic.gff:NC_038426.1	five_prime_UTR	NC_038426.1	SRSF2	ENSG00000161547
1334	8	+	0	1000	0.112	0.327969	95	1	1	GCF_002820785.1_ASM282078v1_genomic.gff:NC_038426.1	three_prime_UTR	NC_038426.1	SRSF2	ENSG00000161547
1334	8	+	2	1000	0.504	0.720071	321	0.0913007	1	GCF_002821385.1_ASM282138v1_genomic.gff:NC_038436.1	five_prime_UTR	NC_038436.1	SRSF2	ENSG00000161547
1334	8	+	0	1000	0.031	0.173404	27	1	1	GCF_002821385.1_ASM282138v1_genomic.gff:NC_038436.1	three_prime_UTR	NC_038436.1	SRSF2	ENSG00000161547
1334	8	+	0	1000	0.138	0.353668	257	1	1	GCF_009858895.2_ASM985889v3_genomic.gff:NC_045512.2	five_prime_UTR	NC_045512.2	SRSF2	ENSG00000161547
1334	8	+	0	1000	0.111	0.332851	221	1	1	GCF_009858895.2_ASM985889v3_genomic.gff:NC_045512.2	three_prime_UTR	NC_045512.2	SRSF2	ENSG00000161547
1343	6	+	0	1000	0.04	0.196057	18	1	1	GCF_000850885.1_ViralProj14831_genomic.gff:NC_003908.1	five_prime_UTR	NC_003908.1	SRSF5	ENSG00000100650
1343	6	+	5	1000	3.241	1.64792	295	0.264397	1	GCF_000850885.1_ViralProj14831_genomic.gff:NC_003908.1	three_prime_UTR	NC_003908.1	SRSF5	ENSG00000100650
1343	6	+	5	1000	3.65	1.85011	802	0.42328	1	GCF_000853805.1_ViralProj14948_genomic.gff:NC_004421.1	five_prime_UTR	NC_004421.1	SRSF5	ENSG00000100650
1343	6	+	0	1000	0.423	0.616807	168	1	1	GCF_000853805.1_ViralProj14948_genomic.gff:NC_004421.1	three_prime_UTR	NC_004421.1	SRSF5	ENSG00000100650
1343	6	+	1	1000	0.846	0.873526	280	0.571421	1	GCF_000853865.1_ViralProj14960_genomic.gff:NC_005831.2	five_prime_UTR	NC_005831.2	SRSF5	ENSG00000100650
1343	6	+	1	1000	1.51	1.12034	281	1	1	GCF_000853865.1_ViralProj14960_genomic.gff:NC_005831.2	three_prime_UTR	NC_005831.2	SRSF5	ENSG00000100650
1343	6	+	0	1000	0.922	0.875604	124	1	1	GCF_000860805.1_ViralProj15370_genomic.gff:NC_003690.1	five_prime_UTR	NC_003690.1	SRSF5	ENSG00000100650
1343	6	+	3	1000	2.412	1.49013	562	0.522826	1	GCF_000860805.1_ViralProj15370_genomic.gff:NC_003690.1	three_prime_UTR	NC_003690.1	SRSF5	ENSG00000100650
1343	6	+	0	1000	0.584	0.698163	90	1	1	GCF_000861085.1_ViralProj15431_genomic.gff:NC_001563.2	five_prime_UTR	NC_001563.2	SRSF5	ENSG00000100650
1343	6	+	7	1000	3.265	1.71631	567	0.0481761	0.967872	GCF_000861085.1_ViralProj15431_genomic.gff:NC_001563.2	three_prime_UTR	NC_001563.2	SRSF5	ENSG00000100650
1343	6	+	3	1000	4.873	2.13434	736	0.644083	1	GCF_000861165.1_ViralProj15288_genomic.gff:NC_002058.3	five_prime_UTR	NC_002058.3	SRSF5	ENSG00000100650
1343	6	+	5	1000	4.619	2.02236	1061	0.812623	1	GCF_000861185.1_ViralProj15292_genomic.gff:NC_001366.1	five_prime_UTR	NC_001366.1	SRSF5	ENSG00000100650
1343	6	+	1	1000	2.603	1.4858	696	0.530716	1	GCF_000861505.1_ViralProj15357_genomic.gff:NC_001897.1	five_prime_UTR	NC_001897.1	SRSF5	ENSG00000100650
1343	6	+	0	1000	0.212	0.437318	81	1	1	GCF_000861505.1_ViralProj15357_genomic.gff:NC_001897.1	three_prime_UTR	NC_001897.1	SRSF5	ENSG00000100650
1343	6	+	3	1000	1.751	1.2151	335	0.256122	1	GCF_000861845.1_ViralProj15432_genomic.gff:NC_004102.1	five_prime_UTR	NC_004102.1	SRSF5	ENSG00000100650
1343	6	+	3	1000	0.387	0.587858	263	0.00718691	0.083269	GCF_000861845.1_ViralProj15432_genomic.gff:NC_004102.1	three_prime_UTR	NC_004102.1	SRSF5	ENSG00000100650
1343	6	+	7	1000	5.18	2.10096	744	0.373598	1	GCF_000861905.1_ViralProj15445_genomic.gff:NC_001612.1	five_prime_UTR	NC_001612.1	SRSF5	ENSG00000100650
1343	6	+	0	1000	0.232	0.467327	75	1	1	GCF_000861905.1_ViralProj15445_genomic.gff:NC_001612.1	three_prime_UTR	NC_001612.1	SRSF5	ENSG00000100650
1343	6	+	0	1000	0.196	0.414434	38	1	1	GCF_000862105.1_ViralProj15302_genomic.gff:NC_001449.1	five_prime_UTR	NC_001449.1	SRSF5	ENSG00000100650
1343	6	+	1	1000	0.679	0.756658	112	0.493923	1	GCF_000862105.1_ViralProj15302_genomic.gff:NC_001449.1	three_prime_UTR	NC_001449.1	SRSF5	ENSG00000100650
1343	6	+	0	1000	0.436	0.616672	88	1	1	GCF_000862125.1_ViralProj15306_genomic.gff:NC_001477.1	five_prime_UTR	NC_001477.1	SRSF5	ENSG00000100650
1343	6	+	3	1000	2.723	1.53578	456	0.756115	1	GCF_000862125.1_ViralProj15306_genomic.gff:NC_001477.1	three_prime_UTR	NC_001477.1	SRSF5	ENSG00000100650
1343	6	+	0	1000	0.915	0.900325	123	1	1	GCF_000863165.1_ViralProj15343_genomic.gff:NC_001809.1	five_prime_UTR	NC_001809.1	SRSF5	ENSG00000100650
1343	6	+	4	1000	2.692	1.54127	491	0.351203	1	GCF_000863165.1_ViralProj15343_genomic.gff:NC_001809.1	three_prime_UTR	NC_001809.1	SRSF5	ENSG00000100650
1343	6	+	0	1000	0.535	0.671734	70	1	1	GCF_000863385.1_ViralProj15392_genomic.gff:NC_003417.1	five_prime_UTR	NC_003417.1	SRSF5	ENSG00000100650
1343	6	+	0	1000	0.082	0.274502	60	1	1	GCF_000864005.1_ViralProj15520_genomic.gff:NC_001959.2	three_prime_UTR	NC_001959.2	SRSF5	ENSG00000100650
1343	6	+	0	1000	0.32	0.536552	95	1	1	GCF_000865065.1_ViralProj15599_genomic.gff:NC_002640.1	five_prime_UTR	NC_002640.1	SRSF5	ENSG00000100650
1343	6	+	3	1000	2.448	1.47901	378	0.740298	1	GCF_000865065.1_ViralProj15599_genomic.gff:NC_002640.1	three_prime_UTR	NC_002640.1	SRSF5	ENSG00000100650
1343	6	+	0	1000	0.573	0.70368	88	1	1	GCF_000866625.1_ViralProj15598_genomic.gff:NC_001475.2	five_prime_UTR	NC_001475.2	SRSF5	ENSG00000100650
1343	6	+	3	1000	2.354	1.37134	434	0.512863	1	GCF_000866625.1_ViralProj15598_genomic.gff:NC_001475.2	three_prime_UTR	NC_001475.2	SRSF5	ENSG00000100650
1343	6	+	3	1000	1.774	1.16803	334	0.262265	1	GCF_000871165.1_ViralProj20937_genomic.gff:NC_009823.1	five_prime_UTR	NC_009823.1	SRSF5	ENSG00000100650
1343	6	+	3	1000	0.795	0.832868	263	0.0464459	0.382895	GCF_000871165.1_ViralProj20937_genomic.gff:NC_009823.1	three_prime_UTR	NC_009823.1	SRSF5	ENSG00000100650
1343	6	+	8	1000	4.164	1.92687	1034	0.0765358	1	GCF_000871545.1_ViralProj19577_genomic.gff:NC_009448.2	five_prime_UTR	NC_009448.2	SRSF5	ENSG00000100650
1343	6	+	0	1000	0.304	0.521398	40	1	1	GCF_000871545.1_ViralProj19577_genomic.gff:NC_009448.2	three_prime_UTR	NC_009448.2	SRSF5	ENSG00000100650
1343	6	+	0	1000	0.426	0.617175	90	1	1	GCF_000871845.1_ViralProj20183_genomic.gff:NC_001474.2	five_prime_UTR	NC_001474.2	SRSF5	ENSG00000100650
1343	6	+	4	1000	2.274	1.40103	445	0.297314	1	GCF_000871845.1_ViralProj20183_genomic.gff:NC_001474.2	three_prime_UTR	NC_001474.2	SRSF5	ENSG00000100650
1343	6	+	3	1000	1.987	1.30251	336	0.456093	1	GCF_000872025.1_ViralProj20939_genomic.gff:NC_009827.1	five_prime_UTR	NC_009827.1	SRSF5	ENSG00000100650
1343	6	+	2	1000	0.743	0.793461	223	0.170729	1	GCF_000872025.1_ViralProj20939_genomic.gff:NC_009827.1	three_prime_UTR	NC_009827.1	SRSF5	ENSG00000100650
1343	6	+	2	1000	1.466	1.10909	273	0.661093	1	GCF_000873605.1_ViralProj20935_genomic.gff:NC_009826.1	five_prime_UTR	NC_009826.1	SRSF5	ENSG00000100650
1343	6	+	0	989	0.00202224	0.0449466	13	1	1	GCF_000873605.1_ViralProj20935_genomic.gff:NC_009826.1	three_prime_UTR	NC_009826.1	SRSF5	ENSG00000100650
1343	6	+	2	1000	1.544	1.16766	273	0.669892	1	GCF_000874265.1_ViralProj20933_genomic.gff:NC_009825.1	five_prime_UTR	NC_009825.1	SRSF5	ENSG00000100650
1343	6	+	0	1000	0.051	0.220108	43	1	1	GCF_000874265.1_ViralProj20933_genomic.gff:NC_009825.1	three_prime_UTR	NC_009825.1	SRSF5	ENSG00000100650
1343	6	+	3	1000	1.885	1.34446	333	0.443161	1	GCF_000874285.1_ViralProj20941_genomic.gff:NC_009824.1	five_prime_UTR	NC_009824.1	SRSF5	ENSG00000100650
1343	6	+	0	998	0.0581162	0.23408	14	1	1	GCF_000874285.1_ViralProj20941_genomic.gff:NC_009824.1	three_prime_UTR	NC_009824.1	SRSF5	ENSG00000100650
1343	6	+	0	1000	0.22	0.44022	52	1	1	GCF_000880715.1_ViralProj32327_genomic.gff:NC_011400.1	three_prime_UTR	NC_011400.1	SRSF5	ENSG00000100650
1343	6	+	0	1000	0.457	0.623329	100	1	1	GCF_000882815.3_ViralProj36615_genomic.gff:NC_012532.1	five_prime_UTR	NC_012532.1	SRSF5	ENSG00000100650
1343	6	+	3	1000	2.019	1.35517	422	0.460624	1	GCF_000882815.3_ViralProj36615_genomic.gff:NC_012532.1	three_prime_UTR	NC_012532.1	SRSF5	ENSG00000100650
1343	6	+	2	1000	3.045	1.61728	743	0.77558	1	GCF_000884955.1_ViralProj38499_genomic.gff:NC_012801.1	five_prime_UTR	NC_012801.1	SRSF5	ENSG00000100650
1343	6	+	0	1000	0.105	0.309953	75	1	1	GCF_000884955.1_ViralProj38499_genomic.gff:NC_012801.1	three_prime_UTR	NC_012801.1	SRSF5	ENSG00000100650
1343	6	+	4	1000	6.434	2.32875	1158	0.430503	1	GCF_000885595.1_ViralProj38497_genomic.gff:NC_012800.1	five_prime_UTR	NC_012800.1	SRSF5	ENSG00000100650
1343	6	+	0	1000	0.144	0.359713	87	1	1	GCF_000885595.1_ViralProj38497_genomic.gff:NC_012800.1	three_prime_UTR	NC_012800.1	SRSF5	ENSG00000100650
1343	6	+	0	1000	0.041	0.198389	32	1	1	GCF_000885815.1_ViralProj39811_genomic.gff:NC_013060.1	five_prime_UTR	NC_013060.1	SRSF5	ENSG00000100650
1343	6	+	1	1000	0.345	0.564175	92	0.292239	1	GCF_000885815.1_ViralProj39811_genomic.gff:NC_013060.1	three_prime_UTR	NC_013060.1	SRSF5	ENSG00000100650
1343	6	+	1	1000	0.687	0.757367	132	0.497819	1	GCF_000886455.1_ViralProj38493_genomic.gff:NC_012798.1	five_prime_UTR	NC_012798.1	SRSF5	ENSG00000100650
1343	6	+	0	1000	0.225	0.461072	76	1	1	GCF_000886455.1_ViralProj38493_genomic.gff:NC_012798.1	three_prime_UTR	NC_012798.1	SRSF5	ENSG00000100650
1343	6	+	4	1000	3.626	1.72252	741	0.788093	1	GCF_000886475.1_ViralProj38501_genomic.gff:NC_012802.1	five_prime_UTR	NC_012802.1	SRSF5	ENSG00000100650
1343	6	+	0	1000	0.217	0.454001	81	1	1	GCF_000886475.1_ViralProj38501_genomic.gff:NC_012802.1	three_prime_UTR	NC_012802.1	SRSF5	ENSG00000100650
1343	6	+	0	1000	0.013	0.113331	34	1	1	GCF_000897955.1_ViralProj178562_genomic.gff:NC_019027.1	five_prime_UTR	NC_019027.1	SRSF5	ENSG00000100650
1343	6	+	0	1000	0.384	0.583853	109	1	1	GCF_000897955.1_ViralProj178562_genomic.gff:NC_019027.1	three_prime_UTR	NC_019027.1	SRSF5	ENSG00000100650
1343	6	+	3	1000	1.836	1.23476	272	0.437351	1	GCF_000901155.1_ViralProj183710_genomic.gff:NC_019843.3	five_prime_UTR	NC_019843.3	SRSF5	ENSG00000100650
1343	6	+	6	1000	4.966	2.07633	1013	0.647203	1	GCF_000901155.1_ViralProj183710_genomic.gff:NC_019843.3	three_prime_UTR	NC_019843.3	SRSF5	ENSG00000100650
1343	6	+	0	1000	0.035	0.183872	30	1	1	GCF_000901475.1_ViralProj178564_genomic.gff:NC_019026.1	five_prime_UTR	NC_019026.1	SRSF5	ENSG00000100650
1343	6	+	2	1000	0.341	0.535729	89	0.0461623	1	GCF_000901475.1_ViralProj178564_genomic.gff:NC_019026.1	three_prime_UTR	NC_019026.1	SRSF5	ENSG00000100650
1343	6	+	0	1000	0.168	0.381997	36	1	1	GCF_000917835.1_ViralProj242273_genomic.gff:NC_023812.1	five_prime_UTR	NC_023812.1	SRSF5	ENSG00000100650
1343	6	+	4	1000	3.2	1.57876	327	0.567491	1	GCF_000917835.1_ViralProj242273_genomic.gff:NC_023812.1	three_prime_UTR	NC_023812.1	SRSF5	ENSG00000100650
1343	6	+	4	1000	2.833	1.64067	514	0.373686	1	GCF_000921975.1_ViralProj253339_genomic.gff:NC_024377.1	five_prime_UTR	NC_024377.1	SRSF5	ENSG00000100650
1343	6	+	2	1000	2.161	1.37221	302	1	1	GCF_000921975.1_ViralProj253339_genomic.gff:NC_024377.1	three_prime_UTR	NC_024377.1	SRSF5	ENSG00000100650
1343	6	+	3	1000	2.912	1.60837	321	0.769072	1	GCF_001310135.2_ViralProj298087_genomic.gff:NC_027998.2	five_prime_UTR	NC_027998.2	SRSF5	ENSG00000100650
1343	6	+	3	1000	2.895	1.60828	360	0.767883	1	GCF_001310135.2_ViralProj298087_genomic.gff:NC_027998.2	three_prime_UTR	NC_027998.2	SRSF5	ENSG00000100650
1343	6	+	3	1000	1.891	1.26757	333	0.443875	1	GCF_001712785.1_ViralProj339556_genomic.gff:NC_030791.1	five_prime_UTR	NC_030791.1	SRSF5	ENSG00000100650
1343	6	+	0	1000	0.061	0.23945	56	1	1	GCF_001712785.1_ViralProj339556_genomic.gff:NC_030791.1	three_prime_UTR	NC_030791.1	SRSF5	ENSG00000100650
1343	6	+	1	1000	0.643	0.770808	176	0.474906	1	GCF_002117635.1_ViralProj384965_genomic.gff:NC_034385.1	five_prime_UTR	NC_034385.1	SRSF5	ENSG00000100650
1343	6	+	0	1000	0.323	0.530049	81	1	1	GCF_002117635.1_ViralProj384965_genomic.gff:NC_034385.1	three_prime_UTR	NC_034385.1	SRSF5	ENSG00000100650
1343	6	+	6	1000	5.346	2.12056	736	0.663468	1	GCF_002816685.1_ASM281668v1_genomic.gff:NC_038307.1	five_prime_UTR	NC_038307.1	SRSF5	ENSG00000100650
1343	6	+	0	1000	0.529	0.669034	93	1	1	GCF_002816685.1_ASM281668v1_genomic.gff:NC_038307.1	three_prime_UTR	NC_038307.1	SRSF5	ENSG00000100650
1343	6	+	3	1000	4.002	1.85187	726	0.804093	1	GCF_002816725.1_ASM281672v1_genomic.gff:NC_038308.1	five_prime_UTR	NC_038308.1	SRSF5	ENSG00000100650
1343	6	+	0	1000	0.068	0.263525	62	1	1	GCF_002816725.1_ASM281672v1_genomic.gff:NC_038308.1	three_prime_UTR	NC_038308.1	SRSF5	ENSG00000100650
1343	6	+	2	1000	2.915	1.60884	439	1	1	GCF_002820785.1_ASM282078v1_genomic.gff:NC_038426.1	five_prime_UTR	NC_038426.1	SRSF5	ENSG00000100650
1343	6	+	0	1000	0.274	0.484932	97	1	1	GCF_002820785.1_ASM282078v1_genomic.gff:NC_038426.1	three_prime_UTR	NC_038426.1	SRSF5	ENSG00000100650
1343	6	+	3	1000	3.022	1.54399	323	1	1	GCF_002821385.1_ASM282138v1_genomic.gff:NC_038436.1	five_prime_UTR	NC_038436.1	SRSF5	ENSG00000100650
1343	6	+	0	1000	0.191	0.413146	29	1	1	GCF_002821385.1_ASM282138v1_genomic.gff:NC_038436.1	three_prime_UTR	NC_038436.1	SRSF5	ENSG00000100650
1343	6	+	2	1000	1.904	1.30249	259	0.71626	1	GCF_009858895.2_ASM985889v3_genomic.gff:NC_045512.2	five_prime_UTR	NC_045512.2	SRSF5	ENSG00000100650
1343	6	+	1	1000	0.578	0.743282	223	0.439402	1	GCF_009858895.2_ASM985889v3_genomic.gff:NC_045512.2	three_prime_UTR	NC_045512.2	SRSF5	ENSG00000100650
1384	7	+	0	1000	0.013	0.113331	17	1	1	GCF_000850885.1_ViralProj14831_genomic.gff:NC_003908.1	five_prime_UTR	NC_003908.1	SRSF6	ENSG00000124193
1384	7	+	0	1000	0.578	0.736518	294	1	1	GCF_000850885.1_ViralProj14831_genomic.gff:NC_003908.1	three_prime_UTR	NC_003908.1	SRSF6	ENSG00000124193
1384	7	+	5	1000	2.81	1.60202	801	0.213465	1	GCF_000853805.1_ViralProj14948_genomic.gff:NC_004421.1	five_prime_UTR	NC_004421.1	SRSF6	ENSG00000124193
1384	7	+	1	1000	0.622	0.730513	167	0.463753	1	GCF_000853805.1_ViralProj14948_genomic.gff:NC_004421.1	three_prime_UTR	NC_004421.1	SRSF6	ENSG00000124193
1384	7	+	0	1000	0.377	0.614205	279	1	1	GCF_000853865.1_ViralProj14960_genomic.gff:NC_005831.2	five_prime_UTR	NC_005831.2	SRSF6	ENSG00000124193
1384	7	+	0	1000	0.202	0.430559	280	1	1	GCF_000853865.1_ViralProj14960_genomic.gff:NC_005831.2	three_prime_UTR	NC_005831.2	SRSF6	ENSG00000124193
1384	7	+	0	1000	0.099	0.298811	123	1	1	GCF_000860805.1_ViralProj15370_genomic.gff:NC_003690.1	five_prime_UTR	NC_003690.1	SRSF6	ENSG00000124193
1384	7	+	1	1000	1.387	1.14041	561	1	1	GCF_000860805.1_ViralProj15370_genomic.gff:NC_003690.1	three_prime_UTR	NC_003690.1	SRSF6	ENSG00000124193
1384	7	+	0	1000	0.1	0.309994	89	1	1	GCF_000861085.1_ViralProj15431_genomic.gff:NC_001563.2	five_prime_UTR	NC_001563.2	SRSF6	ENSG00000124193
1384	7	+	1	1000	0.764	0.853834	566	0.534441	1	GCF_000861085.1_ViralProj15431_genomic.gff:NC_001563.2	three_prime_UTR	NC_001563.2	SRSF6	ENSG00000124193
1384	7	+	0	1000	1.313	1.06309	735	0.646571	1	GCF_000861165.1_ViralProj15288_genomic.gff:NC_002058.3	five_prime_UTR	NC_002058.3	SRSF6	ENSG00000124193
1384	7	+	1	1000	2.475	1.54005	1060	0.52907	1	GCF_000861185.1_ViralProj15292_genomic.gff:NC_001366.1	five_prime_UTR	NC_001366.1	SRSF6	ENSG00000124193
1384	7	+	1	1000	1.332	1.12474	695	1	1	GCF_000861505.1_ViralProj15357_genomic.gff:NC_001897.1	five_prime_UTR	NC_001897.1	SRSF6	ENSG00000124193
1384	7	+	0	1000	0.122	0.353894	80	1	1	GCF_000861505.1_ViralProj15357_genomic.gff:NC_001897.1	three_prime_UTR	NC_001897.1	SRSF6	ENSG00000124193
1384	7	+	1	1000	0.469	0.691026	334	0.374579	1	GCF_000861845.1_ViralProj15432_genomic.gff:NC_004102.1	five_prime_UTR	NC_004102.1	SRSF6	ENSG00000124193
1384	7	+	0	1000	0.628	0.722591	262	1	1	GCF_000861845.1_ViralProj15432_genomic.gff:NC_004102.1	three_prime_UTR	NC_004102.1	SRSF6	ENSG00000124193
1384	7	+	3	1000	1.648	1.28754	743	0.229015	1	GCF_000861905.1_ViralProj15445_genomic.gff:NC_001612.1	five_prime_UTR	NC_001612.1	SRSF6	ENSG00000124193
1384	7	+	0	1000	0.092	0.299375	74	1	1	GCF_000861905.1_ViralProj15445_genomic.gff:NC_001612.1	three_prime_UTR	NC_001612.1	SRSF6	ENSG00000124193
1384	7	+	0	1000	0.017	0.129336	37	1	1	GCF_000862105.1_ViralProj15302_genomic.gff:NC_001449.1	five_prime_UTR	NC_001449.1	SRSF6	ENSG00000124193
1384	7	+	0	1000	0.087	0.281976	111	1	1	GCF_000862105.1_ViralProj15302_genomic.gff:NC_001449.1	three_prime_UTR	NC_001449.1	SRSF6	ENSG00000124193
1384	7	+	0	1000	0.224	0.460474	87	1	1	GCF_000862125.1_ViralProj15306_genomic.gff:NC_001477.1	five_prime_UTR	NC_001477.1	SRSF6	ENSG00000124193
1384	7	+	0	1000	0.558	0.723297	455	1	1	GCF_000862125.1_ViralProj15306_genomic.gff:NC_001477.1	three_prime_UTR	NC_001477.1	SRSF6	ENSG00000124193
1384	7	+	0	1000	0.27	0.487173	122	1	1	GCF_000863165.1_ViralProj15343_genomic.gff:NC_001809.1	five_prime_UTR	NC_001809.1	SRSF6	ENSG00000124193
1384	7	+	1	1000	0.887	0.920368	490	0.588441	1	GCF_000863165.1_ViralProj15343_genomic.gff:NC_001809.1	three_prime_UTR	NC_001809.1	SRSF6	ENSG00000124193
1384	7	+	0	1000	0.352	0.571334	69	1	1	GCF_000863385.1_ViralProj15392_genomic.gff:NC_003417.1	five_prime_UTR	NC_003417.1	SRSF6	ENSG00000124193
1384	7	+	0	1000	0.014	0.117549	59	1	1	GCF_000864005.1_ViralProj15520_genomic.gff:NC_001959.2	three_prime_UTR	NC_001959.2	SRSF6	ENSG00000124193
1384	7	+	1	1000	0.16	0.388008	94	0.147972	1	GCF_000865065.1_ViralProj15599_genomic.gff:NC_002640.1	five_prime_UTR	NC_002640.1	SRSF6	ENSG00000124193
1384	7	+	0	1000	0.572	0.71367	377	1	1	GCF_000865065.1_ViralProj15599_genomic.gff:NC_002640.1	three_prime_UTR	NC_002640.1	SRSF6	ENSG00000124193
1384	7	+	0	1000	0.185	0.406128	87	1	1	GCF_000866625.1_ViralProj15598_genomic.gff:NC_001475.2	five_prime_UTR	NC_001475.2	SRSF6	ENSG00000124193
1384	7	+	0	1000	0.55	0.71555	433	1	1	GCF_000866625.1_ViralProj15598_genomic.gff:NC_001475.2	three_prime_UTR	NC_001475.2	SRSF6	ENSG00000124193
1384	7	+	1	1000	0.451	0.641881	333	0.363204	1	GCF_000871165.1_ViralProj20937_genomic.gff:NC_009823.1	five_prime_UTR	NC_009823.1	SRSF6	ENSG00000124193
1384	7	+	0	1000	0.58	0.734942	262	1	1	GCF_000871165.1_ViralProj20937_genomic.gff:NC_009823.1	three_prime_UTR	NC_009823.1	SRSF6	ENSG00000124193
1384	7	+	3	1000	2.103	1.38286	1033	0.473035	1	GCF_000871545.1_ViralProj19577_genomic.gff:NC_009448.2	five_prime_UTR	NC_009448.2	SRSF6	ENSG00000124193
1384	7	+	1	1000	0.16	0.374887	39	0.148137	1	GCF_000871545.1_ViralProj19577_genomic.gff:NC_009448.2	three_prime_UTR	NC_009448.2	SRSF6	ENSG00000124193
1384	7	+	0	1000	0.205	0.425624	89	1	1	GCF_000871845.1_ViralProj20183_genomic.gff:NC_001474.2	five_prime_UTR	NC_001474.2	SRSF6	ENSG00000124193
1384	7	+	0	1000	0.512	0.678466	444	1	1	GCF_000871845.1_ViralProj20183_genomic.gff:NC_001474.2	three_prime_UTR	NC_001474.2	SRSF6	ENSG00000124193
1384	7	+	1	1000	0.504	0.708863	335	0.39612	1	GCF_000872025.1_ViralProj20939_genomic.gff:NC_009827.1	five_prime_UTR	NC_009827.1	SRSF6	ENSG00000124193
1384	7	+	0	1000	0.449	0.638598	222	1	1	GCF_000872025.1_ViralProj20939_genomic.gff:NC_009827.1	three_prime_UTR	NC_009827.1	SRSF6	ENSG00000124193
1384	7	+	0	1000	0.249	0.493196	272	1	1	GCF_000873605.1_ViralProj20935_genomic.gff:NC_009826.1	five_prime_UTR	NC_009826.1	SRSF6	ENSG00000124193
1384	7	+	0	989	0.107179	0.309497	12	1	1	GCF_000873605.1_ViralProj20935_genomic.gff:NC_009826.1	three_prime_UTR	NC_009826.1	SRSF6	ENSG00000124193
1384	7	+	0	1000	0.27	0.503342	272	1	1	GCF_000874265.1_ViralProj20933_genomic.gff:NC_009825.1	five_prime_UTR	NC_009825.1	SRSF6	ENSG00000124193
1384	7	+	0	1000	0.161	0.381083	42	1	1	GCF_000874265.1_ViralProj20933_genomic.gff:NC_009825.1	three_prime_UTR	NC_009825.1	SRSF6	ENSG00000124193
1384	7	+	1	1000	0.553	0.731934	332	0.425044	1	GCF_000874285.1_ViralProj20941_genomic.gff:NC_009824.1	five_prime_UTR	NC_009824.1	SRSF6	ENSG00000124193
1384	7	+	0	998	0.0641283	0.245104	13	1	1	GCF_000874285.1_ViralProj20941_genomic.gff:NC_009824.1	three_prime_UTR	NC_009824.1	SRSF6	ENSG00000124193
1384	7	+	1	1000	0.214	0.443171	99	0.192839	1	GCF_000882815.3_ViralProj36615_genomic.gff:NC_012532.1	five_prime_UTR	NC_012532.1	SRSF6	ENSG00000124193
1384	7	+	0	1000	0.694	0.819167	421	1	1	GCF_000882815.3_ViralProj36615_genomic.gff:NC_012532.1	three_prime_UTR	NC_012532.1	SRSF6	ENSG00000124193
1384	7	+	4	1000	1.655	1.22616	742	0.0863579	0.97512	GCF_000884955.1_ViralProj38499_genomic.gff:NC_012801.1	five_prime_UTR	NC_012801.1	SRSF6	ENSG00000124193
1384	7	+	0	1000	0.051	0.220108	74	1	1	GCF_000884955.1_ViralProj38499_genomic.gff:NC_012801.1	three_prime_UTR	NC_012801.1	SRSF6	ENSG00000124193
1384	7	+	3	1000	2.811	1.66314	1157	0.762238	1	GCF_000885595.1_ViralProj38497_genomic.gff:NC_012800.1	five_prime_UTR	NC_012800.1	SRSF6	ENSG00000124193
1384	7	+	0	1000	0.068	0.251872	86	1	1	GCF_000885595.1_ViralProj38497_genomic.gff:NC_012800.1	three_prime_UTR	NC_012800.1	SRSF6	ENSG00000124193
1384	7	+	0	1000	0.028	0.165055	31	1	1	GCF_000885815.1_ViralProj39811_genomic.gff:NC_013060.1	five_prime_UTR	NC_013060.1	SRSF6	ENSG00000124193
1384	7	+	0	1000	0.037	0.194084	91	1	1	GCF_000885815.1_ViralProj39811_genomic.gff:NC_013060.1	three_prime_UTR	NC_013060.1	SRSF6	ENSG00000124193
1384	7	+	1	1000	0.379	0.594738	131	0.31583	1	GCF_000886455.1_ViralProj38493_genomic.gff:NC_012798.1	five_prime_UTR	NC_012798.1	SRSF6	ENSG00000124193
1384	7	+	0	1000	0.245	0.474553	75	1	1	GCF_000886455.1_ViralProj38493_genomic.gff:NC_012798.1	three_prime_UTR	NC_012798.1	SRSF6	ENSG00000124193
1384	7	+	4	1000	1.938	1.31601	740	0.131622	1	GCF_000886475.1_ViralProj38501_genomic.gff:NC_012802.1	five_prime_UTR	NC_012802.1	SRSF6	ENSG00000124193
1384	7	+	0	1000	0.145	0.366209	80	1	1	GCF_000886475.1_ViralProj38501_genomic.gff:NC_012802.1	three_prime_UTR	NC_012802.1	SRSF6	ENSG00000124193
1384	7	+	0	1000	0.111	0.314289	32	1	1	GCF_000895575.1_ViralProj76723_genomic.gff:NC_016155.1	three_prime_UTR	NC_016155.1	SRSF6	ENSG00000124193
1384	7	+	0	1000	0.028	0.165055	33	1	1	GCF_000897955.1_ViralProj178562_genomic.gff:NC_019027.1	five_prime_UTR	NC_019027.1	SRSF6	ENSG00000124193
1384	7	+	0	1000	0.065	0.246649	108	1	1	GCF_000897955.1_ViralProj178562_genomic.gff:NC_019027.1	three_prime_UTR	NC_019027.1	SRSF6	ENSG00000124193
1384	7	+	0	1000	0.228	0.433825	31	1	1	GCF_000899535.1_ViralProj178563_genomic.gff:NC_019028.1	three_prime_UTR	NC_019028.1	SRSF6	ENSG00000124193
1384	7	+	0	1000	0.74	0.790585	271	1	1	GCF_000901155.1_ViralProj183710_genomic.gff:NC_019843.3	five_prime_UTR	NC_019843.3	SRSF6	ENSG00000124193
1384	7	+	0	1000	1.241	1.13411	1012	0.641066	1	GCF_000901155.1_ViralProj183710_genomic.gff:NC_019843.3	three_prime_UTR	NC_019843.3	SRSF6	ENSG00000124193
1384	7	+	0	1000	0.031	0.173404	29	1	1	GCF_000901475.1_ViralProj178564_genomic.gff:NC_019026.1	five_prime_UTR	NC_019026.1	SRSF6	ENSG00000124193
1384	7	+	0	1000	0.09	0.293234	88	1	1	GCF_000901475.1_ViralProj178564_genomic.gff:NC_019026.1	three_prime_UTR	NC_019026.1	SRSF6	ENSG00000124193
1384	7	+	0	1000	0.036	0.191679	35	1	1	GCF_000917835.1_ViralProj242273_genomic.gff:NC_023812.1	five_prime_UTR	NC_023812.1	SRSF6	ENSG00000124193
1384	7	+	4	1000	0.406	0.611177	326	0.000808025	0.212137	GCF_000917835.1_ViralProj242273_genomic.gff:NC_023812.1	three_prime_UTR	NC_023812.1	SRSF6	ENSG00000124193
1384	7	+	1	1000	0.719	0.857189	513	0.513006	1	GCF_000921975.1_ViralProj253339_genomic.gff:NC_024377.1	five_prime_UTR	NC_024377.1	SRSF6	ENSG00000124193
1384	7	+	0	1000	0.366	0.579983	301	1	1	GCF_000921975.1_ViralProj253339_genomic.gff:NC_024377.1	three_prime_UTR	NC_024377.1	SRSF6	ENSG00000124193
1384	7	+	0	1000	0.491	0.668106	320	1	1	GCF_001310135.2_ViralProj298087_genomic.gff:NC_027998.2	five_prime_UTR	NC_027998.2	SRSF6	ENSG00000124193
1384	7	+	0	1000	0.749	0.825033	359	1	1	GCF_001310135.2_ViralProj298087_genomic.gff:NC_027998.2	three_prime_UTR	NC_027998.2	SRSF6	ENSG00000124193
1384	7	+	1	1000	0.543	0.707567	332	0.419256	1	GCF_001712785.1_ViralProj339556_genomic.gff:NC_030791.1	five_prime_UTR	NC_030791.1	SRSF6	ENSG00000124193
1384	7	+	0	1000	0.098	0.30081	55	1	1	GCF_001712785.1_ViralProj339556_genomic.gff:NC_030791.1	three_prime_UTR	NC_030791.1	SRSF6	ENSG00000124193
1384	7	+	0	1000	0.408	0.641832	175	1	1	GCF_002117635.1_ViralProj384965_genomic.gff:NC_034385.1	five_prime_UTR	NC_034385.1	SRSF6	ENSG00000124193
1384	7	+	0	1000	0.105	0.316346	80	1	1	GCF_002117635.1_ViralProj384965_genomic.gff:NC_034385.1	three_prime_UTR	NC_034385.1	SRSF6	ENSG00000124193
1384	7	+	1	1000	1.349	1.11375	735	1	1	GCF_002816685.1_ASM281668v1_genomic.gff:NC_038307.1	five_prime_UTR	NC_038307.1	SRSF6	ENSG00000124193
1384	7	+	0	1000	0.102	0.31256	92	1	1	GCF_002816685.1_ASM281668v1_genomic.gff:NC_038307.1	three_prime_UTR	NC_038307.1	SRSF6	ENSG00000124193
1384	7	+	1	1000	1.295	1.10689	725	1	1	GCF_002816725.1_ASM281672v1_genomic.gff:NC_038308.1	five_prime_UTR	NC_038308.1	SRSF6	ENSG00000124193
1384	7	+	0	1000	0.16	0.39058	61	1	1	GCF_002816725.1_ASM281672v1_genomic.gff:NC_038308.1	three_prime_UTR	NC_038308.1	SRSF6	ENSG00000124193
1384	7	+	0	1000	1.102	0.972904	438	0.633495	1	GCF_002820785.1_ASM282078v1_genomic.gff:NC_038426.1	five_prime_UTR	NC_038426.1	SRSF6	ENSG00000124193
1384	7	+	0	1000	0.077	0.281336	96	1	1	GCF_002820785.1_ASM282078v1_genomic.gff:NC_038426.1	three_prime_UTR	NC_038426.1	SRSF6	ENSG00000124193
1384	7	+	0	1000	0.516	0.676906	322	1	1	GCF_002821385.1_ASM282138v1_genomic.gff:NC_038436.1	five_prime_UTR	NC_038436.1	SRSF6	ENSG00000124193
1384	7	+	0	1000	0.061	0.23945	28	1	1	GCF_002821385.1_ASM282138v1_genomic.gff:NC_038436.1	three_prime_UTR	NC_038436.1	SRSF6	ENSG00000124193
1384	7	+	1	1000	0.786	0.858453	258	0.544883	1	GCF_009858895.2_ASM985889v3_genomic.gff:NC_045512.2	five_prime_UTR	NC_045512.2	SRSF6	ENSG00000124193
1384	7	+	0	1000	0.11	0.322497	222	1	1	GCF_009858895.2_ASM985889v3_genomic.gff:NC_045512.2	three_prime_UTR	NC_045512.2	SRSF6	ENSG00000124193
1393	7	+	0	1000	0.007	0.0834144	17	1	1	GCF_000850885.1_ViralProj14831_genomic.gff:NC_003908.1	five_prime_UTR	NC_003908.1	SRSF1	ENSG00000136450
1393	7	+	0	1000	0.319	0.539936	294	1	1	GCF_000850885.1_ViralProj14831_genomic.gff:NC_003908.1	three_prime_UTR	NC_003908.1	SRSF1	ENSG00000136450
1393	7	+	1	1000	1.022	0.997251	801	1	1	GCF_000853805.1_ViralProj14948_genomic.gff:NC_004421.1	five_prime_UTR	NC_004421.1	SRSF1	ENSG00000136450
1393	7	+	0	1000	0.085	0.29302	167	1	1	GCF_000853805.1_ViralProj14948_genomic.gff:NC_004421.1	three_prime_UTR	NC_004421.1	SRSF1	ENSG00000136450
1393	7	+	0	1000	0.052	0.2266	279	1	1	GCF_000853865.1_ViralProj14960_genomic.gff:NC_005831.2	five_prime_UTR	NC_005831.2	SRSF1	ENSG00000136450
1393	7	+	0	1000	0.137	0.382593	280	1	1	GCF_000853865.1_ViralProj14960_genomic.gff:NC_005831.2	three_prime_UTR	NC_005831.2	SRSF1	ENSG00000136450
1393	7	+	0	1000	0.169	0.398243	123	1	1	GCF_000860805.1_ViralProj15370_genomic.gff:NC_003690.1	five_prime_UTR	NC_003690.1	SRSF1	ENSG00000136450
1393	7	+	1	1000	1.299	1.12733	561	1	1	GCF_000860805.1_ViralProj15370_genomic.gff:NC_003690.1	three_prime_UTR	NC_003690.1	SRSF1	ENSG00000136450
1393	7	+	0	1000	0.1	0.303467	89	1	1	GCF_000861085.1_ViralProj15431_genomic.gff:NC_001563.2	five_prime_UTR	NC_001563.2	SRSF1	ENSG00000136450
1393	7	+	2	1000	1.082	1.04133	566	0.294403	1	GCF_000861085.1_ViralProj15431_genomic.gff:NC_001563.2	three_prime_UTR	NC_001563.2	SRSF1	ENSG00000136450
1393	7	+	1	1000	1.177	1.0931	735	1	1	GCF_000861165.1_ViralProj15288_genomic.gff:NC_002058.3	five_prime_UTR	NC_002058.3	SRSF1	ENSG00000136450
1393	7	+	2	1000	1.699	1.26095	1060	0.689235	1	GCF_000861185.1_ViralProj15292_genomic.gff:NC_001366.1	five_prime_UTR	NC_001366.1	SRSF1	ENSG00000136450
1393	7	+	3	1000	0.555	0.729045	695	0.0188523	1	GCF_000861505.1_ViralProj15357_genomic.gff:NC_001897.1	five_prime_UTR	NC_001897.1	SRSF1	ENSG00000136450
1393	7	+	0	1000	0.002	0.044699	80	1	1	GCF_000861505.1_ViralProj15357_genomic.gff:NC_001897.1	three_prime_UTR	NC_001897.1	SRSF1	ENSG00000136450
1393	7	+	1	1000	0.797	0.895876	334	0.54975	1	GCF_000861845.1_ViralProj15432_genomic.gff:NC_004102.1	five_prime_UTR	NC_004102.1	SRSF1	ENSG00000136450
1393	7	+	0	1000	0.088	0.293841	262	1	1	GCF_000861845.1_ViralProj15432_genomic.gff:NC_004102.1	three_prime_UTR	NC_004102.1	SRSF1	ENSG00000136450
1393	7	+	2	1000	1.192	1.04701	743	0.334535	1	GCF_000861905.1_ViralProj15445_genomic.gff:NC_001612.1	five_prime_UTR	NC_001612.1	SRSF1	ENSG00000136450
1393	7	+	0	1000	0.051	0.220108	74	1	1	GCF_000861905.1_ViralProj15445_genomic.gff:NC_001612.1	three_prime_UTR	NC_001612.1	SRSF1	ENSG00000136450
1393	7	+	0	1000	0.094	0.305381	37	1	1	GCF_000862105.1_ViralProj15302_genomic.gff:NC_001449.1	five_prime_UTR	NC_001449.1	SRSF1	ENSG00000136450
1393	7	+	0	1000	0.044	0.210019	111	1	1	GCF_000862105.1_ViralProj15302_genomic.gff:NC_001449.1	three_prime_UTR	NC_001449.1	SRSF1	ENSG00000136450
1393	7	+	0	1000	0.1	0.306748	87	1	1	GCF_000862125.1_ViralProj15306_genomic.gff:NC_001477.1	five_prime_UTR	NC_001477.1	SRSF1	ENSG00000136450
1393	7	+	0	1000	0.766	0.840208	455	1	1	GCF_000862125.1_ViralProj15306_genomic.gff:NC_001477.1	three_prime_UTR	NC_001477.1	SRSF1	ENSG00000136450
1393	7	+	1	1000	0.286	0.518143	122	0.24899	1	GCF_000863165.1_ViralProj15343_genomic.gff:NC_001809.1	five_prime_UTR	NC_001809.1	SRSF1	ENSG00000136450
1393	7	+	1	1000	1.518	1.15543	490	1	1	GCF_000863165.1_ViralProj15343_genomic.gff:NC_001809.1	three_prime_UTR	NC_001809.1	SRSF1	ENSG00000136450
1393	7	+	1	1000	0.112	0.324902	69	0.106037	1	GCF_000863385.1_ViralProj15392_genomic.gff:NC_003417.1	five_prime_UTR	NC_003417.1	SRSF1	ENSG00000136450
1393	7	+	0	1000	0.116	0.332648	94	1	1	GCF_000865065.1_ViralProj15599_genomic.gff:NC_002640.1	five_prime_UTR	NC_002640.1	SRSF1	ENSG00000136450
1393	7	+	0	1000	0.688	0.813214	377	1	1	GCF_000865065.1_ViralProj15599_genomic.gff:NC_002640.1	three_prime_UTR	NC_002640.1	SRSF1	ENSG00000136450
1393	7	+	0	1000	0.117	0.327747	87	1	1	GCF_000866625.1_ViralProj15598_genomic.gff:NC_001475.2	five_prime_UTR	NC_001475.2	SRSF1	ENSG00000136450
1393	7	+	0	1000	0.849	0.885993	433	1	1	GCF_000866625.1_ViralProj15598_genomic.gff:NC_001475.2	three_prime_UTR	NC_001475.2	SRSF1	ENSG00000136450
1393	7	+	1	1000	0.68	0.783718	333	0.493735	1	GCF_000871165.1_ViralProj20937_genomic.gff:NC_009823.1	five_prime_UTR	NC_009823.1	SRSF1	ENSG00000136450
1393	7	+	0	1000	0.142	0.371448	262	1	1	GCF_000871165.1_ViralProj20937_genomic.gff:NC_009823.1	three_prime_UTR	NC_009823.1	SRSF1	ENSG00000136450
1393	7	+	4	1000	1.51	1.2163	1033	0.0667656	1	GCF_000871545.1_ViralProj19577_genomic.gff:NC_009448.2	five_prime_UTR	NC_009448.2	SRSF1	ENSG00000136450
1393	7	+	0	1000	0.1	0.309994	39	1	1	GCF_000871545.1_ViralProj19577_genomic.gff:NC_009448.2	three_prime_UTR	NC_009448.2	SRSF1	ENSG00000136450
1393	7	+	0	1000	0.103	0.31383	89	1	1	GCF_000871845.1_ViralProj20183_genomic.gff:NC_001474.2	five_prime_UTR	NC_001474.2	SRSF1	ENSG00000136450
1393	7	+	0	1000	0.604	0.765356	444	1	1	GCF_000871845.1_ViralProj20183_genomic.gff:NC_001474.2	three_prime_UTR	NC_001474.2	SRSF1	ENSG00000136450
1393	7	+	1	1000	0.899	0.948524	335	0.593515	1	GCF_000872025.1_ViralProj20939_genomic.gff:NC_009827.1	five_prime_UTR	NC_009827.1	SRSF1	ENSG00000136450
1393	7	+	0	1000	0.14	0.366789	222	1	1	GCF_000872025.1_ViralProj20939_genomic.gff:NC_009827.1	three_prime_UTR	NC_009827.1	SRSF1	ENSG00000136450
1393	7	+	1	1000	0.792	0.849387	272	0.547585	1	GCF_000873605.1_ViralProj20935_genomic.gff:NC_009826.1	five_prime_UTR	NC_009826.1	SRSF1	ENSG00000136450
1393	7	+	1	1000	0.839	0.860127	272	0.568418	1	GCF_000874265.1_ViralProj20933_genomic.gff:NC_009825.1	five_prime_UTR	NC_009825.1	SRSF1	ENSG00000136450
1393	7	+	0	1000	0.032	0.176088	42	1	1	GCF_000874265.1_ViralProj20933_genomic.gff:NC_009825.1	three_prime_UTR	NC_009825.1	SRSF1	ENSG00000136450
1393	7	+	1	1000	0.911	0.905483	332	0.598381	1	GCF_000874285.1_ViralProj20941_genomic.gff:NC_009824.1	five_prime_UTR	NC_009824.1	SRSF1	ENSG00000136450
1393	7	+	0	998	0.0190381	0.136727	13	1	1	GCF_000874285.1_ViralProj20941_genomic.gff:NC_009824.1	three_prime_UTR	NC_009824.1	SRSF1	ENSG00000136450
1393	7	+	0	1000	0.159	0.389706	99	1	1	GCF_000882815.3_ViralProj36615_genomic.gff:NC_012532.1	five_prime_UTR	NC_012532.1	SRSF1	ENSG00000136450
1393	7	+	2	1000	0.927	0.943696	421	0.237381	1	GCF_000882815.3_ViralProj36615_genomic.gff:NC_012532.1	three_prime_UTR	NC_012532.1	SRSF1	ENSG00000136450
1393	7	+	3	1000	1.09	1.03294	742	0.0974444	1	GCF_000884955.1_ViralProj38499_genomic.gff:NC_012801.1	five_prime_UTR	NC_012801.1	SRSF1	ENSG00000136450
1393	7	+	0	1000	1.599	1.20318	1157	0.418187	1	GCF_000885595.1_ViralProj38497_genomic.gff:NC_012800.1	five_prime_UTR	NC_012800.1	SRSF1	ENSG00000136450
1393	7	+	0	1000	0.004	0.0631505	86	1	1	GCF_000885595.1_ViralProj38497_genomic.gff:NC_012800.1	three_prime_UTR	NC_012800.1	SRSF1	ENSG00000136450
1393	7	+	0	1000	0.001	0.0316228	31	1	1	GCF_000885815.1_ViralProj39811_genomic.gff:NC_013060.1	five_prime_UTR	NC_013060.1	SRSF1	ENSG00000136450
1393	7	+	0	1000	0.033	0.184242	91	1	1	GCF_000885815.1_ViralProj39811_genomic.gff:NC_013060.1	three_prime_UTR	NC_013060.1	SRSF1	ENSG00000136450
1393	7	+	2	1000	0.11	0.328646	131	0.00558725	0.693256	GCF_000886455.1_ViralProj38493_genomic.gff:NC_012798.1	five_prime_UTR	NC_012798.1	SRSF1	ENSG00000136450
1393	7	+	0	1000	0.017	0.129336	75	1	1	GCF_000886455.1_ViralProj38493_genomic.gff:NC_012798.1	three_prime_UTR	NC_012798.1	SRSF1	ENSG00000136450
1393	7	+	1	1000	1.018	0.987244	740	1	1	GCF_000886475.1_ViralProj38501_genomic.gff:NC_012802.1	five_prime_UTR	NC_012802.1	SRSF1	ENSG00000136450
1393	7	+	0	1000	0.007	0.0834144	80	1	1	GCF_000886475.1_ViralProj38501_genomic.gff:NC_012802.1	three_prime_UTR	NC_012802.1	SRSF1	ENSG00000136450
1393	7	+	0	984	0.0264228	0.16047	7	1	1	GCF_000895575.1_ViralProj76723_genomic.gff:NC_016155.1	five_prime_UTR	NC_016155.1	SRSF1	ENSG00000136450
1393	7	+	0	1000	0.012	0.10894	32	1	1	GCF_000895575.1_ViralProj76723_genomic.gff:NC_016155.1	three_prime_UTR	NC_016155.1	SRSF1	ENSG00000136450
1393	7	+	0	1000	0.113	0.341097	108	1	1	GCF_000897955.1_ViralProj178562_genomic.gff:NC_019027.1	three_prime_UTR	NC_019027.1	SRSF1	ENSG00000136450
1393	7	+	0	984	0.0264228	0.16047	7	1	1	GCF_000899535.1_ViralProj178563_genomic.gff:NC_019028.1	five_prime_UTR	NC_019028.1	SRSF1	ENSG00000136450
1393	7	+	0	1000	0.04	0.196057	31	1	1	GCF_000899535.1_ViralProj178563_genomic.gff:NC_019028.1	three_prime_UTR	NC_019028.1	SRSF1	ENSG00000136450
1393	7	+	0	1000	0.201	0.45914	271	1	1	GCF_000901155.1_ViralProj183710_genomic.gff:NC_019843.3	five_prime_UTR	NC_019843.3	SRSF1	ENSG00000136450
1393	7	+	1	1000	0.67	0.806071	1012	0.488405	1	GCF_000901155.1_ViralProj183710_genomic.gff:NC_019843.3	three_prime_UTR	NC_019843.3	SRSF1	ENSG00000136450
1393	7	+	0	1000	0.015	0.121613	29	1	1	GCF_000901475.1_ViralProj178564_genomic.gff:NC_019026.1	five_prime_UTR	NC_019026.1	SRSF1	ENSG00000136450
1393	7	+	0	1000	0.032	0.181684	88	1	1	GCF_000901475.1_ViralProj178564_genomic.gff:NC_019026.1	three_prime_UTR	NC_019026.1	SRSF1	ENSG00000136450
1393	7	+	1	1000	0.031	0.184589	35	0.0305377	1	GCF_000917835.1_ViralProj242273_genomic.gff:NC_023812.1	five_prime_UTR	NC_023812.1	SRSF1	ENSG00000136450
1393	7	+	0	1000	0.165	0.402414	326	1	1	GCF_000917835.1_ViralProj242273_genomic.gff:NC_023812.1	three_prime_UTR	NC_023812.1	SRSF1	ENSG00000136450
1393	7	+	3	1000	1.286	1.1142	513	0.139471	1	GCF_000921975.1_ViralProj253339_genomic.gff:NC_024377.1	five_prime_UTR	NC_024377.1	SRSF1	ENSG00000136450
1393	7	+	0	1000	0.887	0.899467	301	1	1	GCF_000921975.1_ViralProj253339_genomic.gff:NC_024377.1	three_prime_UTR	NC_024377.1	SRSF1	ENSG00000136450
1393	7	+	1	1000	1.034	0.979696	320	1	1	GCF_001310135.2_ViralProj298087_genomic.gff:NC_027998.2	five_prime_UTR	NC_027998.2	SRSF1	ENSG00000136450
1393	7	+	1	1000	1.263	1.06816	359	1	1	GCF_001310135.2_ViralProj298087_genomic.gff:NC_027998.2	three_prime_UTR	NC_027998.2	SRSF1	ENSG00000136450
1393	7	+	1	1000	0.932	0.948829	332	0.60675	1	GCF_001712785.1_ViralProj339556_genomic.gff:NC_030791.1	five_prime_UTR	NC_030791.1	SRSF1	ENSG00000136450
1393	7	+	0	1000	0.01	0.0995485	55	1	1	GCF_001712785.1_ViralProj339556_genomic.gff:NC_030791.1	three_prime_UTR	NC_030791.1	SRSF1	ENSG00000136450
1393	7	+	0	1000	0.185	0.432391	175	1	1	GCF_002117635.1_ViralProj384965_genomic.gff:NC_034385.1	five_prime_UTR	NC_034385.1	SRSF1	ENSG00000136450
1393	7	+	0	1000	0.027	0.162164	80	1	1	GCF_002117635.1_ViralProj384965_genomic.gff:NC_034385.1	three_prime_UTR	NC_034385.1	SRSF1	ENSG00000136450
1393	7	+	1	1000	1.372	1.13442	735	1	1	GCF_002816685.1_ASM281668v1_genomic.gff:NC_038307.1	five_prime_UTR	NC_038307.1	SRSF1	ENSG00000136450
1393	7	+	0	1000	0.119	0.341988	92	1	1	GCF_002816685.1_ASM281668v1_genomic.gff:NC_038307.1	three_prime_UTR	NC_038307.1	SRSF1	ENSG00000136450
1393	7	+	0	1000	0.79	0.852424	725	1	1	GCF_002816725.1_ASM281672v1_genomic.gff:NC_038308.1	five_prime_UTR	NC_038308.1	SRSF1	ENSG00000136450
1393	7	+	0	1000	0.033	0.178726	61	1	1	GCF_002816725.1_ASM281672v1_genomic.gff:NC_038308.1	three_prime_UTR	NC_038308.1	SRSF1	ENSG00000136450
1393	7	+	0	1000	1.083	1.02037	438	0.632903	1	GCF_002820785.1_ASM282078v1_genomic.gff:NC_038426.1	five_prime_UTR	NC_038426.1	SRSF1	ENSG00000136450
1393	7	+	0	1000	0.158	0.386245	96	1	1	GCF_002820785.1_ASM282078v1_genomic.gff:NC_038426.1	three_prime_UTR	NC_038426.1	SRSF1	ENSG00000136450
1393	7	+	1	1000	1	0.970021	322	1	1	GCF_002821385.1_ASM282138v1_genomic.gff:NC_038436.1	five_prime_UTR	NC_038436.1	SRSF1	ENSG00000136450
1393	7	+	0	1000	0.025	0.156203	28	1	1	GCF_002821385.1_ASM282138v1_genomic.gff:NC_038436.1	three_prime_UTR	NC_038436.1	SRSF1	ENSG00000136450
1393	7	+	1	1000	0.278	0.510859	258	0.242817	1	GCF_009858895.2_ASM985889v3_genomic.gff:NC_045512.2	five_prime_UTR	NC_045512.2	SRSF1	ENSG00000136450
1393	7	+	0	1000	0.112	0.321807	222	1	1	GCF_009858895.2_ASM985889v3_genomic.gff:NC_045512.2	three_prime_UTR	NC_045512.2	SRSF1	ENSG00000136450
149	7	+	0	1000	0.002	0.044699	17	1	1	GCF_000850885.1_ViralProj14831_genomic.gff:NC_003908.1	five_prime_UTR	NC_003908.1	QKI	ENSG00000112531
149	7	+	0	1000	0.09	0.296628	294	1	1	GCF_000850885.1_ViralProj14831_genomic.gff:NC_003908.1	three_prime_UTR	NC_003908.1	QKI	ENSG00000112531
149	7	+	0	1000	0.018	0.133018	801	1	1	GCF_000853805.1_ViralProj14948_genomic.gff:NC_004421.1	five_prime_UTR	NC_004421.1	QKI	ENSG00000112531
149	7	+	0	1000	0.006	0.0772656	167	1	1	GCF_000853805.1_ViralProj14948_genomic.gff:NC_004421.1	three_prime_UTR	NC_004421.1	QKI	ENSG00000112531
149	7	+	0	1000	0.02	0.14007	279	1	1	GCF_000853865.1_ViralProj14960_genomic.gff:NC_005831.2	five_prime_UTR	NC_005831.2	QKI	ENSG00000112531
149	7	+	0	1000	0.009	0.0944877	280	1	1	GCF_000853865.1_ViralProj14960_genomic.gff:NC_005831.2	three_prime_UTR	NC_005831.2	QKI	ENSG00000112531
149	7	+	0	1000	0.011	0.104355	561	1	1	GCF_000860805.1_ViralProj15370_genomic.gff:NC_003690.1	three_prime_UTR	NC_003690.1	QKI	ENSG00000112531
149	7	+	0	1000	0.008	0.0891288	89	1	1	GCF_000861085.1_ViralProj15431_genomic.gff:NC_001563.2	five_prime_UTR	NC_001563.2	QKI	ENSG00000112531
149	7	+	0	1000	0.032	0.176088	566	1	1	GCF_000861085.1_ViralProj15431_genomic.gff:NC_001563.2	three_prime_UTR	NC_001563.2	QKI	ENSG00000112531
149	7	+	0	1000	0.061	0.24767	735	1	1	GCF_000861165.1_ViralProj15288_genomic.gff:NC_002058.3	five_prime_UTR	NC_002058.3	QKI	ENSG00000112531
149	7	+	0	1000	0.03	0.17644	1060	1	1	GCF_000861185.1_ViralProj15292_genomic.gff:NC_001366.1	five_prime_UTR	NC_001366.1	QKI	ENSG00000112531
149	7	+	0	1000	0.058	0.250397	695	1	1	GCF_000861505.1_ViralProj15357_genomic.gff:NC_001897.1	five_prime_UTR	NC_001897.1	QKI	ENSG00000112531
149	7	+	0	1000	0.021	0.143456	80	1	1	GCF_000861505.1_ViralProj15357_genomic.gff:NC_001897.1	three_prime_UTR	NC_001897.1	QKI	ENSG00000112531
149	7	+	0	1000	0.005	0.070569	334	1	1	GCF_000861845.1_ViralProj15432_genomic.gff:NC_004102.1	five_prime_UTR	NC_004102.1	QKI	ENSG00000112531
149	7	+	0	1000	0.047	0.211745	743	1	1	GCF_000861905.1_ViralProj15445_genomic.gff:NC_001612.1	five_prime_UTR	NC_001612.1	QKI	ENSG00000112531
149	7	+	0	1000	0.002	0.044699	74	1	1	GCF_000861905.1_ViralProj15445_genomic.gff:NC_001612.1	three_prime_UTR	NC_001612.1	QKI	ENSG00000112531
149	7	+	0	1000	0.002	0.044699	37	1	1	GCF_000862105.1_ViralProj15302_genomic.gff:NC_001449.1	five_prime_UTR	NC_001449.1	QKI	ENSG00000112531
149	7	+	0	1000	0.009	0.0944877	87	1	1	GCF_000862125.1_ViralProj15306_genomic.gff:NC_001477.1	five_prime_UTR	NC_001477.1	QKI	ENSG00000112531
149	7	+	0	1000	0.015	0.121613	455	1	1	GCF_000862125.1_ViralProj15306_genomic.gff:NC_001477.1	three_prime_UTR	NC_001477.1	QKI	ENSG00000112531
149	7	+	0	1000	0.001	0.0316228	69	1	1	GCF_000863385.1_ViralProj15392_genomic.gff:NC_003417.1	five_prime_UTR	NC_003417.1	QKI	ENSG00000112531
149	7	+	0	1000	0.002	0.044699	94	1	1	GCF_000865065.1_ViralProj15599_genomic.gff:NC_002640.1	five_prime_UTR	NC_002640.1	QKI	ENSG00000112531
149	7	+	0	1000	0.017	0.129336	377	1	1	GCF_000865065.1_ViralProj15599_genomic.gff:NC_002640.1	three_prime_UTR	NC_002640.1	QKI	ENSG00000112531
149	7	+	0	1000	0.004	0.0631505	87	1	1	GCF_000866625.1_ViralProj15598_genomic.gff:NC_001475.2	five_prime_UTR	NC_001475.2	QKI	ENSG00000112531
149	7	+	0	1000	0.011	0.104355	433	1	1	GCF_000866625.1_ViralProj15598_genomic.gff:NC_001475.2	three_prime_UTR	NC_001475.2	QKI	ENSG00000112531
149	7	+	0	1000	0.009	0.0944877	333	1	1	GCF_000871165.1_ViralProj20937_genomic.gff:NC_009823.1	five_prime_UTR	NC_009823.1	QKI	ENSG00000112531
149	7	+	0	1000	0.002	0.044699	262	1	1	GCF_000871165.1_ViralProj20937_genomic.gff:NC_009823.1	three_prime_UTR	NC_009823.1	QKI	ENSG00000112531
149	7	+	0	1000	0.017	0.136857	1033	1	1	GCF_000871545.1_ViralProj19577_genomic.gff:NC_009448.2	five_prime_UTR	NC_009448.2	QKI	ENSG00000112531
149	7	+	0	1000	0.009	0.0944877	89	1	1	GCF_000871845.1_ViralProj20183_genomic.gff:NC_001474.2	five_prime_UTR	NC_001474.2	QKI	ENSG00000112531
149	7	+	0	1000	0.015	0.121613	444	1	1	GCF_000871845.1_ViralProj20183_genomic.gff:NC_001474.2	three_prime_UTR	NC_001474.2	QKI	ENSG00000112531
149	7	+	0	1000	0.004	0.0631505	335	1	1	GCF_000872025.1_ViralProj20939_genomic.gff:NC_009827.1	five_prime_UTR	NC_009827.1	QKI	ENSG00000112531
149	7	+	0	1000	0.005	0.070569	222	1	1	GCF_000872025.1_ViralProj20939_genomic.gff:NC_009827.1	three_prime_UTR	NC_009827.1	QKI	ENSG00000112531
149	7	+	0	1000	0.005	0.070569	272	1	1	GCF_000873605.1_ViralProj20935_genomic.gff:NC_009826.1	five_prime_UTR	NC_009826.1	QKI	ENSG00000112531
149	7	+	0	1000	0.007	0.0834144	272	1	1	GCF_000874265.1_ViralProj20933_genomic.gff:NC_009825.1	five_prime_UTR	NC_009825.1	QKI	ENSG00000112531
149	7	+	0	1000	0.005	0.070569	332	1	1	GCF_000874285.1_ViralProj20941_genomic.gff:NC_009824.1	five_prime_UTR	NC_009824.1	QKI	ENSG00000112531
149	7	+	0	998	0.00801603	0.0892174	13	1	1	GCF_000874285.1_ViralProj20941_genomic.gff:NC_009824.1	three_prime_UTR	NC_009824.1	QKI	ENSG00000112531
149	7	+	0	1000	0.001	0.0316228	99	1	1	GCF_000882815.3_ViralProj36615_genomic.gff:NC_012532.1	five_prime_UTR	NC_012532.1	QKI	ENSG00000112531
149	7	+	0	1000	0.001	0.0316228	421	1	1	GCF_000882815.3_ViralProj36615_genomic.gff:NC_012532.1	three_prime_UTR	NC_012532.1	QKI	ENSG00000112531
149	7	+	0	1000	0.031	0.179084	742	1	1	GCF_000884955.1_ViralProj38499_genomic.gff:NC_012801.1	five_prime_UTR	NC_012801.1	QKI	ENSG00000112531
149	7	+	0	1000	0.032	0.176088	1157	1	1	GCF_000885595.1_ViralProj38497_genomic.gff:NC_012800.1	five_prime_UTR	NC_012800.1	QKI	ENSG00000112531
149	7	+	0	1000	0.006	0.0772656	131	1	1	GCF_000886455.1_ViralProj38493_genomic.gff:NC_012798.1	five_prime_UTR	NC_012798.1	QKI	ENSG00000112531
149	7	+	0	1000	0.001	0.0316228	75	1	1	GCF_000886455.1_ViralProj38493_genomic.gff:NC_012798.1	three_prime_UTR	NC_012798.1	QKI	ENSG00000112531
149	7	+	0	1000	0.022	0.153426	740	1	1	GCF_000886475.1_ViralProj38501_genomic.gff:NC_012802.1	five_prime_UTR	NC_012802.1	QKI	ENSG00000112531
149	7	+	0	1000	0.001	0.0316228	80	1	1	GCF_000886475.1_ViralProj38501_genomic.gff:NC_012802.1	three_prime_UTR	NC_012802.1	QKI	ENSG00000112531
149	7	+	0	1000	0.019	0.136593	271	1	1	GCF_000901155.1_ViralProj183710_genomic.gff:NC_019843.3	five_prime_UTR	NC_019843.3	QKI	ENSG00000112531
149	7	+	0	1000	0.046	0.20959	1012	1	1	GCF_000901155.1_ViralProj183710_genomic.gff:NC_019843.3	three_prime_UTR	NC_019843.3	QKI	ENSG00000112531
149	7	+	0	1000	0.001	0.0316228	88	1	1	GCF_000901475.1_ViralProj178564_genomic.gff:NC_019026.1	three_prime_UTR	NC_019026.1	QKI	ENSG00000112531
149	7	+	0	1000	0.002	0.044699	35	1	1	GCF_000917835.1_ViralProj242273_genomic.gff:NC_023812.1	five_prime_UTR	NC_023812.1	QKI	ENSG00000112531
149	7	+	0	1000	0.117	0.339745	326	1	1	GCF_000917835.1_ViralProj242273_genomic.gff:NC_023812.1	three_prime_UTR	NC_023812.1	QKI	ENSG00000112531
149	7	+	0	1000	0.008	0.0891288	513	1	1	GCF_000921975.1_ViralProj253339_genomic.gff:NC_024377.1	five_prime_UTR	NC_024377.1	QKI	ENSG00000112531
149	7	+	0	1000	0.006	0.0772656	301	1	1	GCF_000921975.1_ViralProj253339_genomic.gff:NC_024377.1	three_prime_UTR	NC_024377.1	QKI	ENSG00000112531
149	7	+	0	1000	0.005	0.070569	320	1	1	GCF_001310135.2_ViralProj298087_genomic.gff:NC_027998.2	five_prime_UTR	NC_027998.2	QKI	ENSG00000112531
149	7	+	0	1000	0.017	0.129336	359	1	1	GCF_001310135.2_ViralProj298087_genomic.gff:NC_027998.2	three_prime_UTR	NC_027998.2	QKI	ENSG00000112531
149	7	+	0	1000	0.007	0.0834144	332	1	1	GCF_001712785.1_ViralProj339556_genomic.gff:NC_030791.1	five_prime_UTR	NC_030791.1	QKI	ENSG00000112531
149	7	+	0	1000	0.007	0.0834144	175	1	1	GCF_002117635.1_ViralProj384965_genomic.gff:NC_034385.1	five_prime_UTR	NC_034385.1	QKI	ENSG00000112531
149	7	+	0	1000	0.059	0.239951	735	1	1	GCF_002816685.1_ASM281668v1_genomic.gff:NC_038307.1	five_prime_UTR	NC_038307.1	QKI	ENSG00000112531
149	7	+	0	1000	0.016	0.125538	92	1	1	GCF_002816685.1_ASM281668v1_genomic.gff:NC_038307.1	three_prime_UTR	NC_038307.1	QKI	ENSG00000112531
149	7	+	0	1000	0.074	0.269438	725	1	1	GCF_002816725.1_ASM281672v1_genomic.gff:NC_038308.1	five_prime_UTR	NC_038308.1	QKI	ENSG00000112531
149	7	+	0	1000	0.019	0.136593	61	1	1	GCF_002816725.1_ASM281672v1_genomic.gff:NC_038308.1	three_prime_UTR	NC_038308.1	QKI	ENSG00000112531
149	7	+	0	1000	0.013	0.113331	438	1	1	GCF_002820785.1_ASM282078v1_genomic.gff:NC_038426.1	five_prime_UTR	NC_038426.1	QKI	ENSG00000112531
149	7	+	0	1000	0.001	0.0316228	96	1	1	GCF_002820785.1_ASM282078v1_genomic.gff:NC_038426.1	three_prime_UTR	NC_038426.1	QKI	ENSG00000112531
149	7	+	0	1000	0.01	0.0995485	322	1	1	GCF_002821385.1_ASM282138v1_genomic.gff:NC_038436.1	five_prime_UTR	NC_038436.1	QKI	ENSG00000112531
149	7	+	0	1000	0.015	0.121613	28	1	1	GCF_002821385.1_ASM282138v1_genomic.gff:NC_038436.1	three_prime_UTR	NC_038436.1	QKI	ENSG00000112531
149	7	+	0	1000	0.048	0.213873	258	1	1	GCF_009858895.2_ASM985889v3_genomic.gff:NC_045512.2	five_prime_UTR	NC_045512.2	QKI	ENSG00000112531
149	7	+	0	1000	0.006	0.0772656	222	1	1	GCF_009858895.2_ASM985889v3_genomic.gff:NC_045512.2	three_prime_UTR	NC_045512.2	QKI	ENSG00000112531
155	6	+	0	1000	0.142	0.352079	18	1	1	GCF_000850885.1_ViralProj14831_genomic.gff:NC_003908.1	five_prime_UTR	NC_003908.1	ZFP36	ENSG00000128016
155	6	+	4	1000	2.462	1.45143	295	0.31824	1	GCF_000850885.1_ViralProj14831_genomic.gff:NC_003908.1	three_prime_UTR	NC_003908.1	ZFP36	ENSG00000128016
155	6	+	21	1000	20.171	3.84429	802	0.821102	1	GCF_000853805.1_ViralProj14948_genomic.gff:NC_004421.1	five_prime_UTR	NC_004421.1	ZFP36	ENSG00000128016
155	6	+	5	1000	8.603	2.28355	168	0.289919	1	GCF_000853805.1_ViralProj14948_genomic.gff:NC_004421.1	three_prime_UTR	NC_004421.1	ZFP36	ENSG00000128016
155	6	+	1	1000	3.963	1.80856	280	0.198111	1	GCF_000853865.1_ViralProj14960_genomic.gff:NC_005831.2	five_prime_UTR	NC_005831.2	ZFP36	ENSG00000128016
155	6	+	2	1000	1.415	1.1533	281	0.655753	1	GCF_000853865.1_ViralProj14960_genomic.gff:NC_005831.2	three_prime_UTR	NC_005831.2	ZFP36	ENSG00000128016
155	6	+	2	1000	0.891	0.853139	124	0.22408	1	GCF_000860805.1_ViralProj15370_genomic.gff:NC_003690.1	five_prime_UTR	NC_003690.1	ZFP36	ENSG00000128016
155	6	+	6	1000	5.997	2.22979	562	1	1	GCF_000860805.1_ViralProj15370_genomic.gff:NC_003690.1	three_prime_UTR	NC_003690.1	ZFP36	ENSG00000128016
155	6	+	0	1000	0.668	0.733699	90	1	1	GCF_000861085.1_ViralProj15431_genomic.gff:NC_001563.2	five_prime_UTR	NC_001563.2	ZFP36	ENSG00000128016
155	6	+	1	1000	3.58	1.7874	567	0.27938	1	GCF_000861085.1_ViralProj15431_genomic.gff:NC_001563.2	three_prime_UTR	NC_001563.2	ZFP36	ENSG00000128016
155	6	+	7	1000	8.49	2.67751	736	0.731112	1	GCF_000861165.1_ViralProj15288_genomic.gff:NC_002058.3	five_prime_UTR	NC_002058.3	ZFP36	ENSG00000128016
155	6	+	28	1000	22.455	4.25465	1061	0.239101	1	GCF_000861185.1_ViralProj15292_genomic.gff:NC_001366.1	five_prime_UTR	NC_001366.1	ZFP36	ENSG00000128016
155	6	+	9	1000	7.951	2.62173	696	0.718582	1	GCF_000861505.1_ViralProj15357_genomic.gff:NC_001897.1	five_prime_UTR	NC_001897.1	ZFP36	ENSG00000128016
155	6	+	1	1000	0.699	0.756949	81	0.504423	1	GCF_000861505.1_ViralProj15357_genomic.gff:NC_001897.1	three_prime_UTR	NC_001897.1	ZFP36	ENSG00000128016
155	6	+	5	1000	3.955	1.79895	335	0.605351	1	GCF_000861845.1_ViralProj15432_genomic.gff:NC_004102.1	five_prime_UTR	NC_004102.1	ZFP36	ENSG00000128016
155	6	+	15	1000	14.94	2.86716	263	0.894503	1	GCF_000861845.1_ViralProj15432_genomic.gff:NC_004102.1	three_prime_UTR	NC_004102.1	ZFP36	ENSG00000128016
155	6	+	10	1000	9.429	2.72183	744	0.743742	1	GCF_000861905.1_ViralProj15445_genomic.gff:NC_001612.1	five_prime_UTR	NC_001612.1	ZFP36	ENSG00000128016
155	6	+	0	1000	0.388	0.591444	75	1	1	GCF_000861905.1_ViralProj15445_genomic.gff:NC_001612.1	three_prime_UTR	NC_001612.1	ZFP36	ENSG00000128016
155	6	+	0	1000	0.055	0.228094	38	1	1	GCF_000862105.1_ViralProj15302_genomic.gff:NC_001449.1	five_prime_UTR	NC_001449.1	ZFP36	ENSG00000128016
155	6	+	3	1000	1.043	0.964407	112	0.0875167	1	GCF_000862105.1_ViralProj15302_genomic.gff:NC_001449.1	three_prime_UTR	NC_001449.1	ZFP36	ENSG00000128016
155	6	+	0	1000	1.026	0.94245	88	0.630141	1	GCF_000862125.1_ViralProj15306_genomic.gff:NC_001477.1	five_prime_UTR	NC_001477.1	ZFP36	ENSG00000128016
155	6	+	2	1000	2.049	1.40946	456	1	1	GCF_000862125.1_ViralProj15306_genomic.gff:NC_001477.1	three_prime_UTR	NC_001477.1	ZFP36	ENSG00000128016
155	6	+	2	1000	1.102	0.954205	123	0.301869	1	GCF_000863165.1_ViralProj15343_genomic.gff:NC_001809.1	five_prime_UTR	NC_001809.1	ZFP36	ENSG00000128016
155	6	+	3	1000	4.083	1.95651	491	0.804001	1	GCF_000863165.1_ViralProj15343_genomic.gff:NC_001809.1	three_prime_UTR	NC_001809.1	ZFP36	ENSG00000128016
155	6	+	3	1000	1.451	1.06993	70	0.17752	1	GCF_000863385.1_ViralProj15392_genomic.gff:NC_003417.1	five_prime_UTR	NC_003417.1	ZFP36	ENSG00000128016
155	6	+	0	1000	1.035	0.910277	95	0.630396	1	GCF_000865065.1_ViralProj15599_genomic.gff:NC_002640.1	five_prime_UTR	NC_002640.1	ZFP36	ENSG00000128016
155	6	+	3	1000	2.22	1.46757	378	0.490718	1	GCF_000865065.1_ViralProj15599_genomic.gff:NC_002640.1	three_prime_UTR	NC_002640.1	ZFP36	ENSG00000128016
155	6	+	0	1000	1.085	0.896984	88	0.631295	1	GCF_000866625.1_ViralProj15598_genomic.gff:NC_001475.2	five_prime_UTR	NC_001475.2	ZFP36	ENSG00000128016
155	6	+	4	1000	3.041	1.58424	434	0.55405	1	GCF_000866625.1_ViralProj15598_genomic.gff:NC_001475.2	three_prime_UTR	NC_001475.2	ZFP36	ENSG00000128016
155	6	+	5	1000	3.937	1.82548	334	0.604527	1	GCF_000871165.1_ViralProj20937_genomic.gff:NC_009823.1	five_prime_UTR	NC_009823.1	ZFP36	ENSG00000128016
155	6	+	9	1000	13.077	2.62868	263	0.318714	1	GCF_000871165.1_ViralProj20937_genomic.gff:NC_009823.1	three_prime_UTR	NC_009823.1	ZFP36	ENSG00000128016
155	6	+	18	1000	20.118	3.93466	1034	0.735355	1	GCF_000871545.1_ViralProj19577_genomic.gff:NC_009448.2	five_prime_UTR	NC_009448.2	ZFP36	ENSG00000128016
155	6	+	1	1000	0.466	0.642851	40	0.374207	1	GCF_000871545.1_ViralProj19577_genomic.gff:NC_009448.2	three_prime_UTR	NC_009448.2	ZFP36	ENSG00000128016
155	6	+	0	1000	1.125	0.945658	90	0.632756	1	GCF_000871845.1_ViralProj20183_genomic.gff:NC_001474.2	five_prime_UTR	NC_001474.2	ZFP36	ENSG00000128016
155	6	+	3	1000	2.56	1.51218	445	0.746207	1	GCF_000871845.1_ViralProj20183_genomic.gff:NC_001474.2	three_prime_UTR	NC_001474.2	ZFP36	ENSG00000128016
155	6	+	5	1000	3.773	1.75401	336	0.435006	1	GCF_000872025.1_ViralProj20939_genomic.gff:NC_009827.1	five_prime_UTR	NC_009827.1	ZFP36	ENSG00000128016
155	6	+	3	1000	9.716	2.39355	223	0.0207798	0.214747	GCF_000872025.1_ViralProj20939_genomic.gff:NC_009827.1	three_prime_UTR	NC_009827.1	ZFP36	ENSG00000128016
155	6	+	4	1000	2.352	1.47046	273	0.304939	1	GCF_000873605.1_ViralProj20935_genomic.gff:NC_009826.1	five_prime_UTR	NC_009826.1	ZFP36	ENSG00000128016
155	6	+	0	989	0.0728008	0.259941	13	1	1	GCF_000873605.1_ViralProj20935_genomic.gff:NC_009826.1	three_prime_UTR	NC_009826.1	ZFP36	ENSG00000128016
155	6	+	4	1000	2.455	1.45192	273	0.31724	1	GCF_000874265.1_ViralProj20933_genomic.gff:NC_009825.1	five_prime_UTR	NC_009825.1	ZFP36	ENSG00000128016
155	6	+	2	1000	3.247	1.28672	43	0.770147	1	GCF_000874265.1_ViralProj20933_genomic.gff:NC_009825.1	three_prime_UTR	NC_009825.1	ZFP36	ENSG00000128016
155	6	+	6	1000	4.037	1.82838	333	0.307339	1	GCF_000874285.1_ViralProj20941_genomic.gff:NC_009824.1	five_prime_UTR	NC_009824.1	ZFP36	ENSG00000128016
155	6	+	0	998	0.0511022	0.220317	14	1	1	GCF_000874285.1_ViralProj20941_genomic.gff:NC_009824.1	three_prime_UTR	NC_009824.1	ZFP36	ENSG00000128016
155	6	+	1	1000	0.361	0.561243	52	0.303898	1	GCF_000880715.1_ViralProj32327_genomic.gff:NC_011400.1	three_prime_UTR	NC_011400.1	ZFP36	ENSG00000128016
155	6	+	0	1000	0.613	0.715362	100	1	1	GCF_000882815.3_ViralProj36615_genomic.gff:NC_012532.1	five_prime_UTR	NC_012532.1	ZFP36	ENSG00000128016
155	6	+	3	1000	4.096	1.83907	422	0.803926	1	GCF_000882815.3_ViralProj36615_genomic.gff:NC_012532.1	three_prime_UTR	NC_012532.1	ZFP36	ENSG00000128016
155	6	+	13	1000	12.416	3.11491	743	0.775091	1	GCF_000884955.1_ViralProj38499_genomic.gff:NC_012801.1	five_prime_UTR	NC_012801.1	ZFP36	ENSG00000128016
155	6	+	0	1000	0.335	0.512872	75	1	1	GCF_000884955.1_ViralProj38499_genomic.gff:NC_012801.1	three_prime_UTR	NC_012801.1	ZFP36	ENSG00000128016
155	6	+	15	1000	16.353	3.60574	1158	0.900478	1	GCF_000885595.1_ViralProj38497_genomic.gff:NC_012800.1	five_prime_UTR	NC_012800.1	ZFP36	ENSG00000128016
155	6	+	0	1000	0.459	0.610485	87	1	1	GCF_000885595.1_ViralProj38497_genomic.gff:NC_012800.1	three_prime_UTR	NC_012800.1	ZFP36	ENSG00000128016
155	6	+	0	1000	0.187	0.40521	32	1	1	GCF_000885815.1_ViralProj39811_genomic.gff:NC_013060.1	five_prime_UTR	NC_013060.1	ZFP36	ENSG00000128016
155	6	+	0	1000	0.206	0.45582	92	1	1	GCF_000885815.1_ViralProj39811_genomic.gff:NC_013060.1	three_prime_UTR	NC_013060.1	ZFP36	ENSG00000128016
155	6	+	1	1000	2.176	1.29719	132	0.729279	1	GCF_000886455.1_ViralProj38493_genomic.gff:NC_012798.1	five_prime_UTR	NC_012798.1	ZFP36	ENSG00000128016
155	6	+	0	1000	0.967	0.797839	76	1	1	GCF_000886455.1_ViralProj38493_genomic.gff:NC_012798.1	three_prime_UTR	NC_012798.1	ZFP36	ENSG00000128016
155	6	+	14	1000	12.477	3.14091	741	0.666431	1	GCF_000886475.1_ViralProj38501_genomic.gff:NC_012802.1	five_prime_UTR	NC_012802.1	ZFP36	ENSG00000128016
155	6	+	1	1000	1.103	0.879298	81	1	1	GCF_000886475.1_ViralProj38501_genomic.gff:NC_012802.1	three_prime_UTR	NC_012802.1	ZFP36	ENSG00000128016
155	6	+	1	1000	0.81	0.655996	33	0.559615	1	GCF_000895575.1_ViralProj76723_genomic.gff:NC_016155.1	three_prime_UTR	NC_016155.1	ZFP36	ENSG00000128016
155	6	+	1	1000	0.27	0.493298	34	0.237443	1	GCF_000897955.1_ViralProj178562_genomic.gff:NC_019027.1	five_prime_UTR	NC_019027.1	ZFP36	ENSG00000128016
155	6	+	1	1000	0.44	0.656377	109	0.356537	1	GCF_000897955.1_ViralProj178562_genomic.gff:NC_019027.1	three_prime_UTR	NC_019027.1	ZFP36	ENSG00000128016
155	6	+	1	1000	0.731	0.644247	32	0.522637	1	GCF_000899535.1_ViralProj178563_genomic.gff:NC_019028.1	three_prime_UTR	NC_019028.1	ZFP36	ENSG00000128016
155	6	+	5	1000	3.262	1.62604	272	0.267267	1	GCF_000901155.1_ViralProj183710_genomic.gff:NC_019843.3	five_prime_UTR	NC_019843.3	ZFP36	ENSG00000128016
155	6	+	13	1000	10.526	2.84736	1013	0.435043	1	GCF_000901155.1_ViralProj183710_genomic.gff:NC_019843.3	three_prime_UTR	NC_019843.3	ZFP36	ENSG00000128016
155	6	+	1	1000	0.355	0.541542	30	0.300309	1	GCF_000901475.1_ViralProj178564_genomic.gff:NC_019026.1	five_prime_UTR	NC_019026.1	ZFP36	ENSG00000128016
155	6	+	0	1000	0.257	0.466013	89	1	1	GCF_000901475.1_ViralProj178564_genomic.gff:NC_019026.1	three_prime_UTR	NC_019026.1	ZFP36	ENSG00000128016
155	6	+	0	1000	0.236	0.44102	36	1	1	GCF_000917835.1_ViralProj242273_genomic.gff:NC_023812.1	five_prime_UTR	NC_023812.1	ZFP36	ENSG00000128016
155	6	+	9	1000	3.331	1.71534	327	0.00700214	0.259363	GCF_000917835.1_ViralProj242273_genomic.gff:NC_023812.1	three_prime_UTR	NC_023812.1	ZFP36	ENSG00000128016
155	6	+	2	1000	3.433	1.76766	514	0.781663	1	GCF_000921975.1_ViralProj253339_genomic.gff:NC_024377.1	five_prime_UTR	NC_024377.1	ZFP36	ENSG00000128016
155	6	+	3	1000	2.778	1.55729	302	0.759582	1	GCF_000921975.1_ViralProj253339_genomic.gff:NC_024377.1	three_prime_UTR	NC_024377.1	ZFP36	ENSG00000128016
155	6	+	1	1000	1.641	1.21227	321	1	1	GCF_001310135.2_ViralProj298087_genomic.gff:NC_027998.2	five_prime_UTR	NC_027998.2	ZFP36	ENSG00000128016
155	6	+	3	1000	2.782	1.52276	360	0.759943	1	GCF_001310135.2_ViralProj298087_genomic.gff:NC_027998.2	three_prime_UTR	NC_027998.2	ZFP36	ENSG00000128016
155	6	+	5	1000	3.962	1.78543	333	0.605665	1	GCF_001712785.1_ViralProj339556_genomic.gff:NC_030791.1	five_prime_UTR	NC_030791.1	ZFP36	ENSG00000128016
155	6	+	0	1000	1.546	0.995427	56	0.40965	1	GCF_001712785.1_ViralProj339556_genomic.gff:NC_030791.1	three_prime_UTR	NC_030791.1	ZFP36	ENSG00000128016
155	6	+	3	1000	3.361	1.70164	176	1	1	GCF_002117635.1_ViralProj384965_genomic.gff:NC_034385.1	five_prime_UTR	NC_034385.1	ZFP36	ENSG00000128016
155	6	+	4	1000	7.545	2.62695	736	0.268064	1	GCF_002816685.1_ASM281668v1_genomic.gff:NC_038307.1	five_prime_UTR	NC_038307.1	ZFP36	ENSG00000128016
155	6	+	0	1000	0.642	0.799046	93	1	1	GCF_002816685.1_ASM281668v1_genomic.gff:NC_038307.1	three_prime_UTR	NC_038307.1	ZFP36	ENSG00000128016
155	6	+	8	1000	9.858	2.84393	726	0.746639	1	GCF_002816725.1_ASM281672v1_genomic.gff:NC_038308.1	five_prime_UTR	NC_038308.1	ZFP36	ENSG00000128016
155	6	+	1	1000	1.393	1.04577	62	1	1	GCF_002816725.1_ASM281672v1_genomic.gff:NC_038308.1	three_prime_UTR	NC_038308.1	ZFP36	ENSG00000128016
155	6	+	5	1000	4.363	1.99379	439	0.630214	1	GCF_002820785.1_ASM282078v1_genomic.gff:NC_038426.1	five_prime_UTR	NC_038426.1	ZFP36	ENSG00000128016
155	6	+	0	1000	0.733	0.80769	97	1	1	GCF_002820785.1_ASM282078v1_genomic.gff:NC_038426.1	three_prime_UTR	NC_038426.1	ZFP36	ENSG00000128016
155	6	+	1	1000	1.664	1.1681	323	1	1	GCF_002821385.1_ASM282138v1_genomic.gff:NC_038436.1	five_prime_UTR	NC_038436.1	ZFP36	ENSG00000128016
155	6	+	0	1000	0.075	0.267295	29	1	1	GCF_002821385.1_ASM282138v1_genomic.gff:NC_038436.1	three_prime_UTR	NC_038436.1	ZFP36	ENSG00000128016
155	6	+	5	1000	3.142	1.57427	259	0.250586	1	GCF_009858895.2_ASM985889v3_genomic.gff:NC_045512.2	five_prime_UTR	NC_045512.2	ZFP36	ENSG00000128016
155	6	+	0	1000	1.193	1.0133	223	0.637368	1	GCF_009858895.2_ASM985889v3_genomic.gff:NC_045512.2	three_prime_UTR	NC_045512.2	ZFP36	ENSG00000128016
167	7	+	0	1000	0.067	0.250147	17	1	1	GCF_000850885.1_ViralProj14831_genomic.gff:NC_003908.1	five_prime_UTR	NC_003908.1	SRSF1	ENSG00000136450
167	7	+	3	1000	0.364	0.58979	294	0.00608664	0.305202	GCF_000850885.1_ViralProj14831_genomic.gff:NC_003908.1	three_prime_UTR	NC_003908.1	SRSF1	ENSG00000136450
167	7	+	5	1000	5.34	2.25732	801	1	1	GCF_000853805.1_ViralProj14948_genomic.gff:NC_004421.1	five_prime_UTR	NC_004421.1	SRSF1	ENSG00000136450
167	7	+	1	1000	0.562	0.75811	167	0.430472	1	GCF_000853805.1_ViralProj14948_genomic.gff:NC_004421.1	three_prime_UTR	NC_004421.1	SRSF1	ENSG00000136450
167	7	+	0	1000	0.063	0.255139	279	1	1	GCF_000853865.1_ViralProj14960_genomic.gff:NC_005831.2	five_prime_UTR	NC_005831.2	SRSF1	ENSG00000136450
167	7	+	1	1000	0.189	0.43528	280	0.172266	1	GCF_000853865.1_ViralProj14960_genomic.gff:NC_005831.2	three_prime_UTR	NC_005831.2	SRSF1	ENSG00000136450
167	7	+	0	1000	0.285	0.519659	123	1	1	GCF_000860805.1_ViralProj15370_genomic.gff:NC_003690.1	five_prime_UTR	NC_003690.1	SRSF1	ENSG00000136450
167	7	+	6	1000	6.318	2.41427	561	1	1	GCF_000860805.1_ViralProj15370_genomic.gff:NC_003690.1	three_prime_UTR	NC_003690.1	SRSF1	ENSG00000136450
167	7	+	0	1000	0.059	0.252156	89	1	1	GCF_000861085.1_ViralProj15431_genomic.gff:NC_001563.2	five_prime_UTR	NC_001563.2	SRSF1	ENSG00000136450
167	7	+	4	1000	4.063	1.91434	566	1	1	GCF_000861085.1_ViralProj15431_genomic.gff:NC_001563.2	three_prime_UTR	NC_001563.2	SRSF1	ENSG00000136450
167	7	+	2	1000	5.279	2.21361	735	0.189287	1	GCF_000861165.1_ViralProj15288_genomic.gff:NC_002058.3	five_prime_UTR	NC_002058.3	SRSF1	ENSG00000136450
167	7	+	15	1000	9.87	2.88989	1060	0.107163	1	GCF_000861185.1_ViralProj15292_genomic.gff:NC_001366.1	five_prime_UTR	NC_001366.1	SRSF1	ENSG00000136450
167	7	+	4	1000	2.936	1.73116	695	0.546677	1	GCF_000861505.1_ViralProj15357_genomic.gff:NC_001897.1	five_prime_UTR	NC_001897.1	SRSF1	ENSG00000136450
167	7	+	5	1000	5.31	2.22145	334	1	1	GCF_000861845.1_ViralProj15432_genomic.gff:NC_004102.1	five_prime_UTR	NC_004102.1	SRSF1	ENSG00000136450
167	7	+	0	1000	0.335	0.592559	262	1	1	GCF_000861845.1_ViralProj15432_genomic.gff:NC_004102.1	three_prime_UTR	NC_004102.1	SRSF1	ENSG00000136450
167	7	+	9	1000	5.377	2.28782	743	0.123813	1	GCF_000861905.1_ViralProj15445_genomic.gff:NC_001612.1	five_prime_UTR	NC_001612.1	SRSF1	ENSG00000136450
167	7	+	1	1000	0.265	0.53391	74	0.233159	1	GCF_000861905.1_ViralProj15445_genomic.gff:NC_001612.1	three_prime_UTR	NC_001612.1	SRSF1	ENSG00000136450
167	7	+	1	1000	0.772	0.822613	37	0.541671	1	GCF_000862105.1_ViralProj15302_genomic.gff:NC_001449.1	five_prime_UTR	NC_001449.1	SRSF1	ENSG00000136450
167	7	+	0	1000	0.292	0.531995	111	1	1	GCF_000862105.1_ViralProj15302_genomic.gff:NC_001449.1	three_prime_UTR	NC_001449.1	SRSF1	ENSG00000136450
167	7	+	0	1000	0.077	0.274128	87	1	1	GCF_000862125.1_ViralProj15306_genomic.gff:NC_001477.1	five_prime_UTR	NC_001477.1	SRSF1	ENSG00000136450
167	7	+	6	1000	3.35	1.76256	455	0.157113	1	GCF_000862125.1_ViralProj15306_genomic.gff:NC_001477.1	three_prime_UTR	NC_001477.1	SRSF1	ENSG00000136450
167	7	+	0	1000	0.353	0.585435	122	1	1	GCF_000863165.1_ViralProj15343_genomic.gff:NC_001809.1	five_prime_UTR	NC_001809.1	SRSF1	ENSG00000136450
167	7	+	7	1000	7.833	2.56158	490	1	1	GCF_000863165.1_ViralProj15343_genomic.gff:NC_001809.1	three_prime_UTR	NC_001809.1	SRSF1	ENSG00000136450
167	7	+	1	1000	0.313	0.548937	69	0.269271	1	GCF_000863385.1_ViralProj15392_genomic.gff:NC_003417.1	five_prime_UTR	NC_003417.1	SRSF1	ENSG00000136450
167	7	+	0	1000	0.04	0.196057	94	1	1	GCF_000865065.1_ViralProj15599_genomic.gff:NC_002640.1	five_prime_UTR	NC_002640.1	SRSF1	ENSG00000136450
167	7	+	5	1000	3.132	1.70396	377	0.249811	1	GCF_000865065.1_ViralProj15599_genomic.gff:NC_002640.1	three_prime_UTR	NC_002640.1	SRSF1	ENSG00000136450
167	7	+	0	1000	0.076	0.276225	87	1	1	GCF_000866625.1_ViralProj15598_genomic.gff:NC_001475.2	five_prime_UTR	NC_001475.2	SRSF1	ENSG00000136450
167	7	+	7	1000	3.284	1.8118	433	0.0492397	1	GCF_000866625.1_ViralProj15598_genomic.gff:NC_001475.2	three_prime_UTR	NC_001475.2	SRSF1	ENSG00000136450
167	7	+	6	1000	5.678	2.32932	333	0.830625	1	GCF_000871165.1_ViralProj20937_genomic.gff:NC_009823.1	five_prime_UTR	NC_009823.1	SRSF1	ENSG00000136450
167	7	+	0	1000	0.267	0.529142	262	1	1	GCF_000871165.1_ViralProj20937_genomic.gff:NC_009823.1	three_prime_UTR	NC_009823.1	SRSF1	ENSG00000136450
167	7	+	13	1000	8.893	2.8806	1033	0.173566	1	GCF_000871545.1_ViralProj19577_genomic.gff:NC_009448.2	five_prime_UTR	NC_009448.2	SRSF1	ENSG00000136450
167	7	+	1	1000	0.334	0.544739	39	0.284975	1	GCF_000871545.1_ViralProj19577_genomic.gff:NC_009448.2	three_prime_UTR	NC_009448.2	SRSF1	ENSG00000136450
167	7	+	0	1000	0.052	0.222138	89	1	1	GCF_000871845.1_ViralProj20183_genomic.gff:NC_001474.2	five_prime_UTR	NC_001474.2	SRSF1	ENSG00000136450
167	7	+	6	1000	2.465	1.61039	444	0.0392693	1	GCF_000871845.1_ViralProj20183_genomic.gff:NC_001474.2	three_prime_UTR	NC_001474.2	SRSF1	ENSG00000136450
167	7	+	6	1000	5.522	2.19233	335	0.827729	1	GCF_000872025.1_ViralProj20939_genomic.gff:NC_009827.1	five_prime_UTR	NC_009827.1	SRSF1	ENSG00000136450
167	7	+	0	1000	0.343	0.58283	222	1	1	GCF_000872025.1_ViralProj20939_genomic.gff:NC_009827.1	three_prime_UTR	NC_009827.1	SRSF1	ENSG00000136450
167	7	+	6	1000	5.605	2.18535	272	0.828918	1	GCF_000873605.1_ViralProj20935_genomic.gff:NC_009826.1	five_prime_UTR	NC_009826.1	SRSF1	ENSG00000136450
167	7	+	6	1000	5.591	2.28931	272	0.828657	1	GCF_000874265.1_ViralProj20933_genomic.gff:NC_009825.1	five_prime_UTR	NC_009825.1	SRSF1	ENSG00000136450
167	7	+	0	1000	0.193	0.456025	42	1	1	GCF_000874265.1_ViralProj20933_genomic.gff:NC_009825.1	three_prime_UTR	NC_009825.1	SRSF1	ENSG00000136450
167	7	+	7	1000	5.664	2.25526	332	0.520831	1	GCF_000874285.1_ViralProj20941_genomic.gff:NC_009824.1	five_prime_UTR	NC_009824.1	SRSF1	ENSG00000136450
167	7	+	0	1000	0.051	0.220108	99	1	1	GCF_000882815.3_ViralProj36615_genomic.gff:NC_012532.1	five_prime_UTR	NC_012532.1	SRSF1	ENSG00000136450
167	7	+	7	1000	4.577	2.01597	421	0.234363	1	GCF_000882815.3_ViralProj36615_genomic.gff:NC_012532.1	three_prime_UTR	NC_012532.1	SRSF1	ENSG00000136450
167	7	+	0	1000	5.156	2.25005	742	0.0123267	0.316972	GCF_000884955.1_ViralProj38499_genomic.gff:NC_012801.1	five_prime_UTR	NC_012801.1	SRSF1	ENSG00000136450
167	7	+	5	1000	5.724	2.32233	1157	1	1	GCF_000885595.1_ViralProj38497_genomic.gff:NC_012800.1	five_prime_UTR	NC_012800.1	SRSF1	ENSG00000136450
167	7	+	0	1000	0.028	0.165055	86	1	1	GCF_000885595.1_ViralProj38497_genomic.gff:NC_012800.1	three_prime_UTR	NC_012800.1	SRSF1	ENSG00000136450
167	7	+	0	1000	0.052	0.2266	31	1	1	GCF_000885815.1_ViralProj39811_genomic.gff:NC_013060.1	five_prime_UTR	NC_013060.1	SRSF1	ENSG00000136450
167	7	+	0	1000	0.04	0.206016	91	1	1	GCF_000885815.1_ViralProj39811_genomic.gff:NC_013060.1	three_prime_UTR	NC_013060.1	SRSF1	ENSG00000136450
167	7	+	1	1000	0.301	0.546532	131	0.260178	1	GCF_000886455.1_ViralProj38493_genomic.gff:NC_012798.1	five_prime_UTR	NC_012798.1	SRSF1	ENSG00000136450
167	7	+	0	1000	0.015	0.121613	75	1	1	GCF_000886455.1_ViralProj38493_genomic.gff:NC_012798.1	three_prime_UTR	NC_012798.1	SRSF1	ENSG00000136450
167	7	+	1	1000	4.349	1.95832	740	0.142638	1	GCF_000886475.1_ViralProj38501_genomic.gff:NC_012802.1	five_prime_UTR	NC_012802.1	SRSF1	ENSG00000136450
167	7	+	0	1000	0.047	0.211745	33	1	1	GCF_000897955.1_ViralProj178562_genomic.gff:NC_019027.1	five_prime_UTR	NC_019027.1	SRSF1	ENSG00000136450
167	7	+	0	1000	0.439	0.701977	108	1	1	GCF_000897955.1_ViralProj178562_genomic.gff:NC_019027.1	three_prime_UTR	NC_019027.1	SRSF1	ENSG00000136450
167	7	+	2	1000	0.664	0.780842	271	0.143251	1	GCF_000901155.1_ViralProj183710_genomic.gff:NC_019843.3	five_prime_UTR	NC_019843.3	SRSF1	ENSG00000136450
167	7	+	10	1000	2.161	1.44401	1012	8.49897e-05	0.0305963	GCF_000901155.1_ViralProj183710_genomic.gff:NC_019843.3	three_prime_UTR	NC_019843.3	SRSF1	ENSG00000136450
167	7	+	0	1000	0.082	0.278125	29	1	1	GCF_000901475.1_ViralProj178564_genomic.gff:NC_019026.1	five_prime_UTR	NC_019026.1	SRSF1	ENSG00000136450
167	7	+	0	1000	0.033	0.178726	88	1	1	GCF_000901475.1_ViralProj178564_genomic.gff:NC_019026.1	three_prime_UTR	NC_019026.1	SRSF1	ENSG00000136450
167	7	+	0	1000	0.334	0.580328	35	1	1	GCF_000917835.1_ViralProj242273_genomic.gff:NC_023812.1	five_prime_UTR	NC_023812.1	SRSF1	ENSG00000136450
167	7	+	2	1000	0.79	0.87101	326	0.187526	1	GCF_000917835.1_ViralProj242273_genomic.gff:NC_023812.1	three_prime_UTR	NC_023812.1	SRSF1	ENSG00000136450
167	7	+	13	1000	8.863	2.86154	513	0.170823	1	GCF_000921975.1_ViralProj253339_genomic.gff:NC_024377.1	five_prime_UTR	NC_024377.1	SRSF1	ENSG00000136450
167	7	+	5	1000	9.69	2.86812	301	0.141524	1	GCF_000921975.1_ViralProj253339_genomic.gff:NC_024377.1	three_prime_UTR	NC_024377.1	SRSF1	ENSG00000136450
167	7	+	11	1000	6.495	2.31373	320	0.10631	1	GCF_001310135.2_ViralProj298087_genomic.gff:NC_027998.2	five_prime_UTR	NC_027998.2	SRSF1	ENSG00000136450
167	7	+	5	1000	7.773	2.48105	359	0.463922	1	GCF_001310135.2_ViralProj298087_genomic.gff:NC_027998.2	three_prime_UTR	NC_027998.2	SRSF1	ENSG00000136450
167	7	+	8	1000	6.161	2.39182	332	0.41233	1	GCF_001712785.1_ViralProj339556_genomic.gff:NC_030791.1	five_prime_UTR	NC_030791.1	SRSF1	ENSG00000136450
167	7	+	0	1000	0.058	0.238102	55	1	1	GCF_001712785.1_ViralProj339556_genomic.gff:NC_030791.1	three_prime_UTR	NC_030791.1	SRSF1	ENSG00000136450
167	7	+	1	1000	1.63	1.25805	175	1	1	GCF_002117635.1_ViralProj384965_genomic.gff:NC_034385.1	five_prime_UTR	NC_034385.1	SRSF1	ENSG00000136450
167	7	+	6	1000	5.125	2.22043	735	0.652962	1	GCF_002816685.1_ASM281668v1_genomic.gff:NC_038307.1	five_prime_UTR	NC_038307.1	SRSF1	ENSG00000136450
167	7	+	1	1000	0.451	0.681222	92	0.363715	1	GCF_002816685.1_ASM281668v1_genomic.gff:NC_038307.1	three_prime_UTR	NC_038307.1	SRSF1	ENSG00000136450
167	7	+	1	1000	2.892	1.70506	725	0.381833	1	GCF_002816725.1_ASM281672v1_genomic.gff:NC_038308.1	five_prime_UTR	NC_038308.1	SRSF1	ENSG00000136450
167	7	+	0	1000	0.024	0.153126	61	1	1	GCF_002816725.1_ASM281672v1_genomic.gff:NC_038308.1	three_prime_UTR	NC_038308.1	SRSF1	ENSG00000136450
167	7	+	3	1000	6.364	2.53692	438	0.229426	1	GCF_002820785.1_ASM282078v1_genomic.gff:NC_038426.1	five_prime_UTR	NC_038426.1	SRSF1	ENSG00000136450
167	7	+	3	1000	1.871	1.33647	96	0.439255	1	GCF_002820785.1_ASM282078v1_genomic.gff:NC_038426.1	three_prime_UTR	NC_038426.1	SRSF1	ENSG00000136450
167	7	+	11	1000	6.346	2.3207	322	0.0690495	1	GCF_002821385.1_ASM282138v1_genomic.gff:NC_038436.1	five_prime_UTR	NC_038436.1	SRSF1	ENSG00000136450
167	7	+	0	1000	0.014	0.117549	28	1	1	GCF_002821385.1_ASM282138v1_genomic.gff:NC_038436.1	three_prime_UTR	NC_038436.1	SRSF1	ENSG00000136450
167	7	+	0	1000	0.589	0.742044	258	1	1	GCF_009858895.2_ASM985889v3_genomic.gff:NC_045512.2	five_prime_UTR	NC_045512.2	SRSF1	ENSG00000136450
167	7	+	0	1000	0.404	0.639682	222	1	1	GCF_009858895.2_ASM985889v3_genomic.gff:NC_045512.2	three_prime_UTR	NC_045512.2	SRSF1	ENSG00000136450
175	8	+	0	1000	0.002	0.044699	16	1	1	GCF_000850885.1_ViralProj14831_genomic.gff:NC_003908.1	five_prime_UTR	NC_003908.1	KHSRP	ENSG00000088247
175	8	+	0	1000	0.007	0.0834144	293	1	1	GCF_000850885.1_ViralProj14831_genomic.gff:NC_003908.1	three_prime_UTR	NC_003908.1	KHSRP	ENSG00000088247
175	8	+	0	1000	0.654	0.805564	800	1	1	GCF_000853805.1_ViralProj14948_genomic.gff:NC_004421.1	five_prime_UTR	NC_004421.1	KHSRP	ENSG00000088247
175	8	+	0	1000	0.326	0.574503	166	1	1	GCF_000853805.1_ViralProj14948_genomic.gff:NC_004421.1	three_prime_UTR	NC_004421.1	KHSRP	ENSG00000088247
175	8	+	0	1000	0.006	0.0772656	278	1	1	GCF_000853865.1_ViralProj14960_genomic.gff:NC_005831.2	five_prime_UTR	NC_005831.2	KHSRP	ENSG00000088247
175	8	+	0	1000	0.006	0.0772656	279	1	1	GCF_000853865.1_ViralProj14960_genomic.gff:NC_005831.2	three_prime_UTR	NC_005831.2	KHSRP	ENSG00000088247
175	8	+	0	1000	0.006	0.0772656	122	1	1	GCF_000860805.1_ViralProj15370_genomic.gff:NC_003690.1	five_prime_UTR	NC_003690.1	KHSRP	ENSG00000088247
175	8	+	0	1000	0.298	0.547262	560	1	1	GCF_000860805.1_ViralProj15370_genomic.gff:NC_003690.1	three_prime_UTR	NC_003690.1	KHSRP	ENSG00000088247
175	8	+	0	1000	0.004	0.0631505	88	1	1	GCF_000861085.1_ViralProj15431_genomic.gff:NC_001563.2	five_prime_UTR	NC_001563.2	KHSRP	ENSG00000088247
175	8	+	0	1000	0.118	0.346693	565	1	1	GCF_000861085.1_ViralProj15431_genomic.gff:NC_001563.2	three_prime_UTR	NC_001563.2	KHSRP	ENSG00000088247
175	8	+	0	1000	0.228	0.469293	734	1	1	GCF_000861165.1_ViralProj15288_genomic.gff:NC_002058.3	five_prime_UTR	NC_002058.3	KHSRP	ENSG00000088247
175	8	+	4	1000	0.884	0.919451	1059	0.012641	0.80371	GCF_000861185.1_ViralProj15292_genomic.gff:NC_001366.1	five_prime_UTR	NC_001366.1	KHSRP	ENSG00000088247
175	8	+	0	1000	0.209	0.44891	694	1	1	GCF_000861505.1_ViralProj15357_genomic.gff:NC_001897.1	five_prime_UTR	NC_001897.1	KHSRP	ENSG00000088247
175	8	+	2	1000	0.219	0.461792	333	0.0207056	1	GCF_000861845.1_ViralProj15432_genomic.gff:NC_004102.1	five_prime_UTR	NC_004102.1	KHSRP	ENSG00000088247
175	8	+	0	1000	0.089	0.295239	261	1	1	GCF_000861845.1_ViralProj15432_genomic.gff:NC_004102.1	three_prime_UTR	NC_004102.1	KHSRP	ENSG00000088247
175	8	+	0	1000	0.294	0.542087	742	1	1	GCF_000861905.1_ViralProj15445_genomic.gff:NC_001612.1	five_prime_UTR	NC_001612.1	KHSRP	ENSG00000088247
175	8	+	0	1000	0.006	0.0772656	73	1	1	GCF_000861905.1_ViralProj15445_genomic.gff:NC_001612.1	three_prime_UTR	NC_001612.1	KHSRP	ENSG00000088247
175	8	+	0	1000	0.006	0.0772656	110	1	1	GCF_000862105.1_ViralProj15302_genomic.gff:NC_001449.1	three_prime_UTR	NC_001449.1	KHSRP	ENSG00000088247
175	8	+	0	1000	0.098	0.310632	454	1	1	GCF_000862125.1_ViralProj15306_genomic.gff:NC_001477.1	three_prime_UTR	NC_001477.1	KHSRP	ENSG00000088247
175	8	+	0	1000	0.245	0.489095	489	1	1	GCF_000863165.1_ViralProj15343_genomic.gff:NC_001809.1	three_prime_UTR	NC_001809.1	KHSRP	ENSG00000088247
175	8	+	0	1000	0.039	0.193692	68	1	1	GCF_000863385.1_ViralProj15392_genomic.gff:NC_003417.1	five_prime_UTR	NC_003417.1	KHSRP	ENSG00000088247
175	8	+	0	1000	0.002	0.044699	93	1	1	GCF_000865065.1_ViralProj15599_genomic.gff:NC_002640.1	five_prime_UTR	NC_002640.1	KHSRP	ENSG00000088247
175	8	+	0	1000	0.092	0.299375	376	1	1	GCF_000865065.1_ViralProj15599_genomic.gff:NC_002640.1	three_prime_UTR	NC_002640.1	KHSRP	ENSG00000088247
175	8	+	0	1000	0.002	0.044699	86	1	1	GCF_000866625.1_ViralProj15598_genomic.gff:NC_001475.2	five_prime_UTR	NC_001475.2	KHSRP	ENSG00000088247
175	8	+	0	1000	0.126	0.363671	432	1	1	GCF_000866625.1_ViralProj15598_genomic.gff:NC_001475.2	three_prime_UTR	NC_001475.2	KHSRP	ENSG00000088247
175	8	+	2	1000	0.268	0.504411	332	0.0300363	1	GCF_000871165.1_ViralProj20937_genomic.gff:NC_009823.1	five_prime_UTR	NC_009823.1	KHSRP	ENSG00000088247
175	8	+	0	1000	0.063	0.255139	261	1	1	GCF_000871165.1_ViralProj20937_genomic.gff:NC_009823.1	three_prime_UTR	NC_009823.1	KHSRP	ENSG00000088247
175	8	+	3	1000	0.639	0.768941	1032	0.0270976	1	GCF_000871545.1_ViralProj19577_genomic.gff:NC_009448.2	five_prime_UTR	NC_009448.2	KHSRP	ENSG00000088247
175	8	+	0	1000	0.014	0.117549	38	1	1	GCF_000871545.1_ViralProj19577_genomic.gff:NC_009448.2	three_prime_UTR	NC_009448.2	KHSRP	ENSG00000088247
175	8	+	0	1000	0.117	0.342678	443	1	1	GCF_000871845.1_ViralProj20183_genomic.gff:NC_001474.2	three_prime_UTR	NC_001474.2	KHSRP	ENSG00000088247
175	8	+	2	1000	0.201	0.461315	334	0.0176476	1	GCF_000872025.1_ViralProj20939_genomic.gff:NC_009827.1	five_prime_UTR	NC_009827.1	KHSRP	ENSG00000088247
175	8	+	0	1000	0.053	0.224146	221	1	1	GCF_000872025.1_ViralProj20939_genomic.gff:NC_009827.1	three_prime_UTR	NC_009827.1	KHSRP	ENSG00000088247
175	8	+	2	1000	0.126	0.346763	271	0.0072791	1	GCF_000873605.1_ViralProj20935_genomic.gff:NC_009826.1	five_prime_UTR	NC_009826.1	KHSRP	ENSG00000088247
175	8	+	2	1000	0.155	0.388749	271	0.0108084	1	GCF_000874265.1_ViralProj20933_genomic.gff:NC_009825.1	five_prime_UTR	NC_009825.1	KHSRP	ENSG00000088247
175	8	+	0	1000	0.026	0.159215	41	1	1	GCF_000874265.1_ViralProj20933_genomic.gff:NC_009825.1	three_prime_UTR	NC_009825.1	KHSRP	ENSG00000088247
175	8	+	2	1000	0.239	0.500129	331	0.0243412	1	GCF_000874285.1_ViralProj20941_genomic.gff:NC_009824.1	five_prime_UTR	NC_009824.1	KHSRP	ENSG00000088247
175	8	+	0	1000	0.001	0.0316228	50	1	1	GCF_000880715.1_ViralProj32327_genomic.gff:NC_011400.1	three_prime_UTR	NC_011400.1	KHSRP	ENSG00000088247
175	8	+	0	1000	0.219	0.46825	420	1	1	GCF_000882815.3_ViralProj36615_genomic.gff:NC_012532.1	three_prime_UTR	NC_012532.1	KHSRP	ENSG00000088247
175	8	+	1	1000	0.29	0.531208	741	0.251779	1	GCF_000884955.1_ViralProj38499_genomic.gff:NC_012801.1	five_prime_UTR	NC_012801.1	KHSRP	ENSG00000088247
175	8	+	1	1000	0.319	0.559958	1156	0.273156	1	GCF_000885595.1_ViralProj38497_genomic.gff:NC_012800.1	five_prime_UTR	NC_012800.1	KHSRP	ENSG00000088247
175	8	+	0	1000	0.001	0.0316228	30	1	1	GCF_000885815.1_ViralProj39811_genomic.gff:NC_013060.1	five_prime_UTR	NC_013060.1	KHSRP	ENSG00000088247
175	8	+	0	1000	0.011	0.104355	130	1	1	GCF_000886455.1_ViralProj38493_genomic.gff:NC_012798.1	five_prime_UTR	NC_012798.1	KHSRP	ENSG00000088247
175	8	+	2	1000	0.314	0.55291	739	0.0400645	0.96422	GCF_000886475.1_ViralProj38501_genomic.gff:NC_012802.1	five_prime_UTR	NC_012802.1	KHSRP	ENSG00000088247
175	8	+	0	1000	0.008	0.0891288	107	1	1	GCF_000897955.1_ViralProj178562_genomic.gff:NC_019027.1	three_prime_UTR	NC_019027.1	KHSRP	ENSG00000088247
175	8	+	0	1000	0.023	0.15651	270	1	1	GCF_000901155.1_ViralProj183710_genomic.gff:NC_019843.3	five_prime_UTR	NC_019843.3	KHSRP	ENSG00000088247
175	8	+	0	1000	0.221	0.4758	1011	1	1	GCF_000901155.1_ViralProj183710_genomic.gff:NC_019843.3	three_prime_UTR	NC_019843.3	KHSRP	ENSG00000088247
175	8	+	0	1000	0.001	0.0316228	28	1	1	GCF_000901475.1_ViralProj178564_genomic.gff:NC_019026.1	five_prime_UTR	NC_019026.1	KHSRP	ENSG00000088247
175	8	+	0	1000	0.009	0.0944877	34	1	1	GCF_000917835.1_ViralProj242273_genomic.gff:NC_023812.1	five_prime_UTR	NC_023812.1	KHSRP	ENSG00000088247
175	8	+	0	1000	0.025	0.156203	325	1	1	GCF_000917835.1_ViralProj242273_genomic.gff:NC_023812.1	three_prime_UTR	NC_023812.1	KHSRP	ENSG00000088247
175	8	+	0	1000	0.161	0.393998	512	1	1	GCF_000921975.1_ViralProj253339_genomic.gff:NC_024377.1	five_prime_UTR	NC_024377.1	KHSRP	ENSG00000088247
175	8	+	2	1000	0.221	0.452066	300	0.021053	1	GCF_000921975.1_ViralProj253339_genomic.gff:NC_024377.1	three_prime_UTR	NC_024377.1	KHSRP	ENSG00000088247
175	8	+	0	1000	0.068	0.271016	319	1	1	GCF_001310135.2_ViralProj298087_genomic.gff:NC_027998.2	five_prime_UTR	NC_027998.2	KHSRP	ENSG00000088247
175	8	+	0	1000	0.203	0.440437	358	1	1	GCF_001310135.2_ViralProj298087_genomic.gff:NC_027998.2	three_prime_UTR	NC_027998.2	KHSRP	ENSG00000088247
175	8	+	2	1000	0.257	0.4992	331	0.0278188	1	GCF_001712785.1_ViralProj339556_genomic.gff:NC_030791.1	five_prime_UTR	NC_030791.1	KHSRP	ENSG00000088247
175	8	+	0	1000	0.003	0.0547174	54	1	1	GCF_001712785.1_ViralProj339556_genomic.gff:NC_030791.1	three_prime_UTR	NC_030791.1	KHSRP	ENSG00000088247
175	8	+	0	1000	0.118	0.34087	174	1	1	GCF_002117635.1_ViralProj384965_genomic.gff:NC_034385.1	five_prime_UTR	NC_034385.1	KHSRP	ENSG00000088247
175	8	+	1	1000	0.195	0.43493	734	0.177187	1	GCF_002816685.1_ASM281668v1_genomic.gff:NC_038307.1	five_prime_UTR	NC_038307.1	KHSRP	ENSG00000088247
175	8	+	0	1000	0.01	0.0995485	91	1	1	GCF_002816685.1_ASM281668v1_genomic.gff:NC_038307.1	three_prime_UTR	NC_038307.1	KHSRP	ENSG00000088247
175	8	+	0	1000	0.174	0.419404	724	1	1	GCF_002816725.1_ASM281672v1_genomic.gff:NC_038308.1	five_prime_UTR	NC_038308.1	KHSRP	ENSG00000088247
175	8	+	0	1000	0.005	0.070569	60	1	1	GCF_002816725.1_ASM281672v1_genomic.gff:NC_038308.1	three_prime_UTR	NC_038308.1	KHSRP	ENSG00000088247
175	8	+	1	1000	0.194	0.452293	437	0.176378	1	GCF_002820785.1_ASM282078v1_genomic.gff:NC_038426.1	five_prime_UTR	NC_038426.1	KHSRP	ENSG00000088247
175	8	+	0	1000	0.001	0.0316228	95	1	1	GCF_002820785.1_ASM282078v1_genomic.gff:NC_038426.1	three_prime_UTR	NC_038426.1	KHSRP	ENSG00000088247
175	8	+	0	1000	0.089	0.295239	321	1	1	GCF_002821385.1_ASM282138v1_genomic.gff:NC_038436.1	five_prime_UTR	NC_038436.1	KHSRP	ENSG00000088247
175	8	+	0	1000	0.002	0.044699	27	1	1	GCF_002821385.1_ASM282138v1_genomic.gff:NC_038436.1	three_prime_UTR	NC_038436.1	KHSRP	ENSG00000088247
175	8	+	0	1000	0.041	0.198389	257	1	1	GCF_009858895.2_ASM985889v3_genomic.gff:NC_045512.2	five_prime_UTR	NC_045512.2	KHSRP	ENSG00000088247
175	8	+	0	1000	0.011	0.104355	221	1	1	GCF_009858895.2_ASM985889v3_genomic.gff:NC_045512.2	three_prime_UTR	NC_045512.2	KHSRP	ENSG00000088247
64	4	+	0	1000	0.656	0.634087	20	1	1	GCF_000850885.1_ViralProj14831_genomic.gff:NC_003908.1	five_prime_UTR	NC_003908.1	NOVA1	ENSG00000139910
64	4	+	5	1000	5.24	1.69802	297	1	1	GCF_000850885.1_ViralProj14831_genomic.gff:NC_003908.1	three_prime_UTR	NC_003908.1	NOVA1	ENSG00000139910
64	4	+	23	1000	21.88	3.1912	804	0.745257	1	GCF_000853805.1_ViralProj14948_genomic.gff:NC_004421.1	five_prime_UTR	NC_004421.1	NOVA1	ENSG00000139910
64	4	+	7	1000	5.386	1.36633	170	0.504979	1	GCF_000853805.1_ViralProj14948_genomic.gff:NC_004421.1	three_prime_UTR	NC_004421.1	NOVA1	ENSG00000139910
64	4	+	3	1000	4.186	1.5178	282	0.804069	1	GCF_000853865.1_ViralProj14960_genomic.gff:NC_005831.2	five_prime_UTR	NC_005831.2	NOVA1	ENSG00000139910
64	4	+	5	1000	5.121	1.69801	283	1	1	GCF_000853865.1_ViralProj14960_genomic.gff:NC_005831.2	three_prime_UTR	NC_005831.2	NOVA1	ENSG00000139910
64	4	+	2	1000	1.789	1.00274	126	0.700567	1	GCF_000860805.1_ViralProj15370_genomic.gff:NC_003690.1	five_prime_UTR	NC_003690.1	NOVA1	ENSG00000139910
64	4	+	14	1000	15.944	2.8613	564	0.79853	1	GCF_000860805.1_ViralProj15370_genomic.gff:NC_003690.1	three_prime_UTR	NC_003690.1	NOVA1	ENSG00000139910
64	4	+	0	1000	1.253	0.865876	92	0.640254	1	GCF_000861085.1_ViralProj15431_genomic.gff:NC_001563.2	five_prime_UTR	NC_001563.2	NOVA1	ENSG00000139910
64	4	+	17	1000	13.269	2.68996	569	0.267505	1	GCF_000861085.1_ViralProj15431_genomic.gff:NC_001563.2	three_prime_UTR	NC_001563.2	NOVA1	ENSG00000139910
64	4	+	22	1000	17.879	3.01653	738	0.335832	1	GCF_000861165.1_ViralProj15288_genomic.gff:NC_002058.3	five_prime_UTR	NC_002058.3	NOVA1	ENSG00000139910
64	4	+	27	1000	27.63	3.48242	1063	1	1	GCF_000861185.1_ViralProj15292_genomic.gff:NC_001366.1	five_prime_UTR	NC_001366.1	NOVA1	ENSG00000139910
64	4	+	16	1000	15.701	2.79238	698	0.898115	1	GCF_000861505.1_ViralProj15357_genomic.gff:NC_001897.1	five_prime_UTR	NC_001897.1	NOVA1	ENSG00000139910
64	4	+	1	1000	0.519	0.576169	83	0.405854	1	GCF_000861505.1_ViralProj15357_genomic.gff:NC_001897.1	three_prime_UTR	NC_001897.1	NOVA1	ENSG00000139910
64	4	+	9	1000	7.494	1.85402	337	0.57544	1	GCF_000861845.1_ViralProj15432_genomic.gff:NC_004102.1	five_prime_UTR	NC_004102.1	NOVA1	ENSG00000139910
64	4	+	4	1000	4.301	1.29849	265	1	1	GCF_000861845.1_ViralProj15432_genomic.gff:NC_004102.1	three_prime_UTR	NC_004102.1	NOVA1	ENSG00000139910
64	4	+	19	1000	19.179	3.09266	746	1	1	GCF_000861905.1_ViralProj15445_genomic.gff:NC_001612.1	five_prime_UTR	NC_001612.1	NOVA1	ENSG00000139910
64	4	+	4	1000	2.287	1.02844	77	0.293915	1	GCF_000861905.1_ViralProj15445_genomic.gff:NC_001612.1	three_prime_UTR	NC_001612.1	NOVA1	ENSG00000139910
64	4	+	0	1000	0.92	0.779877	40	1	1	GCF_000862105.1_ViralProj15302_genomic.gff:NC_001449.1	five_prime_UTR	NC_001449.1	NOVA1	ENSG00000139910
64	4	+	0	1000	1.248	0.859788	114	0.640245	1	GCF_000862105.1_ViralProj15302_genomic.gff:NC_001449.1	three_prime_UTR	NC_001449.1	NOVA1	ENSG00000139910
64	4	+	0	1000	1.38	0.863913	90	0.651164	1	GCF_000862125.1_ViralProj15306_genomic.gff:NC_001477.1	five_prime_UTR	NC_001477.1	NOVA1	ENSG00000139910
64	4	+	12	1000	12.393	2.51453	458	1	1	GCF_000862125.1_ViralProj15306_genomic.gff:NC_001477.1	three_prime_UTR	NC_001477.1	NOVA1	ENSG00000139910
64	4	+	2	1000	1.817	1.01811	125	0.704328	1	GCF_000863165.1_ViralProj15343_genomic.gff:NC_001809.1	five_prime_UTR	NC_001809.1	NOVA1	ENSG00000139910
64	4	+	14	1000	15.729	2.80025	493	0.797171	1	GCF_000863165.1_ViralProj15343_genomic.gff:NC_001809.1	three_prime_UTR	NC_001809.1	NOVA1	ENSG00000139910
64	4	+	2	1000	2.592	1.08014	72	1	1	GCF_000863385.1_ViralProj15392_genomic.gff:NC_003417.1	five_prime_UTR	NC_003417.1	NOVA1	ENSG00000139910
64	4	+	2	1000	1.328	0.636255	62	0.384309	1	GCF_000864005.1_ViralProj15520_genomic.gff:NC_001959.2	three_prime_UTR	NC_001959.2	NOVA1	ENSG00000139910
64	4	+	0	1000	2.114	1.04981	97	0.2801	1	GCF_000865065.1_ViralProj15599_genomic.gff:NC_002640.1	five_prime_UTR	NC_002640.1	NOVA1	ENSG00000139910
64	4	+	11	1000	10.973	2.40916	380	1	1	GCF_000865065.1_ViralProj15599_genomic.gff:NC_002640.1	three_prime_UTR	NC_002640.1	NOVA1	ENSG00000139910
64	4	+	0	1000	1.207	0.874595	90	0.637063	1	GCF_000866625.1_ViralProj15598_genomic.gff:NC_001475.2	five_prime_UTR	NC_001475.2	NOVA1	ENSG00000139910
64	4	+	11	1000	9.591	2.32101	436	0.621784	1	GCF_000866625.1_ViralProj15598_genomic.gff:NC_001475.2	three_prime_UTR	NC_001475.2	NOVA1	ENSG00000139910
64	4	+	8	1000	6.411	1.70675	336	0.544554	1	GCF_000871165.1_ViralProj20937_genomic.gff:NC_009823.1	five_prime_UTR	NC_009823.1	NOVA1	ENSG00000139910
64	4	+	4	1000	5.482	1.47576	265	0.66818	1	GCF_000871165.1_ViralProj20937_genomic.gff:NC_009823.1	three_prime_UTR	NC_009823.1	NOVA1	ENSG00000139910
64	4	+	22	1000	23.217	3.39196	1036	0.916267	1	GCF_000871545.1_ViralProj19577_genomic.gff:NC_009448.2	five_prime_UTR	NC_009448.2	NOVA1	ENSG00000139910
64	4	+	2	1000	2.141	0.876292	42	1	1	GCF_000871545.1_ViralProj19577_genomic.gff:NC_009448.2	three_prime_UTR	NC_009448.2	NOVA1	ENSG00000139910
64	4	+	0	1000	1.692	0.972668	92	0.421173	1	GCF_000871845.1_ViralProj20183_genomic.gff:NC_001474.2	five_prime_UTR	NC_001474.2	NOVA1	ENSG00000139910
64	4	+	14	1000	10.151	2.3723	447	0.203823	1	GCF_000871845.1_ViralProj20183_genomic.gff:NC_001474.2	three_prime_UTR	NC_001474.2	NOVA1	ENSG00000139910
64	4	+	10	1000	8.11	2.01394	338	0.473799	1	GCF_000872025.1_ViralProj20939_genomic.gff:NC_009827.1	five_prime_UTR	NC_009827.1	NOVA1	ENSG00000139910
64	4	+	4	1000	4.665	1.42787	225	1	1	GCF_000872025.1_ViralProj20939_genomic.gff:NC_009827.1	three_prime_UTR	NC_009827.1	NOVA1	ENSG00000139910
64	4	+	4	1000	4.293	1.41745	275	1	1	GCF_000873605.1_ViralProj20935_genomic.gff:NC_009826.1	five_prime_UTR	NC_009826.1	NOVA1	ENSG00000139910
64	4	+	0	989	0.194135	0.395734	15	1	1	GCF_000873605.1_ViralProj20935_genomic.gff:NC_009826.1	three_prime_UTR	NC_009826.1	NOVA1	ENSG00000139910
64	4	+	4	1000	4.556	1.54248	275	1	1	GCF_000874265.1_ViralProj20933_genomic.gff:NC_009825.1	five_prime_UTR	NC_009825.1	NOVA1	ENSG00000139910
64	4	+	0	1000	0.999	0.63198	45	0.627979	1	GCF_000874265.1_ViralProj20933_genomic.gff:NC_009825.1	three_prime_UTR	NC_009825.1	NOVA1	ENSG00000139910
64	4	+	9	1000	6.727	1.7826	335	0.329324	1	GCF_000874285.1_ViralProj20941_genomic.gff:NC_009824.1	five_prime_UTR	NC_009824.1	NOVA1	ENSG00000139910
64	4	+	0	998	0.529058	0.570644	16	1	1	GCF_000874285.1_ViralProj20941_genomic.gff:NC_009824.1	three_prime_UTR	NC_009824.1	NOVA1	ENSG00000139910
64	4	+	1	1000	0.971	0.759431	54	0.624627	1	GCF_000880715.1_ViralProj32327_genomic.gff:NC_011400.1	three_prime_UTR	NC_011400.1	NOVA1	ENSG00000139910
64	4	+	1	1000	1.987	1.00888	102	0.726652	1	GCF_000882815.3_ViralProj36615_genomic.gff:NC_012532.1	five_prime_UTR	NC_012532.1	NOVA1	ENSG00000139910
64	4	+	18	1000	11.962	2.4113	424	0.0783814	1	GCF_000882815.3_ViralProj36615_genomic.gff:NC_012532.1	three_prime_UTR	NC_012532.1	NOVA1	ENSG00000139910
64	4	+	15	1000	20.548	3.01111	745	0.26178	1	GCF_000884955.1_ViralProj38499_genomic.gff:NC_012801.1	five_prime_UTR	NC_012801.1	NOVA1	ENSG00000139910
64	4	+	0	1000	1.045	0.741299	77	0.630082	1	GCF_000884955.1_ViralProj38499_genomic.gff:NC_012801.1	three_prime_UTR	NC_012801.1	NOVA1	ENSG00000139910
64	4	+	30	1000	33.917	3.75316	1160	0.542458	1	GCF_000885595.1_ViralProj38497_genomic.gff:NC_012800.1	five_prime_UTR	NC_012800.1	NOVA1	ENSG00000139910
64	4	+	1	1000	0.993	0.745323	89	1	1	GCF_000885595.1_ViralProj38497_genomic.gff:NC_012800.1	three_prime_UTR	NC_012800.1	NOVA1	ENSG00000139910
64	4	+	0	1000	0.317	0.490665	34	1	1	GCF_000885815.1_ViralProj39811_genomic.gff:NC_013060.1	five_prime_UTR	NC_013060.1	NOVA1	ENSG00000139910
64	4	+	2	1000	1.803	0.98953	94	0.702308	1	GCF_000885815.1_ViralProj39811_genomic.gff:NC_013060.1	three_prime_UTR	NC_013060.1	NOVA1	ENSG00000139910
64	4	+	3	1000	3.887	1.39935	134	1	1	GCF_000886455.1_ViralProj38493_genomic.gff:NC_012798.1	five_prime_UTR	NC_012798.1	NOVA1	ENSG00000139910
64	4	+	1	1000	1.471	0.855506	78	1	1	GCF_000886455.1_ViralProj38493_genomic.gff:NC_012798.1	three_prime_UTR	NC_012798.1	NOVA1	ENSG00000139910
64	4	+	19	1000	20.153	3.04284	743	0.909999	1	GCF_000886475.1_ViralProj38501_genomic.gff:NC_012802.1	five_prime_UTR	NC_012802.1	NOVA1	ENSG00000139910
64	4	+	1	1000	1.357	0.810066	83	1	1	GCF_000886475.1_ViralProj38501_genomic.gff:NC_012802.1	three_prime_UTR	NC_012802.1	NOVA1	ENSG00000139910
64	4	+	1	1000	0.862	0.345073	35	0.582217	1	GCF_000895575.1_ViralProj76723_genomic.gff:NC_016155.1	three_prime_UTR	NC_016155.1	NOVA1	ENSG00000139910
64	4	+	0	1000	0.328	0.46972	36	1	1	GCF_000897955.1_ViralProj178562_genomic.gff:NC_019027.1	five_prime_UTR	NC_019027.1	NOVA1	ENSG00000139910
64	4	+	3	1000	3.516	1.05871	111	1	1	GCF_000897955.1_ViralProj178562_genomic.gff:NC_019027.1	three_prime_UTR	NC_019027.1	NOVA1	ENSG00000139910
64	4	+	1	1000	1.517	0.562163	34	1	1	GCF_000899535.1_ViralProj178563_genomic.gff:NC_019028.1	three_prime_UTR	NC_019028.1	NOVA1	ENSG00000139910
64	4	+	4	1000	5.959	1.72461	274	0.536476	1	GCF_000901155.1_ViralProj183710_genomic.gff:NC_019843.3	five_prime_UTR	NC_019843.3	NOVA1	ENSG00000139910
64	4	+	27	1000	25.676	3.81544	1015	0.763825	1	GCF_000901155.1_ViralProj183710_genomic.gff:NC_019843.3	three_prime_UTR	NC_019843.3	NOVA1	ENSG00000139910
64	4	+	0	1000	0.617	0.575014	32	1	1	GCF_000901475.1_ViralProj178564_genomic.gff:NC_019026.1	five_prime_UTR	NC_019026.1	NOVA1	ENSG00000139910
64	4	+	1	1000	1.757	0.996466	91	1	1	GCF_000901475.1_ViralProj178564_genomic.gff:NC_019026.1	three_prime_UTR	NC_019026.1	NOVA1	ENSG00000139910
64	4	+	1	1000	1.382	0.807916	38	1	1	GCF_000917835.1_ViralProj242273_genomic.gff:NC_023812.1	five_prime_UTR	NC_023812.1	NOVA1	ENSG00000139910
64	4	+	6	1000	3.934	1.54273	329	0.298834	1	GCF_000917835.1_ViralProj242273_genomic.gff:NC_023812.1	three_prime_UTR	NC_023812.1	NOVA1	ENSG00000139910
64	4	+	12	1000	9.93	2.24992	516	0.518084	1	GCF_000921975.1_ViralProj253339_genomic.gff:NC_024377.1	five_prime_UTR	NC_024377.1	NOVA1	ENSG00000139910
64	4	+	7	1000	4.683	1.60907	304	0.243039	1	GCF_000921975.1_ViralProj253339_genomic.gff:NC_024377.1	three_prime_UTR	NC_024377.1	NOVA1	ENSG00000139910
64	4	+	9	1000	8.154	2.06071	323	0.720901	1	GCF_001310135.2_ViralProj298087_genomic.gff:NC_027998.2	five_prime_UTR	NC_027998.2	NOVA1	ENSG00000139910
64	4	+	9	1000	8.886	2.06525	362	0.865303	1	GCF_001310135.2_ViralProj298087_genomic.gff:NC_027998.2	three_prime_UTR	NC_027998.2	NOVA1	ENSG00000139910
64	4	+	9	1000	7.303	1.80512	335	0.454338	1	GCF_001712785.1_ViralProj339556_genomic.gff:NC_030791.1	five_prime_UTR	NC_030791.1	NOVA1	ENSG00000139910
64	4	+	2	1000	0.774	0.677778	58	0.181343	1	GCF_001712785.1_ViralProj339556_genomic.gff:NC_030791.1	three_prime_UTR	NC_030791.1	NOVA1	ENSG00000139910
64	4	+	5	1000	5.22	1.52116	178	1	1	GCF_002117635.1_ViralProj384965_genomic.gff:NC_034385.1	five_prime_UTR	NC_034385.1	NOVA1	ENSG00000139910
64	4	+	1	1000	2.695	0.866444	83	0.52816	1	GCF_002117635.1_ViralProj384965_genomic.gff:NC_034385.1	three_prime_UTR	NC_034385.1	NOVA1	ENSG00000139910
64	4	+	21	1000	19.94	3.2241	738	0.734012	1	GCF_002816685.1_ASM281668v1_genomic.gff:NC_038307.1	five_prime_UTR	NC_038307.1	NOVA1	ENSG00000139910
64	4	+	1	1000	1.147	0.868415	95	1	1	GCF_002816685.1_ASM281668v1_genomic.gff:NC_038307.1	three_prime_UTR	NC_038307.1	NOVA1	ENSG00000139910
64	4	+	18	1000	13.787	2.75885	728	0.273421	1	GCF_002816725.1_ASM281672v1_genomic.gff:NC_038308.1	five_prime_UTR	NC_038308.1	NOVA1	ENSG00000139910
64	4	+	2	1000	1.248	0.870203	64	0.355517	1	GCF_002816725.1_ASM281672v1_genomic.gff:NC_038308.1	three_prime_UTR	NC_038308.1	NOVA1	ENSG00000139910
64	4	+	14	1000	12.818	2.32083	441	0.670566	1	GCF_002820785.1_ASM282078v1_genomic.gff:NC_038426.1	five_prime_UTR	NC_038426.1	NOVA1	ENSG00000139910
64	4	+	0	1000	1.818	0.995926	99	0.269455	1	GCF_002820785.1_ASM282078v1_genomic.gff:NC_038426.1	three_prime_UTR	NC_038426.1	NOVA1	ENSG00000139910
64	4	+	9	1000	7.877	1.92707	325	0.589458	1	GCF_002821385.1_ASM282138v1_genomic.gff:NC_038436.1	five_prime_UTR	NC_038436.1	NOVA1	ENSG00000139910
64	4	+	1	1000	1.276	0.802788	31	1	1	GCF_002821385.1_ASM282138v1_genomic.gff:NC_038436.1	three_prime_UTR	NC_038436.1	NOVA1	ENSG00000139910
64	4	+	5	1000	5.878	1.74991	261	1	1	GCF_009858895.2_ASM985889v3_genomic.gff:NC_045512.2	five_prime_UTR	NC_045512.2	NOVA1	ENSG00000139910
64	4	+	6	1000	2.437	1.3022	225	0.0370726	0.472676	GCF_009858895.2_ASM985889v3_genomic.gff:NC_045512.2	three_prime_UTR	NC_045512.2	NOVA1	ENSG00000139910
75	6	+	0	1000	0.94	1.12857	18	1	1	GCF_000850885.1_ViralProj14831_genomic.gff:NC_003908.1	five_prime_UTR	NC_003908.1	PPIE	ENSG00000084072
75	6	+	36	1000	20.231	5.3271	295	0.000765411	0.13433	GCF_000850885.1_ViralProj14831_genomic.gff:NC_003908.1	three_prime_UTR	NC_003908.1	PPIE	ENSG00000084072
75	6	+	6	1000	5.419	3.15712	802	0.667479	1	GCF_000853805.1_ViralProj14948_genomic.gff:NC_004421.1	five_prime_UTR	NC_004421.1	PPIE	ENSG00000084072
75	6	+	1	1000	0.665	1.11086	168	0.486405	1	GCF_000853805.1_ViralProj14948_genomic.gff:NC_004421.1	three_prime_UTR	NC_004421.1	PPIE	ENSG00000084072
75	6	+	13	1000	13.067	4.44345	280	1	1	GCF_000853865.1_ViralProj14960_genomic.gff:NC_005831.2	five_prime_UTR	NC_005831.2	PPIE	ENSG00000084072
75	6	+	13	1000	19.587	5.57777	281	0.157858	1	GCF_000853865.1_ViralProj14960_genomic.gff:NC_005831.2	three_prime_UTR	NC_005831.2	PPIE	ENSG00000084072
75	6	+	0	1000	0.832	1.24713	124	1	1	GCF_000860805.1_ViralProj15370_genomic.gff:NC_003690.1	five_prime_UTR	NC_003690.1	PPIE	ENSG00000084072
75	6	+	3	1000	2.087	1.96858	562	0.470479	1	GCF_000860805.1_ViralProj15370_genomic.gff:NC_003690.1	three_prime_UTR	NC_003690.1	PPIE	ENSG00000084072
75	6	+	1	1000	0.752	1.19076	90	0.530064	1	GCF_000861085.1_ViralProj15431_genomic.gff:NC_001563.2	five_prime_UTR	NC_001563.2	PPIE	ENSG00000084072
75	6	+	9	1000	3.697	2.60345	567	0.0133379	0.659136	GCF_000861085.1_ViralProj15431_genomic.gff:NC_001563.2	three_prime_UTR	NC_001563.2	PPIE	ENSG00000084072
75	6	+	10	1000	10.258	4.33292	736	1	1	GCF_000861165.1_ViralProj15288_genomic.gff:NC_002058.3	five_prime_UTR	NC_002058.3	PPIE	ENSG00000084072
75	6	+	24	1000	11.181	4.48892	1061	0.000698317	0.252092	GCF_000861185.1_ViralProj15292_genomic.gff:NC_001366.1	five_prime_UTR	NC_001366.1	PPIE	ENSG00000084072
75	6	+	17	1000	13.239	5.01608	696	0.267376	1	GCF_000861505.1_ViralProj15357_genomic.gff:NC_001897.1	five_prime_UTR	NC_001897.1	PPIE	ENSG00000084072
75	6	+	4	1000	12.645	3.72624	81	0.00529205	1	GCF_000861505.1_ViralProj15357_genomic.gff:NC_001897.1	three_prime_UTR	NC_001897.1	PPIE	ENSG00000084072
75	6	+	0	1000	0.506	0.990427	335	1	1	GCF_000861845.1_ViralProj15432_genomic.gff:NC_004102.1	five_prime_UTR	NC_004102.1	PPIE	ENSG00000084072
75	6	+	75	1000	36.513	6.14602	263	5.92526e-10	1.2443e-08	GCF_000861845.1_ViralProj15432_genomic.gff:NC_004102.1	three_prime_UTR	NC_004102.1	PPIE	ENSG00000084072
75	6	+	9	1000	8.963	3.92671	744	0.867078	1	GCF_000861905.1_ViralProj15445_genomic.gff:NC_001612.1	five_prime_UTR	NC_001612.1	PPIE	ENSG00000084072
75	6	+	3	1000	1.966	1.79054	75	0.450374	1	GCF_000861905.1_ViralProj15445_genomic.gff:NC_001612.1	three_prime_UTR	NC_001612.1	PPIE	ENSG00000084072
75	6	+	0	1000	0.534	0.891986	38	1	1	GCF_000862105.1_ViralProj15302_genomic.gff:NC_001449.1	five_prime_UTR	NC_001449.1	PPIE	ENSG00000084072
75	6	+	25	1000	21.907	4.26433	112	0.474439	1	GCF_000862105.1_ViralProj15302_genomic.gff:NC_001449.1	three_prime_UTR	NC_001449.1	PPIE	ENSG00000084072
75	6	+	5	1000	1.779	1.70384	88	0.0333158	1	GCF_000862125.1_ViralProj15306_genomic.gff:NC_001477.1	five_prime_UTR	NC_001477.1	PPIE	ENSG00000084072
75	6	+	14	1000	4.623	2.82469	456	0.000299435	0.105701	GCF_000862125.1_ViralProj15306_genomic.gff:NC_001477.1	three_prime_UTR	NC_001477.1	PPIE	ENSG00000084072
75	6	+	5	1000	3.713	2.29388	123	0.425706	1	GCF_000863165.1_ViralProj15343_genomic.gff:NC_001809.1	five_prime_UTR	NC_001809.1	PPIE	ENSG00000084072
75	6	+	2	1000	1.449	1.57094	491	0.659491	1	GCF_000863165.1_ViralProj15343_genomic.gff:NC_001809.1	three_prime_UTR	NC_001809.1	PPIE	ENSG00000084072
75	6	+	0	1000	0.095	0.376984	70	1	1	GCF_000863385.1_ViralProj15392_genomic.gff:NC_003417.1	five_prime_UTR	NC_003417.1	PPIE	ENSG00000084072
75	6	+	11	1000	12.784	3.39866	60	0.639593	1	GCF_000864005.1_ViralProj15520_genomic.gff:NC_001959.2	three_prime_UTR	NC_001959.2	PPIE	ENSG00000084072
75	6	+	0	1000	1.023	1.34174	95	0.63027	1	GCF_000865065.1_ViralProj15599_genomic.gff:NC_002640.1	five_prime_UTR	NC_002640.1	PPIE	ENSG00000084072
75	6	+	4	1000	2.741	2.15559	378	0.358621	1	GCF_000865065.1_ViralProj15599_genomic.gff:NC_002640.1	three_prime_UTR	NC_002640.1	PPIE	ENSG00000084072
75	6	+	5	1000	0.875	1.13696	88	0.00192222	0.6228	GCF_000866625.1_ViralProj15598_genomic.gff:NC_001475.2	five_prime_UTR	NC_001475.2	PPIE	ENSG00000084072
75	6	+	5	1000	1.839	1.8062	434	0.0389464	1	GCF_000866625.1_ViralProj15598_genomic.gff:NC_001475.2	three_prime_UTR	NC_001475.2	PPIE	ENSG00000084072
75	6	+	0	1000	0.979	1.30394	334	1	1	GCF_000871165.1_ViralProj20937_genomic.gff:NC_009823.1	five_prime_UTR	NC_009823.1	PPIE	ENSG00000084072
75	6	+	84	1000	37.683	6.05171	263	3.91088e-13	8.26174e-12	GCF_000871165.1_ViralProj20937_genomic.gff:NC_009823.1	three_prime_UTR	NC_009823.1	PPIE	ENSG00000084072
75	6	+	20	1000	17.075	5.46967	1034	0.46227	1	GCF_000871545.1_ViralProj19577_genomic.gff:NC_009448.2	five_prime_UTR	NC_009448.2	PPIE	ENSG00000084072
75	6	+	0	1000	0.084	0.339204	40	1	1	GCF_000871545.1_ViralProj19577_genomic.gff:NC_009448.2	three_prime_UTR	NC_009448.2	PPIE	ENSG00000084072
75	6	+	6	1000	1.55	1.61186	90	0.00474088	1	GCF_000871845.1_ViralProj20183_genomic.gff:NC_001474.2	five_prime_UTR	NC_001474.2	PPIE	ENSG00000084072
75	6	+	7	1000	6.575	3.44997	445	0.842479	1	GCF_000871845.1_ViralProj20183_genomic.gff:NC_001474.2	three_prime_UTR	NC_001474.2	PPIE	ENSG00000084072
75	6	+	0	1000	0.711	1.068	336	1	1	GCF_000872025.1_ViralProj20939_genomic.gff:NC_009827.1	five_prime_UTR	NC_009827.1	PPIE	ENSG00000084072
75	6	+	59	1000	20.248	5.00115	223	4.19599e-14	6.81349e-13	GCF_000872025.1_ViralProj20939_genomic.gff:NC_009827.1	three_prime_UTR	NC_009827.1	PPIE	ENSG00000084072
75	6	+	0	1000	0.634	1.06451	273	1	1	GCF_000873605.1_ViralProj20935_genomic.gff:NC_009826.1	five_prime_UTR	NC_009826.1	PPIE	ENSG00000084072
75	6	+	1	1000	0.95	1.31728	273	0.613899	1	GCF_000874265.1_ViralProj20933_genomic.gff:NC_009825.1	five_prime_UTR	NC_009825.1	PPIE	ENSG00000084072
75	6	+	12	1000	6.933	2.19347	43	0.0577907	0.523895	GCF_000874265.1_ViralProj20933_genomic.gff:NC_009825.1	three_prime_UTR	NC_009825.1	PPIE	ENSG00000084072
75	6	+	1	1000	0.543	0.994555	333	0.419255	1	GCF_000874285.1_ViralProj20941_genomic.gff:NC_009824.1	five_prime_UTR	NC_009824.1	PPIE	ENSG00000084072
75	6	+	0	998	0.0260521	0.15937	14	1	1	GCF_000874285.1_ViralProj20941_genomic.gff:NC_009824.1	three_prime_UTR	NC_009824.1	PPIE	ENSG00000084072
75	6	+	15	1000	16.053	3.17305	52	0.880855	1	GCF_000880715.1_ViralProj32327_genomic.gff:NC_011400.1	three_prime_UTR	NC_011400.1	PPIE	ENSG00000084072
75	6	+	3	1000	0.684	1.02918	100	0.0316903	1	GCF_000882815.3_ViralProj36615_genomic.gff:NC_012532.1	five_prime_UTR	NC_012532.1	PPIE	ENSG00000084072
75	6	+	3	1000	1.403	1.58275	422	0.166987	1	GCF_000882815.3_ViralProj36615_genomic.gff:NC_012532.1	three_prime_UTR	NC_012532.1	PPIE	ENSG00000084072
75	6	+	23	1000	8.858	3.92393	743	4.63982e-05	0.00677149	GCF_000884955.1_ViralProj38499_genomic.gff:NC_012801.1	five_prime_UTR	NC_012801.1	PPIE	ENSG00000084072
75	6	+	16	1000	17.704	4.0053	75	0.785571	1	GCF_000884955.1_ViralProj38499_genomic.gff:NC_012801.1	three_prime_UTR	NC_012801.1	PPIE	ENSG00000084072
75	6	+	25	1000	14.035	5.07558	1158	0.00659025	0.306231	GCF_000885595.1_ViralProj38497_genomic.gff:NC_012800.1	five_prime_UTR	NC_012800.1	PPIE	ENSG00000084072
75	6	+	16	1000	22.248	3.73101	87	0.14049	1	GCF_000885595.1_ViralProj38497_genomic.gff:NC_012800.1	three_prime_UTR	NC_012800.1	PPIE	ENSG00000084072
75	6	+	1	1000	0.069	0.283407	32	0.0667428	1	GCF_000885815.1_ViralProj39811_genomic.gff:NC_013060.1	five_prime_UTR	NC_013060.1	PPIE	ENSG00000084072
75	6	+	4	1000	7.85	3.24562	92	0.190043	1	GCF_000885815.1_ViralProj39811_genomic.gff:NC_013060.1	three_prime_UTR	NC_013060.1	PPIE	ENSG00000084072
75	6	+	14	1000	4.043	2.61151	132	5.89067e-05	0.0204406	GCF_000886455.1_ViralProj38493_genomic.gff:NC_012798.1	five_prime_UTR	NC_012798.1	PPIE	ENSG00000084072
75	6	+	7	1000	11.138	3.65326	76	0.253684	1	GCF_000886455.1_ViralProj38493_genomic.gff:NC_012798.1	three_prime_UTR	NC_012798.1	PPIE	ENSG00000084072
75	6	+	14	1000	6.875	3.46892	741	0.0117716	0.52425	GCF_000886475.1_ViralProj38501_genomic.gff:NC_012802.1	five_prime_UTR	NC_012802.1	PPIE	ENSG00000084072
75	6	+	9	1000	8.476	3.23943	81	0.855195	1	GCF_000886475.1_ViralProj38501_genomic.gff:NC_012802.1	three_prime_UTR	NC_012802.1	PPIE	ENSG00000084072
75	6	+	6	1000	7.118	2.6159	33	0.832457	1	GCF_000895575.1_ViralProj76723_genomic.gff:NC_016155.1	three_prime_UTR	NC_016155.1	PPIE	ENSG00000084072
75	6	+	0	1000	0.297	0.67768	34	1	1	GCF_000897955.1_ViralProj178562_genomic.gff:NC_019027.1	five_prime_UTR	NC_019027.1	PPIE	ENSG00000084072
75	6	+	3	1000	4.285	2.69426	109	0.802949	1	GCF_000897955.1_ViralProj178562_genomic.gff:NC_019027.1	three_prime_UTR	NC_019027.1	PPIE	ENSG00000084072
75	6	+	4	1000	4.403	2.33924	32	1	1	GCF_000899535.1_ViralProj178563_genomic.gff:NC_019028.1	three_prime_UTR	NC_019028.1	PPIE	ENSG00000084072
75	6	+	15	1000	8.34	3.90841	272	0.0316576	1	GCF_000901155.1_ViralProj183710_genomic.gff:NC_019843.3	five_prime_UTR	NC_019843.3	PPIE	ENSG00000084072
75	6	+	43	1000	26.808	6.83329	1013	0.00310851	0.279766	GCF_000901155.1_ViralProj183710_genomic.gff:NC_019843.3	three_prime_UTR	NC_019843.3	PPIE	ENSG00000084072
75	6	+	0	1000	0.029	0.184914	30	1	1	GCF_000901475.1_ViralProj178564_genomic.gff:NC_019026.1	five_prime_UTR	NC_019026.1	PPIE	ENSG00000084072
75	6	+	10	1000	7.982	3.17108	89	0.455084	1	GCF_000901475.1_ViralProj178564_genomic.gff:NC_019026.1	three_prime_UTR	NC_019026.1	PPIE	ENSG00000084072
75	6	+	0	1000	0.351	0.774854	36	1	1	GCF_000917835.1_ViralProj242273_genomic.gff:NC_023812.1	five_prime_UTR	NC_023812.1	PPIE	ENSG00000084072
75	6	+	49	1000	32.739	6.25124	327	0.00418353	0.212137	GCF_000917835.1_ViralProj242273_genomic.gff:NC_023812.1	three_prime_UTR	NC_023812.1	PPIE	ENSG00000084072
75	6	+	4	1000	3.659	2.64305	514	0.789167	1	GCF_000921975.1_ViralProj253339_genomic.gff:NC_024377.1	five_prime_UTR	NC_024377.1	PPIE	ENSG00000084072
75	6	+	1	1000	1.656	1.69604	302	1	1	GCF_000921975.1_ViralProj253339_genomic.gff:NC_024377.1	three_prime_UTR	NC_024377.1	PPIE	ENSG00000084072
75	6	+	0	1000	0.464	0.895268	321	1	1	GCF_001310135.2_ViralProj298087_genomic.gff:NC_027998.2	five_prime_UTR	NC_027998.2	PPIE	ENSG00000084072
75	6	+	0	1000	1.104	1.35684	360	0.633474	1	GCF_001310135.2_ViralProj298087_genomic.gff:NC_027998.2	three_prime_UTR	NC_027998.2	PPIE	ENSG00000084072
75	6	+	0	1000	0.445	0.842428	333	1	1	GCF_001712785.1_ViralProj339556_genomic.gff:NC_030791.1	five_prime_UTR	NC_030791.1	PPIE	ENSG00000084072
75	6	+	23	1000	17.303	3.04737	56	0.11147	0.727491	GCF_001712785.1_ViralProj339556_genomic.gff:NC_030791.1	three_prime_UTR	NC_030791.1	PPIE	ENSG00000084072
75	6	+	14	1000	4.414	2.72287	176	0.000161116	0.0573572	GCF_002117635.1_ViralProj384965_genomic.gff:NC_034385.1	five_prime_UTR	NC_034385.1	PPIE	ENSG00000084072
75	6	+	3	1000	9.315	3.37389	81	0.022708	1	GCF_002117635.1_ViralProj384965_genomic.gff:NC_034385.1	three_prime_UTR	NC_034385.1	PPIE	ENSG00000084072
75	6	+	12	1000	10.645	4.42816	736	0.641284	1	GCF_002816685.1_ASM281668v1_genomic.gff:NC_038307.1	five_prime_UTR	NC_038307.1	PPIE	ENSG00000084072
75	6	+	6	1000	4.907	2.8405	93	0.638041	1	GCF_002816685.1_ASM281668v1_genomic.gff:NC_038307.1	three_prime_UTR	NC_038307.1	PPIE	ENSG00000084072
75	6	+	23	1000	14.535	5.1863	726	0.0327393	1	GCF_002816725.1_ASM281672v1_genomic.gff:NC_038308.1	five_prime_UTR	NC_038308.1	PPIE	ENSG00000084072
75	6	+	3	1000	2.229	1.88842	62	0.489462	1	GCF_002816725.1_ASM281672v1_genomic.gff:NC_038308.1	three_prime_UTR	NC_038308.1	PPIE	ENSG00000084072
75	6	+	0	1000	1.444	1.67561	439	0.412428	1	GCF_002820785.1_ASM282078v1_genomic.gff:NC_038426.1	five_prime_UTR	NC_038426.1	PPIE	ENSG00000084072
75	6	+	30	1000	22.234	3.41715	97	0.0694037	0.665459	GCF_002820785.1_ASM282078v1_genomic.gff:NC_038426.1	three_prime_UTR	NC_038426.1	PPIE	ENSG00000084072
75	6	+	0	1000	0.434	0.854619	323	1	1	GCF_002821385.1_ASM282138v1_genomic.gff:NC_038436.1	five_prime_UTR	NC_038436.1	PPIE	ENSG00000084072
75	6	+	0	1000	0.346	0.768684	29	1	1	GCF_002821385.1_ASM282138v1_genomic.gff:NC_038436.1	three_prime_UTR	NC_038436.1	PPIE	ENSG00000084072
75	6	+	12	1000	4.57	2.88919	259	0.0024573	0.434942	GCF_009858895.2_ASM985889v3_genomic.gff:NC_045512.2	five_prime_UTR	NC_045512.2	PPIE	ENSG00000084072
75	6	+	42	1000	17.182	4.86421	223	8.25842e-08	3.80459e-06	GCF_009858895.2_ASM985889v3_genomic.gff:NC_045512.2	three_prime_UTR	NC_045512.2	PPIE	ENSG00000084072
922	4	+	0	1000	0.558	0.607458	20	1	1	GCF_000850885.1_ViralProj14831_genomic.gff:NC_003908.1	five_prime_UTR	NC_003908.1	RBMX	ENSG00000147274
922	4	+	1	1000	1.213	0.860448	297	1	1	GCF_000850885.1_ViralProj14831_genomic.gff:NC_003908.1	three_prime_UTR	NC_003908.1	RBMX	ENSG00000147274
922	4	+	15	1000	14.289	2.91307	804	0.789118	1	GCF_000853805.1_ViralProj14948_genomic.gff:NC_004421.1	five_prime_UTR	NC_004421.1	RBMX	ENSG00000147274
922	4	+	3	1000	3.099	1.30649	170	1	1	GCF_000853805.1_ViralProj14948_genomic.gff:NC_004421.1	three_prime_UTR	NC_004421.1	RBMX	ENSG00000147274
922	4	+	0	1000	0.761	0.749961	282	1	1	GCF_000853865.1_ViralProj14960_genomic.gff:NC_005831.2	five_prime_UTR	NC_005831.2	RBMX	ENSG00000147274
922	4	+	3	1000	2.438	1.13818	283	0.527096	1	GCF_000853865.1_ViralProj14960_genomic.gff:NC_005831.2	three_prime_UTR	NC_005831.2	RBMX	ENSG00000147274
922	4	+	1	1000	0.583	0.627299	126	0.442534	1	GCF_000860805.1_ViralProj15370_genomic.gff:NC_003690.1	five_prime_UTR	NC_003690.1	RBMX	ENSG00000147274
922	4	+	13	1000	12.812	2.70481	564	0.887463	1	GCF_000860805.1_ViralProj15370_genomic.gff:NC_003690.1	three_prime_UTR	NC_003690.1	RBMX	ENSG00000147274
922	4	+	0	1000	0.238	0.426072	92	1	1	GCF_000861085.1_ViralProj15431_genomic.gff:NC_001563.2	five_prime_UTR	NC_001563.2	RBMX	ENSG00000147274
922	4	+	16	1000	12.117	2.48707	569	0.244101	1	GCF_000861085.1_ViralProj15431_genomic.gff:NC_001563.2	three_prime_UTR	NC_001563.2	RBMX	ENSG00000147274
922	4	+	16	1000	13.958	2.78819	738	0.586697	1	GCF_000861165.1_ViralProj15288_genomic.gff:NC_002058.3	five_prime_UTR	NC_002058.3	RBMX	ENSG00000147274
922	4	+	21	1000	23.083	3.48314	1063	0.752234	1	GCF_000861185.1_ViralProj15292_genomic.gff:NC_001366.1	five_prime_UTR	NC_001366.1	RBMX	ENSG00000147274
922	4	+	16	1000	11.251	2.5192	698	0.172153	1	GCF_000861505.1_ViralProj15357_genomic.gff:NC_001897.1	five_prime_UTR	NC_001897.1	RBMX	ENSG00000147274
922	4	+	11	1000	8.924	2.19112	337	0.493455	1	GCF_000861845.1_ViralProj15432_genomic.gff:NC_004102.1	five_prime_UTR	NC_004102.1	RBMX	ENSG00000147274
922	4	+	2	1000	2.158	1.19602	265	1	1	GCF_000861845.1_ViralProj15432_genomic.gff:NC_004102.1	three_prime_UTR	NC_004102.1	RBMX	ENSG00000147274
922	4	+	16	1000	14.979	2.62668	746	0.793034	1	GCF_000861905.1_ViralProj15445_genomic.gff:NC_001612.1	five_prime_UTR	NC_001612.1	RBMX	ENSG00000147274
922	4	+	3	1000	1.594	0.932756	77	0.213979	1	GCF_000861905.1_ViralProj15445_genomic.gff:NC_001612.1	three_prime_UTR	NC_001612.1	RBMX	ENSG00000147274
922	4	+	0	1000	1.357	0.869659	40	0.646815	1	GCF_000862105.1_ViralProj15302_genomic.gff:NC_001449.1	five_prime_UTR	NC_001449.1	RBMX	ENSG00000147274
922	4	+	0	1000	0.41	0.555165	114	1	1	GCF_000862105.1_ViralProj15302_genomic.gff:NC_001449.1	three_prime_UTR	NC_001449.1	RBMX	ENSG00000147274
922	4	+	0	1000	0.227	0.419102	90	1	1	GCF_000862125.1_ViralProj15306_genomic.gff:NC_001477.1	five_prime_UTR	NC_001477.1	RBMX	ENSG00000147274
922	4	+	10	1000	9.848	2.30178	458	0.871945	1	GCF_000862125.1_ViralProj15306_genomic.gff:NC_001477.1	three_prime_UTR	NC_001477.1	RBMX	ENSG00000147274
922	4	+	0	1000	0.308	0.461898	125	1	1	GCF_000863165.1_ViralProj15343_genomic.gff:NC_001809.1	five_prime_UTR	NC_001809.1	RBMX	ENSG00000147274
922	4	+	17	1000	14.648	2.60401	493	0.505791	1	GCF_000863165.1_ViralProj15343_genomic.gff:NC_001809.1	three_prime_UTR	NC_001809.1	RBMX	ENSG00000147274
922	4	+	1	1000	0.902	0.746293	72	0.596548	1	GCF_000863385.1_ViralProj15392_genomic.gff:NC_003417.1	five_prime_UTR	NC_003417.1	RBMX	ENSG00000147274
922	4	+	0	1000	0.569	0.620987	97	1	1	GCF_000865065.1_ViralProj15599_genomic.gff:NC_002640.1	five_prime_UTR	NC_002640.1	RBMX	ENSG00000147274
922	4	+	10	1000	9.433	2.23708	380	0.742601	1	GCF_000865065.1_ViralProj15599_genomic.gff:NC_002640.1	three_prime_UTR	NC_002640.1	RBMX	ENSG00000147274
922	4	+	0	1000	0.219	0.413776	90	1	1	GCF_000866625.1_ViralProj15598_genomic.gff:NC_001475.2	five_prime_UTR	NC_001475.2	RBMX	ENSG00000147274
922	4	+	10	1000	8.407	2.16288	436	0.488376	1	GCF_000866625.1_ViralProj15598_genomic.gff:NC_001475.2	three_prime_UTR	NC_001475.2	RBMX	ENSG00000147274
922	4	+	11	1000	8.704	2.05002	336	0.389131	1	GCF_000871165.1_ViralProj20937_genomic.gff:NC_009823.1	five_prime_UTR	NC_009823.1	RBMX	ENSG00000147274
922	4	+	2	1000	2.432	1.22019	265	1	1	GCF_000871165.1_ViralProj20937_genomic.gff:NC_009823.1	three_prime_UTR	NC_009823.1	RBMX	ENSG00000147274
922	4	+	15	1000	18.996	3.21533	1036	0.417352	1	GCF_000871545.1_ViralProj19577_genomic.gff:NC_009448.2	five_prime_UTR	NC_009448.2	RBMX	ENSG00000147274
922	4	+	2	1000	1.185	0.780631	42	0.332889	1	GCF_000871545.1_ViralProj19577_genomic.gff:NC_009448.2	three_prime_UTR	NC_009448.2	RBMX	ENSG00000147274
922	4	+	0	1000	0.273	0.445724	92	1	1	GCF_000871845.1_ViralProj20183_genomic.gff:NC_001474.2	five_prime_UTR	NC_001474.2	RBMX	ENSG00000147274
922	4	+	11	1000	7.634	2.04211	447	0.200406	1	GCF_000871845.1_ViralProj20183_genomic.gff:NC_001474.2	three_prime_UTR	NC_001474.2	RBMX	ENSG00000147274
922	4	+	12	1000	9.663	2.18866	338	0.412532	1	GCF_000872025.1_ViralProj20939_genomic.gff:NC_009827.1	five_prime_UTR	NC_009827.1	RBMX	ENSG00000147274
922	4	+	2	1000	2.397	1.23569	225	1	1	GCF_000872025.1_ViralProj20939_genomic.gff:NC_009827.1	three_prime_UTR	NC_009827.1	RBMX	ENSG00000147274
922	4	+	8	1000	7.009	1.81995	275	0.698891	1	GCF_000873605.1_ViralProj20935_genomic.gff:NC_009826.1	five_prime_UTR	NC_009826.1	RBMX	ENSG00000147274
922	4	+	0	989	0.0869565	0.281914	15	1	1	GCF_000873605.1_ViralProj20935_genomic.gff:NC_009826.1	three_prime_UTR	NC_009826.1	RBMX	ENSG00000147274
922	4	+	8	1000	7.067	1.80382	275	0.700252	1	GCF_000874265.1_ViralProj20933_genomic.gff:NC_009825.1	five_prime_UTR	NC_009825.1	RBMX	ENSG00000147274
922	4	+	0	1000	0.939	0.698403	45	1	1	GCF_000874265.1_ViralProj20933_genomic.gff:NC_009825.1	three_prime_UTR	NC_009825.1	RBMX	ENSG00000147274
922	4	+	10	1000	8.111	2.03244	335	0.473795	1	GCF_000874285.1_ViralProj20941_genomic.gff:NC_009824.1	five_prime_UTR	NC_009824.1	RBMX	ENSG00000147274
922	4	+	0	998	0.287575	0.452859	16	1	1	GCF_000874285.1_ViralProj20941_genomic.gff:NC_009824.1	three_prime_UTR	NC_009824.1	RBMX	ENSG00000147274
922	4	+	1	1000	0.279	0.448732	54	0.244007	1	GCF_000880715.1_ViralProj32327_genomic.gff:NC_011400.1	three_prime_UTR	NC_011400.1	RBMX	ENSG00000147274
922	4	+	14	1000	10.826	2.39739	424	0.351724	1	GCF_000882815.3_ViralProj36615_genomic.gff:NC_012532.1	three_prime_UTR	NC_012532.1	RBMX	ENSG00000147274
922	4	+	15	1000	16.5	2.79961	745	0.803824	1	GCF_000884955.1_ViralProj38499_genomic.gff:NC_012801.1	five_prime_UTR	NC_012801.1	RBMX	ENSG00000147274
922	4	+	18	1000	21.383	3.31712	1160	0.583868	1	GCF_000885595.1_ViralProj38497_genomic.gff:NC_012800.1	five_prime_UTR	NC_012800.1	RBMX	ENSG00000147274
922	4	+	0	1000	0.165	0.371366	34	1	1	GCF_000885815.1_ViralProj39811_genomic.gff:NC_013060.1	five_prime_UTR	NC_013060.1	RBMX	ENSG00000147274
922	4	+	1	1000	0.341	0.474283	94	0.289382	1	GCF_000885815.1_ViralProj39811_genomic.gff:NC_013060.1	three_prime_UTR	NC_013060.1	RBMX	ENSG00000147274
922	4	+	0	1000	1.701	1.0357	134	0.423055	1	GCF_000886455.1_ViralProj38493_genomic.gff:NC_012798.1	five_prime_UTR	NC_012798.1	RBMX	ENSG00000147274
922	4	+	12	1000	13.668	2.75234	743	0.784378	1	GCF_000886475.1_ViralProj38501_genomic.gff:NC_012802.1	five_prime_UTR	NC_012802.1	RBMX	ENSG00000147274
922	4	+	0	1000	0.241	0.427904	36	1	1	GCF_000897955.1_ViralProj178562_genomic.gff:NC_019027.1	five_prime_UTR	NC_019027.1	RBMX	ENSG00000147274
922	4	+	2	1000	2.267	0.998352	111	1	1	GCF_000897955.1_ViralProj178562_genomic.gff:NC_019027.1	three_prime_UTR	NC_019027.1	RBMX	ENSG00000147274
922	4	+	0	1000	1.592	1.00725	274	0.416844	1	GCF_000901155.1_ViralProj183710_genomic.gff:NC_019843.3	five_prime_UTR	NC_019843.3	RBMX	ENSG00000147274
922	4	+	18	1000	14.138	3.03384	1015	0.282712	1	GCF_000901155.1_ViralProj183710_genomic.gff:NC_019843.3	three_prime_UTR	NC_019843.3	RBMX	ENSG00000147274
922	4	+	0	1000	0.493	0.523665	32	1	1	GCF_000901475.1_ViralProj178564_genomic.gff:NC_019026.1	five_prime_UTR	NC_019026.1	RBMX	ENSG00000147274
922	4	+	2	1000	1.323	0.85989	38	0.383307	1	GCF_000917835.1_ViralProj242273_genomic.gff:NC_023812.1	five_prime_UTR	NC_023812.1	RBMX	ENSG00000147274
922	4	+	2	1000	2.332	1.23097	329	1	1	GCF_000917835.1_ViralProj242273_genomic.gff:NC_023812.1	three_prime_UTR	NC_023812.1	RBMX	ENSG00000147274
922	4	+	12	1000	10.469	2.28479	516	0.63695	1	GCF_000921975.1_ViralProj253339_genomic.gff:NC_024377.1	five_prime_UTR	NC_024377.1	RBMX	ENSG00000147274
922	4	+	11	1000	8.068	1.96551	304	0.281084	1	GCF_000921975.1_ViralProj253339_genomic.gff:NC_024377.1	three_prime_UTR	NC_024377.1	RBMX	ENSG00000147274
922	4	+	9	1000	8.61	1.86262	323	0.861829	1	GCF_001310135.2_ViralProj298087_genomic.gff:NC_027998.2	five_prime_UTR	NC_027998.2	RBMX	ENSG00000147274
922	4	+	9	1000	10.228	2.0939	362	0.87346	1	GCF_001310135.2_ViralProj298087_genomic.gff:NC_027998.2	three_prime_UTR	NC_027998.2	RBMX	ENSG00000147274
922	4	+	11	1000	9.294	2.02723	335	0.505653	1	GCF_001712785.1_ViralProj339556_genomic.gff:NC_030791.1	five_prime_UTR	NC_030791.1	RBMX	ENSG00000147274
922	4	+	2	1000	0.448	0.556422	58	0.0742494	0.52611	GCF_001712785.1_ViralProj339556_genomic.gff:NC_030791.1	three_prime_UTR	NC_030791.1	RBMX	ENSG00000147274
922	4	+	4	1000	4.48	1.48317	178	1	1	GCF_002117635.1_ViralProj384965_genomic.gff:NC_034385.1	five_prime_UTR	NC_034385.1	RBMX	ENSG00000147274
922	4	+	14	1000	15.427	2.80509	738	0.897136	1	GCF_002816685.1_ASM281668v1_genomic.gff:NC_038307.1	five_prime_UTR	NC_038307.1	RBMX	ENSG00000147274
922	4	+	1	1000	1.075	0.800009	95	1	1	GCF_002816685.1_ASM281668v1_genomic.gff:NC_038307.1	three_prime_UTR	NC_038307.1	RBMX	ENSG00000147274
922	4	+	13	1000	9.819	2.42861	728	0.330473	1	GCF_002816725.1_ASM281672v1_genomic.gff:NC_038308.1	five_prime_UTR	NC_038308.1	RBMX	ENSG00000147274
922	4	+	0	1000	0.633	0.674363	64	1	1	GCF_002816725.1_ASM281672v1_genomic.gff:NC_038308.1	three_prime_UTR	NC_038308.1	RBMX	ENSG00000147274
922	4	+	11	1000	11.744	2.28685	441	1	1	GCF_002820785.1_ASM282078v1_genomic.gff:NC_038426.1	five_prime_UTR	NC_038426.1	RBMX	ENSG00000147274
922	4	+	2	1000	2.67	1.10468	99	1	1	GCF_002820785.1_ASM282078v1_genomic.gff:NC_038426.1	three_prime_UTR	NC_038426.1	RBMX	ENSG00000147274
922	4	+	9	1000	8.401	1.88461	325	0.727402	1	GCF_002821385.1_ASM282138v1_genomic.gff:NC_038436.1	five_prime_UTR	NC_038436.1	RBMX	ENSG00000147274
922	4	+	1	1000	0.658	0.628833	31	0.48577	1	GCF_002821385.1_ASM282138v1_genomic.gff:NC_038436.1	three_prime_UTR	NC_038436.1	RBMX	ENSG00000147274
922	4	+	1	1000	1.916	1.13147	261	1	1	GCF_009858895.2_ASM985889v3_genomic.gff:NC_045512.2	five_prime_UTR	NC_045512.2	RBMX	ENSG00000147274
922	4	+	4	1000	1.905	1.13634	225	0.125353	0.932365	GCF_009858895.2_ASM985889v3_genomic.gff:NC_045512.2	three_prime_UTR	NC_045512.2	RBMX	ENSG00000147274
99	4	+	0	1000	0.229	0.427483	20	1	1	GCF_000850885.1_ViralProj14831_genomic.gff:NC_003908.1	five_prime_UTR	NC_003908.1	NOVA1	ENSG00000139910
99	4	+	4	1000	3.522	1.52638	297	0.783911	1	GCF_000850885.1_ViralProj14831_genomic.gff:NC_003908.1	three_prime_UTR	NC_003908.1	NOVA1	ENSG00000139910
99	4	+	6	1000	7.595	2.43329	804	0.715126	1	GCF_000853805.1_ViralProj14948_genomic.gff:NC_004421.1	five_prime_UTR	NC_004421.1	NOVA1	ENSG00000139910
99	4	+	2	1000	1.695	1.13016	170	0.688328	1	GCF_000853805.1_ViralProj14948_genomic.gff:NC_004421.1	three_prime_UTR	NC_004421.1	NOVA1	ENSG00000139910
99	4	+	3	1000	2.406	1.3011	282	0.521561	1	GCF_000853865.1_ViralProj14960_genomic.gff:NC_005831.2	five_prime_UTR	NC_005831.2	NOVA1	ENSG00000139910
99	4	+	1	1000	1.867	1.12898	283	1	1	GCF_000853865.1_ViralProj14960_genomic.gff:NC_005831.2	three_prime_UTR	NC_005831.2	NOVA1	ENSG00000139910
99	4	+	0	1000	0.527	0.661596	126	1	1	GCF_000860805.1_ViralProj15370_genomic.gff:NC_003690.1	five_prime_UTR	NC_003690.1	NOVA1	ENSG00000139910
99	4	+	2	1000	3.512	1.65245	564	0.594298	1	GCF_000860805.1_ViralProj15370_genomic.gff:NC_003690.1	three_prime_UTR	NC_003690.1	NOVA1	ENSG00000139910
99	4	+	0	1000	0.562	0.651598	92	1	1	GCF_000861085.1_ViralProj15431_genomic.gff:NC_001563.2	five_prime_UTR	NC_001563.2	NOVA1	ENSG00000139910
99	4	+	0	1000	1.643	1.20041	569	0.420616	1	GCF_000861085.1_ViralProj15431_genomic.gff:NC_001563.2	three_prime_UTR	NC_001563.2	NOVA1	ENSG00000139910
99	4	+	6	1000	5.096	1.95924	738	0.651765	1	GCF_000861165.1_ViralProj15288_genomic.gff:NC_002058.3	five_prime_UTR	NC_002058.3	NOVA1	ENSG00000139910
99	4	+	11	1000	7.503	2.42773	1063	0.195671	1	GCF_000861185.1_ViralProj15292_genomic.gff:NC_001366.1	five_prime_UTR	NC_001366.1	NOVA1	ENSG00000139910
99	4	+	2	1000	3.762	1.73619	698	0.59896	1	GCF_000861505.1_ViralProj15357_genomic.gff:NC_001897.1	five_prime_UTR	NC_001897.1	NOVA1	ENSG00000139910
99	4	+	1	1000	0.466	0.557813	83	0.373316	1	GCF_000861505.1_ViralProj15357_genomic.gff:NC_001897.1	three_prime_UTR	NC_001897.1	NOVA1	ENSG00000139910
99	4	+	2	1000	1.137	1.00261	337	0.314578	1	GCF_000861845.1_ViralProj15432_genomic.gff:NC_004102.1	five_prime_UTR	NC_004102.1	NOVA1	ENSG00000139910
99	4	+	2	1000	1.318	0.986838	265	0.37982	1	GCF_000861845.1_ViralProj15432_genomic.gff:NC_004102.1	three_prime_UTR	NC_004102.1	NOVA1	ENSG00000139910
99	4	+	3	1000	5.116	1.94688	746	0.502656	1	GCF_000861905.1_ViralProj15445_genomic.gff:NC_001612.1	five_prime_UTR	NC_001612.1	NOVA1	ENSG00000139910
99	4	+	0	1000	0.63	0.69107	77	1	1	GCF_000861905.1_ViralProj15445_genomic.gff:NC_001612.1	three_prime_UTR	NC_001612.1	NOVA1	ENSG00000139910
99	4	+	0	1000	0.648	0.694679	114	1	1	GCF_000862105.1_ViralProj15302_genomic.gff:NC_001449.1	three_prime_UTR	NC_001449.1	NOVA1	ENSG00000139910
99	4	+	0	1000	0.545	0.663638	90	1	1	GCF_000862125.1_ViralProj15306_genomic.gff:NC_001477.1	five_prime_UTR	NC_001477.1	NOVA1	ENSG00000139910
99	4	+	3	1000	2.07	1.26993	458	0.4679	1	GCF_000862125.1_ViralProj15306_genomic.gff:NC_001477.1	three_prime_UTR	NC_001477.1	NOVA1	ENSG00000139910
99	4	+	1	1000	0.634	0.700382	125	0.470389	1	GCF_000863165.1_ViralProj15343_genomic.gff:NC_001809.1	five_prime_UTR	NC_001809.1	NOVA1	ENSG00000139910
99	4	+	1	1000	2.571	1.42583	493	0.529688	1	GCF_000863165.1_ViralProj15343_genomic.gff:NC_001809.1	three_prime_UTR	NC_001809.1	NOVA1	ENSG00000139910
99	4	+	1	1000	1.058	0.852856	72	1	1	GCF_000863385.1_ViralProj15392_genomic.gff:NC_003417.1	five_prime_UTR	NC_003417.1	NOVA1	ENSG00000139910
99	4	+	2	1000	1.117	0.654017	62	0.307572	1	GCF_000864005.1_ViralProj15520_genomic.gff:NC_001959.2	three_prime_UTR	NC_001959.2	NOVA1	ENSG00000139910
99	4	+	0	1000	0.714	0.767328	97	1	1	GCF_000865065.1_ViralProj15599_genomic.gff:NC_002640.1	five_prime_UTR	NC_002640.1	NOVA1	ENSG00000139910
99	4	+	1	1000	1.69	1.17443	380	1	1	GCF_000865065.1_ViralProj15599_genomic.gff:NC_002640.1	three_prime_UTR	NC_002640.1	NOVA1	ENSG00000139910
99	4	+	0	1000	0.435	0.608396	90	1	1	GCF_000866625.1_ViralProj15598_genomic.gff:NC_001475.2	five_prime_UTR	NC_001475.2	NOVA1	ENSG00000139910
99	4	+	1	1000	1.306	1.07028	436	1	1	GCF_000866625.1_ViralProj15598_genomic.gff:NC_001475.2	three_prime_UTR	NC_001475.2	NOVA1	ENSG00000139910
99	4	+	2	1000	0.919	0.877045	336	0.234436	1	GCF_000871165.1_ViralProj20937_genomic.gff:NC_009823.1	five_prime_UTR	NC_009823.1	NOVA1	ENSG00000139910
99	4	+	2	1000	2.032	1.15512	265	1	1	GCF_000871165.1_ViralProj20937_genomic.gff:NC_009823.1	three_prime_UTR	NC_009823.1	NOVA1	ENSG00000139910
99	4	+	9	1000	6.784	2.30405	1036	0.335722	1	GCF_000871545.1_ViralProj19577_genomic.gff:NC_009448.2	five_prime_UTR	NC_009448.2	NOVA1	ENSG00000139910
99	4	+	0	1000	1.082	0.812364	42	0.628895	1	GCF_000871545.1_ViralProj19577_genomic.gff:NC_009448.2	three_prime_UTR	NC_009448.2	NOVA1	ENSG00000139910
99	4	+	0	1000	0.559	0.65034	92	1	1	GCF_000871845.1_ViralProj20183_genomic.gff:NC_001474.2	five_prime_UTR	NC_001474.2	NOVA1	ENSG00000139910
99	4	+	2	1000	1.931	1.21808	447	0.719958	1	GCF_000871845.1_ViralProj20183_genomic.gff:NC_001474.2	three_prime_UTR	NC_001474.2	NOVA1	ENSG00000139910
99	4	+	2	1000	1.156	0.984191	338	0.321512	1	GCF_000872025.1_ViralProj20939_genomic.gff:NC_009827.1	five_prime_UTR	NC_009827.1	NOVA1	ENSG00000139910
99	4	+	2	1000	1.456	1.03205	225	0.65991	1	GCF_000872025.1_ViralProj20939_genomic.gff:NC_009827.1	three_prime_UTR	NC_009827.1	NOVA1	ENSG00000139910
99	4	+	1	1000	0.561	0.691923	275	0.429689	1	GCF_000873605.1_ViralProj20935_genomic.gff:NC_009826.1	five_prime_UTR	NC_009826.1	NOVA1	ENSG00000139910
99	4	+	0	989	0.065723	0.247923	15	1	1	GCF_000873605.1_ViralProj20935_genomic.gff:NC_009826.1	three_prime_UTR	NC_009826.1	NOVA1	ENSG00000139910
99	4	+	1	1000	0.641	0.738013	275	0.473629	1	GCF_000874265.1_ViralProj20933_genomic.gff:NC_009825.1	five_prime_UTR	NC_009825.1	NOVA1	ENSG00000139910
99	4	+	0	1000	0.151	0.361012	45	1	1	GCF_000874265.1_ViralProj20933_genomic.gff:NC_009825.1	three_prime_UTR	NC_009825.1	NOVA1	ENSG00000139910
99	4	+	3	1000	1.19	0.962718	335	0.118041	1	GCF_000874285.1_ViralProj20941_genomic.gff:NC_009824.1	five_prime_UTR	NC_009824.1	NOVA1	ENSG00000139910
99	4	+	0	998	0.174349	0.379599	16	1	1	GCF_000874285.1_ViralProj20941_genomic.gff:NC_009824.1	three_prime_UTR	NC_009824.1	NOVA1	ENSG00000139910
99	4	+	0	1000	0.611	0.649693	54	1	1	GCF_000880715.1_ViralProj32327_genomic.gff:NC_011400.1	three_prime_UTR	NC_011400.1	NOVA1	ENSG00000139910
99	4	+	0	1000	0.927	0.824834	102	1	1	GCF_000882815.3_ViralProj36615_genomic.gff:NC_012532.1	five_prime_UTR	NC_012532.1	NOVA1	ENSG00000139910
99	4	+	1	1000	1.661	1.22212	424	1	1	GCF_000882815.3_ViralProj36615_genomic.gff:NC_012532.1	three_prime_UTR	NC_012532.1	NOVA1	ENSG00000139910
99	4	+	3	1000	4.567	1.89924	745	0.638649	1	GCF_000884955.1_ViralProj38499_genomic.gff:NC_012801.1	five_prime_UTR	NC_012801.1	NOVA1	ENSG00000139910
99	4	+	0	1000	1.045	0.741299	77	0.630082	1	GCF_000884955.1_ViralProj38499_genomic.gff:NC_012801.1	three_prime_UTR	NC_012801.1	NOVA1	ENSG00000139910
99	4	+	12	1000	10.303	2.65862	1160	0.530741	1	GCF_000885595.1_ViralProj38497_genomic.gff:NC_012800.1	five_prime_UTR	NC_012800.1	NOVA1	ENSG00000139910
99	4	+	0	1000	0.944	0.738518	89	1	1	GCF_000885595.1_ViralProj38497_genomic.gff:NC_012800.1	three_prime_UTR	NC_012800.1	NOVA1	ENSG00000139910
99	4	+	0	1000	0.152	0.359201	34	1	1	GCF_000885815.1_ViralProj39811_genomic.gff:NC_013060.1	five_prime_UTR	NC_013060.1	NOVA1	ENSG00000139910
99	4	+	1	1000	1.099	0.816005	94	1	1	GCF_000885815.1_ViralProj39811_genomic.gff:NC_013060.1	three_prime_UTR	NC_013060.1	NOVA1	ENSG00000139910
99	4	+	1	1000	1.527	1.01897	134	1	1	GCF_000886455.1_ViralProj38493_genomic.gff:NC_012798.1	five_prime_UTR	NC_012798.1	NOVA1	ENSG00000139910
99	4	+	0	1000	1.16	0.839705	78	0.634068	1	GCF_000886455.1_ViralProj38493_genomic.gff:NC_012798.1	three_prime_UTR	NC_012798.1	NOVA1	ENSG00000139910
99	4	+	7	1000	5.412	1.97437	743	0.510694	1	GCF_000886475.1_ViralProj38501_genomic.gff:NC_012802.1	five_prime_UTR	NC_012802.1	NOVA1	ENSG00000139910
99	4	+	0	1000	1.101	0.795885	83	0.631677	1	GCF_000886475.1_ViralProj38501_genomic.gff:NC_012802.1	three_prime_UTR	NC_012802.1	NOVA1	ENSG00000139910
99	4	+	0	1000	0.4	0.490143	35	1	1	GCF_000895575.1_ViralProj76723_genomic.gff:NC_016155.1	three_prime_UTR	NC_016155.1	NOVA1	ENSG00000139910
99	4	+	0	1000	0.04	0.196057	36	1	1	GCF_000897955.1_ViralProj178562_genomic.gff:NC_019027.1	five_prime_UTR	NC_019027.1	NOVA1	ENSG00000139910
99	4	+	2	1000	1.281	0.912618	111	0.367009	1	GCF_000897955.1_ViralProj178562_genomic.gff:NC_019027.1	three_prime_UTR	NC_019027.1	NOVA1	ENSG00000139910
99	4	+	0	1000	0.595	0.599445	34	1	1	GCF_000899535.1_ViralProj178563_genomic.gff:NC_019028.1	three_prime_UTR	NC_019028.1	NOVA1	ENSG00000139910
99	4	+	3	1000	3.51	1.50205	274	1	1	GCF_000901155.1_ViralProj183710_genomic.gff:NC_019843.3	five_prime_UTR	NC_019843.3	NOVA1	ENSG00000139910
99	4	+	8	1000	7.993	2.48941	1015	1	1	GCF_000901155.1_ViralProj183710_genomic.gff:NC_019843.3	three_prime_UTR	NC_019843.3	NOVA1	ENSG00000139910
99	4	+	0	1000	0.185	0.388492	32	1	1	GCF_000901475.1_ViralProj178564_genomic.gff:NC_019026.1	five_prime_UTR	NC_019026.1	NOVA1	ENSG00000139910
99	4	+	0	1000	1.13	0.867094	91	0.632988	1	GCF_000901475.1_ViralProj178564_genomic.gff:NC_019026.1	three_prime_UTR	NC_019026.1	NOVA1	ENSG00000139910
99	4	+	0	1000	0.24	0.436567	38	1	1	GCF_000917835.1_ViralProj242273_genomic.gff:NC_023812.1	five_prime_UTR	NC_023812.1	NOVA1	ENSG00000139910
99	4	+	4	1000	1.692	1.12535	329	0.0914943	0.966418	GCF_000917835.1_ViralProj242273_genomic.gff:NC_023812.1	three_prime_UTR	NC_023812.1	NOVA1	ENSG00000139910
99	4	+	4	1000	2.277	1.38282	516	0.297746	1	GCF_000921975.1_ViralProj253339_genomic.gff:NC_024377.1	five_prime_UTR	NC_024377.1	NOVA1	ENSG00000139910
99	4	+	1	1000	0.961	0.937207	304	0.618072	1	GCF_000921975.1_ViralProj253339_genomic.gff:NC_024377.1	three_prime_UTR	NC_024377.1	NOVA1	ENSG00000139910
99	4	+	2	1000	1.415	1.08441	323	0.655819	1	GCF_001310135.2_ViralProj298087_genomic.gff:NC_027998.2	five_prime_UTR	NC_027998.2	NOVA1	ENSG00000139910
99	4	+	2	1000	1.787	1.21206	362	0.700589	1	GCF_001310135.2_ViralProj298087_genomic.gff:NC_027998.2	three_prime_UTR	NC_027998.2	NOVA1	ENSG00000139910
99	4	+	2	1000	1.172	1.00868	335	0.327339	1	GCF_001712785.1_ViralProj339556_genomic.gff:NC_030791.1	five_prime_UTR	NC_030791.1	NOVA1	ENSG00000139910
99	4	+	0	1000	0.233	0.441481	58	1	1	GCF_001712785.1_ViralProj339556_genomic.gff:NC_030791.1	three_prime_UTR	NC_030791.1	NOVA1	ENSG00000139910
99	4	+	1	1000	0.939	0.90338	178	0.609952	1	GCF_002117635.1_ViralProj384965_genomic.gff:NC_034385.1	five_prime_UTR	NC_034385.1	NOVA1	ENSG00000139910
99	4	+	0	1000	2.2	0.902671	83	0.177436	1	GCF_002117635.1_ViralProj384965_genomic.gff:NC_034385.1	three_prime_UTR	NC_034385.1	NOVA1	ENSG00000139910
99	4	+	5	1000	5.094	1.98673	738	1	1	GCF_002816685.1_ASM281668v1_genomic.gff:NC_038307.1	five_prime_UTR	NC_038307.1	NOVA1	ENSG00000139910
99	4	+	0	1000	0.282	0.496712	95	1	1	GCF_002816685.1_ASM281668v1_genomic.gff:NC_038307.1	three_prime_UTR	NC_038307.1	NOVA1	ENSG00000139910
99	4	+	6	1000	4.321	1.86533	728	0.336628	1	GCF_002816725.1_ASM281672v1_genomic.gff:NC_038308.1	five_prime_UTR	NC_038308.1	NOVA1	ENSG00000139910
99	4	+	2	1000	0.416	0.570324	64	0.0653673	1	GCF_002816725.1_ASM281672v1_genomic.gff:NC_038308.1	three_prime_UTR	NC_038308.1	NOVA1	ENSG00000139910
99	4	+	4	1000	2.381	1.37249	441	0.308829	1	GCF_002820785.1_ASM282078v1_genomic.gff:NC_038426.1	five_prime_UTR	NC_038426.1	NOVA1	ENSG00000139910
99	4	+	0	1000	0.103	0.304111	99	1	1	GCF_002820785.1_ASM282078v1_genomic.gff:NC_038426.1	three_prime_UTR	NC_038426.1	NOVA1	ENSG00000139910
99	4	+	2	1000	1.441	1.0889	325	0.658505	1	GCF_002821385.1_ASM282138v1_genomic.gff:NC_038436.1	five_prime_UTR	NC_038436.1	NOVA1	ENSG00000139910
99	4	+	0	1000	0.39	0.534964	31	1	1	GCF_002821385.1_ASM282138v1_genomic.gff:NC_038436.1	three_prime_UTR	NC_038436.1	NOVA1	ENSG00000139910
99	4	+	3	1000	2.964	1.45424	261	0.772822	1	GCF_009858895.2_ASM985889v3_genomic.gff:NC_045512.2	five_prime_UTR	NC_045512.2	NOVA1	ENSG00000139910
99	4	+	1	1000	0.518	0.690038	225	0.404645	1	GCF_009858895.2_ASM985889v3_genomic.gff:NC_045512.2	three_prime_UTR	NC_045512.2	NOVA1	ENSG00000139910
M026_0.6	7	+	0	1000	0.052	0.2266	17	1	1	GCF_000850885.1_ViralProj14831_genomic.gff:NC_003908.1	five_prime_UTR	NC_003908.1	HNRNPK	ENSG00000165119
M026_0.6	7	+	0	1000	0.006	0.0772656	294	1	1	GCF_000850885.1_ViralProj14831_genomic.gff:NC_003908.1	three_prime_UTR	NC_003908.1	HNRNPK	ENSG00000165119
M026_0.6	7	+	2	1000	0.436	0.665091	801	0.0714136	1	GCF_000853805.1_ViralProj14948_genomic.gff:NC_004421.1	five_prime_UTR	NC_004421.1	HNRNPK	ENSG00000165119
M026_0.6	7	+	0	1000	0.122	0.330492	167	1	1	GCF_000853805.1_ViralProj14948_genomic.gff:NC_004421.1	three_prime_UTR	NC_004421.1	HNRNPK	ENSG00000165119
M026_0.6	7	+	0	1000	0.002	0.044699	279	1	1	GCF_000853865.1_ViralProj14960_genomic.gff:NC_005831.2	five_prime_UTR	NC_005831.2	HNRNPK	ENSG00000165119
M026_0.6	7	+	0	1000	0.02	0.14007	280	1	1	GCF_000853865.1_ViralProj14960_genomic.gff:NC_005831.2	three_prime_UTR	NC_005831.2	HNRNPK	ENSG00000165119
M026_0.6	7	+	0	1000	0.44	0.629918	561	1	1	GCF_000860805.1_ViralProj15370_genomic.gff:NC_003690.1	three_prime_UTR	NC_003690.1	HNRNPK	ENSG00000165119
M026_0.6	7	+	0	1000	0.258	0.477141	566	1	1	GCF_000861085.1_ViralProj15431_genomic.gff:NC_001563.2	three_prime_UTR	NC_001563.2	HNRNPK	ENSG00000165119
M026_0.6	7	+	0	1000	0.324	0.566873	735	1	1	GCF_000861165.1_ViralProj15288_genomic.gff:NC_002058.3	five_prime_UTR	NC_002058.3	HNRNPK	ENSG00000165119
M026_0.6	7	+	2	1000	0.761	0.854757	1060	0.177232	1	GCF_000861185.1_ViralProj15292_genomic.gff:NC_001366.1	five_prime_UTR	NC_001366.1	HNRNPK	ENSG00000165119
M026_0.6	7	+	1	1000	0.402	0.613818	695	0.331097	1	GCF_000861505.1_ViralProj15357_genomic.gff:NC_001897.1	five_prime_UTR	NC_001897.1	HNRNPK	ENSG00000165119
M026_0.6	7	+	0	1000	0.156	0.387058	334	1	1	GCF_000861845.1_ViralProj15432_genomic.gff:NC_004102.1	five_prime_UTR	NC_004102.1	HNRNPK	ENSG00000165119
M026_0.6	7	+	0	1000	0.014	0.117549	262	1	1	GCF_000861845.1_ViralProj15432_genomic.gff:NC_004102.1	three_prime_UTR	NC_004102.1	HNRNPK	ENSG00000165119
M026_0.6	7	+	0	1000	0.343	0.568924	743	1	1	GCF_000861905.1_ViralProj15445_genomic.gff:NC_001612.1	five_prime_UTR	NC_001612.1	HNRNPK	ENSG00000165119
M026_0.6	7	+	0	1000	0.057	0.236235	74	1	1	GCF_000861905.1_ViralProj15445_genomic.gff:NC_001612.1	three_prime_UTR	NC_001612.1	HNRNPK	ENSG00000165119
M026_0.6	7	+	1	1000	0.073	0.267848	37	0.0704662	1	GCF_000862105.1_ViralProj15302_genomic.gff:NC_001449.1	five_prime_UTR	NC_001449.1	HNRNPK	ENSG00000165119
M026_0.6	7	+	0	1000	0.001	0.0316228	111	1	1	GCF_000862105.1_ViralProj15302_genomic.gff:NC_001449.1	three_prime_UTR	NC_001449.1	HNRNPK	ENSG00000165119
M026_0.6	7	+	0	1000	0.299	0.549455	455	1	1	GCF_000862125.1_ViralProj15306_genomic.gff:NC_001477.1	three_prime_UTR	NC_001477.1	HNRNPK	ENSG00000165119
M026_0.6	7	+	0	1000	0.401	0.608744	490	1	1	GCF_000863165.1_ViralProj15343_genomic.gff:NC_001809.1	three_prime_UTR	NC_001809.1	HNRNPK	ENSG00000165119
M026_0.6	7	+	0	1000	0.01	0.0995485	69	1	1	GCF_000863385.1_ViralProj15392_genomic.gff:NC_003417.1	five_prime_UTR	NC_003417.1	HNRNPK	ENSG00000165119
M026_0.6	7	+	0	1000	0.002	0.044699	94	1	1	GCF_000865065.1_ViralProj15599_genomic.gff:NC_002640.1	five_prime_UTR	NC_002640.1	HNRNPK	ENSG00000165119
M026_0.6	7	+	0	1000	0.293	0.541705	377	1	1	GCF_000865065.1_ViralProj15599_genomic.gff:NC_002640.1	three_prime_UTR	NC_002640.1	HNRNPK	ENSG00000165119
M026_0.6	7	+	0	1000	0.178	0.415317	433	1	1	GCF_000866625.1_ViralProj15598_genomic.gff:NC_001475.2	three_prime_UTR	NC_001475.2	HNRNPK	ENSG00000165119
M026_0.6	7	+	0	1000	0.17	0.406528	333	1	1	GCF_000871165.1_ViralProj20937_genomic.gff:NC_009823.1	five_prime_UTR	NC_009823.1	HNRNPK	ENSG00000165119
M026_0.6	7	+	0	1000	0.016	0.125538	262	1	1	GCF_000871165.1_ViralProj20937_genomic.gff:NC_009823.1	three_prime_UTR	NC_009823.1	HNRNPK	ENSG00000165119
M026_0.6	7	+	1	1000	0.674	0.798976	1033	0.490446	1	GCF_000871545.1_ViralProj19577_genomic.gff:NC_009448.2	five_prime_UTR	NC_009448.2	HNRNPK	ENSG00000165119
M026_0.6	7	+	0	1000	0.022	0.146757	39	1	1	GCF_000871545.1_ViralProj19577_genomic.gff:NC_009448.2	three_prime_UTR	NC_009448.2	HNRNPK	ENSG00000165119
M026_0.6	7	+	0	1000	0.214	0.484188	444	1	1	GCF_000871845.1_ViralProj20183_genomic.gff:NC_001474.2	three_prime_UTR	NC_001474.2	HNRNPK	ENSG00000165119
M026_0.6	7	+	0	1000	0.178	0.415317	335	1	1	GCF_000872025.1_ViralProj20939_genomic.gff:NC_009827.1	five_prime_UTR	NC_009827.1	HNRNPK	ENSG00000165119
M026_0.6	7	+	0	1000	0.02	0.14007	222	1	1	GCF_000872025.1_ViralProj20939_genomic.gff:NC_009827.1	three_prime_UTR	NC_009827.1	HNRNPK	ENSG00000165119
M026_0.6	7	+	0	1000	0.082	0.28872	272	1	1	GCF_000873605.1_ViralProj20935_genomic.gff:NC_009826.1	five_prime_UTR	NC_009826.1	HNRNPK	ENSG00000165119
M026_0.6	7	+	0	1000	0.107	0.331151	272	1	1	GCF_000874265.1_ViralProj20933_genomic.gff:NC_009825.1	five_prime_UTR	NC_009825.1	HNRNPK	ENSG00000165119
M026_0.6	7	+	0	1000	0.01	0.0995485	42	1	1	GCF_000874265.1_ViralProj20933_genomic.gff:NC_009825.1	three_prime_UTR	NC_009825.1	HNRNPK	ENSG00000165119
M026_0.6	7	+	0	1000	0.146	0.375266	332	1	1	GCF_000874285.1_ViralProj20941_genomic.gff:NC_009824.1	five_prime_UTR	NC_009824.1	HNRNPK	ENSG00000165119
M026_0.6	7	+	0	1000	0.295	0.551615	421	1	1	GCF_000882815.3_ViralProj36615_genomic.gff:NC_012532.1	three_prime_UTR	NC_012532.1	HNRNPK	ENSG00000165119
M026_0.6	7	+	0	1000	0.475	0.66016	742	1	1	GCF_000884955.1_ViralProj38499_genomic.gff:NC_012801.1	five_prime_UTR	NC_012801.1	HNRNPK	ENSG00000165119
M026_0.6	7	+	0	1000	0.417	0.6415	1157	1	1	GCF_000885595.1_ViralProj38497_genomic.gff:NC_012800.1	five_prime_UTR	NC_012800.1	HNRNPK	ENSG00000165119
M026_0.6	7	+	0	1000	0.025	0.156203	131	1	1	GCF_000886455.1_ViralProj38493_genomic.gff:NC_012798.1	five_prime_UTR	NC_012798.1	HNRNPK	ENSG00000165119
M026_0.6	7	+	0	1000	0.294	0.540237	740	1	1	GCF_000886475.1_ViralProj38501_genomic.gff:NC_012802.1	five_prime_UTR	NC_012802.1	HNRNPK	ENSG00000165119
M026_0.6	7	+	0	1000	0.004	0.0631505	33	1	1	GCF_000897955.1_ViralProj178562_genomic.gff:NC_019027.1	five_prime_UTR	NC_019027.1	HNRNPK	ENSG00000165119
M026_0.6	7	+	0	1000	0.046	0.214313	108	1	1	GCF_000897955.1_ViralProj178562_genomic.gff:NC_019027.1	three_prime_UTR	NC_019027.1	HNRNPK	ENSG00000165119
M026_0.6	7	+	0	1000	0.025	0.156203	271	1	1	GCF_000901155.1_ViralProj183710_genomic.gff:NC_019843.3	five_prime_UTR	NC_019843.3	HNRNPK	ENSG00000165119
M026_0.6	7	+	0	1000	0.456	0.654593	1012	1	1	GCF_000901155.1_ViralProj183710_genomic.gff:NC_019843.3	three_prime_UTR	NC_019843.3	HNRNPK	ENSG00000165119
M026_0.6	7	+	0	1000	0.003	0.0547174	29	1	1	GCF_000901475.1_ViralProj178564_genomic.gff:NC_019026.1	five_prime_UTR	NC_019026.1	HNRNPK	ENSG00000165119
M026_0.6	7	+	0	1000	0.1	0.306748	35	1	1	GCF_000917835.1_ViralProj242273_genomic.gff:NC_023812.1	five_prime_UTR	NC_023812.1	HNRNPK	ENSG00000165119
M026_0.6	7	+	0	1000	0.033	0.178726	326	1	1	GCF_000917835.1_ViralProj242273_genomic.gff:NC_023812.1	three_prime_UTR	NC_023812.1	HNRNPK	ENSG00000165119
M026_0.6	7	+	0	1000	0.232	0.504411	513	1	1	GCF_000921975.1_ViralProj253339_genomic.gff:NC_024377.1	five_prime_UTR	NC_024377.1	HNRNPK	ENSG00000165119
M026_0.6	7	+	0	1000	0.229	0.480406	301	1	1	GCF_000921975.1_ViralProj253339_genomic.gff:NC_024377.1	three_prime_UTR	NC_024377.1	HNRNPK	ENSG00000165119
M026_0.6	7	+	0	1000	0.138	0.356487	320	1	1	GCF_001310135.2_ViralProj298087_genomic.gff:NC_027998.2	five_prime_UTR	NC_027998.2	HNRNPK	ENSG00000165119
M026_0.6	7	+	0	1000	0.266	0.515276	359	1	1	GCF_001310135.2_ViralProj298087_genomic.gff:NC_027998.2	three_prime_UTR	NC_027998.2	HNRNPK	ENSG00000165119
M026_0.6	7	+	0	1000	0.137	0.363818	332	1	1	GCF_001712785.1_ViralProj339556_genomic.gff:NC_030791.1	five_prime_UTR	NC_030791.1	HNRNPK	ENSG00000165119
M026_0.6	7	+	0	1000	0.003	0.0547174	55	1	1	GCF_001712785.1_ViralProj339556_genomic.gff:NC_030791.1	three_prime_UTR	NC_030791.1	HNRNPK	ENSG00000165119
M026_0.6	7	+	0	1000	0.142	0.382076	175	1	1	GCF_002117635.1_ViralProj384965_genomic.gff:NC_034385.1	five_prime_UTR	NC_034385.1	HNRNPK	ENSG00000165119
M026_0.6	7	+	0	1000	0.363	0.586152	735	1	1	GCF_002816685.1_ASM281668v1_genomic.gff:NC_038307.1	five_prime_UTR	NC_038307.1	HNRNPK	ENSG00000165119
M026_0.6	7	+	0	1000	0.018	0.133018	92	1	1	GCF_002816685.1_ASM281668v1_genomic.gff:NC_038307.1	three_prime_UTR	NC_038307.1	HNRNPK	ENSG00000165119
M026_0.6	7	+	0	1000	0.248	0.488605	725	1	1	GCF_002816725.1_ASM281672v1_genomic.gff:NC_038308.1	five_prime_UTR	NC_038308.1	HNRNPK	ENSG00000165119
M026_0.6	7	+	0	1000	0.014	0.117549	61	1	1	GCF_002816725.1_ASM281672v1_genomic.gff:NC_038308.1	three_prime_UTR	NC_038308.1	HNRNPK	ENSG00000165119
M026_0.6	7	+	1	1000	0.181	0.420018	438	0.165596	1	GCF_002820785.1_ASM282078v1_genomic.gff:NC_038426.1	five_prime_UTR	NC_038426.1	HNRNPK	ENSG00000165119
M026_0.6	7	+	0	1000	0.106	0.311225	96	1	1	GCF_002820785.1_ASM282078v1_genomic.gff:NC_038426.1	three_prime_UTR	NC_038426.1	HNRNPK	ENSG00000165119
M026_0.6	7	+	0	1000	0.122	0.333507	322	1	1	GCF_002821385.1_ASM282138v1_genomic.gff:NC_038436.1	five_prime_UTR	NC_038436.1	HNRNPK	ENSG00000165119
M026_0.6	7	+	0	1000	0.009	0.0944877	28	1	1	GCF_002821385.1_ASM282138v1_genomic.gff:NC_038436.1	three_prime_UTR	NC_038436.1	HNRNPK	ENSG00000165119
M026_0.6	7	+	0	1000	0.023	0.149978	258	1	1	GCF_009858895.2_ASM985889v3_genomic.gff:NC_045512.2	five_prime_UTR	NC_045512.2	HNRNPK	ENSG00000165119
M026_0.6	7	+	0	1000	0.054	0.226131	222	1	1	GCF_009858895.2_ASM985889v3_genomic.gff:NC_045512.2	three_prime_UTR	NC_045512.2	HNRNPK	ENSG00000165119
M027_0.6	7	+	0	1000	0.003	0.0547174	17	1	1	GCF_000850885.1_ViralProj14831_genomic.gff:NC_003908.1	five_prime_UTR	NC_003908.1	HNRNPL	ENSG00000104824
M027_0.6	7	+	0	1000	0.545	0.754018	294	1	1	GCF_000850885.1_ViralProj14831_genomic.gff:NC_003908.1	three_prime_UTR	NC_003908.1	HNRNPL	ENSG00000104824
M027_0.6	7	+	0	1000	0.25	0.54754	801	1	1	GCF_000853805.1_ViralProj14948_genomic.gff:NC_004421.1	five_prime_UTR	NC_004421.1	HNRNPL	ENSG00000104824
M027_0.6	7	+	0	1000	0.021	0.169079	167	1	1	GCF_000853805.1_ViralProj14948_genomic.gff:NC_004421.1	three_prime_UTR	NC_004421.1	HNRNPL	ENSG00000104824
M027_0.6	7	+	0	1000	0.058	0.262116	279	1	1	GCF_000853865.1_ViralProj14960_genomic.gff:NC_005831.2	five_prime_UTR	NC_005831.2	HNRNPL	ENSG00000104824
M027_0.6	7	+	1	1000	0.126	0.369134	280	0.11841	1	GCF_000853865.1_ViralProj14960_genomic.gff:NC_005831.2	three_prime_UTR	NC_005831.2	HNRNPL	ENSG00000104824
M027_0.6	7	+	0	1000	0.011	0.104355	123	1	1	GCF_000860805.1_ViralProj15370_genomic.gff:NC_003690.1	five_prime_UTR	NC_003690.1	HNRNPL	ENSG00000104824
M027_0.6	7	+	1	1000	0.244	0.552059	561	0.216554	1	GCF_000860805.1_ViralProj15370_genomic.gff:NC_003690.1	three_prime_UTR	NC_003690.1	HNRNPL	ENSG00000104824
M027_0.6	7	+	0	1000	0.044	0.236897	89	1	1	GCF_000861085.1_ViralProj15431_genomic.gff:NC_001563.2	five_prime_UTR	NC_001563.2	HNRNPL	ENSG00000104824
M027_0.6	7	+	0	1000	0.235	0.505995	566	1	1	GCF_000861085.1_ViralProj15431_genomic.gff:NC_001563.2	three_prime_UTR	NC_001563.2	HNRNPL	ENSG00000104824
M027_0.6	7	+	0	1000	0.26	0.526001	735	1	1	GCF_000861165.1_ViralProj15288_genomic.gff:NC_002058.3	five_prime_UTR	NC_002058.3	HNRNPL	ENSG00000104824
M027_0.6	7	+	1	1000	0.191	0.492709	1060	0.173882	1	GCF_000861185.1_ViralProj15292_genomic.gff:NC_001366.1	five_prime_UTR	NC_001366.1	HNRNPL	ENSG00000104824
M027_0.6	7	+	0	1000	0.292	0.590834	695	1	1	GCF_000861505.1_ViralProj15357_genomic.gff:NC_001897.1	five_prime_UTR	NC_001897.1	HNRNPL	ENSG00000104824
M027_0.6	7	+	0	1000	0.025	0.156203	80	1	1	GCF_000861505.1_ViralProj15357_genomic.gff:NC_001897.1	three_prime_UTR	NC_001897.1	HNRNPL	ENSG00000104824
M027_0.6	7	+	0	1000	0.029	0.16789	334	1	1	GCF_000861845.1_ViralProj15432_genomic.gff:NC_004102.1	five_prime_UTR	NC_004102.1	HNRNPL	ENSG00000104824
M027_0.6	7	+	0	1000	0.002	0.044699	262	1	1	GCF_000861845.1_ViralProj15432_genomic.gff:NC_004102.1	three_prime_UTR	NC_004102.1	HNRNPL	ENSG00000104824
M027_0.6	7	+	0	1000	0.266	0.543635	743	1	1	GCF_000861905.1_ViralProj15445_genomic.gff:NC_001612.1	five_prime_UTR	NC_001612.1	HNRNPL	ENSG00000104824
M027_0.6	7	+	0	1000	0.024	0.165685	74	1	1	GCF_000861905.1_ViralProj15445_genomic.gff:NC_001612.1	three_prime_UTR	NC_001612.1	HNRNPL	ENSG00000104824
M027_0.6	7	+	0	1000	0.017	0.129336	37	1	1	GCF_000862105.1_ViralProj15302_genomic.gff:NC_001449.1	five_prime_UTR	NC_001449.1	HNRNPL	ENSG00000104824
M027_0.6	7	+	0	1000	0.001	0.0316228	111	1	1	GCF_000862105.1_ViralProj15302_genomic.gff:NC_001449.1	three_prime_UTR	NC_001449.1	HNRNPL	ENSG00000104824
M027_0.6	7	+	0	1000	0.009	0.0944877	87	1	1	GCF_000862125.1_ViralProj15306_genomic.gff:NC_001477.1	five_prime_UTR	NC_001477.1	HNRNPL	ENSG00000104824
M027_0.6	7	+	0	1000	0.335	0.622224	455	1	1	GCF_000862125.1_ViralProj15306_genomic.gff:NC_001477.1	three_prime_UTR	NC_001477.1	HNRNPL	ENSG00000104824
M027_0.6	7	+	0	1000	0.033	0.184242	122	1	1	GCF_000863165.1_ViralProj15343_genomic.gff:NC_001809.1	five_prime_UTR	NC_001809.1	HNRNPL	ENSG00000104824
M027_0.6	7	+	0	1000	0.232	0.535222	490	1	1	GCF_000863165.1_ViralProj15343_genomic.gff:NC_001809.1	three_prime_UTR	NC_001809.1	HNRNPL	ENSG00000104824
M027_0.6	7	+	0	1000	0.008	0.0891288	69	1	1	GCF_000863385.1_ViralProj15392_genomic.gff:NC_003417.1	five_prime_UTR	NC_003417.1	HNRNPL	ENSG00000104824
M027_0.6	7	+	0	1000	0.053	0.249506	94	1	1	GCF_000865065.1_ViralProj15599_genomic.gff:NC_002640.1	five_prime_UTR	NC_002640.1	HNRNPL	ENSG00000104824
M027_0.6	7	+	1	1000	0.235	0.534847	377	0.209487	1	GCF_000865065.1_ViralProj15599_genomic.gff:NC_002640.1	three_prime_UTR	NC_002640.1	HNRNPL	ENSG00000104824
M027_0.6	7	+	0	1000	0.01	0.109142	87	1	1	GCF_000866625.1_ViralProj15598_genomic.gff:NC_001475.2	five_prime_UTR	NC_001475.2	HNRNPL	ENSG00000104824
M027_0.6	7	+	0	1000	0.135	0.403656	433	1	1	GCF_000866625.1_ViralProj15598_genomic.gff:NC_001475.2	three_prime_UTR	NC_001475.2	HNRNPL	ENSG00000104824
M027_0.6	7	+	0	1000	0.018	0.133018	333	1	1	GCF_000871165.1_ViralProj20937_genomic.gff:NC_009823.1	five_prime_UTR	NC_009823.1	HNRNPL	ENSG00000104824
M027_0.6	7	+	0	1000	0.016	0.125538	262	1	1	GCF_000871165.1_ViralProj20937_genomic.gff:NC_009823.1	three_prime_UTR	NC_009823.1	HNRNPL	ENSG00000104824
M027_0.6	7	+	0	1000	0.192	0.470486	1033	1	1	GCF_000871545.1_ViralProj19577_genomic.gff:NC_009448.2	five_prime_UTR	NC_009448.2	HNRNPL	ENSG00000104824
M027_0.6	7	+	0	1000	0.002	0.044699	39	1	1	GCF_000871545.1_ViralProj19577_genomic.gff:NC_009448.2	three_prime_UTR	NC_009448.2	HNRNPL	ENSG00000104824
M027_0.6	7	+	0	1000	0.014	0.117549	89	1	1	GCF_000871845.1_ViralProj20183_genomic.gff:NC_001474.2	five_prime_UTR	NC_001474.2	HNRNPL	ENSG00000104824
M027_0.6	7	+	0	1000	0.167	0.446442	444	1	1	GCF_000871845.1_ViralProj20183_genomic.gff:NC_001474.2	three_prime_UTR	NC_001474.2	HNRNPL	ENSG00000104824
M027_0.6	7	+	0	1000	0.035	0.204492	335	1	1	GCF_000872025.1_ViralProj20939_genomic.gff:NC_009827.1	five_prime_UTR	NC_009827.1	HNRNPL	ENSG00000104824
M027_0.6	7	+	0	1000	0.007	0.0946571	222	1	1	GCF_000872025.1_ViralProj20939_genomic.gff:NC_009827.1	three_prime_UTR	NC_009827.1	HNRNPL	ENSG00000104824
M027_0.6	7	+	0	1000	0.006	0.0772656	272	1	1	GCF_000873605.1_ViralProj20935_genomic.gff:NC_009826.1	five_prime_UTR	NC_009826.1	HNRNPL	ENSG00000104824
M027_0.6	7	+	0	1000	0.006	0.0772656	272	1	1	GCF_000874265.1_ViralProj20933_genomic.gff:NC_009825.1	five_prime_UTR	NC_009825.1	HNRNPL	ENSG00000104824
M027_0.6	7	+	0	1000	0.001	0.0316228	42	1	1	GCF_000874265.1_ViralProj20933_genomic.gff:NC_009825.1	three_prime_UTR	NC_009825.1	HNRNPL	ENSG00000104824
M027_0.6	7	+	0	1000	0.024	0.159529	332	1	1	GCF_000874285.1_ViralProj20941_genomic.gff:NC_009824.1	five_prime_UTR	NC_009824.1	HNRNPL	ENSG00000104824
M027_0.6	7	+	0	998	0.00400802	0.0632136	13	1	1	GCF_000874285.1_ViralProj20941_genomic.gff:NC_009824.1	three_prime_UTR	NC_009824.1	HNRNPL	ENSG00000104824
M027_0.6	7	+	0	1000	0.027	0.174073	99	1	1	GCF_000882815.3_ViralProj36615_genomic.gff:NC_012532.1	five_prime_UTR	NC_012532.1	HNRNPL	ENSG00000104824
M027_0.6	7	+	0	1000	0.127	0.388616	421	1	1	GCF_000882815.3_ViralProj36615_genomic.gff:NC_012532.1	three_prime_UTR	NC_012532.1	HNRNPL	ENSG00000104824
M027_0.6	7	+	0	1000	0.342	0.638313	742	1	1	GCF_000884955.1_ViralProj38499_genomic.gff:NC_012801.1	five_prime_UTR	NC_012801.1	HNRNPL	ENSG00000104824
M027_0.6	7	+	0	1000	0.495	0.735198	1157	1	1	GCF_000885595.1_ViralProj38497_genomic.gff:NC_012800.1	five_prime_UTR	NC_012800.1	HNRNPL	ENSG00000104824
M027_0.6	7	+	0	1000	0.088	0.310407	131	1	1	GCF_000886455.1_ViralProj38493_genomic.gff:NC_012798.1	five_prime_UTR	NC_012798.1	HNRNPL	ENSG00000104824
M027_0.6	7	+	0	1000	0.011	0.104355	75	1	1	GCF_000886455.1_ViralProj38493_genomic.gff:NC_012798.1	three_prime_UTR	NC_012798.1	HNRNPL	ENSG00000104824
M027_0.6	7	+	0	1000	0.264	0.580207	740	1	1	GCF_000886475.1_ViralProj38501_genomic.gff:NC_012802.1	five_prime_UTR	NC_012802.1	HNRNPL	ENSG00000104824
M027_0.6	7	+	0	1000	0.016	0.125538	80	1	1	GCF_000886475.1_ViralProj38501_genomic.gff:NC_012802.1	three_prime_UTR	NC_012802.1	HNRNPL	ENSG00000104824
M027_0.6	7	+	0	1000	0.003	0.0547174	108	1	1	GCF_000897955.1_ViralProj178562_genomic.gff:NC_019027.1	three_prime_UTR	NC_019027.1	HNRNPL	ENSG00000104824
M027_0.6	7	+	0	1000	0.057	0.244562	271	1	1	GCF_000901155.1_ViralProj183710_genomic.gff:NC_019843.3	five_prime_UTR	NC_019843.3	HNRNPL	ENSG00000104824
M027_0.6	7	+	0	1000	0.58	0.807621	1012	1	1	GCF_000901155.1_ViralProj183710_genomic.gff:NC_019843.3	three_prime_UTR	NC_019843.3	HNRNPL	ENSG00000104824
M027_0.6	7	+	0	1000	0.02	0.1537	88	1	1	GCF_000901475.1_ViralProj178564_genomic.gff:NC_019026.1	three_prime_UTR	NC_019026.1	HNRNPL	ENSG00000104824
M027_0.6	7	+	0	1000	0.002	0.044699	35	1	1	GCF_000917835.1_ViralProj242273_genomic.gff:NC_023812.1	five_prime_UTR	NC_023812.1	HNRNPL	ENSG00000104824
M027_0.6	7	+	0	1000	0.189	0.43528	326	1	1	GCF_000917835.1_ViralProj242273_genomic.gff:NC_023812.1	three_prime_UTR	NC_023812.1	HNRNPL	ENSG00000104824
M027_0.6	7	+	0	1000	0.078	0.306611	513	1	1	GCF_000921975.1_ViralProj253339_genomic.gff:NC_024377.1	five_prime_UTR	NC_024377.1	HNRNPL	ENSG00000104824
M027_0.6	7	+	0	1000	0.013	0.121844	301	1	1	GCF_000921975.1_ViralProj253339_genomic.gff:NC_024377.1	three_prime_UTR	NC_024377.1	HNRNPL	ENSG00000104824
M027_0.6	7	+	0	1000	0.074	0.280362	320	1	1	GCF_001310135.2_ViralProj298087_genomic.gff:NC_027998.2	five_prime_UTR	NC_027998.2	HNRNPL	ENSG00000104824
M027_0.6	7	+	0	1000	0.111	0.344671	359	1	1	GCF_001310135.2_ViralProj298087_genomic.gff:NC_027998.2	three_prime_UTR	NC_027998.2	HNRNPL	ENSG00000104824
M027_0.6	7	+	0	1000	0.029	0.16789	332	1	1	GCF_001712785.1_ViralProj339556_genomic.gff:NC_030791.1	five_prime_UTR	NC_030791.1	HNRNPL	ENSG00000104824
M027_0.6	7	+	0	1000	0.008	0.0891288	55	1	1	GCF_001712785.1_ViralProj339556_genomic.gff:NC_030791.1	three_prime_UTR	NC_030791.1	HNRNPL	ENSG00000104824
M027_0.6	7	+	0	1000	0.046	0.214313	175	1	1	GCF_002117635.1_ViralProj384965_genomic.gff:NC_034385.1	five_prime_UTR	NC_034385.1	HNRNPL	ENSG00000104824
M027_0.6	7	+	0	1000	0.026	0.171328	80	1	1	GCF_002117635.1_ViralProj384965_genomic.gff:NC_034385.1	three_prime_UTR	NC_034385.1	HNRNPL	ENSG00000104824
M027_0.6	7	+	3	1000	0.435	0.707301	735	0.00990751	1	GCF_002816685.1_ASM281668v1_genomic.gff:NC_038307.1	five_prime_UTR	NC_038307.1	HNRNPL	ENSG00000104824
M027_0.6	7	+	0	1000	0.017	0.136857	92	1	1	GCF_002816685.1_ASM281668v1_genomic.gff:NC_038307.1	three_prime_UTR	NC_038307.1	HNRNPL	ENSG00000104824
M027_0.6	7	+	0	1000	0.276	0.546006	725	1	1	GCF_002816725.1_ASM281672v1_genomic.gff:NC_038308.1	five_prime_UTR	NC_038308.1	HNRNPL	ENSG00000104824
M027_0.6	7	+	0	1000	0.067	0.269413	61	1	1	GCF_002816725.1_ASM281672v1_genomic.gff:NC_038308.1	three_prime_UTR	NC_038308.1	HNRNPL	ENSG00000104824
M027_0.6	7	+	0	1000	0.099	0.333632	438	1	1	GCF_002820785.1_ASM282078v1_genomic.gff:NC_038426.1	five_prime_UTR	NC_038426.1	HNRNPL	ENSG00000104824
M027_0.6	7	+	0	1000	0.025	0.174371	96	1	1	GCF_002820785.1_ASM282078v1_genomic.gff:NC_038426.1	three_prime_UTR	NC_038426.1	HNRNPL	ENSG00000104824
M027_0.6	7	+	0	1000	0.076	0.28338	322	1	1	GCF_002821385.1_ASM282138v1_genomic.gff:NC_038436.1	five_prime_UTR	NC_038436.1	HNRNPL	ENSG00000104824
M027_0.6	7	+	0	1000	0.03	0.182025	28	1	1	GCF_002821385.1_ASM282138v1_genomic.gff:NC_038436.1	three_prime_UTR	NC_038436.1	HNRNPL	ENSG00000104824
M027_0.6	7	+	0	1000	0.134	0.410137	258	1	1	GCF_009858895.2_ASM985889v3_genomic.gff:NC_045512.2	five_prime_UTR	NC_045512.2	HNRNPL	ENSG00000104824
M027_0.6	7	+	0	1000	0.074	0.290876	222	1	1	GCF_009858895.2_ASM985889v3_genomic.gff:NC_045512.2	three_prime_UTR	NC_045512.2	HNRNPL	ENSG00000104824
M032_0.6	7	+	0	1000	0.066	0.256339	17	1	1	GCF_000850885.1_ViralProj14831_genomic.gff:NC_003908.1	five_prime_UTR	NC_003908.1	IGF2BP2	ENSG00000073792
M032_0.6	7	+	1	1000	0.845	0.934799	294	0.570965	1	GCF_000850885.1_ViralProj14831_genomic.gff:NC_003908.1	three_prime_UTR	NC_003908.1	IGF2BP2	ENSG00000073792
M032_0.6	7	+	1	1000	0.54	0.748973	801	0.417358	1	GCF_000853805.1_ViralProj14948_genomic.gff:NC_004421.1	five_prime_UTR	NC_004421.1	IGF2BP2	ENSG00000073792
M032_0.6	7	+	0	1000	0.037	0.208985	167	1	1	GCF_000853805.1_ViralProj14948_genomic.gff:NC_004421.1	three_prime_UTR	NC_004421.1	IGF2BP2	ENSG00000073792
M032_0.6	7	+	0	1000	0.21	0.458378	279	1	1	GCF_000853865.1_ViralProj14960_genomic.gff:NC_005831.2	five_prime_UTR	NC_005831.2	IGF2BP2	ENSG00000073792
M032_0.6	7	+	1	1000	0.342	0.584275	280	0.2898	1	GCF_000853865.1_ViralProj14960_genomic.gff:NC_005831.2	three_prime_UTR	NC_005831.2	IGF2BP2	ENSG00000073792
M032_0.6	7	+	0	1000	0.048	0.223038	123	1	1	GCF_000860805.1_ViralProj15370_genomic.gff:NC_003690.1	five_prime_UTR	NC_003690.1	IGF2BP2	ENSG00000073792
M032_0.6	7	+	3	1000	0.569	0.793643	561	0.0200972	1	GCF_000860805.1_ViralProj15370_genomic.gff:NC_003690.1	three_prime_UTR	NC_003690.1	IGF2BP2	ENSG00000073792
M032_0.6	7	+	0	1000	0.073	0.285924	89	1	1	GCF_000861085.1_ViralProj15431_genomic.gff:NC_001563.2	five_prime_UTR	NC_001563.2	IGF2BP2	ENSG00000073792
M032_0.6	7	+	1	1000	0.474	0.67363	566	0.377616	1	GCF_000861085.1_ViralProj15431_genomic.gff:NC_001563.2	three_prime_UTR	NC_001563.2	IGF2BP2	ENSG00000073792
M032_0.6	7	+	1	1000	0.518	0.733631	735	0.404398	1	GCF_000861165.1_ViralProj15288_genomic.gff:NC_002058.3	five_prime_UTR	NC_002058.3	IGF2BP2	ENSG00000073792
M032_0.6	7	+	0	1000	0.502	0.728373	1060	1	1	GCF_000861185.1_ViralProj15292_genomic.gff:NC_001366.1	five_prime_UTR	NC_001366.1	IGF2BP2	ENSG00000073792
M032_0.6	7	+	1	1000	0.711	0.853351	695	0.509026	1	GCF_000861505.1_ViralProj15357_genomic.gff:NC_001897.1	five_prime_UTR	NC_001897.1	IGF2BP2	ENSG00000073792
M032_0.6	7	+	0	1000	0.055	0.236709	80	1	1	GCF_000861505.1_ViralProj15357_genomic.gff:NC_001897.1	three_prime_UTR	NC_001897.1	IGF2BP2	ENSG00000073792
M032_0.6	7	+	0	1000	0.033	0.194805	334	1	1	GCF_000861845.1_ViralProj15432_genomic.gff:NC_004102.1	five_prime_UTR	NC_004102.1	IGF2BP2	ENSG00000073792
M032_0.6	7	+	0	1000	0.014	0.117549	262	1	1	GCF_000861845.1_ViralProj15432_genomic.gff:NC_004102.1	three_prime_UTR	NC_004102.1	IGF2BP2	ENSG00000073792
M032_0.6	7	+	0	1000	0.431	0.644713	743	1	1	GCF_000861905.1_ViralProj15445_genomic.gff:NC_001612.1	five_prime_UTR	NC_001612.1	IGF2BP2	ENSG00000073792
M032_0.6	7	+	0	1000	0.065	0.250675	74	1	1	GCF_000861905.1_ViralProj15445_genomic.gff:NC_001612.1	three_prime_UTR	NC_001612.1	IGF2BP2	ENSG00000073792
M032_0.6	7	+	0	1000	0.071	0.26463	37	1	1	GCF_000862105.1_ViralProj15302_genomic.gff:NC_001449.1	five_prime_UTR	NC_001449.1	IGF2BP2	ENSG00000073792
M032_0.6	7	+	0	1000	0.023	0.149978	111	1	1	GCF_000862105.1_ViralProj15302_genomic.gff:NC_001449.1	three_prime_UTR	NC_001449.1	IGF2BP2	ENSG00000073792
M032_0.6	7	+	0	1000	0.027	0.162164	87	1	1	GCF_000862125.1_ViralProj15306_genomic.gff:NC_001477.1	five_prime_UTR	NC_001477.1	IGF2BP2	ENSG00000073792
M032_0.6	7	+	2	1000	0.946	0.960211	455	0.244365	1	GCF_000862125.1_ViralProj15306_genomic.gff:NC_001477.1	three_prime_UTR	NC_001477.1	IGF2BP2	ENSG00000073792
M032_0.6	7	+	0	1000	0.071	0.26463	122	1	1	GCF_000863165.1_ViralProj15343_genomic.gff:NC_001809.1	five_prime_UTR	NC_001809.1	IGF2BP2	ENSG00000073792
M032_0.6	7	+	1	1000	0.416	0.658314	490	0.340436	1	GCF_000863165.1_ViralProj15343_genomic.gff:NC_001809.1	three_prime_UTR	NC_001809.1	IGF2BP2	ENSG00000073792
M032_0.6	7	+	0	1000	0.031	0.179084	69	1	1	GCF_000863385.1_ViralProj15392_genomic.gff:NC_003417.1	five_prime_UTR	NC_003417.1	IGF2BP2	ENSG00000073792
M032_0.6	7	+	0	1000	0.017	0.129336	59	1	1	GCF_000864005.1_ViralProj15520_genomic.gff:NC_001959.2	three_prime_UTR	NC_001959.2	IGF2BP2	ENSG00000073792
M032_0.6	7	+	0	1000	0.111	0.332851	94	1	1	GCF_000865065.1_ViralProj15599_genomic.gff:NC_002640.1	five_prime_UTR	NC_002640.1	IGF2BP2	ENSG00000073792
M032_0.6	7	+	2	1000	0.503	0.713092	377	0.0910141	1	GCF_000865065.1_ViralProj15599_genomic.gff:NC_002640.1	three_prime_UTR	NC_002640.1	IGF2BP2	ENSG00000073792
M032_0.6	7	+	0	1000	0.01	0.0995485	87	1	1	GCF_000866625.1_ViralProj15598_genomic.gff:NC_001475.2	five_prime_UTR	NC_001475.2	IGF2BP2	ENSG00000073792
M032_0.6	7	+	1	1000	0.36	0.623529	433	0.302428	1	GCF_000866625.1_ViralProj15598_genomic.gff:NC_001475.2	three_prime_UTR	NC_001475.2	IGF2BP2	ENSG00000073792
M032_0.6	7	+	0	1000	0.036	0.186383	333	1	1	GCF_000871165.1_ViralProj20937_genomic.gff:NC_009823.1	five_prime_UTR	NC_009823.1	IGF2BP2	ENSG00000073792
M032_0.6	7	+	0	1000	0.025	0.156203	262	1	1	GCF_000871165.1_ViralProj20937_genomic.gff:NC_009823.1	three_prime_UTR	NC_009823.1	IGF2BP2	ENSG00000073792
M032_0.6	7	+	0	1000	0.674	0.803972	1033	1	1	GCF_000871545.1_ViralProj19577_genomic.gff:NC_009448.2	five_prime_UTR	NC_009448.2	IGF2BP2	ENSG00000073792
M032_0.6	7	+	0	1000	0.023	0.15651	39	1	1	GCF_000871545.1_ViralProj19577_genomic.gff:NC_009448.2	three_prime_UTR	NC_009448.2	IGF2BP2	ENSG00000073792
M032_0.6	7	+	0	1000	0.034	0.2022	89	1	1	GCF_000871845.1_ViralProj20183_genomic.gff:NC_001474.2	five_prime_UTR	NC_001474.2	IGF2BP2	ENSG00000073792
M032_0.6	7	+	1	1000	0.652	0.820713	444	0.479247	1	GCF_000871845.1_ViralProj20183_genomic.gff:NC_001474.2	three_prime_UTR	NC_001474.2	IGF2BP2	ENSG00000073792
M032_0.6	7	+	0	1000	0.066	0.256339	335	1	1	GCF_000872025.1_ViralProj20939_genomic.gff:NC_009827.1	five_prime_UTR	NC_009827.1	IGF2BP2	ENSG00000073792
M032_0.6	7	+	0	1000	0.023	0.15651	222	1	1	GCF_000872025.1_ViralProj20939_genomic.gff:NC_009827.1	three_prime_UTR	NC_009827.1	IGF2BP2	ENSG00000073792
M032_0.6	7	+	0	1000	0.018	0.133018	272	1	1	GCF_000873605.1_ViralProj20935_genomic.gff:NC_009826.1	five_prime_UTR	NC_009826.1	IGF2BP2	ENSG00000073792
M032_0.6	7	+	0	1000	0.022	0.146757	272	1	1	GCF_000874265.1_ViralProj20933_genomic.gff:NC_009825.1	five_prime_UTR	NC_009825.1	IGF2BP2	ENSG00000073792
M032_0.6	7	+	0	1000	0.045	0.212179	332	1	1	GCF_000874285.1_ViralProj20941_genomic.gff:NC_009824.1	five_prime_UTR	NC_009824.1	IGF2BP2	ENSG00000073792
M032_0.6	7	+	0	998	0.0170341	0.129463	13	1	1	GCF_000874285.1_ViralProj20941_genomic.gff:NC_009824.1	three_prime_UTR	NC_009824.1	IGF2BP2	ENSG00000073792
M032_0.6	7	+	0	1000	0.016	0.125538	51	1	1	GCF_000880715.1_ViralProj32327_genomic.gff:NC_011400.1	three_prime_UTR	NC_011400.1	IGF2BP2	ENSG00000073792
M032_0.6	7	+	0	1000	0.063	0.251185	99	1	1	GCF_000882815.3_ViralProj36615_genomic.gff:NC_012532.1	five_prime_UTR	NC_012532.1	IGF2BP2	ENSG00000073792
M032_0.6	7	+	0	1000	0.347	0.590711	421	1	1	GCF_000882815.3_ViralProj36615_genomic.gff:NC_012532.1	three_prime_UTR	NC_012532.1	IGF2BP2	ENSG00000073792
M032_0.6	7	+	0	1000	0.54	0.751642	742	1	1	GCF_000884955.1_ViralProj38499_genomic.gff:NC_012801.1	five_prime_UTR	NC_012801.1	IGF2BP2	ENSG00000073792
M032_0.6	7	+	0	1000	0.052	0.230975	74	1	1	GCF_000884955.1_ViralProj38499_genomic.gff:NC_012801.1	three_prime_UTR	NC_012801.1	IGF2BP2	ENSG00000073792
M032_0.6	7	+	0	1000	0.889	0.970371	1157	1	1	GCF_000885595.1_ViralProj38497_genomic.gff:NC_012800.1	five_prime_UTR	NC_012800.1	IGF2BP2	ENSG00000073792
M032_0.6	7	+	0	1000	0.014	0.117549	86	1	1	GCF_000885595.1_ViralProj38497_genomic.gff:NC_012800.1	three_prime_UTR	NC_012800.1	IGF2BP2	ENSG00000073792
M032_0.6	7	+	0	1000	0.012	0.10894	31	1	1	GCF_000885815.1_ViralProj39811_genomic.gff:NC_013060.1	five_prime_UTR	NC_013060.1	IGF2BP2	ENSG00000073792
M032_0.6	7	+	0	1000	0.067	0.250147	91	1	1	GCF_000885815.1_ViralProj39811_genomic.gff:NC_013060.1	three_prime_UTR	NC_013060.1	IGF2BP2	ENSG00000073792
M032_0.6	7	+	0	1000	0.262	0.489485	131	1	1	GCF_000886455.1_ViralProj38493_genomic.gff:NC_012798.1	five_prime_UTR	NC_012798.1	IGF2BP2	ENSG00000073792
M032_0.6	7	+	0	1000	0.07	0.259166	75	1	1	GCF_000886455.1_ViralProj38493_genomic.gff:NC_012798.1	three_prime_UTR	NC_012798.1	IGF2BP2	ENSG00000073792
M032_0.6	7	+	1	1000	0.469	0.708195	740	0.374465	1	GCF_000886475.1_ViralProj38501_genomic.gff:NC_012802.1	five_prime_UTR	NC_012802.1	IGF2BP2	ENSG00000073792
M032_0.6	7	+	0	1000	0.056	0.238581	80	1	1	GCF_000886475.1_ViralProj38501_genomic.gff:NC_012802.1	three_prime_UTR	NC_012802.1	IGF2BP2	ENSG00000073792
M032_0.6	7	+	0	1000	0.023	0.149978	108	1	1	GCF_000897955.1_ViralProj178562_genomic.gff:NC_019027.1	three_prime_UTR	NC_019027.1	IGF2BP2	ENSG00000073792
M032_0.6	7	+	0	1000	0.205	0.439509	271	1	1	GCF_000901155.1_ViralProj183710_genomic.gff:NC_019843.3	five_prime_UTR	NC_019843.3	IGF2BP2	ENSG00000073792
M032_0.6	7	+	0	1000	2.081	1.39369	1012	0.282141	1	GCF_000901155.1_ViralProj183710_genomic.gff:NC_019843.3	three_prime_UTR	NC_019843.3	IGF2BP2	ENSG00000073792
M032_0.6	7	+	0	1000	0.001	0.0316228	29	1	1	GCF_000901475.1_ViralProj178564_genomic.gff:NC_019026.1	five_prime_UTR	NC_019026.1	IGF2BP2	ENSG00000073792
M032_0.6	7	+	0	1000	0.193	0.419436	88	1	1	GCF_000901475.1_ViralProj178564_genomic.gff:NC_019026.1	three_prime_UTR	NC_019026.1	IGF2BP2	ENSG00000073792
M032_0.6	7	+	0	1000	0.013	0.113331	35	1	1	GCF_000917835.1_ViralProj242273_genomic.gff:NC_023812.1	five_prime_UTR	NC_023812.1	IGF2BP2	ENSG00000073792
M032_0.6	7	+	1	1000	0.387	0.62259	326	0.321065	1	GCF_000917835.1_ViralProj242273_genomic.gff:NC_023812.1	three_prime_UTR	NC_023812.1	IGF2BP2	ENSG00000073792
M032_0.6	7	+	0	1000	0.225	0.46754	513	1	1	GCF_000921975.1_ViralProj253339_genomic.gff:NC_024377.1	five_prime_UTR	NC_024377.1	IGF2BP2	ENSG00000073792
M032_0.6	7	+	0	1000	0.094	0.308641	301	1	1	GCF_000921975.1_ViralProj253339_genomic.gff:NC_024377.1	three_prime_UTR	NC_024377.1	IGF2BP2	ENSG00000073792
M032_0.6	7	+	0	1000	0.114	0.353736	320	1	1	GCF_001310135.2_ViralProj298087_genomic.gff:NC_027998.2	five_prime_UTR	NC_027998.2	IGF2BP2	ENSG00000073792
M032_0.6	7	+	0	1000	0.19	0.467031	359	1	1	GCF_001310135.2_ViralProj298087_genomic.gff:NC_027998.2	three_prime_UTR	NC_027998.2	IGF2BP2	ENSG00000073792
M032_0.6	7	+	0	1000	0.034	0.186759	332	1	1	GCF_001712785.1_ViralProj339556_genomic.gff:NC_030791.1	five_prime_UTR	NC_030791.1	IGF2BP2	ENSG00000073792
M032_0.6	7	+	0	1000	0.037	0.188856	55	1	1	GCF_001712785.1_ViralProj339556_genomic.gff:NC_030791.1	three_prime_UTR	NC_030791.1	IGF2BP2	ENSG00000073792
M032_0.6	7	+	0	1000	0.081	0.294152	175	1	1	GCF_002117635.1_ViralProj384965_genomic.gff:NC_034385.1	five_prime_UTR	NC_034385.1	IGF2BP2	ENSG00000073792
M032_0.6	7	+	0	1000	0.167	0.386342	80	1	1	GCF_002117635.1_ViralProj384965_genomic.gff:NC_034385.1	three_prime_UTR	NC_034385.1	IGF2BP2	ENSG00000073792
M032_0.6	7	+	1	1000	0.64	0.82163	735	0.472855	1	GCF_002816685.1_ASM281668v1_genomic.gff:NC_038307.1	five_prime_UTR	NC_038307.1	IGF2BP2	ENSG00000073792
M032_0.6	7	+	0	1000	0.057	0.236235	92	1	1	GCF_002816685.1_ASM281668v1_genomic.gff:NC_038307.1	three_prime_UTR	NC_038307.1	IGF2BP2	ENSG00000073792
M032_0.6	7	+	0	1000	0.605	0.797252	725	1	1	GCF_002816725.1_ASM281672v1_genomic.gff:NC_038308.1	five_prime_UTR	NC_038308.1	IGF2BP2	ENSG00000073792
M032_0.6	7	+	0	1000	0.105	0.32876	61	1	1	GCF_002816725.1_ASM281672v1_genomic.gff:NC_038308.1	three_prime_UTR	NC_038308.1	IGF2BP2	ENSG00000073792
M032_0.6	7	+	1	1000	0.099	0.333632	438	0.0942674	1	GCF_002820785.1_ASM282078v1_genomic.gff:NC_038426.1	five_prime_UTR	NC_038426.1	IGF2BP2	ENSG00000073792
M032_0.6	7	+	0	1000	0.089	0.301944	96	1	1	GCF_002820785.1_ASM282078v1_genomic.gff:NC_038426.1	three_prime_UTR	NC_038426.1	IGF2BP2	ENSG00000073792
M032_0.6	7	+	0	1000	0.126	0.369134	322	1	1	GCF_002821385.1_ASM282138v1_genomic.gff:NC_038436.1	five_prime_UTR	NC_038436.1	IGF2BP2	ENSG00000073792
M032_0.6	7	+	0	1000	0.076	0.28338	28	1	1	GCF_002821385.1_ASM282138v1_genomic.gff:NC_038436.1	three_prime_UTR	NC_038436.1	IGF2BP2	ENSG00000073792
M032_0.6	7	+	0	1000	0.314	0.567209	258	1	1	GCF_009858895.2_ASM985889v3_genomic.gff:NC_045512.2	five_prime_UTR	NC_045512.2	IGF2BP2	ENSG00000073792
M032_0.6	7	+	0	1000	0.43	0.656911	222	1	1	GCF_009858895.2_ASM985889v3_genomic.gff:NC_045512.2	three_prime_UTR	NC_045512.2	IGF2BP2	ENSG00000073792
M033_0.6	7	+	0	1000	0.09	0.286325	17	1	1	GCF_000850885.1_ViralProj14831_genomic.gff:NC_003908.1	five_prime_UTR	NC_003908.1	KHDRBS3	ENSG00000131773
M033_0.6	7	+	0	1000	0.231	0.473141	294	1	1	GCF_000850885.1_ViralProj14831_genomic.gff:NC_003908.1	three_prime_UTR	NC_003908.1	KHDRBS3	ENSG00000131773
M033_0.6	7	+	0	1000	0.108	0.335333	801	1	1	GCF_000853805.1_ViralProj14948_genomic.gff:NC_004421.1	five_prime_UTR	NC_004421.1	KHDRBS3	ENSG00000131773
M033_0.6	7	+	0	1000	0.012	0.10894	167	1	1	GCF_000853805.1_ViralProj14948_genomic.gff:NC_004421.1	three_prime_UTR	NC_004421.1	KHDRBS3	ENSG00000131773
M033_0.6	7	+	0	1000	0.136	0.365565	279	1	1	GCF_000853865.1_ViralProj14960_genomic.gff:NC_005831.2	five_prime_UTR	NC_005831.2	KHDRBS3	ENSG00000131773
M033_0.6	7	+	0	1000	0.164	0.408988	280	1	1	GCF_000853865.1_ViralProj14960_genomic.gff:NC_005831.2	three_prime_UTR	NC_005831.2	KHDRBS3	ENSG00000131773
M033_0.6	7	+	0	1000	0.008	0.0891288	123	1	1	GCF_000860805.1_ViralProj15370_genomic.gff:NC_003690.1	five_prime_UTR	NC_003690.1	KHDRBS3	ENSG00000131773
M033_0.6	7	+	0	1000	0.106	0.314425	561	1	1	GCF_000860805.1_ViralProj15370_genomic.gff:NC_003690.1	three_prime_UTR	NC_003690.1	KHDRBS3	ENSG00000131773
M033_0.6	7	+	0	1000	0.02	0.14007	89	1	1	GCF_000861085.1_ViralProj15431_genomic.gff:NC_001563.2	five_prime_UTR	NC_001563.2	KHDRBS3	ENSG00000131773
M033_0.6	7	+	0	1000	0.166	0.395728	566	1	1	GCF_000861085.1_ViralProj15431_genomic.gff:NC_001563.2	three_prime_UTR	NC_001563.2	KHDRBS3	ENSG00000131773
M033_0.6	7	+	0	1000	0.238	0.47072	735	1	1	GCF_000861165.1_ViralProj15288_genomic.gff:NC_002058.3	five_prime_UTR	NC_002058.3	KHDRBS3	ENSG00000131773
M033_0.6	7	+	0	1000	0.21	0.449558	1060	1	1	GCF_000861185.1_ViralProj15292_genomic.gff:NC_001366.1	five_prime_UTR	NC_001366.1	KHDRBS3	ENSG00000131773
M033_0.6	7	+	0	1000	0.377	0.607651	695	1	1	GCF_000861505.1_ViralProj15357_genomic.gff:NC_001897.1	five_prime_UTR	NC_001897.1	KHDRBS3	ENSG00000131773
M033_0.6	7	+	0	1000	0.054	0.226131	80	1	1	GCF_000861505.1_ViralProj15357_genomic.gff:NC_001897.1	three_prime_UTR	NC_001897.1	KHDRBS3	ENSG00000131773
M033_0.6	7	+	1	1000	0.031	0.173404	334	0.0305258	1	GCF_000861845.1_ViralProj15432_genomic.gff:NC_004102.1	five_prime_UTR	NC_004102.1	KHDRBS3	ENSG00000131773
M033_0.6	7	+	0	1000	0.002	0.044699	262	1	1	GCF_000861845.1_ViralProj15432_genomic.gff:NC_004102.1	three_prime_UTR	NC_004102.1	KHDRBS3	ENSG00000131773
M033_0.6	7	+	0	1000	0.175	0.42018	743	1	1	GCF_000861905.1_ViralProj15445_genomic.gff:NC_001612.1	five_prime_UTR	NC_001612.1	KHDRBS3	ENSG00000131773
M033_0.6	7	+	0	1000	0.064	0.244875	74	1	1	GCF_000861905.1_ViralProj15445_genomic.gff:NC_001612.1	three_prime_UTR	NC_001612.1	KHDRBS3	ENSG00000131773
M033_0.6	7	+	0	1000	0.03	0.170673	37	1	1	GCF_000862105.1_ViralProj15302_genomic.gff:NC_001449.1	five_prime_UTR	NC_001449.1	KHDRBS3	ENSG00000131773
M033_0.6	7	+	0	1000	0.037	0.199175	111	1	1	GCF_000862105.1_ViralProj15302_genomic.gff:NC_001449.1	three_prime_UTR	NC_001449.1	KHDRBS3	ENSG00000131773
M033_0.6	7	+	0	1000	0.014	0.117549	87	1	1	GCF_000862125.1_ViralProj15306_genomic.gff:NC_001477.1	five_prime_UTR	NC_001477.1	KHDRBS3	ENSG00000131773
M033_0.6	7	+	0	1000	0.218	0.454624	455	1	1	GCF_000862125.1_ViralProj15306_genomic.gff:NC_001477.1	three_prime_UTR	NC_001477.1	KHDRBS3	ENSG00000131773
M033_0.6	7	+	0	1000	0.003	0.0547174	122	1	1	GCF_000863165.1_ViralProj15343_genomic.gff:NC_001809.1	five_prime_UTR	NC_001809.1	KHDRBS3	ENSG00000131773
M033_0.6	7	+	0	1000	0.057	0.236235	490	1	1	GCF_000863165.1_ViralProj15343_genomic.gff:NC_001809.1	three_prime_UTR	NC_001809.1	KHDRBS3	ENSG00000131773
M033_0.6	7	+	0	1000	0.004	0.0631505	69	1	1	GCF_000863385.1_ViralProj15392_genomic.gff:NC_003417.1	five_prime_UTR	NC_003417.1	KHDRBS3	ENSG00000131773
M033_0.6	7	+	0	1000	0.015	0.121613	59	1	1	GCF_000864005.1_ViralProj15520_genomic.gff:NC_001959.2	three_prime_UTR	NC_001959.2	KHDRBS3	ENSG00000131773
M033_0.6	7	+	0	1000	0.019	0.136593	94	1	1	GCF_000865065.1_ViralProj15599_genomic.gff:NC_002640.1	five_prime_UTR	NC_002640.1	KHDRBS3	ENSG00000131773
M033_0.6	7	+	1	1000	0.174	0.417011	377	0.159737	1	GCF_000865065.1_ViralProj15599_genomic.gff:NC_002640.1	three_prime_UTR	NC_002640.1	KHDRBS3	ENSG00000131773
M033_0.6	7	+	0	1000	0.007	0.0834144	87	1	1	GCF_000866625.1_ViralProj15598_genomic.gff:NC_001475.2	five_prime_UTR	NC_001475.2	KHDRBS3	ENSG00000131773
M033_0.6	7	+	0	1000	0.102	0.31256	433	1	1	GCF_000866625.1_ViralProj15598_genomic.gff:NC_001475.2	three_prime_UTR	NC_001475.2	KHDRBS3	ENSG00000131773
M033_0.6	7	+	1	1000	0.045	0.207408	333	0.0440054	1	GCF_000871165.1_ViralProj20937_genomic.gff:NC_009823.1	five_prime_UTR	NC_009823.1	KHDRBS3	ENSG00000131773
M033_0.6	7	+	0	1000	0.004	0.0631505	262	1	1	GCF_000871165.1_ViralProj20937_genomic.gff:NC_009823.1	three_prime_UTR	NC_009823.1	KHDRBS3	ENSG00000131773
M033_0.6	7	+	0	1000	0.278	0.531977	1033	1	1	GCF_000871545.1_ViralProj19577_genomic.gff:NC_009448.2	five_prime_UTR	NC_009448.2	KHDRBS3	ENSG00000131773
M033_0.6	7	+	0	1000	0.008	0.0891288	39	1	1	GCF_000871545.1_ViralProj19577_genomic.gff:NC_009448.2	three_prime_UTR	NC_009448.2	KHDRBS3	ENSG00000131773
M033_0.6	7	+	0	1000	0.021	0.150272	89	1	1	GCF_000871845.1_ViralProj20183_genomic.gff:NC_001474.2	five_prime_UTR	NC_001474.2	KHDRBS3	ENSG00000131773
M033_0.6	7	+	0	1000	0.326	0.574503	444	1	1	GCF_000871845.1_ViralProj20183_genomic.gff:NC_001474.2	three_prime_UTR	NC_001474.2	KHDRBS3	ENSG00000131773
M033_0.6	7	+	0	1000	0.03	0.17644	335	1	1	GCF_000872025.1_ViralProj20939_genomic.gff:NC_009827.1	five_prime_UTR	NC_009827.1	KHDRBS3	ENSG00000131773
M033_0.6	7	+	0	1000	0.003	0.0547174	222	1	1	GCF_000872025.1_ViralProj20939_genomic.gff:NC_009827.1	three_prime_UTR	NC_009827.1	KHDRBS3	ENSG00000131773
M033_0.6	7	+	1	1000	0.032	0.176088	272	0.0314952	1	GCF_000873605.1_ViralProj20935_genomic.gff:NC_009826.1	five_prime_UTR	NC_009826.1	KHDRBS3	ENSG00000131773
M033_0.6	7	+	0	1000	0.032	0.176088	272	1	1	GCF_000874265.1_ViralProj20933_genomic.gff:NC_009825.1	five_prime_UTR	NC_009825.1	KHDRBS3	ENSG00000131773
M033_0.6	7	+	0	1000	0.03	0.170673	332	1	1	GCF_000874285.1_ViralProj20941_genomic.gff:NC_009824.1	five_prime_UTR	NC_009824.1	KHDRBS3	ENSG00000131773
M033_0.6	7	+	0	998	0.0150301	0.121733	13	1	1	GCF_000874285.1_ViralProj20941_genomic.gff:NC_009824.1	three_prime_UTR	NC_009824.1	KHDRBS3	ENSG00000131773
M033_0.6	7	+	0	1000	0.013	0.113331	99	1	1	GCF_000882815.3_ViralProj36615_genomic.gff:NC_012532.1	five_prime_UTR	NC_012532.1	KHDRBS3	ENSG00000131773
M033_0.6	7	+	0	1000	0.068	0.255815	421	1	1	GCF_000882815.3_ViralProj36615_genomic.gff:NC_012532.1	three_prime_UTR	NC_012532.1	KHDRBS3	ENSG00000131773
M033_0.6	7	+	0	1000	0.131	0.366023	742	1	1	GCF_000884955.1_ViralProj38499_genomic.gff:NC_012801.1	five_prime_UTR	NC_012801.1	KHDRBS3	ENSG00000131773
M033_0.6	7	+	0	1000	0.03	0.17644	74	1	1	GCF_000884955.1_ViralProj38499_genomic.gff:NC_012801.1	three_prime_UTR	NC_012801.1	KHDRBS3	ENSG00000131773
M033_0.6	7	+	0	1000	0.193	0.442659	1157	1	1	GCF_000885595.1_ViralProj38497_genomic.gff:NC_012800.1	five_prime_UTR	NC_012800.1	KHDRBS3	ENSG00000131773
M033_0.6	7	+	0	1000	0.02	0.14007	86	1	1	GCF_000885595.1_ViralProj38497_genomic.gff:NC_012800.1	three_prime_UTR	NC_012800.1	KHDRBS3	ENSG00000131773
M033_0.6	7	+	0	1000	0.077	0.266725	91	1	1	GCF_000885815.1_ViralProj39811_genomic.gff:NC_013060.1	three_prime_UTR	NC_013060.1	KHDRBS3	ENSG00000131773
M033_0.6	7	+	0	1000	0.058	0.238102	131	1	1	GCF_000886455.1_ViralProj38493_genomic.gff:NC_012798.1	five_prime_UTR	NC_012798.1	KHDRBS3	ENSG00000131773
M033_0.6	7	+	0	1000	0.027	0.162164	75	1	1	GCF_000886455.1_ViralProj38493_genomic.gff:NC_012798.1	three_prime_UTR	NC_012798.1	KHDRBS3	ENSG00000131773
M033_0.6	7	+	0	1000	0.102	0.318901	740	1	1	GCF_000886475.1_ViralProj38501_genomic.gff:NC_012802.1	five_prime_UTR	NC_012802.1	KHDRBS3	ENSG00000131773
M033_0.6	7	+	0	1000	0.006	0.0772656	80	1	1	GCF_000886475.1_ViralProj38501_genomic.gff:NC_012802.1	three_prime_UTR	NC_012802.1	KHDRBS3	ENSG00000131773
M033_0.6	7	+	0	1000	0.001	0.0316228	33	1	1	GCF_000897955.1_ViralProj178562_genomic.gff:NC_019027.1	five_prime_UTR	NC_019027.1	KHDRBS3	ENSG00000131773
M033_0.6	7	+	0	1000	0.022	0.146757	108	1	1	GCF_000897955.1_ViralProj178562_genomic.gff:NC_019027.1	three_prime_UTR	NC_019027.1	KHDRBS3	ENSG00000131773
M033_0.6	7	+	0	1000	0.005	0.070569	31	1	1	GCF_000899535.1_ViralProj178563_genomic.gff:NC_019028.1	three_prime_UTR	NC_019028.1	KHDRBS3	ENSG00000131773
M033_0.6	7	+	0	1000	0.075	0.274682	271	1	1	GCF_000901155.1_ViralProj183710_genomic.gff:NC_019843.3	five_prime_UTR	NC_019843.3	KHDRBS3	ENSG00000131773
M033_0.6	7	+	1	1000	0.596	0.790828	1012	0.449085	1	GCF_000901155.1_ViralProj183710_genomic.gff:NC_019843.3	three_prime_UTR	NC_019843.3	KHDRBS3	ENSG00000131773
M033_0.6	7	+	0	1000	0.086	0.294433	88	1	1	GCF_000901475.1_ViralProj178564_genomic.gff:NC_019026.1	three_prime_UTR	NC_019026.1	KHDRBS3	ENSG00000131773
M033_0.6	7	+	0	1000	0.038	0.191292	35	1	1	GCF_000917835.1_ViralProj242273_genomic.gff:NC_023812.1	five_prime_UTR	NC_023812.1	KHDRBS3	ENSG00000131773
M033_0.6	7	+	1	1000	0.261	0.493074	326	0.2298	1	GCF_000917835.1_ViralProj242273_genomic.gff:NC_023812.1	three_prime_UTR	NC_023812.1	KHDRBS3	ENSG00000131773
M033_0.6	7	+	0	1000	0.148	0.40032	513	1	1	GCF_000921975.1_ViralProj253339_genomic.gff:NC_024377.1	five_prime_UTR	NC_024377.1	KHDRBS3	ENSG00000131773
M033_0.6	7	+	0	1000	0.078	0.268306	301	1	1	GCF_000921975.1_ViralProj253339_genomic.gff:NC_024377.1	three_prime_UTR	NC_024377.1	KHDRBS3	ENSG00000131773
M033_0.6	7	+	0	1000	0.027	0.168224	320	1	1	GCF_001310135.2_ViralProj298087_genomic.gff:NC_027998.2	five_prime_UTR	NC_027998.2	KHDRBS3	ENSG00000131773
M033_0.6	7	+	0	1000	0.092	0.296013	359	1	1	GCF_001310135.2_ViralProj298087_genomic.gff:NC_027998.2	three_prime_UTR	NC_027998.2	KHDRBS3	ENSG00000131773
M033_0.6	7	+	0	1000	0.042	0.205617	332	1	1	GCF_001712785.1_ViralProj339556_genomic.gff:NC_030791.1	five_prime_UTR	NC_030791.1	KHDRBS3	ENSG00000131773
M033_0.6	7	+	0	1000	0.004	0.0631505	55	1	1	GCF_001712785.1_ViralProj339556_genomic.gff:NC_030791.1	three_prime_UTR	NC_030791.1	KHDRBS3	ENSG00000131773
M033_0.6	7	+	0	1000	0.029	0.16789	175	1	1	GCF_002117635.1_ViralProj384965_genomic.gff:NC_034385.1	five_prime_UTR	NC_034385.1	KHDRBS3	ENSG00000131773
M033_0.6	7	+	0	1000	0.018	0.133018	80	1	1	GCF_002117635.1_ViralProj384965_genomic.gff:NC_034385.1	three_prime_UTR	NC_034385.1	KHDRBS3	ENSG00000131773
M033_0.6	7	+	0	1000	0.244	0.471897	735	1	1	GCF_002816685.1_ASM281668v1_genomic.gff:NC_038307.1	five_prime_UTR	NC_038307.1	KHDRBS3	ENSG00000131773
M033_0.6	7	+	0	1000	0.111	0.326781	92	1	1	GCF_002816685.1_ASM281668v1_genomic.gff:NC_038307.1	three_prime_UTR	NC_038307.1	KHDRBS3	ENSG00000131773
M033_0.6	7	+	0	1000	0.324	0.585976	725	1	1	GCF_002816725.1_ASM281672v1_genomic.gff:NC_038308.1	five_prime_UTR	NC_038308.1	KHDRBS3	ENSG00000131773
M033_0.6	7	+	0	1000	0.027	0.162164	61	1	1	GCF_002816725.1_ASM281672v1_genomic.gff:NC_038308.1	three_prime_UTR	NC_038308.1	KHDRBS3	ENSG00000131773
M033_0.6	7	+	0	1000	0.027	0.162164	438	1	1	GCF_002820785.1_ASM282078v1_genomic.gff:NC_038426.1	five_prime_UTR	NC_038426.1	KHDRBS3	ENSG00000131773
M033_0.6	7	+	0	1000	0.013	0.113331	96	1	1	GCF_002820785.1_ASM282078v1_genomic.gff:NC_038426.1	three_prime_UTR	NC_038426.1	KHDRBS3	ENSG00000131773
M033_0.6	7	+	0	1000	0.036	0.186383	322	1	1	GCF_002821385.1_ASM282138v1_genomic.gff:NC_038436.1	five_prime_UTR	NC_038436.1	KHDRBS3	ENSG00000131773
M033_0.6	7	+	0	1000	0.045	0.207408	28	1	1	GCF_002821385.1_ASM282138v1_genomic.gff:NC_038436.1	three_prime_UTR	NC_038436.1	KHDRBS3	ENSG00000131773
M033_0.6	7	+	0	1000	0.132	0.358754	258	1	1	GCF_009858895.2_ASM985889v3_genomic.gff:NC_045512.2	five_prime_UTR	NC_045512.2	KHDRBS3	ENSG00000131773
M033_0.6	7	+	0	1000	0.312	0.51858	222	1	1	GCF_009858895.2_ASM985889v3_genomic.gff:NC_045512.2	three_prime_UTR	NC_045512.2	KHDRBS3	ENSG00000131773
M046_0.6	7	+	0	1000	0.012	0.10894	17	1	1	GCF_000850885.1_ViralProj14831_genomic.gff:NC_003908.1	five_prime_UTR	NC_003908.1	QKI	ENSG00000112531
M046_0.6	7	+	0	1000	0.267	0.509873	294	1	1	GCF_000850885.1_ViralProj14831_genomic.gff:NC_003908.1	three_prime_UTR	NC_003908.1	QKI	ENSG00000112531
M046_0.6	7	+	0	1000	0.166	0.39319	801	1	1	GCF_000853805.1_ViralProj14948_genomic.gff:NC_004421.1	five_prime_UTR	NC_004421.1	QKI	ENSG00000112531
M046_0.6	7	+	0	1000	0.032	0.181684	167	1	1	GCF_000853805.1_ViralProj14948_genomic.gff:NC_004421.1	three_prime_UTR	NC_004421.1	QKI	ENSG00000112531
M046_0.6	7	+	0	1000	0.068	0.259699	279	1	1	GCF_000853865.1_ViralProj14960_genomic.gff:NC_005831.2	five_prime_UTR	NC_005831.2	QKI	ENSG00000112531
M046_0.6	7	+	0	1000	0.037	0.194084	280	1	1	GCF_000853865.1_ViralProj14960_genomic.gff:NC_005831.2	three_prime_UTR	NC_005831.2	QKI	ENSG00000112531
M046_0.6	7	+	0	1000	0.002	0.044699	123	1	1	GCF_000860805.1_ViralProj15370_genomic.gff:NC_003690.1	five_prime_UTR	NC_003690.1	QKI	ENSG00000112531
M046_0.6	7	+	0	1000	0.077	0.281336	561	1	1	GCF_000860805.1_ViralProj15370_genomic.gff:NC_003690.1	three_prime_UTR	NC_003690.1	QKI	ENSG00000112531
M046_0.6	7	+	0	1000	0.026	0.159215	89	1	1	GCF_000861085.1_ViralProj15431_genomic.gff:NC_001563.2	five_prime_UTR	NC_001563.2	QKI	ENSG00000112531
M046_0.6	7	+	0	1000	0.169	0.415466	566	1	1	GCF_000861085.1_ViralProj15431_genomic.gff:NC_001563.2	three_prime_UTR	NC_001563.2	QKI	ENSG00000112531
M046_0.6	7	+	0	1000	0.189	0.43528	735	1	1	GCF_000861165.1_ViralProj15288_genomic.gff:NC_002058.3	five_prime_UTR	NC_002058.3	QKI	ENSG00000112531
M046_0.6	7	+	0	1000	0.173	0.413814	1060	1	1	GCF_000861185.1_ViralProj15292_genomic.gff:NC_001366.1	five_prime_UTR	NC_001366.1	QKI	ENSG00000112531
M046_0.6	7	+	0	1000	0.266	0.517215	695	1	1	GCF_000861505.1_ViralProj15357_genomic.gff:NC_001897.1	five_prime_UTR	NC_001897.1	QKI	ENSG00000112531
M046_0.6	7	+	0	1000	0.043	0.202959	80	1	1	GCF_000861505.1_ViralProj15357_genomic.gff:NC_001897.1	three_prime_UTR	NC_001897.1	QKI	ENSG00000112531
M046_0.6	7	+	0	1000	0.034	0.18132	334	1	1	GCF_000861845.1_ViralProj15432_genomic.gff:NC_004102.1	five_prime_UTR	NC_004102.1	QKI	ENSG00000112531
M046_0.6	7	+	0	1000	0.005	0.070569	262	1	1	GCF_000861845.1_ViralProj15432_genomic.gff:NC_004102.1	three_prime_UTR	NC_004102.1	QKI	ENSG00000112531
M046_0.6	7	+	0	1000	0.197	0.427052	743	1	1	GCF_000861905.1_ViralProj15445_genomic.gff:NC_001612.1	five_prime_UTR	NC_001612.1	QKI	ENSG00000112531
M046_0.6	7	+	0	1000	0.015	0.121613	74	1	1	GCF_000861905.1_ViralProj15445_genomic.gff:NC_001612.1	three_prime_UTR	NC_001612.1	QKI	ENSG00000112531
M046_0.6	7	+	0	1000	0.013	0.113331	37	1	1	GCF_000862105.1_ViralProj15302_genomic.gff:NC_001449.1	five_prime_UTR	NC_001449.1	QKI	ENSG00000112531
M046_0.6	7	+	0	1000	0.001	0.0316228	111	1	1	GCF_000862105.1_ViralProj15302_genomic.gff:NC_001449.1	three_prime_UTR	NC_001449.1	QKI	ENSG00000112531
M046_0.6	7	+	0	1000	0.041	0.203372	87	1	1	GCF_000862125.1_ViralProj15306_genomic.gff:NC_001477.1	five_prime_UTR	NC_001477.1	QKI	ENSG00000112531
M046_0.6	7	+	0	1000	0.114	0.321103	455	1	1	GCF_000862125.1_ViralProj15306_genomic.gff:NC_001477.1	three_prime_UTR	NC_001477.1	QKI	ENSG00000112531
M046_0.6	7	+	0	1000	0.004	0.0631505	122	1	1	GCF_000863165.1_ViralProj15343_genomic.gff:NC_001809.1	five_prime_UTR	NC_001809.1	QKI	ENSG00000112531
M046_0.6	7	+	0	1000	0.025	0.156203	490	1	1	GCF_000863165.1_ViralProj15343_genomic.gff:NC_001809.1	three_prime_UTR	NC_001809.1	QKI	ENSG00000112531
M046_0.6	7	+	0	1000	0.012	0.10894	69	1	1	GCF_000863385.1_ViralProj15392_genomic.gff:NC_003417.1	five_prime_UTR	NC_003417.1	QKI	ENSG00000112531
M046_0.6	7	+	0	1000	0.02	0.14007	94	1	1	GCF_000865065.1_ViralProj15599_genomic.gff:NC_002640.1	five_prime_UTR	NC_002640.1	QKI	ENSG00000112531
M046_0.6	7	+	0	1000	0.08	0.271429	377	1	1	GCF_000865065.1_ViralProj15599_genomic.gff:NC_002640.1	three_prime_UTR	NC_002640.1	QKI	ENSG00000112531
M046_0.6	7	+	0	1000	0.028	0.165055	87	1	1	GCF_000866625.1_ViralProj15598_genomic.gff:NC_001475.2	five_prime_UTR	NC_001475.2	QKI	ENSG00000112531
M046_0.6	7	+	0	1000	0.089	0.291829	433	1	1	GCF_000866625.1_ViralProj15598_genomic.gff:NC_001475.2	three_prime_UTR	NC_001475.2	QKI	ENSG00000112531
M046_0.6	7	+	0	1000	0.036	0.196832	333	1	1	GCF_000871165.1_ViralProj20937_genomic.gff:NC_009823.1	five_prime_UTR	NC_009823.1	QKI	ENSG00000112531
M046_0.6	7	+	0	1000	0.009	0.0944877	262	1	1	GCF_000871165.1_ViralProj20937_genomic.gff:NC_009823.1	three_prime_UTR	NC_009823.1	QKI	ENSG00000112531
M046_0.6	7	+	0	1000	0.136	0.373689	1033	1	1	GCF_000871545.1_ViralProj19577_genomic.gff:NC_009448.2	five_prime_UTR	NC_009448.2	QKI	ENSG00000112531
M046_0.6	7	+	0	1000	0.03	0.17644	89	1	1	GCF_000871845.1_ViralProj20183_genomic.gff:NC_001474.2	five_prime_UTR	NC_001474.2	QKI	ENSG00000112531
M046_0.6	7	+	1	1000	0.111	0.344671	444	0.105074	1	GCF_000871845.1_ViralProj20183_genomic.gff:NC_001474.2	three_prime_UTR	NC_001474.2	QKI	ENSG00000112531
M046_0.6	7	+	0	1000	0.033	0.178726	335	1	1	GCF_000872025.1_ViralProj20939_genomic.gff:NC_009827.1	five_prime_UTR	NC_009827.1	QKI	ENSG00000112531
M046_0.6	7	+	0	1000	0.016	0.125538	222	1	1	GCF_000872025.1_ViralProj20939_genomic.gff:NC_009827.1	three_prime_UTR	NC_009827.1	QKI	ENSG00000112531
M046_0.6	7	+	0	1000	0.015	0.121613	272	1	1	GCF_000873605.1_ViralProj20935_genomic.gff:NC_009826.1	five_prime_UTR	NC_009826.1	QKI	ENSG00000112531
M046_0.6	7	+	0	989	0.0353893	0.184855	12	1	1	GCF_000873605.1_ViralProj20935_genomic.gff:NC_009826.1	three_prime_UTR	NC_009826.1	QKI	ENSG00000112531
M046_0.6	7	+	0	1000	0.014	0.117549	272	1	1	GCF_000874265.1_ViralProj20933_genomic.gff:NC_009825.1	five_prime_UTR	NC_009825.1	QKI	ENSG00000112531
M046_0.6	7	+	0	1000	0.004	0.0631505	42	1	1	GCF_000874265.1_ViralProj20933_genomic.gff:NC_009825.1	three_prime_UTR	NC_009825.1	QKI	ENSG00000112531
M046_0.6	7	+	0	1000	0.031	0.173404	332	1	1	GCF_000874285.1_ViralProj20941_genomic.gff:NC_009824.1	five_prime_UTR	NC_009824.1	QKI	ENSG00000112531
M046_0.6	7	+	0	998	0.0310621	0.173573	13	1	1	GCF_000874285.1_ViralProj20941_genomic.gff:NC_009824.1	three_prime_UTR	NC_009824.1	QKI	ENSG00000112531
M046_0.6	7	+	0	1000	0.008	0.0891288	99	1	1	GCF_000882815.3_ViralProj36615_genomic.gff:NC_012532.1	five_prime_UTR	NC_012532.1	QKI	ENSG00000112531
M046_0.6	7	+	0	1000	0.029	0.16789	421	1	1	GCF_000882815.3_ViralProj36615_genomic.gff:NC_012532.1	three_prime_UTR	NC_012532.1	QKI	ENSG00000112531
M046_0.6	7	+	0	1000	0.135	0.364565	742	1	1	GCF_000884955.1_ViralProj38499_genomic.gff:NC_012801.1	five_prime_UTR	NC_012801.1	QKI	ENSG00000112531
M046_0.6	7	+	0	1000	0.188	0.422889	1157	1	1	GCF_000885595.1_ViralProj38497_genomic.gff:NC_012800.1	five_prime_UTR	NC_012800.1	QKI	ENSG00000112531
M046_0.6	7	+	0	1000	0.001	0.0316228	91	1	1	GCF_000885815.1_ViralProj39811_genomic.gff:NC_013060.1	three_prime_UTR	NC_013060.1	QKI	ENSG00000112531
M046_0.6	7	+	0	1000	0.044	0.205198	131	1	1	GCF_000886455.1_ViralProj38493_genomic.gff:NC_012798.1	five_prime_UTR	NC_012798.1	QKI	ENSG00000112531
M046_0.6	7	+	0	1000	0.016	0.125538	75	1	1	GCF_000886455.1_ViralProj38493_genomic.gff:NC_012798.1	three_prime_UTR	NC_012798.1	QKI	ENSG00000112531
M046_0.6	7	+	0	1000	0.119	0.350659	740	1	1	GCF_000886475.1_ViralProj38501_genomic.gff:NC_012802.1	five_prime_UTR	NC_012802.1	QKI	ENSG00000112531
M046_0.6	7	+	0	1000	0.003	0.0547174	80	1	1	GCF_000886475.1_ViralProj38501_genomic.gff:NC_012802.1	three_prime_UTR	NC_012802.1	QKI	ENSG00000112531
M046_0.6	7	+	0	1000	0.001	0.0316228	108	1	1	GCF_000897955.1_ViralProj178562_genomic.gff:NC_019027.1	three_prime_UTR	NC_019027.1	QKI	ENSG00000112531
M046_0.6	7	+	0	1000	0.075	0.267295	271	1	1	GCF_000901155.1_ViralProj183710_genomic.gff:NC_019843.3	five_prime_UTR	NC_019843.3	QKI	ENSG00000112531
M046_0.6	7	+	0	1000	0.248	0.496732	1012	1	1	GCF_000901155.1_ViralProj183710_genomic.gff:NC_019843.3	three_prime_UTR	NC_019843.3	QKI	ENSG00000112531
M046_0.6	7	+	0	1000	0.004	0.0631505	88	1	1	GCF_000901475.1_ViralProj178564_genomic.gff:NC_019026.1	three_prime_UTR	NC_019026.1	QKI	ENSG00000112531
M046_0.6	7	+	0	1000	0.011	0.104355	35	1	1	GCF_000917835.1_ViralProj242273_genomic.gff:NC_023812.1	five_prime_UTR	NC_023812.1	QKI	ENSG00000112531
M046_0.6	7	+	0	1000	0.24	0.473946	326	1	1	GCF_000917835.1_ViralProj242273_genomic.gff:NC_023812.1	three_prime_UTR	NC_023812.1	QKI	ENSG00000112531
M046_0.6	7	+	0	1000	0.06	0.257811	513	1	1	GCF_000921975.1_ViralProj253339_genomic.gff:NC_024377.1	five_prime_UTR	NC_024377.1	QKI	ENSG00000112531
M046_0.6	7	+	0	1000	0.026	0.159215	301	1	1	GCF_000921975.1_ViralProj253339_genomic.gff:NC_024377.1	three_prime_UTR	NC_024377.1	QKI	ENSG00000112531
M046_0.6	7	+	0	1000	0.03	0.170673	320	1	1	GCF_001310135.2_ViralProj298087_genomic.gff:NC_027998.2	five_prime_UTR	NC_027998.2	QKI	ENSG00000112531
M046_0.6	7	+	0	1000	0.123	0.349275	359	1	1	GCF_001310135.2_ViralProj298087_genomic.gff:NC_027998.2	three_prime_UTR	NC_027998.2	QKI	ENSG00000112531
M046_0.6	7	+	0	1000	0.036	0.186383	332	1	1	GCF_001712785.1_ViralProj339556_genomic.gff:NC_030791.1	five_prime_UTR	NC_030791.1	QKI	ENSG00000112531
M046_0.6	7	+	0	1000	0.003	0.0547174	55	1	1	GCF_001712785.1_ViralProj339556_genomic.gff:NC_030791.1	three_prime_UTR	NC_030791.1	QKI	ENSG00000112531
M046_0.6	7	+	0	1000	0.017	0.129336	175	1	1	GCF_002117635.1_ViralProj384965_genomic.gff:NC_034385.1	five_prime_UTR	NC_034385.1	QKI	ENSG00000112531
M046_0.6	7	+	0	1000	0.209	0.44217	735	1	1	GCF_002816685.1_ASM281668v1_genomic.gff:NC_038307.1	five_prime_UTR	NC_038307.1	QKI	ENSG00000112531
M046_0.6	7	+	0	1000	0.045	0.212179	92	1	1	GCF_002816685.1_ASM281668v1_genomic.gff:NC_038307.1	three_prime_UTR	NC_038307.1	QKI	ENSG00000112531
M046_0.6	7	+	1	1000	0.294	0.525205	725	0.254768	1	GCF_002816725.1_ASM281672v1_genomic.gff:NC_038308.1	five_prime_UTR	NC_038308.1	QKI	ENSG00000112531
M046_0.6	7	+	0	1000	0.071	0.26463	61	1	1	GCF_002816725.1_ASM281672v1_genomic.gff:NC_038308.1	three_prime_UTR	NC_038308.1	QKI	ENSG00000112531
M046_0.6	7	+	0	1000	0.053	0.237165	438	1	1	GCF_002820785.1_ASM282078v1_genomic.gff:NC_038426.1	five_prime_UTR	NC_038426.1	QKI	ENSG00000112531
M046_0.6	7	+	0	1000	0.005	0.070569	96	1	1	GCF_002820785.1_ASM282078v1_genomic.gff:NC_038426.1	three_prime_UTR	NC_038426.1	QKI	ENSG00000112531
M046_0.6	7	+	0	1000	0.035	0.183872	322	1	1	GCF_002821385.1_ASM282138v1_genomic.gff:NC_038436.1	five_prime_UTR	NC_038436.1	QKI	ENSG00000112531
M046_0.6	7	+	0	1000	0.037	0.194084	28	1	1	GCF_002821385.1_ASM282138v1_genomic.gff:NC_038436.1	three_prime_UTR	NC_038436.1	QKI	ENSG00000112531
M046_0.6	7	+	0	1000	0.169	0.403239	258	1	1	GCF_009858895.2_ASM985889v3_genomic.gff:NC_045512.2	five_prime_UTR	NC_045512.2	QKI	ENSG00000112531
M046_0.6	7	+	0	1000	0.04	0.201098	222	1	1	GCF_009858895.2_ASM985889v3_genomic.gff:NC_045512.2	three_prime_UTR	NC_045512.2	QKI	ENSG00000112531
M048_0.6	7	+	0	1000	0.025	0.156203	17	1	1	GCF_000850885.1_ViralProj14831_genomic.gff:NC_003908.1	five_prime_UTR	NC_003908.1	RBM3	ENSG00000102317
M048_0.6	7	+	0	1000	0.138	0.359284	294	1	1	GCF_000850885.1_ViralProj14831_genomic.gff:NC_003908.1	three_prime_UTR	NC_003908.1	RBM3	ENSG00000102317
M048_0.6	7	+	0	1000	0.081	0.294152	801	1	1	GCF_000853805.1_ViralProj14948_genomic.gff:NC_004421.1	five_prime_UTR	NC_004421.1	RBM3	ENSG00000102317
M048_0.6	7	+	0	1000	0.005	0.070569	167	1	1	GCF_000853805.1_ViralProj14948_genomic.gff:NC_004421.1	three_prime_UTR	NC_004421.1	RBM3	ENSG00000102317
M048_0.6	7	+	0	1000	0.035	0.183872	279	1	1	GCF_000853865.1_ViralProj14960_genomic.gff:NC_005831.2	five_prime_UTR	NC_005831.2	RBM3	ENSG00000102317
M048_0.6	7	+	0	1000	0.039	0.193692	280	1	1	GCF_000853865.1_ViralProj14960_genomic.gff:NC_005831.2	three_prime_UTR	NC_005831.2	RBM3	ENSG00000102317
M048_0.6	7	+	0	1000	0.036	0.186383	123	1	1	GCF_000860805.1_ViralProj15370_genomic.gff:NC_003690.1	five_prime_UTR	NC_003690.1	RBM3	ENSG00000102317
M048_0.6	7	+	0	1000	0.205	0.446289	561	1	1	GCF_000860805.1_ViralProj15370_genomic.gff:NC_003690.1	three_prime_UTR	NC_003690.1	RBM3	ENSG00000102317
M048_0.6	7	+	0	1000	0.038	0.196455	89	1	1	GCF_000861085.1_ViralProj15431_genomic.gff:NC_001563.2	five_prime_UTR	NC_001563.2	RBM3	ENSG00000102317
M048_0.6	7	+	0	1000	0.197	0.452101	566	1	1	GCF_000861085.1_ViralProj15431_genomic.gff:NC_001563.2	three_prime_UTR	NC_001563.2	RBM3	ENSG00000102317
M048_0.6	7	+	0	1000	0.223	0.464205	735	1	1	GCF_000861165.1_ViralProj15288_genomic.gff:NC_002058.3	five_prime_UTR	NC_002058.3	RBM3	ENSG00000102317
M048_0.6	7	+	1	1000	0.232	0.477917	1060	0.207074	1	GCF_000861185.1_ViralProj15292_genomic.gff:NC_001366.1	five_prime_UTR	NC_001366.1	RBM3	ENSG00000102317
M048_0.6	7	+	0	1000	0.118	0.334945	695	1	1	GCF_000861505.1_ViralProj15357_genomic.gff:NC_001897.1	five_prime_UTR	NC_001897.1	RBM3	ENSG00000102317
M048_0.6	7	+	1	1000	0.029	0.16789	80	0.0285886	1	GCF_000861505.1_ViralProj15357_genomic.gff:NC_001897.1	three_prime_UTR	NC_001897.1	RBM3	ENSG00000102317
M048_0.6	7	+	0	1000	0.091	0.30465	334	1	1	GCF_000861845.1_ViralProj15432_genomic.gff:NC_004102.1	five_prime_UTR	NC_004102.1	RBM3	ENSG00000102317
M048_0.6	7	+	0	1000	0.002	0.044699	262	1	1	GCF_000861845.1_ViralProj15432_genomic.gff:NC_004102.1	three_prime_UTR	NC_004102.1	RBM3	ENSG00000102317
M048_0.6	7	+	0	1000	0.164	0.391481	743	1	1	GCF_000861905.1_ViralProj15445_genomic.gff:NC_001612.1	five_prime_UTR	NC_001612.1	RBM3	ENSG00000102317
M048_0.6	7	+	0	1000	0.017	0.129336	74	1	1	GCF_000861905.1_ViralProj15445_genomic.gff:NC_001612.1	three_prime_UTR	NC_001612.1	RBM3	ENSG00000102317
M048_0.6	7	+	0	1000	0.01	0.0995485	37	1	1	GCF_000862105.1_ViralProj15302_genomic.gff:NC_001449.1	five_prime_UTR	NC_001449.1	RBM3	ENSG00000102317
M048_0.6	7	+	0	1000	0.013	0.113331	111	1	1	GCF_000862105.1_ViralProj15302_genomic.gff:NC_001449.1	three_prime_UTR	NC_001449.1	RBM3	ENSG00000102317
M048_0.6	7	+	0	1000	0.051	0.22461	87	1	1	GCF_000862125.1_ViralProj15306_genomic.gff:NC_001477.1	five_prime_UTR	NC_001477.1	RBM3	ENSG00000102317
M048_0.6	7	+	0	1000	0.134	0.346647	455	1	1	GCF_000862125.1_ViralProj15306_genomic.gff:NC_001477.1	three_prime_UTR	NC_001477.1	RBM3	ENSG00000102317
M048_0.6	7	+	0	1000	0.048	0.218503	122	1	1	GCF_000863165.1_ViralProj15343_genomic.gff:NC_001809.1	five_prime_UTR	NC_001809.1	RBM3	ENSG00000102317
M048_0.6	7	+	0	1000	0.159	0.39481	490	1	1	GCF_000863165.1_ViralProj15343_genomic.gff:NC_001809.1	three_prime_UTR	NC_001809.1	RBM3	ENSG00000102317
M048_0.6	7	+	0	1000	0.003	0.0547174	69	1	1	GCF_000863385.1_ViralProj15392_genomic.gff:NC_003417.1	five_prime_UTR	NC_003417.1	RBM3	ENSG00000102317
M048_0.6	7	+	0	1000	0.002	0.044699	59	1	1	GCF_000864005.1_ViralProj15520_genomic.gff:NC_001959.2	three_prime_UTR	NC_001959.2	RBM3	ENSG00000102317
M048_0.6	7	+	0	1000	0.026	0.159215	94	1	1	GCF_000865065.1_ViralProj15599_genomic.gff:NC_002640.1	five_prime_UTR	NC_002640.1	RBM3	ENSG00000102317
M048_0.6	7	+	0	1000	0.095	0.309953	377	1	1	GCF_000865065.1_ViralProj15599_genomic.gff:NC_002640.1	three_prime_UTR	NC_002640.1	RBM3	ENSG00000102317
M048_0.6	7	+	0	1000	0.064	0.24893	87	1	1	GCF_000866625.1_ViralProj15598_genomic.gff:NC_001475.2	five_prime_UTR	NC_001475.2	RBM3	ENSG00000102317
M048_0.6	7	+	0	1000	0.128	0.343123	433	1	1	GCF_000866625.1_ViralProj15598_genomic.gff:NC_001475.2	three_prime_UTR	NC_001475.2	RBM3	ENSG00000102317
M048_0.6	7	+	0	1000	0.095	0.313166	333	1	1	GCF_000871165.1_ViralProj20937_genomic.gff:NC_009823.1	five_prime_UTR	NC_009823.1	RBM3	ENSG00000102317
M048_0.6	7	+	0	1000	0.002	0.044699	262	1	1	GCF_000871165.1_ViralProj20937_genomic.gff:NC_009823.1	three_prime_UTR	NC_009823.1	RBM3	ENSG00000102317
M048_0.6	7	+	2	1000	0.297	0.53952	1033	0.0362496	1	GCF_000871545.1_ViralProj19577_genomic.gff:NC_009448.2	five_prime_UTR	NC_009448.2	RBM3	ENSG00000102317
M048_0.6	7	+	0	1000	0.009	0.0944877	39	1	1	GCF_000871545.1_ViralProj19577_genomic.gff:NC_009448.2	three_prime_UTR	NC_009448.2	RBM3	ENSG00000102317
M048_0.6	7	+	0	1000	0.039	0.193692	89	1	1	GCF_000871845.1_ViralProj20183_genomic.gff:NC_001474.2	five_prime_UTR	NC_001474.2	RBM3	ENSG00000102317
[truncated: 24,512 more rows]
