# Supplementary material for: Investigating the Human Host—ssRNA Virus Interaction Landscape Using the SMEAGOL Toolbox
Source: Viruses. 2022 Jun 29;14(7):1436. doi: 10.3390/v14071436 (PMC9317827; doi:10.3390/v14071436)
Supplement: Supplementary file 1 [file viruses-14-01436-s001.zip › Supp_Data_S5_SARS_CoV_2_validated_binders.tsv]

Gene	schmidt_et_al_binding	kamel_et_al_binding	lee_et_al_binding	in_RBP_db
A1CF	True	False	False	True
ACTA1	True	False	False	False
ACTB	True	False	False	False
ACTG1	False	True	False	False
ACTR2	True	False	False	False
ADAR	False	True	False	False
AGO2	False	True	False	False
ALMS1	True	False	False	False
ANXA1	True	True	False	False
APOE	True	False	False	False
ATP1A1	True	False	False	False
ATXN2	False	True	False	False
ATXN2L	True	True	False	False
BICC1	False	True	False	False
BRIX1	False	True	False	False
BTF3	False	True	False	False
CAPRIN1	True	True	False	False
CCT3	True	False	False	False
CELF1	False	True	True	True
CEP162	False	True	False	False
CFL1	True	False	False	False
CHTOP	False	True	False	False
CNBP	True	True	True	False
CPEB4	False	True	False	True
CPQ	False	True	False	False
CSDE1	True	True	True	False
DAZAP1	False	True	False	True
DDX1	False	True	False	False
DDX3X	True	True	False	False
DDX6	False	True	False	False
DDX60	False	True	False	False
DHX57	False	True	False	False
DKC1	False	True	False	False
DMD	False	True	False	False
DOX1	True	False	False	False
EEF1A1	True	False	False	False
EEF1A2	False	True	False	False
EEF2	True	False	False	False
EGFR	True	False	False	False
EIF1AY	True	False	False	False
EIF3A	False	True	False	False
EIF3C	True	True	False	False
EIF3D	False	True	True	False
EIF3E	True	False	False	False
EIF3G	True	True	False	False
EIF3H	True	False	False	False
EIF3L	True	False	False	False
EIF4A1	False	True	False	False
EIF4A2	False	True	False	False
EIF4B	True	True	True	True
EIF4G1	True	True	False	False
EIF4G3	False	True	False	False
EIF4H	True	True	True	False
EIF5A	True	False	False	False
ELAVL1	False	True	True	True
FAM120A	False	True	True	False
FAM98A	False	True	False	False
FMR1	False	True	False	True
FTSJ3	False	True	False	False
FUBP3	True	True	True	True
FXR1	False	True	True	True
FXR2	False	True	False	True
G3BP1	True	True	True	True
G3BP2	True	True	True	True
GALNT1	True	False	False	False
GDI2	True	False	False	False
GPI	True	False	False	False
GSPT1	True	False	False	False
GTPBP4	False	True	False	False
HDLBP	True	True	False	False
HNRNPA0	True	True	False	True
HNRNPA1	True	True	False	True
HNRNPA2B1	True	True	False	True
HNRNPA3	True	True	False	False
HNRNPAB	True	False	True	False
HNRNPC	False	True	False	True
HNRNPDL	False	True	False	True
HNRNPL	True	True	False	True
HNRNPM	False	True	False	False
HNRNPR	False	True	False	False
HSP90AA1	False	True	False	False
HSP90AB1	False	True	False	False
HSPA5	False	True	False	False
HSPA8	False	True	False	False
HSPB1	False	True	False	False
IGF2BP1	True	True	False	True
IGF2BP2	True	True	True	True
IGF2BP3	False	True	True	True
L1RE1	False	True	False	False
LARP4	True	True	False	False
LARP4B	False	True	False	False
LASP1	True	False	False	False
LIN28B	True	False	False	False
LIN7C	False	True	False	False
LSG1	False	True	False	False
LSM14A	True	True	False	False
MATR3	False	False	True	True
MBNL1	False	True	False	True
MOV10	True	False	True	False
MPHOSPH10	False	True	False	False
MSI2	True	True	False	False
MTHFSD	False	True	False	False
MYBBP1A	False	True	False	False
MYH9	False	True	False	False
NCL	False	True	False	False
NME8	False	True	False	False
NONO	False	False	True	True
NPM1	False	True	True	False
NUFIP2	False	True	False	False
OASL	False	True	False	False
PABPC1	True	True	True	True
PABPC4	True	True	True	True
PABPN1	False	True	False	True
PARP12	False	False	True	False
PCBP1	False	True	False	True
PCBP2	True	False	False	True
PDCD11	False	True	False	False
PEBP1	True	False	False	False
PFN1	True	False	False	False
PGK1	True	False	False	False
PKM	False	True	False	False
PPIA	True	False	False	False
PPP1CA	False	True	False	False
PPP1CB	True	True	False	False
PPP1CC	True	False	False	False
PPP1R3A	False	True	False	False
PRRC2A	False	True	False	False
PRRC2C	False	True	False	False
PTBP1	False	True	True	True
PTBP2	False	True	False	False
PTBP3	False	True	True	True
PUM1	True	True	False	True
PUM2	False	True	False	True
PURA	False	True	False	False
PURB	True	True	False	False
RAB6A	True	False	False	False
RAB6D	True	False	False	False
RAB7A	True	False	False	False
RALY	False	False	True	True
RAN	False	True	False	False
RBM3	False	True	True	True
RBM38	False	True	False	False
RBM47	True	True	False	True
RBMS1	False	True	False	True
RBMS2	True	True	False	True
RPL13	True	False	False	False
RPL15	True	False	False	False
RPL17	False	False	True	False
RPL18A	True	False	True	False
RPL21	True	False	False	False
RPL24	False	False	True	False
RPL28	True	False	False	False
RPL3	True	False	False	False
RPL36AL	True	False	False	False
RPL6	True	False	False	False
RPL7A	True	False	False	False
RPL8	True	False	False	False
RPS10	True	False	False	False
RPS11	True	False	True	False
RPS12	True	False	False	False
RPS14	True	False	False	False
RPS2	True	True	False	False
RPS26	True	False	False	False
RPS3	True	True	False	False
RPS3A	False	False	True	False
RPS4X	True	False	False	False
RPS5	True	False	False	False
RPS9	False	False	True	False
RSL1D1	False	True	False	False
RTCB	True	True	False	False
RYDEN	True	False	False	False
SCFD1	True	False	False	False
SERBP1	True	False	True	False
SF3B2	False	True	False	False
SND1	True	True	True	False
SNRPD2	False	True	False	False
SNRPN	False	True	False	False
SPATS2L	False	True	False	False
SRI	True	False	False	False
SRP14	False	True	False	False
STIP1	True	False	False	False
STOM	True	False	False	False
STRAP	True	False	False	False
SYNCRIP	True	True	False	False
SYNE1	False	True	False	False
SYNE2	False	True	False	False
TAGLN2	True	False	False	False
TIA1	False	True	False	True
TIAL1	False	True	False	True
TROVE2	False	True	False	False
UBAP2L	False	True	False	False
UPF1	True	False	False	False
USO1	True	False	False	False
USP10	False	True	False	False
VAT1	False	True	False	False
WDR43	False	True	False	False
YBX1	True	True	True	True
YBX3	True	True	True	False
YTHDC2	False	True	False	False
YTHDF2	True	False	False	False
YWHAZ	True	False	False	False
ZC3HAV1	False	False	True	False
ZNFX1	False	True	False	False
